# Supplementary material
Source: PubMed Central journal article supplement (PMC8501777)
Supplement: pnas.2113122118.sapp.pdf [file pnas.2113122118.sapp.pdf]

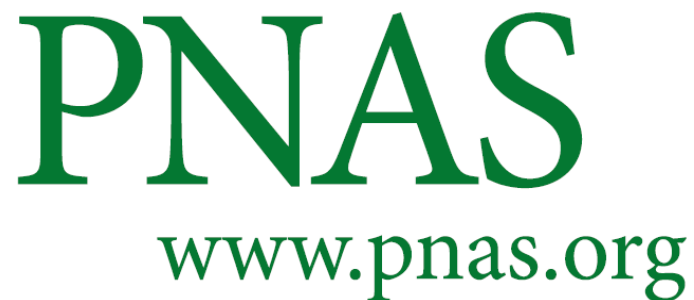

**Supplementary Information for**  
Chirality-Matched Catalyst-Controlled Macrocyclization Reactions

Jaeyeon Hwang<sup>a</sup>, Brandon, Q. Mercado<sup>a</sup>, Scott J. Miller<sup>a\*</sup>

<sup>a</sup>Department of Chemistry, Yale University, P.O. Box 208107, New Haven, Connecticut 06520-8107, United States

corresponding author: Scott J. Miller\*

Email: [scott.miller@yale.edu](mailto:scott.miller@yale.edu)

**This PDF file includes:**

Supplementary text  
Figures S1 to S4  
Tables S1 to S4  
SI References

## Table of Contents

|                                                                                                                        |     |
|------------------------------------------------------------------------------------------------------------------------|-----|
| 1. General Information.....                                                                                            | 3   |
| 1.1 Abbreviation .....                                                                                                 | 5   |
| 2. Synthesis of Guanidinylated Amino Acid Ligands .....                                                                | 6   |
| 3. Synthesis of Diarylmethane .....                                                                                    | 6   |
| 4. Synthesis of Bifunctional Nucleophiles.....                                                                         | 6   |
| 4.1 General Synthetic Routes for Bifunctional Nucleophiles:.....                                                       | 6   |
| 4.2 General Procedure 1: Sonogashira Coupling.....                                                                     | 6   |
| 4.3 General Procedure 2: Acylation of Alcohols.....                                                                    | 7   |
| 4.4 General Procedure 3: Hydrogenolysis & Nitro Reduction .....                                                        | 7   |
| 5. Characterization and Spectra of Bifunctional Nucleophiles and Intermediates .....                                   | 7   |
| 5.1 Cross-coupled Products .....                                                                                       | 7   |
| 5.2 Acylation Products.....                                                                                            | 10  |
| 5.3 Hydrogenolysis Products: Bifunctional Nucleophiles .....                                                           | 13  |
| 6. Synthesis of Aminophenol 2f.....                                                                                    | 37  |
| 6.1 General Synthetic Route to 2f.....                                                                                 | 37  |
| 6.2 Characterization of Aminophenol 2f and Intermediates.....                                                          | 37  |
| 7. Bimolecular Competition Experiments: Determination of Chemoselectivity .....                                        | 44  |
| 7.1 Table S1. Bimolecular competition experiments <sup>a</sup> .....                                                   | 45  |
| 8. Procedures for Cu-catalyzed Intermolecular C–C Coupling .....                                                       | 45  |
| 8.1 Procedure 4: Cu-catalyzed Intramolecular C–C Coupling with an Achiral Ligand.....                                  | 45  |
| 8.2 Procedure 5: Preparation of Enantioenriched Diarylmethanes by C–C Coupling..                                       | 46  |
| 8.3 Procedure 6: TBS Deprotection en route to Aminophenol 3f.....                                                      | 46  |
| 8.4 Characterization and Spectra of Linear Precursors.....                                                             | 48  |
| 8.5 HPLC Traces of Linear Precursors (3a-3f).....                                                                      | 88  |
| 9. Reaction Optimizations and Procedures for Macrocyclization via Cu-catalyzed intramolecular C–N cross-coupling ..... | 92  |
| 9.1 Procedure 7: Protocols for Small-Scale Intramolecular Ullmann cross-coupling..                                     | 92  |
| Figure S1. Sample of Determination of NMR yield.....                                                                   | 93  |
| 9.2 Identification of Optimal Model Substrates <sup>a,b,c</sup> .....                                                  | 93  |
| 9.3 Table S2: Cu(I) Screen.....                                                                                        | 94  |
| 9.4 Table S3: Concentration Effects .....                                                                              | 94  |
| 9.5 Table S4: Temperature & Copper Loading .....                                                                       | 95  |
| 10. Procedure 8: Macrocyclization of Diarylmethanes Under Optimized Conditions .....                                   | 96  |
| 11. Kinetic Resolution of Diarylmethanes Under Optimized Conditions .....                                              | 96  |
| 12. Characterization and Spectra of Macrocyclic Products (4a-4f, 5f).....                                              | 98  |
| 12.1 HPLC Traces of Macrocyclic Compounds (4a-f).....                                                                  | 127 |
| 13. Product Distribution: Macrocyclization of 3a, 3b and 3c (UPLC-MS Traces) .....                                     | 133 |
| 14. Product Distribution: Macrocyclization of Aminophenol 3f (UPLC-MS Traces) ...                                      | 134 |
| 15. NMR Studies.....                                                                                                   | 136 |
| 15.1 VT-NMR Experiments <sup>a,b,c</sup> .....                                                                         | 136 |
| 15.2 Deuterium Incorporation in Methanol-d <sub>4</sub> : .....                                                        | 138 |
| 15.3 <sup>1</sup> H NMR Spectra of 4a in Different NMR Solvents .....                                                  | 139 |
| 16. Crystallographic Data .....                                                                                        | 142 |

## 1. General Information

Room temperature is defined as 21–25 °C. The following reagents, CuBr (99.998%, STREM), CuI (99.998%, STREM), Cu(MeCN)<sub>4</sub>BF<sub>4</sub> (>98%, TCI America), Cs<sub>2</sub>CO<sub>3</sub> (99.9%, Sigma-Aldrich) and K<sub>3</sub>PO<sub>4</sub> (99.9%, Sigma-Aldrich) were purchased from the corresponding commercial suppliers and used as received. All other reagents were purchased from commercial suppliers and used without further purification, unless otherwise noted. Acetonitrile, *N,N*-dimethylformamide, toluene and tetrahydrofuran were obtained from a Seca Solvent System by GlassContour, in which the solvent was dried over alumina and dispensed under an atmosphere of Ar. Triethylamine (Et<sub>3</sub>N), *N,N*-diisopropyl ethylamine (<sup>i</sup>Pr<sub>2</sub>NEt) and pyridine were distilled over CaH<sub>2</sub> under a nitrogen atmosphere prior to use. All other solvents were purchased from commercial suppliers and used without further purification, unless otherwise noted.

Routine <sup>1</sup>H NMR spectra were recorded on Agilent 400, 500, or 600 MHz spectrometers at ambient temperature unless otherwise stated. All NMR solvents were purchased from Cambridge Isotope Laboratories and used without further purification. Chloroform-*d*, dichloromethane-*d*<sub>2</sub>, acetone-*d*<sub>6</sub>, acetonitrile-*d*<sub>3</sub>, and deuterium oxide-*d*<sub>2</sub> were stored at ambient temperature, and methanol-*d*<sub>4</sub> and dimethylsulfoxide-*d*<sub>6</sub> ampoules were used immediately after opening. Spectra were processed using MestReNova 14.2.0 using the automatic phasing and polynomial baseline correction capabilities. Splitting was determined using the automatic multiplet analysis function with manual intervention as necessary. Spectral data are reported as follows: chemical shift (multiplicity [singlet (s), broad singlet (brs), doublet (d), triplet (t), quartet (q), pentet (p), multiplet (m), doublet of doublets (dd), doublet of doublet of doublets (ddd), doublet of triplet of doublets (dtd), doublet of doublet of doublet of doublets (dddd), doublet of triplets (dt), triplet of doublets (td), etc.], coupling constant, integration). Chemical shifts are reported in ppm (δ), and coupling constants are reported in Hz. <sup>1</sup>H Resonances are referenced to solvent residual peaks for CDCl<sub>3</sub> (7.26 ppm), CD<sub>2</sub>Cl<sub>2</sub> (5.32 ppm), DMSO-*d*<sub>6</sub> (2.50 ppm), D<sub>2</sub>O (4.79 ppm), CD<sub>3</sub>CN (1.79 ppm), or CD<sub>3</sub>OD (3.31 ppm).<sup>1</sup> Routine <sup>13</sup>C NMR spectra were recorded on Agilent 400, 500, or 600 MHz spectrometers with protons fully decoupled. <sup>13</sup>C Resonances are reported in ppm relative to solvent residual peaks for CDCl<sub>3</sub> (77.16 ppm), CD<sub>2</sub>Cl<sub>2</sub> (53.84 ppm) or CD<sub>3</sub>OD (49.0 ppm).<sup>1</sup> Note: Small deviations in chemical shifts may be observed depending on the concentration of NMR samples.

Infrared spectra were recorded on a Nicolet 6700 ATR/FT-IR spectrometer, and  $\nu_{\max}$  are partially reported in cm<sup>-1</sup>. High-resolution mass spectrometry was performed by Chemical and Biophysical Instrumentation Center at Yale University, on a Waters Xevo Q-TOF high-resolution Mass Spectrometry using ESI. Ultra high-performance liquid chromatography-mass spectrometry (UPLC/MS) was performed on a Waters Acquity SQD2 instrument equipped with an Ultra BEH C-18 column (1.7 μm particle size, 2.1 × 50 mm), a dual atmospheric pressure chemical ionization (API)/electrospray ionization S4 (ESI) mass spectrometry detector, and a photodiode array detector. Analytical thinlayer chromatography was performed using 60 Å Silica Gel F254 pre-coated plates (0.25 mm thickness). TLC plates were visualized by irradiation with a UV lamp. *R<sub>f</sub>* values are reported. Normal-phase column chromatography was performed using 60 Å Silica Gel (32–62 micron) with an appropriate mobile phase composition and gradient. Optical rotations were recorded on a Perkin-Elmer Polarimeter 341 at the sodium D-line (589 nm) using a cell of 50 mm path length. Measurements were recorded at 20 °C. Concentration

values are reported in units of g/100 mL. Normal-phase high-performance liquid chromatography was performed using an Agilent 1100 series instrument equipped with a diode array detector and columns (chiral supports) from Daicel Chemical Industries.

In many cases, normal-phase flash chromatography was performed using a Biotage Isolera One purification system equipped with a 10, 25, 50 or 100 g SNAP Ultra (HP Sphere, 25  $\mu$ m silica) cartridge and an appropriate EtOAc/Hex linear gradient in the mobile phase. Reversed-phase column chromatography was performed using a Biotage Isolera One purification system equipped with a 15, 30, 60 or 120 g SNAP-C18 column and an appropriate MeOH/H<sub>2</sub>O or MeCN/H<sub>2</sub>O linear gradient in the mobile phase.

### 1.1 Abbreviation

|                                 |                                                                                   |
|---------------------------------|-----------------------------------------------------------------------------------|
| Aib                             | 2-aminoisobutyric acid                                                            |
| Boc                             | <i>tert</i> -Butoxycarbonyl                                                       |
| CDCl <sub>3</sub>               | Chloroform- <i>d</i>                                                              |
| CD <sub>2</sub> Cl <sub>2</sub> | Methylene chloride- <i>d</i> <sub>2</sub>                                         |
| CD <sub>3</sub> OD              | Methanol- <i>d</i> <sub>4</sub>                                                   |
| DCM                             | Dichloromethane                                                                   |
| DIPEA                           | <i>N,N</i> -Diisopropylethylamine                                                 |
| DMF                             | <i>N,N</i> -Dimethylformamide                                                     |
| DMSO                            | Dimethylsulfoxide                                                                 |
| EDC                             | 1-Ethyl-3-(3-dimethylaminopropyl)carbodiimide                                     |
| EtOAc                           | Ethyl acetate                                                                     |
| EtOH                            | Ethanol                                                                           |
| HBTU                            | (2-(1 <i>H</i> -benzotriazol-1-yl)-1,1,3,3-tetramethyluronium hexafluorophosphate |
| Hex                             | Hexanes                                                                           |
| HOBt                            | 1-Hydroxybenzotriazole                                                            |
| HPLC                            | High-performance liquid chromatography                                            |
| HRMS                            | High-resolution mass spectrometry                                                 |
| IPA                             | Isopropyl alcohol                                                                 |
| LC-MS                           | Liquid chromatography mass spectrometry                                           |
| MeCN                            | Acetonitrile                                                                      |
| MeOH                            | Methanol                                                                          |
| NBS                             | <i>N</i> -Bromosuccinimide                                                        |
| rt                              | Room temperature                                                                  |
| TFA                             | Trifluoroacetic acid, trifluoroacetate                                            |
| THF                             | Tetrahydrofuran                                                                   |
| TBS                             | <i>tert</i> -Butyldimethylsilyl                                                   |
| UPLC                            | Ultra Performance Liquid Chromatography                                           |
| TLC                             | Thin-layer chromatography                                                         |
| TMG                             | Tetramethylguanidine                                                              |
| Tol                             | Toluene                                                                           |

## 2. Synthesis of Guanidinylated Amino Acid Ligands

Guanidinylated ligands used in this study (**L1**, *ent*-**L2**, **L2**, **L3** and *ent*-**L4**) were prepared by following the previously reported procedures.<sup>2</sup> Example synthesis is shown below:

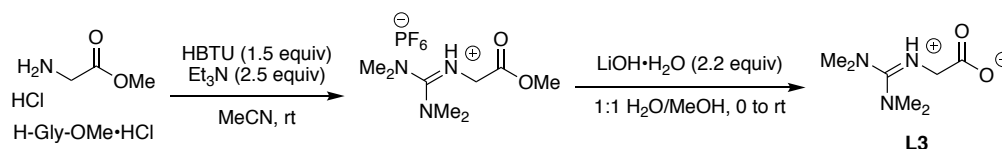

## 3. Synthesis of Diarylmethane

Diarylmethane **1** was prepared by following the previously reported procedures.<sup>2a</sup>

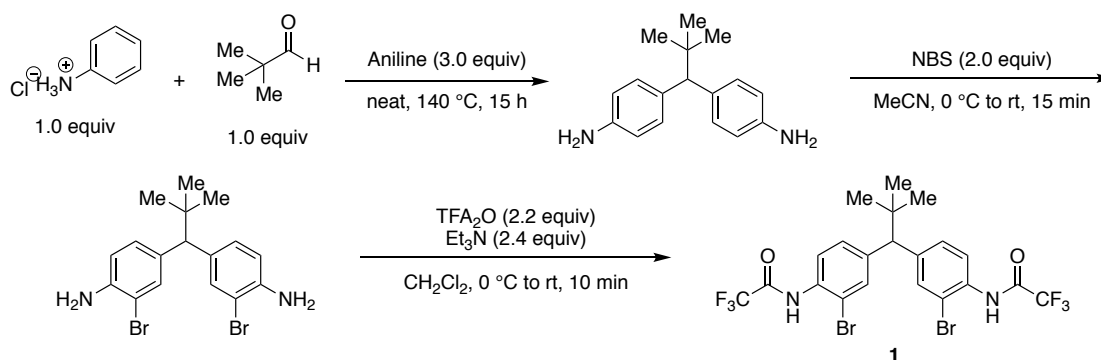

## 4. Synthesis of Bifunctional Nucleophiles

### 4.1 General Synthetic Routes for Bifunctional Nucleophiles:

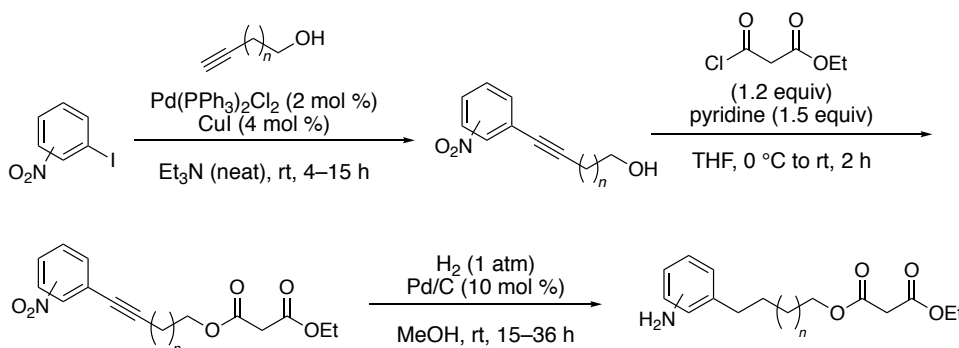

### 4.2 General Procedure 1: Sonogashira Coupling

To a flame-dried RBF equipped with a magnetic stir bar was added aryl iodide (1.00 equiv), Pd(PPh<sub>3</sub>)<sub>2</sub>Cl<sub>2</sub> (0.02 equiv) and CuI (0.04 equiv). Reaction vessel was evacuated and backfilled with N<sub>2</sub> × 3. Dry Et<sub>3</sub>N (1.0 M) (distilled over CaH<sub>2</sub> and stored under N<sub>2</sub>) was added through the septa. To the stirring mixture was added alcohol (1.20 equiv). Reaction mixture was left to stir for 4–15 h until reaction was complete (monitored by TLC). The reaction mixture was diluted with EtOAc and washed with sat. NH<sub>4</sub>Cl (aq). Aqueous layer

was extracted with EtOAc  $\times$  3. Combined organic layers were washed with sat. NaCl (aq), dried over anhydrous Na<sub>2</sub>SO<sub>4</sub>, filtered and concentrated in vacuo. The crude material was purified by flash chromatography to afford the desired material.

### 4.3 General Procedure 2: Acylation of Alcohols

To a flame-dried RBF equipped with magnetic stir bar was added nitrobenzene **S1–S8** (1.00 equiv) and anhydrous THF (0.12 M). Reaction mixture was cooled to 0 °C. Dry pyridine (1.50 equiv) distilled over CaH<sub>2</sub> was added dropwise to the stirring mixture. Ethyl malonyl chloride (1.20 equiv) in THF (1.00 M) was subsequently added dropwise to the stirring mixture. Reaction mixture was warmed to room temperature, and left to stir for 2 hours until reaction was complete (monitored by TLC). Reaction mixture was diluted with CH<sub>2</sub>Cl<sub>2</sub> and quenched with 10% (w/v) citric acid (aq). Aqueous layer was extracted with CH<sub>2</sub>Cl<sub>2</sub>  $\times$  3. Combined organic layers were washed with sat. NaCl (aq), dried over anhydrous Na<sub>2</sub>SO<sub>4</sub>, filtered and concentrated in vacuo. The crude material was then purified by flash chromatography to afford desired material.

### 4.4 General Procedure 3: Hydrogenolysis & Nitro Reduction

To a flame-dried RBF equipped with magnetic stir bar was added nitrobenzene **S9–S16** and MeOH (0.5 M). Reaction mixture was sparged with N<sub>2</sub> for 15 minutes. Pd/C (10 wt % – 50% wet with water) was added to the reaction mixture then further sparged with N<sub>2</sub> for 15 minutes. Atmosphere was switched to H<sub>2</sub> via balloon and reaction mixture was left to stir overnight (15 h) at room temperature. The mixture was filtered through Celite ® and concentrated *in vacuo*. The crude material was purified by silica chromatography to afford the desired products.

## 5. Characterization and Spectra of Bifunctional Nucleophiles and Intermediates

### 5.1 Cross-coupled Products

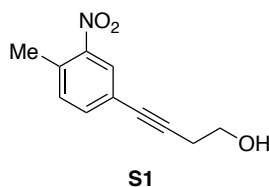

**4-(4-methyl-3-nitrophenyl)but-3-yn-1-ol (S1)** was synthesized from 4-iodo-1-methyl-2-nitrobenzene following **General Procedure 1**. Crude material was purified by silica chromatography (0→40→60% EtOAc/Hex) to yield **S1** as an orange solid (1.5392 g, 99% yield).

**TLC** (40% EtOAc/Hex): R<sub>f</sub> = 0.40.

**IR** (FT-ATR, cm<sup>-1</sup>, neat): ν<sub>max</sub> 3245, 2934, 2086, 2078, 1521, 1445, 1377, 1344, 1054, 1025, 857, 667.

**<sup>1</sup>H NMR** (600 MHz, CDCl<sub>3</sub>) δ 7.99 (s, 1H), 7.51 – 7.47 (m, 1H), 7.26–25 (m, 1H), 3.83 (t, *J* = 6.2 Hz, 2H), 2.69 (t, *J* = 6.3 Hz, 2H), 2.57 (s, 3H), 1.92 (s, 1H).

**<sup>13</sup>C NMR** (151 MHz, CDCl<sub>3</sub>) δ 149.1, 135.8, 133.3, 132.9, 127.8, 122.7, 88.9, 80.2, 61.1, 23.8, 20.5.

**HRMS** (ESI/Q-TOF): Exact mass calculated for [C<sub>11</sub>H<sub>11</sub>NO<sub>3</sub> + H]<sup>+</sup> requires *m/z* = 206.0817, found *m/z* = 206.0820.

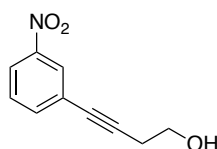

S2

**4-(3-nitrophenyl)but-3-yn-1-ol (S2)** was synthesized from 1-iodo-3-nitrobenzene following **General Procedure 1**. Crude material was purified by silica chromatography (0→40% EtOAc/Hex) to yield **S2** as a beige solid (1.6193 g, 92% yield). Characterization data is in agreement with reported values.<sup>3</sup>

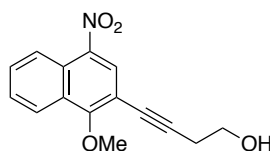

S3

**4-(1-methoxy-4-nitronaphthalen-2-yl)but-3-yn-1-ol (S3)** was synthesized from 2-iodo-1-methoxy-4-nitronaphthalene<sup>4</sup> following **General Procedure 1**. Crude material was purified by silica chromatography (0→30→60% EtOAc/Hex) to yield **S3** as a yellow solid (1.3970g, 89% yield). Characterization data is in agreement with reported values.<sup>4</sup>

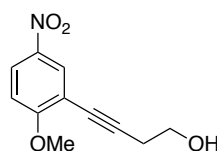

S4

**4-(2-methoxy-5-nitrophenyl)but-3-yn-1-ol (S4)** was synthesized from 2-iodo-1-methoxy-4-nitrobenzene following **General Procedure 1**. Crude material was purified by flash chromatography (0→30→ 50% EtOAc/Hex) to yield **S4** as a beige solid (1.0670 g, 93% yield).

**TLC** (30% EtOAc/Hex): *R<sub>f</sub>* = 0.27.

**<sup>1</sup>H NMR** (400 MHz, CD<sub>2</sub>Cl<sub>2</sub>) δ 8.25 – 8.22 (m, 1H), 8.16 (dd, *J* = 9.2, 2.7 Hz, 1H), 6.95 (d, *J* = 9.2 Hz, 1H), 3.96 (s, 3H), 3.79 (q, *J* = 6.2 Hz, 2H), 2.71 (t, *J* = 6.2 Hz, 2H), 1.93 (t, *J* = 6.3 Hz, 1H).

**<sup>13</sup>C NMR** (101 MHz, CD<sub>2</sub>Cl<sub>2</sub>) δ 165.2, 144.4, 129.2, 125.6, 114.0, 110.8, 93.8, 76.8, 61.2, 57.1, 24.4.



**IR** (FT-ATR,  $\text{cm}^{-1}$ , neat):  $\nu_{\text{max}}$  3268, 3078, 2947, 2883, 2338, 1577, 1504, 1332, 1266, 1093, 928.

**HRMS** (ESI/Q-TOF): Exact mass calculated for  $[\text{C}_{11}\text{H}_{11}\text{NO}_4 + \text{H}]^+$  requires  $m/z = 222.0761$ , found  $m/z = 222.0755$ .

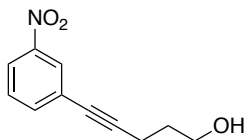

S5

**5-(3-nitrophenyl)pent-4-yn-1-ol (S5)** was synthesized from 1-iodo-3-nitrobenzene following **General Procedure 1**. Crude material was purified by silica chromatography (0→30→60% EtOAc/Hex) to yield **S5** as a pale yellow oil (1.7003g, quantitative yield). Characterization data is in agreement with reported values.<sup>5</sup>

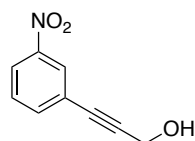

S6

**3-(3-nitrophenyl)prop-2-yn-1-ol (S6)** was synthesized from 1-iodo-3-nitrobenzene following **General Procedure 1**. Crude material was purified by silica chromatography (0→40% EtOAc/Hex) to yield **S6** as a light brown oil (0.4808 g, 92% yield). Characterization data is in agreement with reported values.<sup>6</sup>

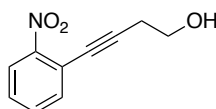

S7

**4-(2-nitrophenyl)but-3-yn-1-ol (S7)** was synthesized from 1-iodo-2-nitrobenzene following **General Procedure 1**. Crude material was purified by silica chromatography (0→50→80% EtOAc/Hex) to yield **S7** as a brown oil (3.7858 g, 98% yield).

**TLC** (50% EtOAc/Hex): 0.46.

**$^1\text{H}$  NMR** (400 MHz,  $\text{CDCl}_3$ )  $\delta$  8.05–7.96 (m, 1H), 7.68–7.51 (m, 2H), 7.48–7.38 (m, 1H), 3.86 (t,  $J = 6.0$  Hz, 2H), 2.75 (t,  $J = 6.0$  Hz, 2H), 2.16 (s, 1H).

**$^{13}\text{C}$  NMR** (101 MHz,  $\text{CDCl}_3$ )  $\delta$  150.2, 134.8, 133.0, 128.5, 124.8, 118.9, 95.8, 78.1, 61.0, 24.4.

**IR** (FT-ATR,  $\text{cm}^{-1}$ , neat):  $\nu_{\text{max}}$  3373, 2886, 2335, 1519, 1479, 1340, 1039, 743.

**HRMS** (ESI/Q-TOF): Exact mass calculated for  $[\text{C}_{10}\text{H}_9\text{NO}_3 + \text{H}]^+$  requires  $m/z = 192.0655$ , found  $m/z = 192.0665$ .

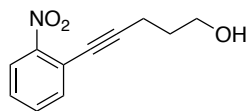

S8

**5-(2-nitrophenyl)pent-4-yn-1-ol (S8)** was synthesized from 1-iodo-2-nitrobenzene following **General Procedure 1**. Crude material was purified by silica chromatography (0→50→80% EtOAc/Hex) to yield **S8** as a brown oil (2.8462 g, 84% yield). Characterization data is in agreement with reported values.<sup>7</sup>

## 5.2 Acylation Products

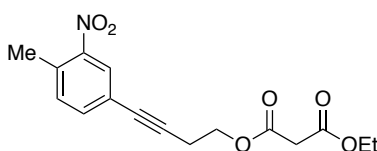

S9

**Ethyl (4-(4-methyl-3-nitrophenyl)but-3-yn-1-yl) malonate (S9)** was synthesized from **S1** following **General Procedure 2**. Crude material was purified by silica chromatography (0→20→50% EtOAc/Hex) to yield **S9** as a pale yellow oil (1.2873 g, 69% yield).

**TLC** (30% EtOAc/Hex):  $R_f = 0.48$ .

**IR** (FT-ATR,  $\text{cm}^{-1}$ , neat):  $\nu_{\text{max}}$  2991, 2119, 1731, 1527, 1332, 1145, 1030, 832.

**$^1\text{H}$  NMR** (600 MHz,  $\text{CDCl}_3$ )  $\delta$  7.99 (d,  $J = 1.3$  Hz, 1H), 7.50 (dd,  $J = 7.9, 1.4$  Hz, 1H), 7.27 (d,  $J = 7.4$  Hz, 1H), 4.34 (t,  $J = 6.8$  Hz, 2H), 4.21 (q,  $J = 7.1$  Hz, 2H), 3.42 (s, 2H), 2.79 (t,  $J = 6.8$  Hz, 2H), 2.58 (s, 3H), 1.27 (t,  $J = 7.1$  Hz, 2H).

**$^{13}\text{C}$  NMR** (151 MHz,  $\text{CDCl}_3$ )  $\delta$  166.5, 166.5, 149.2, 135.8, 133.4, 132.9, 127.8, 122.6, 87.4, 80.0, 63.1, 61.8, 41.6, 20.5, 19.9, 14.2.

**HRMS** (ESI/Q-TOF): Exact mass calculated for  $[\text{C}_{16}\text{H}_{17}\text{NO}_6 + \text{H}]^+$  requires  $m/z = 320.1129$ , found  $m/z = 320.1143$ .

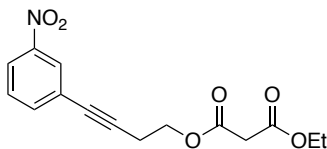

S10

**Ethyl (4-(3-nitrophenyl)but-3-yn-1-yl) malonate (S10)** was synthesized from **S2** following **General Procedure 2**. Crude material was purified by silica chromatography (0→30→50% EtOAc/Hex) to yield **S10** as a pale yellow oil (1.9685 g, 76% yield).

**TLC** (20% EtOAc/Hex):  $R_f = 0.38$ .

**IR** (FT-ATR,  $\text{cm}^{-1}$ , neat):  $\nu_{\text{max}}$  3084, 2961, 2114, 1730, 1528, 1369, 1350, 1144, 1030, 899.

**$^1\text{H}$  NMR** (500 MHz,  $\text{CDCl}_3$ ):  $\delta$  8.24 (s, 1H), 8.13 (d,  $J = 8.2$  Hz, 1H), 7.69 (d,  $J = 7.7$  Hz, 1H), 7.47 (t,  $J = 8.0$  Hz, 1H), 4.35 (t,  $J = 6.7$  Hz, 2H), 4.20 (q,  $J = 7.1$  Hz, 2H), 3.42 (s, 2H), 2.80 (t,  $J = 6.7$  Hz, 2H), 1.27 (t,  $J = 7.1$  Hz, 3H).

$^{13}\text{C}$  NMR (126 MHz,  $\text{CDCl}_3$ )  $\delta$  166.5, 166.4, 148.2, 137.5, 129.4, 126.6, 125.2, 122.9, 88.3, 80.1, 63.0, 61.8, 41.6, 19.9, 14.2.

HRMS(ESI/Q-TOF): Exact mass calculated for  $[\text{C}_{15}\text{H}_{15}\text{NO}_6 + \text{H}]^+$  requires  $m/z = 306.0972$ , found  $m/z = 306.0970$ .

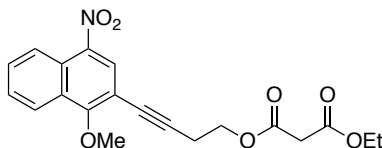

S11

**Ethyl (4-(1-methoxy-4-nitronaphthalen-2-yl)but-3-yn-1-yl) malonate (S11)** was synthesized from **S3** following **General Procedure 2**. Crude material was purified by silica chromatography (0  $\rightarrow$  25% EtOAc/Hex) to yield **S11** as a yellow oil (0.8845 g, 87% yield). TLC (30% EtOAc/Hex):  $R_f = 0.35$ .

IR (FT-ATR,  $\text{cm}^{-1}$ , neat):  $\nu_{\text{max}}$  2965, 2906, 2084, 1751, 1720, 1620, 1511, 1321, 1269, 1143, 1037, 785.

$^1\text{H}$  NMR (400 MHz,  $\text{CDCl}_3$ ):  $\delta$  8.62 (d,  $J = 8.7$  Hz, 1H), 8.30 (dd,  $J = 9.0, 1.5$  Hz, 2H), 7.73 (ddd,  $J = 8.7, 6.9, 1.4$  Hz, 1H), 7.62 (ddd,  $J = 8.3, 6.9, 1.2$  Hz, 1H), 4.40 (t,  $J = 6.7$  Hz, 2H), 4.29 (s, 3H), 4.21 (q,  $J = 7.1$  Hz, 2H), 3.43 (s, 2H), 2.90 (t,  $J = 6.7$  Hz, 2H), 1.28 (t,  $J = 7.2$  Hz, 3H).

$^{13}\text{C}$  NMR (151 MHz,  $\text{CDCl}_3$ )  $\delta$  166.5, 166.4, 162.5, 141.3, 130.4, 130.2, 128.6, 127.7, 126.3, 123.6, 123.4, 108.5, 92.5, 77.6, 63.1, 61.9, 61.8, 41.6, 20.3, 14.2.

HRMS(ESI/Q-TOF): Exact mass calculated for  $[\text{C}_{20}\text{H}_{19}\text{NO}_7 + \text{H}]^+$  requires  $m/z = 386.1234$ , found  $m/z = 386.1231$ .

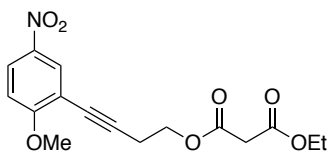

S12

**Ethyl (4-(2-methoxy-5-nitrophenyl)but-3-yn-1-yl) malonate (S12)** was synthesized from **S4** following **General Procedure 2**. Crude material was purified by silica chromatography (10  $\rightarrow$  50% EtOAc/Hex) to yield the desired product **S12** as a yellow oil (1.5077 g, quantitative yield).

TLC (50% EtOAc/Hex):  $R_f = 0.50$

IR (FT-ATR,  $\text{cm}^{-1}$ , neat):  $\nu_{\text{max}}$  3080, 2970, 1729, 1514, 1340, 1230, 1013, 749.

$^1\text{H}$  NMR (600 MHz,  $\text{CDCl}_3$ ):  $\delta$  8.27 (d,  $J = 2.8$  Hz, 1H), 8.18 (dd,  $J = 9.2, 2.8$  Hz, 1H), 6.92 (d,  $J = 9.2$  Hz, 1H), 4.36 (t,  $J = 6.9$  Hz, 2H), 4.21 (q,  $J = 7.1$  Hz, 2H), 3.98 (s, 3H), 3.42 (s, 2H), 2.85 (t,  $J = 6.9$  Hz, 2H), 1.28 (t,  $J = 7.1$  Hz, 3H).

$^{13}\text{C}$  NMR (151 MHz,  $\text{CDCl}_3$ ):  $\delta$  166.6, 166.5, 164.7, 141.2, 129.4, 125.5, 113.7, 110.3, 91.8, 76.4, 63.1, 61.8, 56.7, 41.6, 20.2, 14.2.

HRMS(ESI/Q-TOF): Exact mass calculated for  $[\text{C}_{16}\text{H}_{17}\text{NO}_7 + \text{Na}]^+$  requires  $m/z = 358.0897$ , found  $m/z = 358.0926$ .

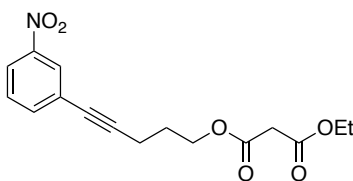

S13

**Ethyl (5-(3-nitrophenyl)pent-4-yn-1-yl) malonate (S13)** was synthesized from **S5** following **General Procedure 2**. Crude material was purified by silica chromatography (0→30→50% EtOAc/Hex) to provide the desired product as a yellow oil (2.1051 g, 89% yield).

**TLC** (40% EtOAc/Hex):  $R_f = 0.50$ .

**IR** (FT-ATR,  $\text{cm}^{-1}$ , neat):  $\nu_{\text{max}}$  2961, 2324, 1729, 1528, 1368, 1349, 1146, 1031, 761, 674.

**$^1\text{H NMR}$**  (400 MHz,  $\text{CDCl}_3$ )  $\delta$  8.22 (s, 1H), 8.17 – 8.08 (m, 1H), 7.68 (d,  $J = 7.7$  Hz, 1H), 7.46 (t,  $J = 8.0$  Hz, 1H), 4.32 (t,  $J = 6.2$  Hz, 2H), 4.21 (q,  $J = 7.1$  Hz, 2H), 3.40 (s, 2H), 2.55 (t,  $J = 7.0$  Hz, 2H), 1.98 (p,  $J = 6.7$  Hz, 2H), 1.29 (t,  $J = 7.1$  Hz, 3H).

**$^{13}\text{C NMR}$**  (101 MHz,  $\text{CDCl}_3$ )  $\delta$  166.7, 166.6, 148.2, 137.5, 129.4, 126.6, 125.6, 122.7, 91.6, 79.4, 64.1, 61.8, 48.4, 41.7, 27.6, 16.2, 14.2.

**HRMS** (ESI/Q-TOF): Exact mass calculated for  $[\text{C}_{16}\text{H}_{17}\text{NO}_6 + \text{H}]^+$  requires  $m/z = 320.1129$ , found  $m/z = 320.1132$ .

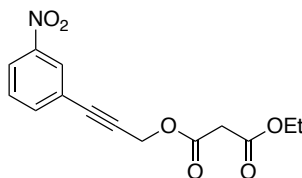

S14

**Ethyl (3-(3-nitrophenyl)prop-2-yn-1-yl) malonate (S14)** was synthesized from **S6** following **General Procedure 2**. The crude material was then purified by silica chromatography (0→30→50% EtOAc/Hex) followed by reversed-phase chromatography (0→95% MeCN/ $\text{H}_2\text{O}$ ) to provide the desired product as a clear oil (0.5711 g, 72% yield).

**TLC** (40% EtOAc/Hex):  $R_f = 0.64$ .

**IR** (FT-ATR,  $\text{cm}^{-1}$ , neat):  $\nu_{\text{max}}$  3084, 2964, 2324, 1754, 1731, 1529, 1370, 1350, 1140, 1029, 762, 735.

**$^1\text{H NMR}$**  (600 MHz,  $\text{CDCl}_3$ ):  $\delta$  8.32 – 8.29 (m, 1H), 8.20 (ddd,  $J = 8.3, 2.2, 0.9$  Hz, 1H), 7.75 (d,  $J = 7.7$  Hz, 1H), 7.52 (t,  $J = 8.0$  Hz, 1H), 4.99 (s, 2H), 4.23 (q,  $J = 7.1$  Hz, 2H), 3.47 (s, 2H), 1.29 (t,  $J = 7.1$  Hz, 3H).

**$^{13}\text{C NMR}$**  (151 MHz,  $\text{CDCl}_3$ ):  $\delta$  166.2, 166.0, 148.2, 137.6, 129.6, 126.9, 124.0, 123.8, 85.1, 84.5, 61.9, 53.4, 41.4, 14.2.

**HRMS** (ESI/Q-TOF): Exact mass calculated for  $[\text{C}_{14}\text{H}_{13}\text{NO}_6 + \text{H}]^+$  requires  $m/z = 292.0816$ , found  $m/z = 292.0844$ .

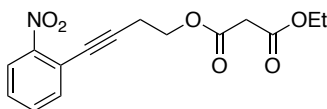

S15

**Ethyl (4-(2-nitrophenyl)but-3-yn-1-yl) malonate (S15)** was synthesized from **S7** following **General Procedure 2**. Crude material was purified by silica chromatography (0→25→40% EtOAc/Hex) to provide the desired product as a yellow oil (453.3 g, quantitative yield).

**TLC** (30% EtOAc/Hex):  $R_f = 0.54$ .

**IR** (FT-ATR,  $\text{cm}^{-1}$ , neat):  $\nu_{\text{max}}$  2982, 2119, 1730, 1609, 1524, 1369, 1340, 1144, 1030, 745.

**$^1\text{H}$  NMR** (400 MHz,  $\text{CDCl}_3$ )  $\delta$  7.99 (d,  $J = 8.2$  Hz, 1H), 7.56 (dt,  $J = 15.0, 7.7$  Hz, 2H), 7.43 (t,  $J = 7.7$  Hz, 1H), 4.37 (t,  $J = 6.7$  Hz, 2H), 4.20 (q,  $J = 7.1$  Hz, 2H), 3.44 (s, 2H), 2.85 (t,  $J = 6.7$  Hz, 2H), 1.26 (t,  $J = 7.1$  Hz, 3H).

**$^{13}\text{C}$  NMR** (101 MHz,  $\text{CDCl}_3$ )  $\delta$  166.6, 166.5, 150.3, 135.0, 132.8, 128.6, 124.6, 118.7, 93.9, 77.6, 62.9, 61.7, 41.6, 20.3, 14.2.

**HRMS** (ESI/Q-TOF): Exact mass calculated for  $[\text{C}_{15}\text{H}_{17}\text{NO}_6 + \text{H}]^+$  requires  $m/z = 306.0972$ , found  $m/z = 306.0976$ .

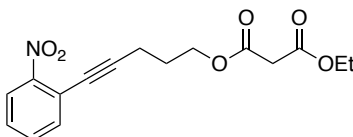

**S16**

**Ethyl (5-(2-nitrophenyl)pent-4-yn-1-yl) malonate (S16)** was synthesized from **S8** following **General Procedure 2**. Crude material was purified by silica chromatography (0→30→60% EtOAc/Hex) to provide the desired product as a yellow oil (0.3277 g, 92% yield).

**TLC** (30% EtOAc/Hex):  $R_f = 0.48$ .

**IR** (FT-ATR,  $\text{cm}^{-1}$ , neat):  $\nu_{\text{max}}$  2981, 2230, 1728, 1524, 1368, 1341, 1186, 1145, 1030, 745.

**$^1\text{H}$  NMR** (400 MHz,  $\text{CDCl}_3$ )  $\delta$  7.98 (d,  $J = 8.3$  Hz, 1H), 7.54 (dt,  $J = 15.0, 7.7$  Hz, 2H), 7.41 (t,  $J = 7.7$  Hz, 1H), 4.34 (t,  $J = 6.2$  Hz, 2H), 4.21 (q,  $J = 7.1$  Hz, 2H), 3.39 (s, 2H), 2.59 (t,  $J = 7.0$  Hz, 2H), 2.00 (p,  $J = 6.6$  Hz, 2H), 1.28 (t,  $J = 7.1$  Hz, 3H).

**$^{13}\text{C}$  NMR** (101 MHz,  $\text{CDCl}_3$ )  $\delta$  166.7, 166.7, 150.2, 134.9, 132.8, 128.3, 124.6, 119.0, 97.3, 76.9, 64.1, 61.7, 41.7, 27.5, 16.6, 14.2.

**HRMS** (ESI/Q-TOF): Exact mass calculated for  $[\text{C}_{16}\text{H}_{17}\text{NO}_6 + \text{H}]^+$  requires  $m/z = 342.0952$ , found  $m/z = 342.0948$ .

### 5.3 Hydrogenolysis Products: Bifunctional Nucleophiles

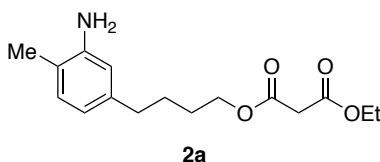

**2a**

**4-(3-amino-4-methylphenyl)butyl ethyl malonate (2a)** was synthesized from **S9** following **General Procedure 3**. The crude material was purified by flash chromatography (0→40% EtOAc/Hex) to yield the desired product as a pale yellow oil (1.1674 g, 98% yield).

**TLC** (40% EtOAc/Hex): 0.50.

**IR** (FT-ATR,  $\text{cm}^{-1}$ , neat):  $\nu_{\text{max}}$  3466, 3378, 2937, 2660, 2101, 1727, 1627, 1329, 1270, 1146, 1030, 734.

**$^1\text{H}$  NMR** (500 MHz,  $\text{CDCl}_3$ )  $\delta$  6.95 (d,  $J = 7.5$  Hz, 1H), 6.65 – 6.39 (m, 2H), 4.29 – 3.92 (m, 4H), 3.56 (s, 2H), 3.36 (s, 2H), 2.53 (t,  $J = 7.0$  Hz, 2H), 2.13 (s, 3H), 1.81 – 1.56 (m, 4H), 1.27 (t,  $J = 7.1$  Hz, 3H).

**$^{13}\text{C}$  NMR** (126 MHz,  $\text{CDCl}_3$ )  $\delta$  166.8, 166.7, 144.6, 140.9, 130.5, 120.0, 118.8, 115.1, 65.6, 61.7, 41.8, 35.1, 28.2, 27.6, 17.1, 14.2.

**HRMS** (ESI/Q-TOF): Exact mass calculated for  $[\text{C}_{16}\text{H}_{23}\text{NO}_4 + \text{H}]^+$  requires  $m/z = 294.1700$ , found  $m/z = 294.1697$ .

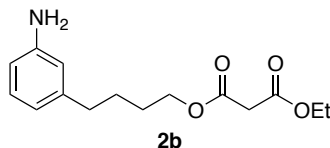

**4-(3-aminophenyl)butyl ethyl malonate (2b)** was synthesized from **S10** following **General Procedure 3**. The crude material was purified by flash chromatography (0→30→50% EtOAc/Hex) to provide the desired product as a pale yellow oil (2.2495 g, 90% yield).

**TLC** (40% EtOAc/Hex):  $R_f = 0.50$ .

**IR** (FT-ATR,  $\text{cm}^{-1}$ , neat): 3467, 3376, 2941, 2860, 1725, 1622, 1331, 1268, 1148, 1030, 866., 734.

**$^1\text{H}$  NMR** (600 MHz,  $\text{CDCl}_3$ ):  $\delta$  7.06 (t,  $J = 7.6$  Hz, 1H), 6.58 (d,  $J = 7.5$  Hz, 1H), 6.53 (d,  $J = 7.6$  Hz, 2H), 4.27 – 3.96 (m, 4H), 3.69 (s, 1H), 3.36 (s, 2H), 2.55 (t,  $J = 7.0$  Hz, 2H), 1.67 (dd,  $J = 6.6, 3.1$  Hz, 6H), 1.27 (t,  $J = 7.1$  Hz, 3H).

**$^{13}\text{C}$  NMR** (151 MHz,  $\text{CDCl}_3$ ):  $\delta$  166.8, 166.7, 146.4, 143.3, 129.4, 119.0, 115.4, 113.0, 65.6, 61.7, 41.8, 35.5, 28.2, 27.5, 14.2.

**HRMS** (ESI/Q-TOF): Exact mass calculated for  $[\text{C}_{15}\text{H}_{21}\text{NO}_4 + \text{H}]^+$  requires  $m/z = 280.1549$ , found  $m/z = 280.1561$ .

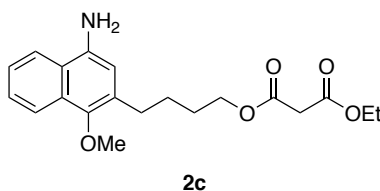

**4-(4-amino-1-methoxynaphthalen-2-yl)butyl ethyl malonate (2c)** was synthesized from **S11** following **General Procedure 3**. The crude material was purified by flash chromatography (0→50→70% EtOAc/Hex) to yield **2c** as a purple oil (1.6614 g, quantitative yield).

**TLC** (50% EtOAc/Hex):  $R_f = 0.57$ .

**IR** (FT-ATR,  $\text{cm}^{-1}$ , neat):  $\nu_{\text{max}}$  3444, 3367, 2936, 2864, 2108, 1981, 1725, 1628, 1464, 1382, 1370, 1228, 1148, 1030, 764, 708.

**$^1\text{H}$  NMR** (600 MHz,  $\text{CDCl}_3$ )  $\delta$  8.05 (d,  $J = 8.4$  Hz, 1H), 7.81 (d,  $J = 8.4$  Hz, 1H), 7.50 (t,  $J = 7.6$  Hz, 1H), 7.44 (t,  $J = 7.6$  Hz, 1H), 6.66 (s, 1H), 4.24 – 4.13 (m, 4H), 3.85 (s, 3H), 3.36 (s, 2H), 2.78 – 2.73 (m, 2H), 1.74 (p,  $J = 3.5$  Hz, 4H), 1.25 (t,  $J = 7.1$  Hz, 3H).

$^{13}\text{C}$  NMR (151 MHz,  $\text{CDCl}_3$ ):  $\delta$  166.8, 166.7, 146.8, 137.7, 130.4, 128.7, 126.1, 124.8, 124.0, 122.7, 121.4, 112.0, 77.2, 65.5, 62.2, 61.7, 41.8, 29.2, 28.4, 27.0, 14.2.

HRMS (ESI/Q-TOF): Exact mass calculated for  $[\text{C}_{20}\text{H}_{25}\text{NO}_5 + \text{H}]^+$  requires  $m/z = 360.1806$ , found  $m/z = 360.1810$ .

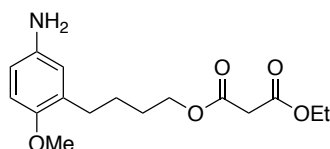

2d

**4-(5-amino-2-methoxyphenyl)butyl ethyl malonate (2d)** was synthesized from **S12** following **General Procedure 3**. The crude material was purified by flash chromatography (0 $\rightarrow$ 45 $\rightarrow$ 70 % EtOAc/Hex) to yield **2d** as a red-brown oil (1.2556 g, 93% yield).

TLC (40% EtOAc/Hex):  $R_f = 0.41$ .

IR (FT-ATR,  $\text{cm}^{-1}$ , neat):  $\nu_{\text{max}}$  3442, 3365, 2943, 2832, 2114, 1726, 1501, 1369, 1229, 1146, 1029, 855.

$^1\text{H}$  NMR (600 MHz,  $\text{CDCl}_3$ ):  $\delta$  6.69 – 6.65 (m, 1H), 6.51 (d,  $J = 6.4$  Hz, 2H), 4.19 (dt,  $J = 20.8, 6.9$  Hz, 4H), 3.74 (s, 3H), 3.43 – 3.34 (m, 4H), 2.56 (t,  $J = 7.4$  Hz, 2H), 1.66 (dp,  $J = 31.5, 8.4, 7.7$  Hz, 4H), 1.27 (t,  $J = 7.1$  Hz, 3H).

$^{13}\text{C}$  NMR (126 MHz,  $\text{CDCl}_3$ ): 166.9, 166.8, 151.0, 139.8, 131.5, 117.8, 113.6, 111.9, 65.7, 61.7, 56.1, 41.9, 29.7, 28.3, 26.2, 14.2.

HRMS (ESI/Q-TOF): Exact mass calculated for  $[\text{C}_{16}\text{H}_{23}\text{NO}_5 + \text{H}]^+$  requires  $m/z = 310.1649$ , found  $m/z = 310.1678$ .

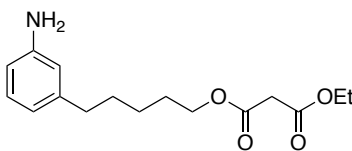

2e

**5-(3-aminophenyl)pentyl ethyl malonate (2e)** was synthesized from **S13** following **General Procedure 3**. The crude material was purified by silica chromatography (0 $\rightarrow$ 40% EtOAc/Hex) to yield **2e** as an orange-yellow oil (1.6596 g, 94% yield).

TLC (40% EtOAc/Hex):  $R_f = 0.50$ .

IR (FT-ATR,  $\text{cm}^{-1}$ , neat):  $\nu_{\text{max}}$  3467, 3376, 2936, 2857, 1723, 1622, 1330, 1272, 1148, 1031, 955.

$^1\text{H}$  NMR (600 MHz,  $\text{CDCl}_3$ )  $\delta$  7.07 (t,  $J = 7.9$  Hz, 1H), 6.59 (d,  $J = 7.5$  Hz, 1H), 6.54 (d,  $J = 7.0$  Hz, 2H), 4.20 (q,  $J = 7.1$  Hz, 2H), 4.14 (t,  $J = 6.7$  Hz, 2H), 3.72 (brs, 2H), 3.36 (s, 2H), 2.60 – 2.45 (m, 2H), 1.76 – 1.56 (m, 4H), 1.46 – 1.34 (m, 2H), 1.28 (t,  $J = 7.1$  Hz, 3H).

$^{13}\text{C}$  NMR (151 MHz,  $\text{CDCl}_3$ )  $\delta$  166.8, 166.7, 146.1, 143.8, 129.3, 119.2, 115.6, 113.0, 65.7, 61.6, 41.8, 35.9, 30.9, 28.5, 25.6, 14.2.

HRMS (ESI/Q-TOF): Exact mass calculated for  $[\text{C}_{20}\text{H}_{25}\text{NO}_5 + \text{H}]^+$  requires  $m/z = 294.1700$ , found  $m/z = 294.1689$ .

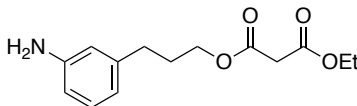

S17

**3-(3-aminophenyl)propyl ethyl malonate (S17)** was synthesized from **S14** following **General Procedure 3**. The crude material was purified by flash chromatography (0 $\rightarrow$ 20 $\rightarrow$ 40% EtOAc/Hex) to yield the **S17** as an orange oil (0.1053 g, 38% yield).

TLC (40% EtOAc/Hex):  $R_f = 0.38$ .

IR (FT-ATR,  $\text{cm}^{-1}$ , neat):  $\nu_{\text{max}}$  3467, 3376, 2981, 2348, 1724, 1623, 1604, 1330, 1271, 1148, 1028, 911.

$^1\text{H}$  NMR (400 MHz,  $\text{CDCl}_3$ )  $\delta$  7.07 (t,  $J = 7.7$  Hz, 1H), 6.58 (d,  $J = 7.4$  Hz, 1H), 6.53 (d,  $J = 7.6$  Hz, 2H), 4.21 (q,  $J = 7.1$  Hz, 2H), 4.16 (t,  $J = 6.5$  Hz, 2H), 3.87 (brs, 2H), 3.38 (s, 2H), 2.66–2.38 (m, 2H), 2.05–1.86 (m, 2H), 1.29 (t,  $J = 7.1$  Hz, 3H).

$^{13}\text{C}$  NMR (101 MHz,  $\text{CDCl}_3$ )  $\delta$  166.8, 166.7, 146.5, 142.4, 129.5, 118.9, 115.4, 113.1, 65.0, 61.7, 41.8, 32.1, 30.0, 14.2.

HRMS (ESI/Q-TOF): Exact mass calculated for  $[\text{C}_{14}\text{H}_{19}\text{NO}_4 + \text{H}]^+$  requires  $m/z = 266.1388$ , found  $m/z = 266.1387$ .

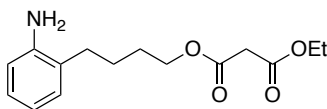

S18

**4-(2-aminophenyl)butyl ethyl malonate (S18)** was synthesized from **S15** following **General Procedure 3**. The crude material was purified by flash chromatography (0 $\rightarrow$ 40 $\rightarrow$ 75% EtOAc/Hex) to yield **S4** as a pale yellow oil (0.1119 g, 89% yield).

TLC (40% EtOAc/Hex):  $R_f = 0.59$ .

IR (FT-ATR,  $\text{cm}^{-1}$ , neat):  $\nu_{\text{max}}$  3470, 3378, 2940, 2865, 2101, 1725, 1625, 1497, 1330, 1271, 1147, 1030, 749.

$^1\text{H}$  NMR (400 MHz,  $\text{CDCl}_3$ )  $\delta$  7.08 – 6.99 (m, 2H), 6.73 (t,  $J = 7.4$  Hz, 1H), 6.68 (d,  $J = 7.8$  Hz, 1H), 4.26 – 4.07 (m, 4H), 3.37 (s, 2H), 2.53 (t,  $J = 7.3$  Hz, 2H), 1.90 – 1.62 (m, 6H), 1.27 (t,  $J = 7.1$  Hz, 3H).

$^{13}\text{C}$  NMR (101 MHz,  $\text{CDCl}_3$ )  $\delta$  166.9, 166.7, 144.2, 129.6, 127.2, 126.1, 118.9, 115.8, 77.2, 65.4, 61.7, 41.8, 30.9, 28.5, 25.0, 14.2.

HRMS (ESI/Q-TOF): Exact mass calculated for  $[\text{C}_{15}\text{H}_{21}\text{NO}_4 + \text{H}]^+$  requires  $m/z = 280.1542$ , found  $m/z = 280.1543$ .



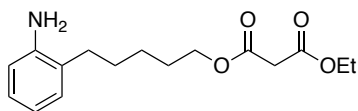

S19

**5-(2-aminophenyl)pentyl ethyl malonate (S19)** was synthesized from **S16** following **General Procedure 3**. The crude material was purified by flash chromatography (0→35→70% EtOAc/Hex) to yield **S19** as an orange oil (0.2561 g, 82% yield).

**TLC** (40% EtOAc/Hex):  $R_f$  = 0.61.

**IR** (FT-ATR,  $\text{cm}^{-1}$ , neat):  $\nu_{\text{max}}$  3466, 3380, 2935, 2860, 2113, 1725, 1624, 1497, 1330, 1269, 1147, 1031, 749.

**$^1\text{H NMR}$**  (400 MHz,  $\text{CDCl}_3$ )  $\delta$  7.02 (d,  $J$  = 7.4 Hz, 2H), 6.77 – 6.61 (m, 2H), 4.31 – 4.06 (m, 4H), 3.69 (d,  $J$  = 10.3 Hz, 1H), 3.37 (s, 2H), 2.71 – 2.43 (m, 2H), 1.86 – 1.61 (m, 6H), 1.45 (p,  $J$  = 7.5 Hz, 3H), 1.28 (t,  $J$  = 7.1 Hz, 3H).

**$^{13}\text{C NMR}$**  (126 MHz,  $\text{CDCl}_3$ )  $\delta$  166.8, 166.7, 144.1, 129.6, 127.1, 126.6, 119.0, 115.8, 65.6, 61.7, 41.8, 31.3, 28.5, 28.4, 25.9, 14.2.

**HRMS** (ESI/Q-TOF): Exact mass calculated for  $[\text{C}_{16}\text{H}_{23}\text{NO}_4 + \text{H}]^+$  requires  $m/z$  = 294.1696, found  $m/z$  = 294.1700.

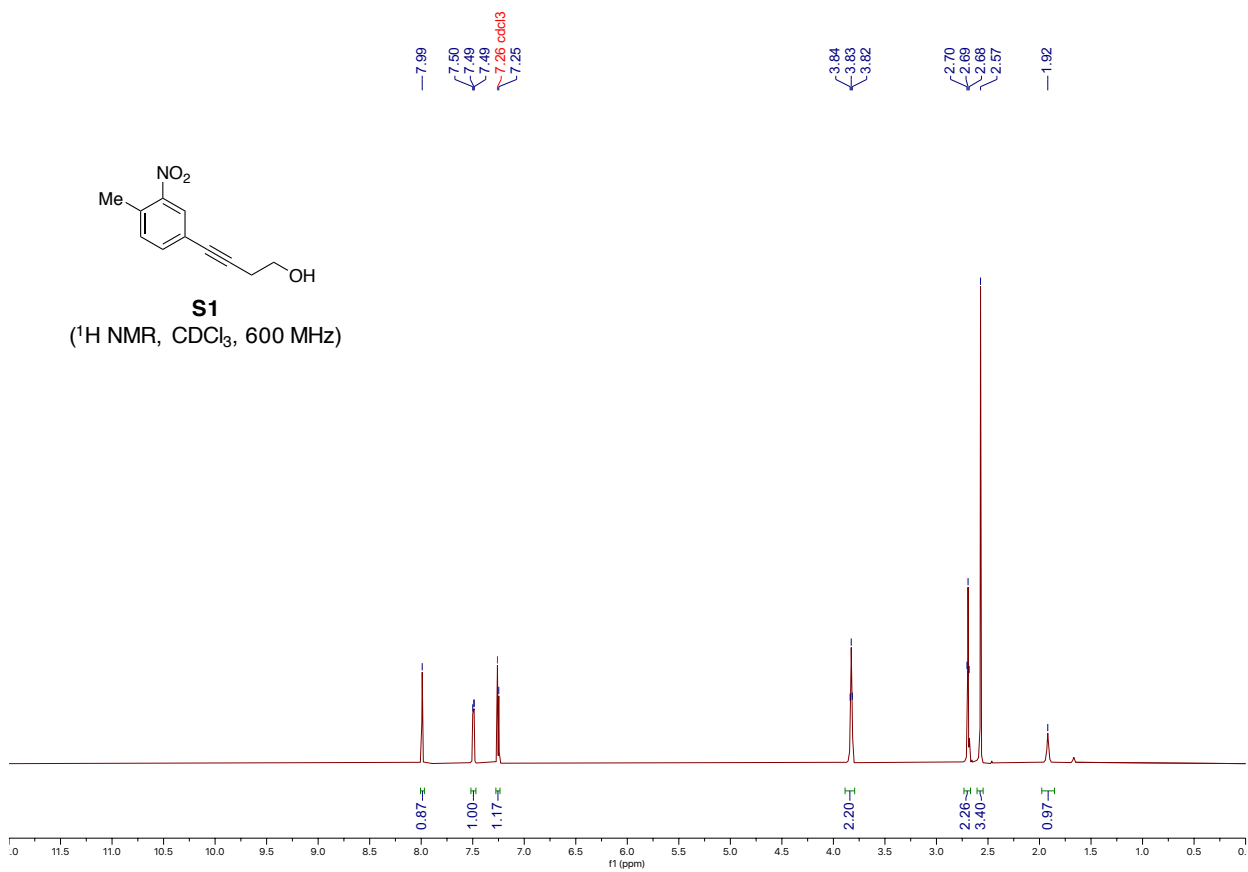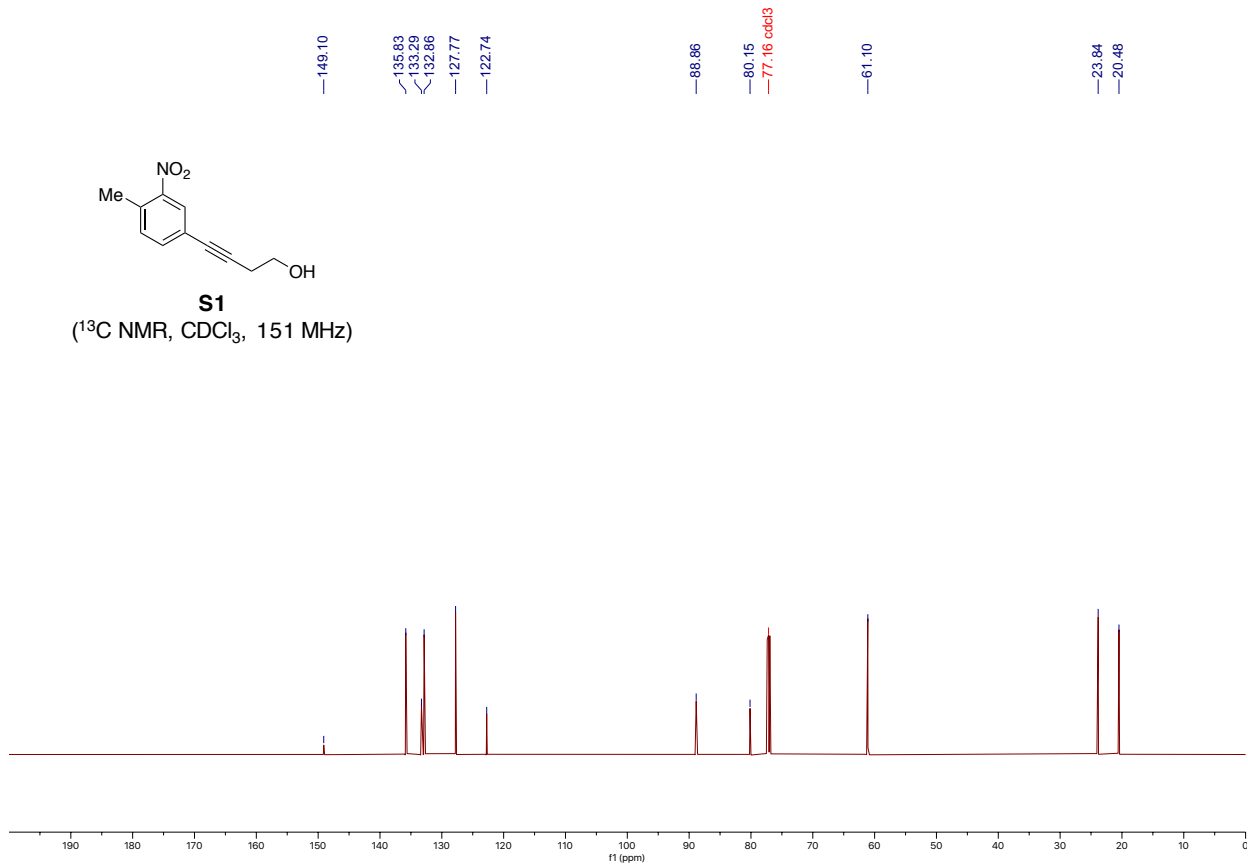

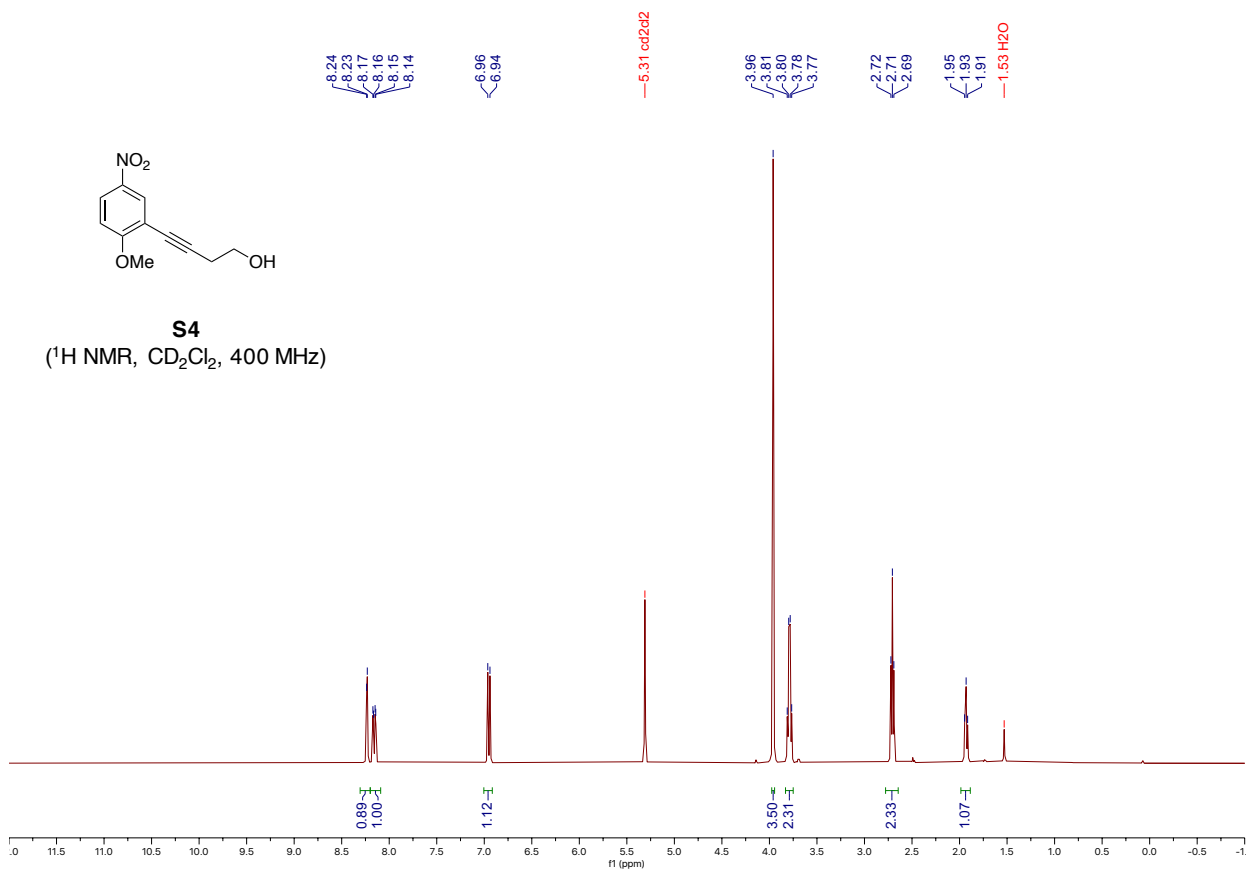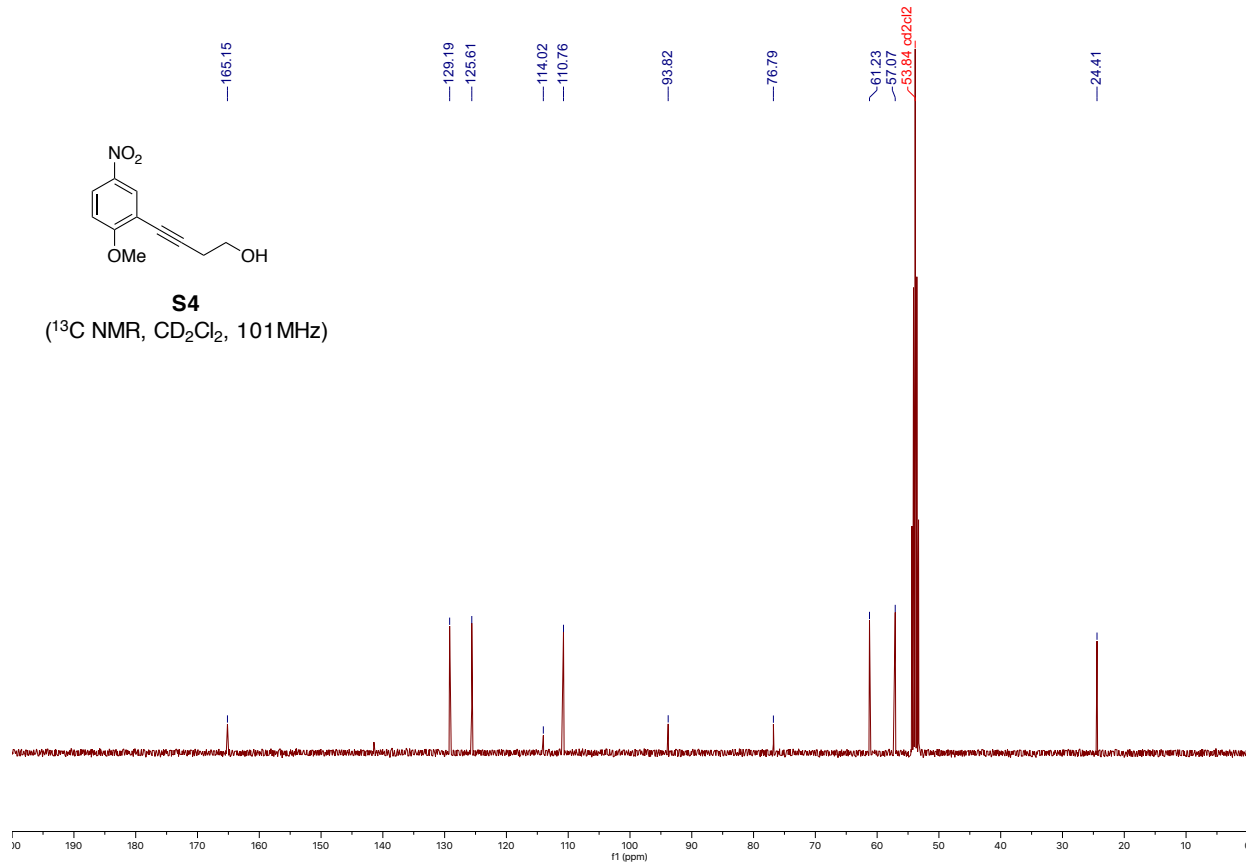

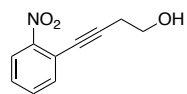

**S7**  
(<sup>1</sup>H NMR, CDCl<sub>3</sub>, 400 MHz)

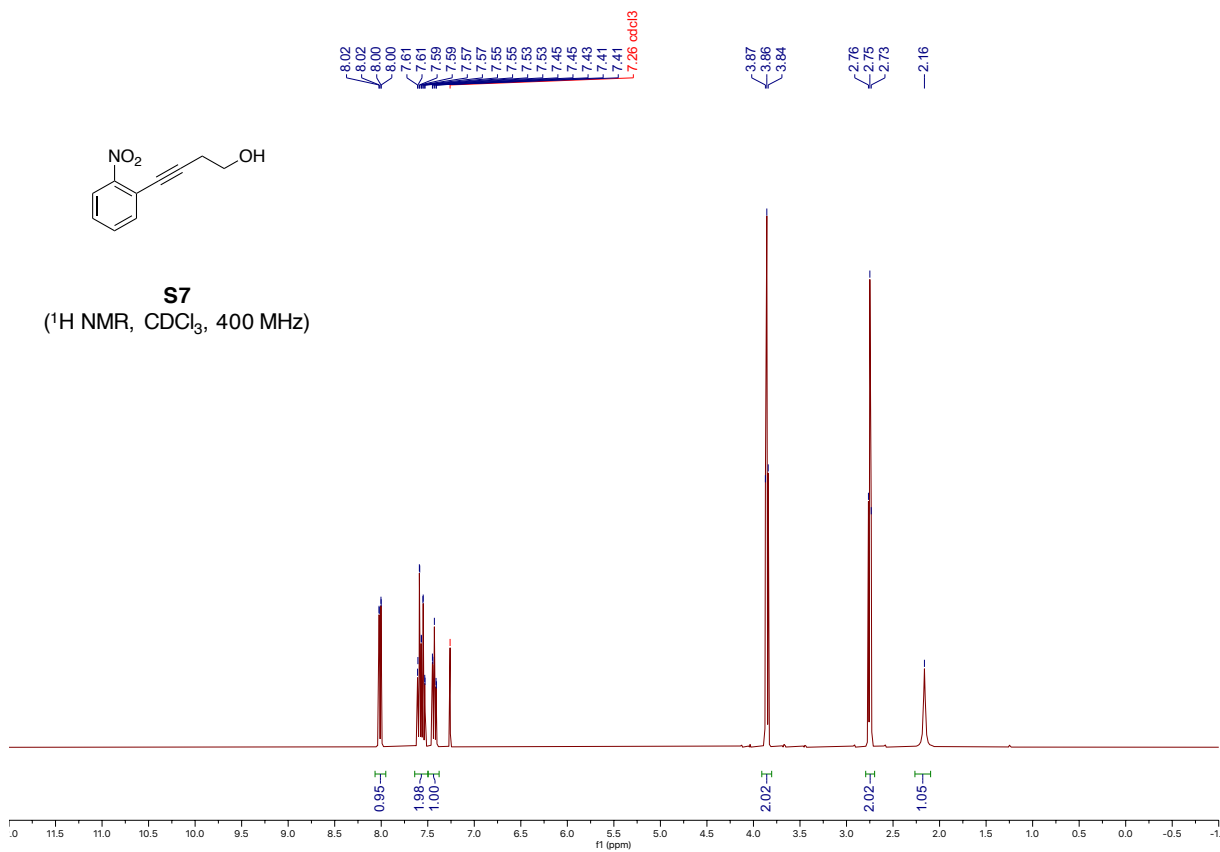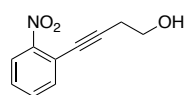

**S7**  
(<sup>13</sup>C NMR, CDCl<sub>3</sub>, 101 MHz)

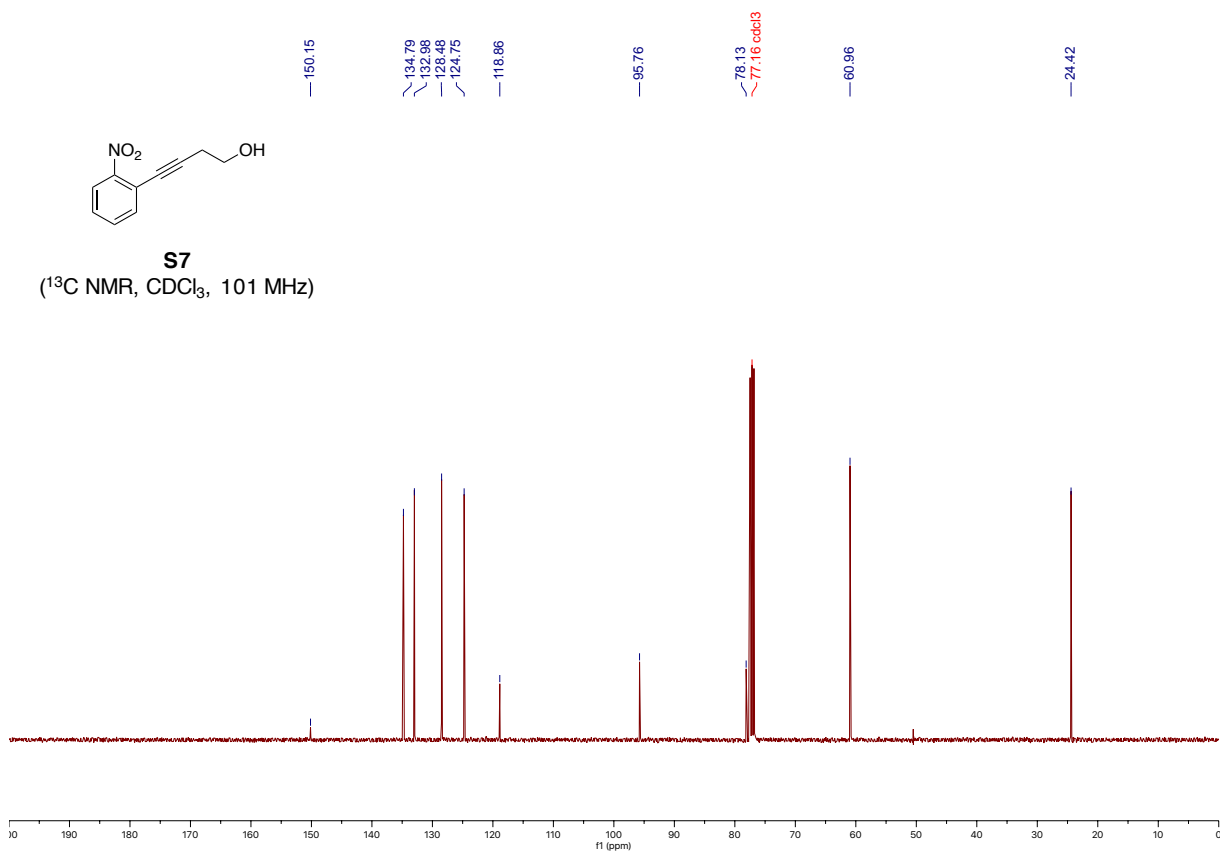

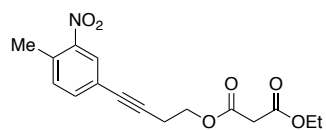

**S9**  
( $^1\text{H}$  NMR,  $\text{CDCl}_3$ , 600 MHz)

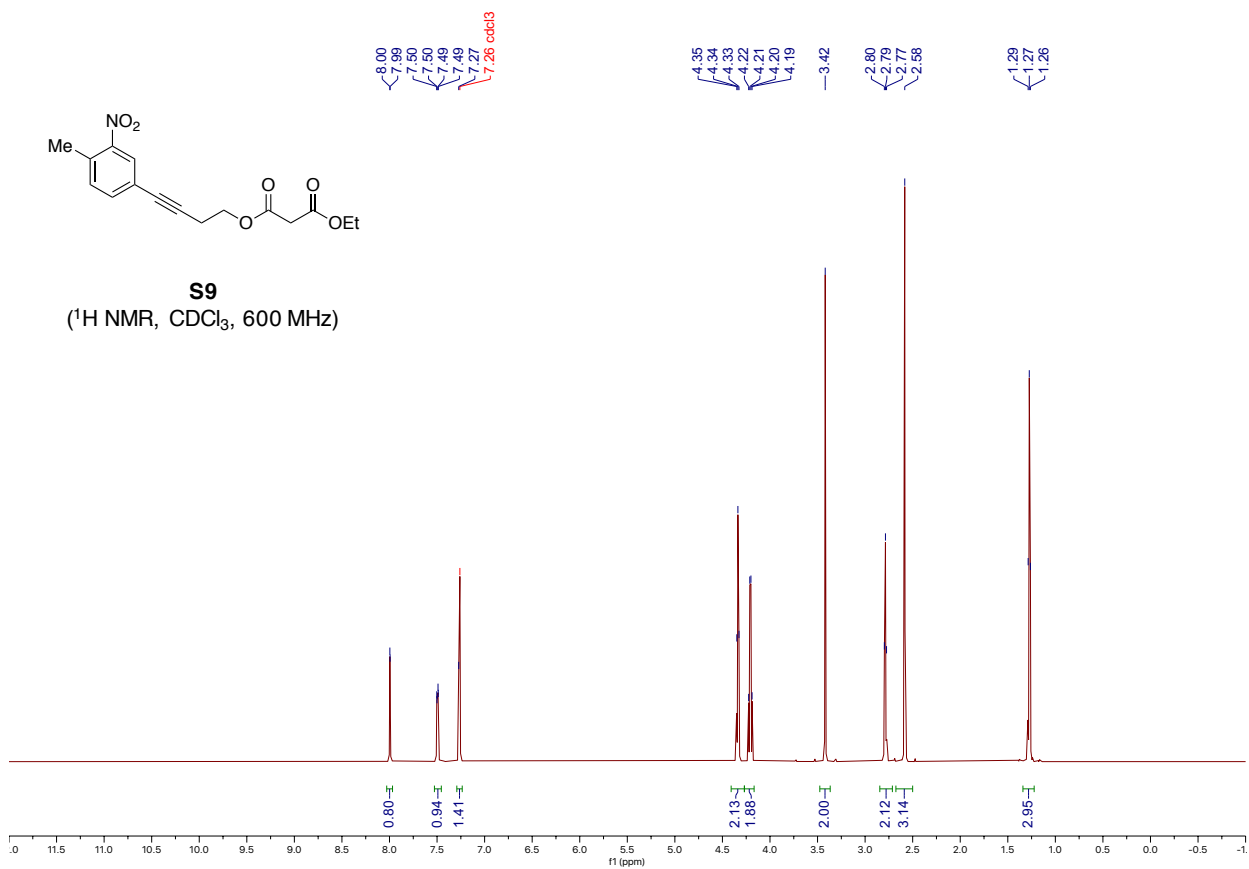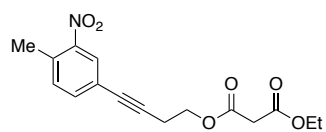

**S9**  
( $^{13}\text{C}$  NMR,  $\text{CDCl}_3$ , 151 MHz)

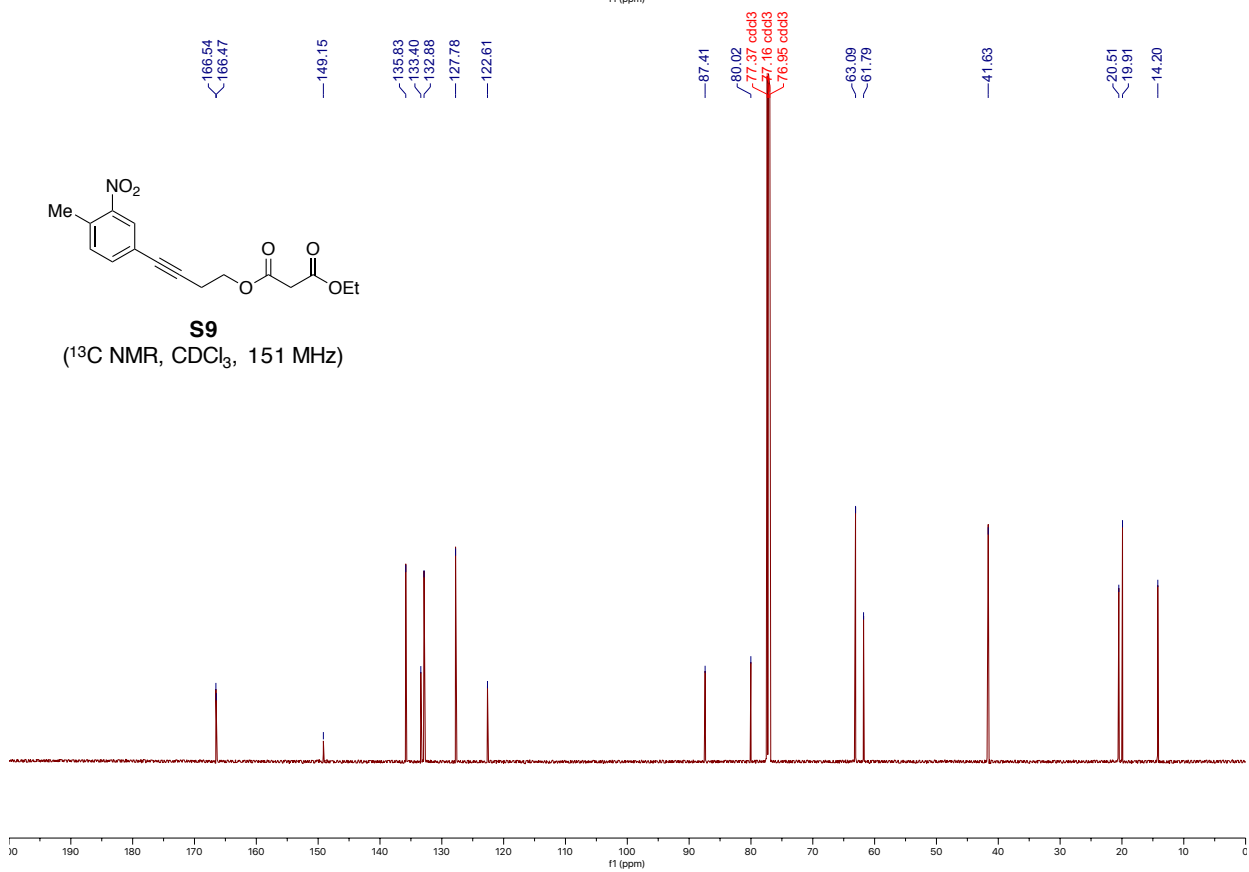

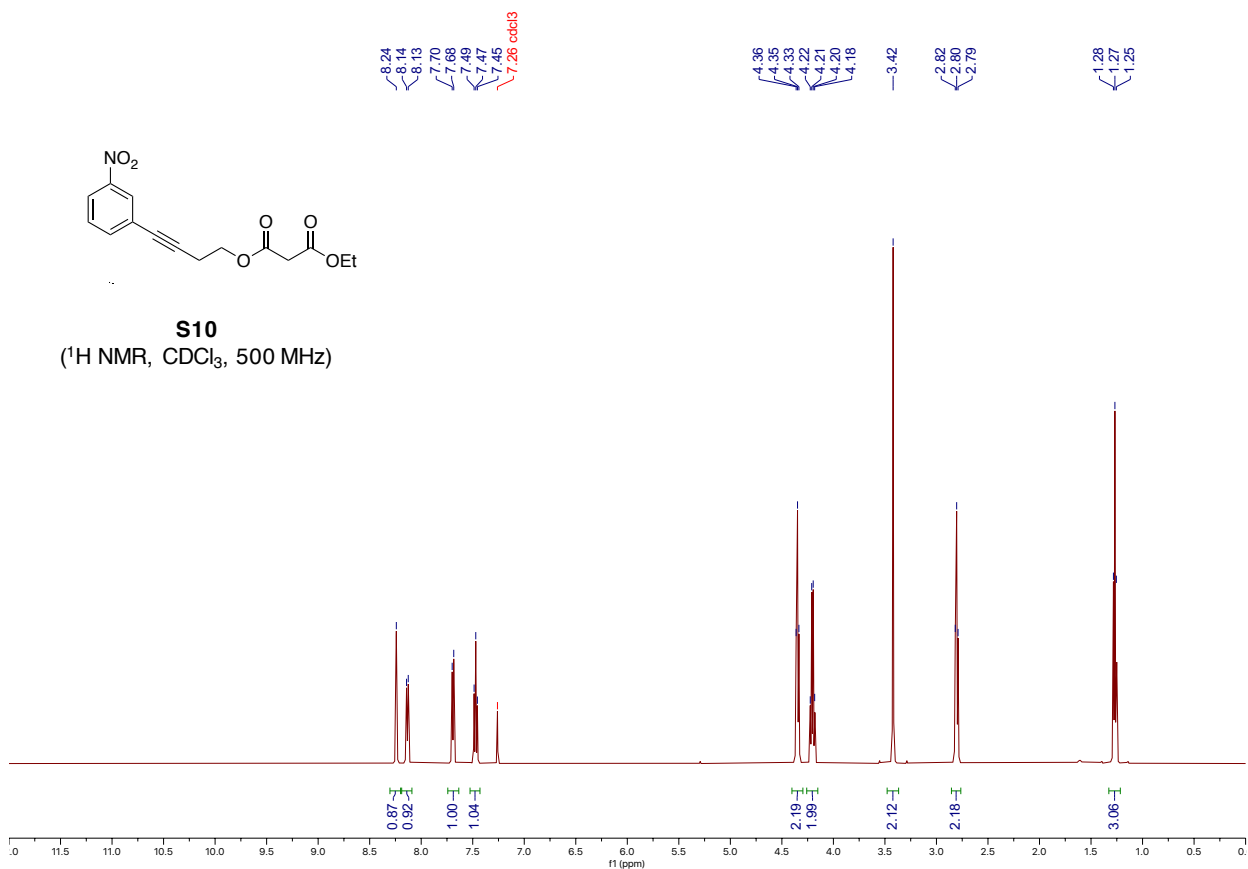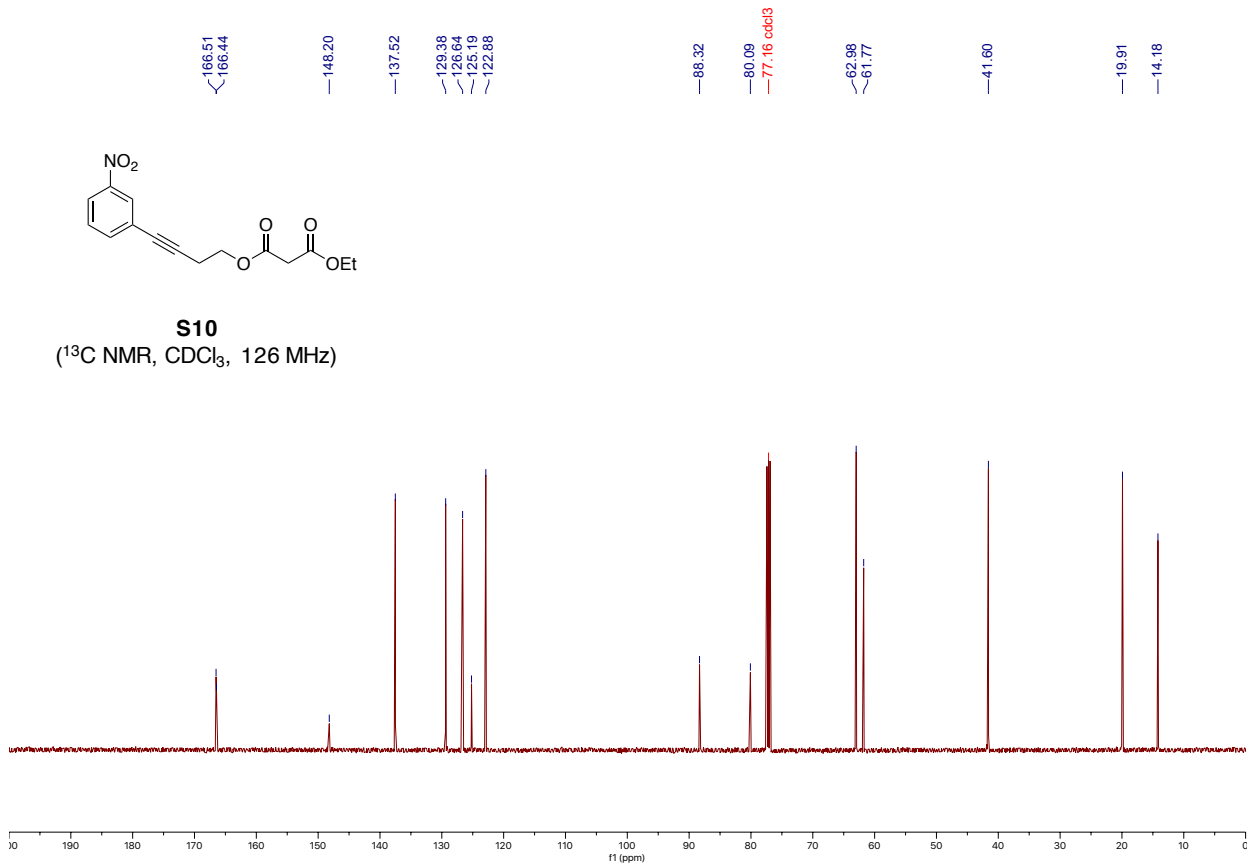

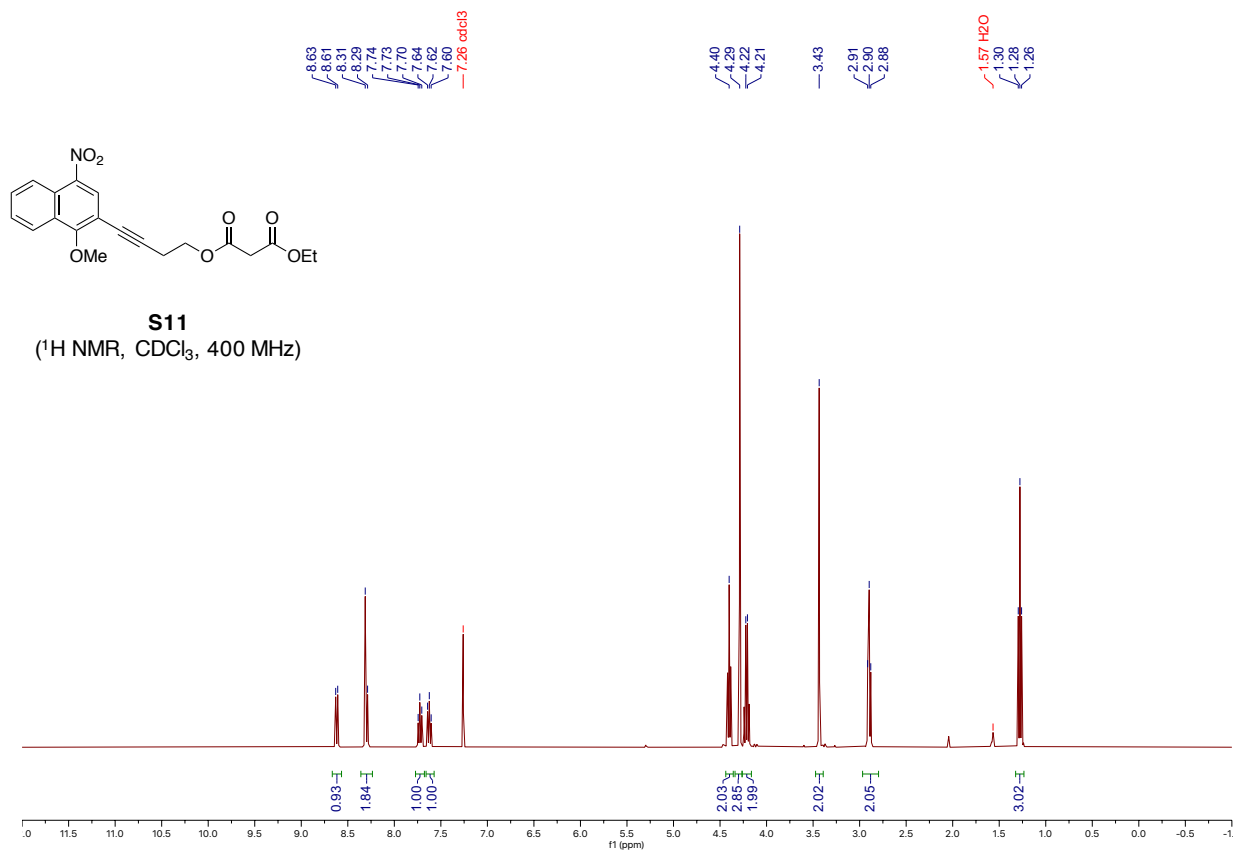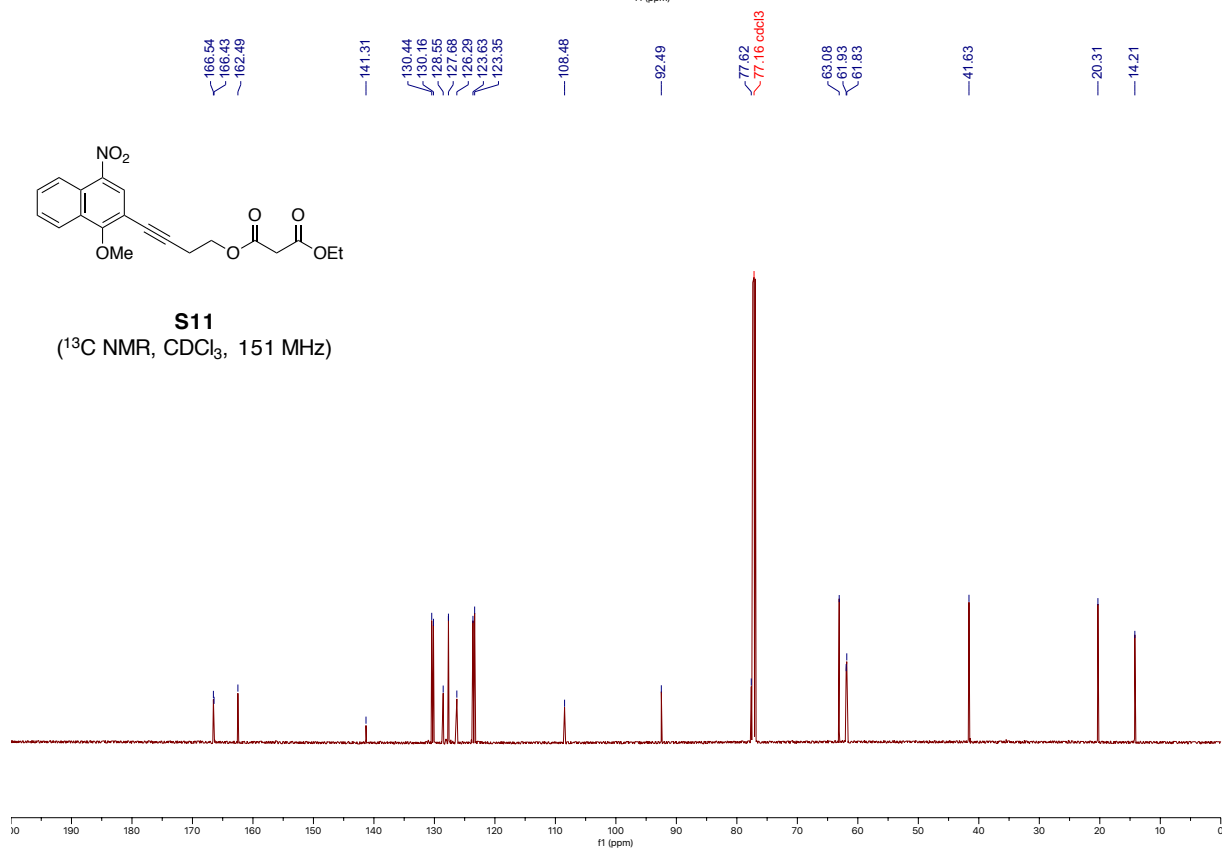

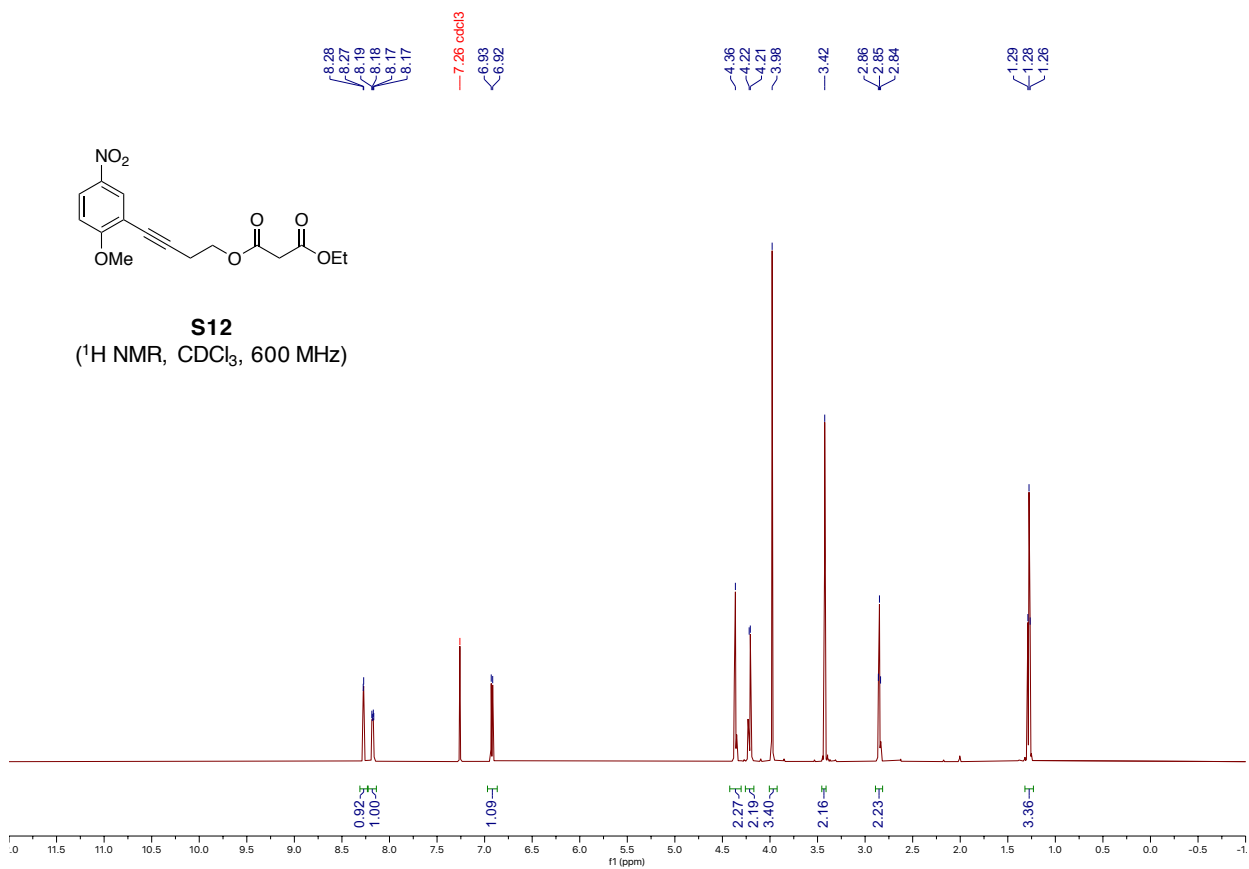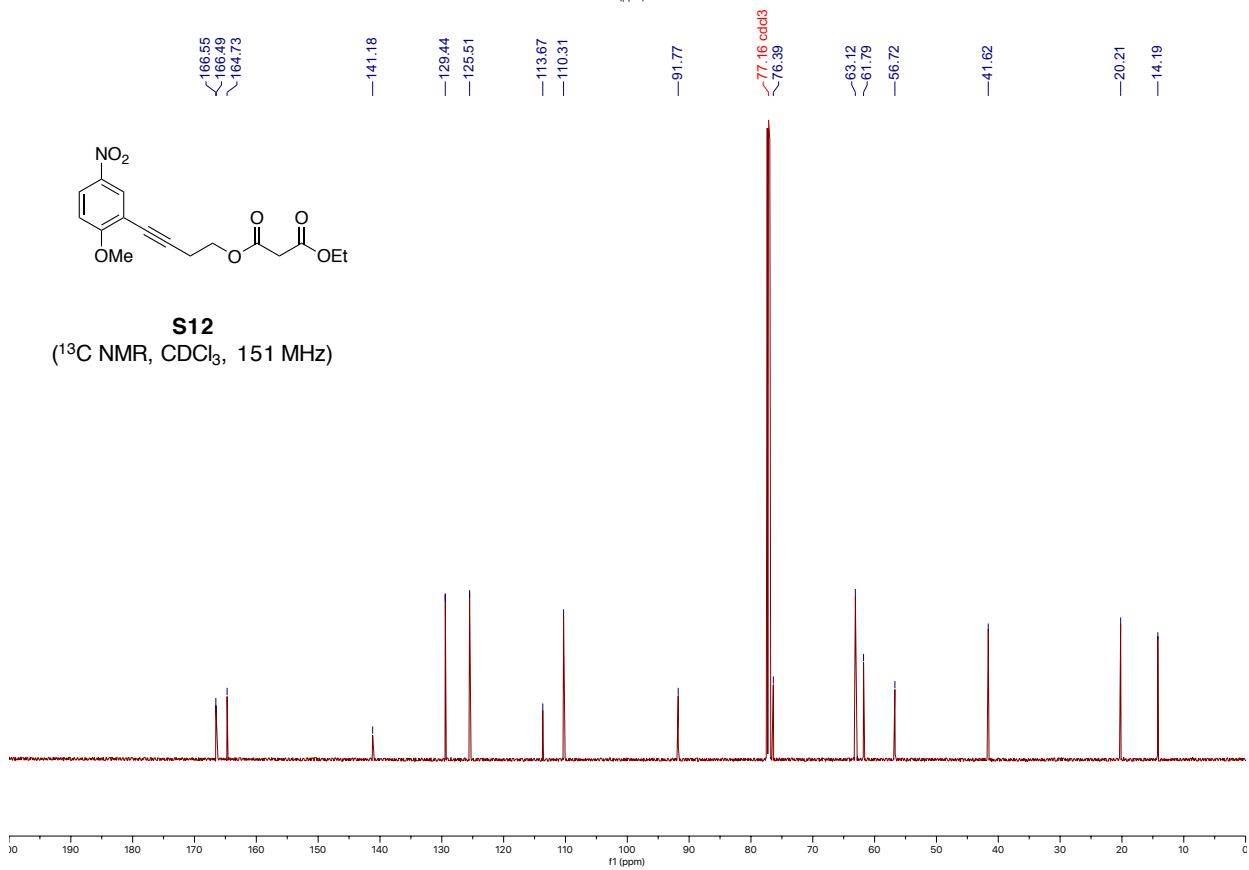



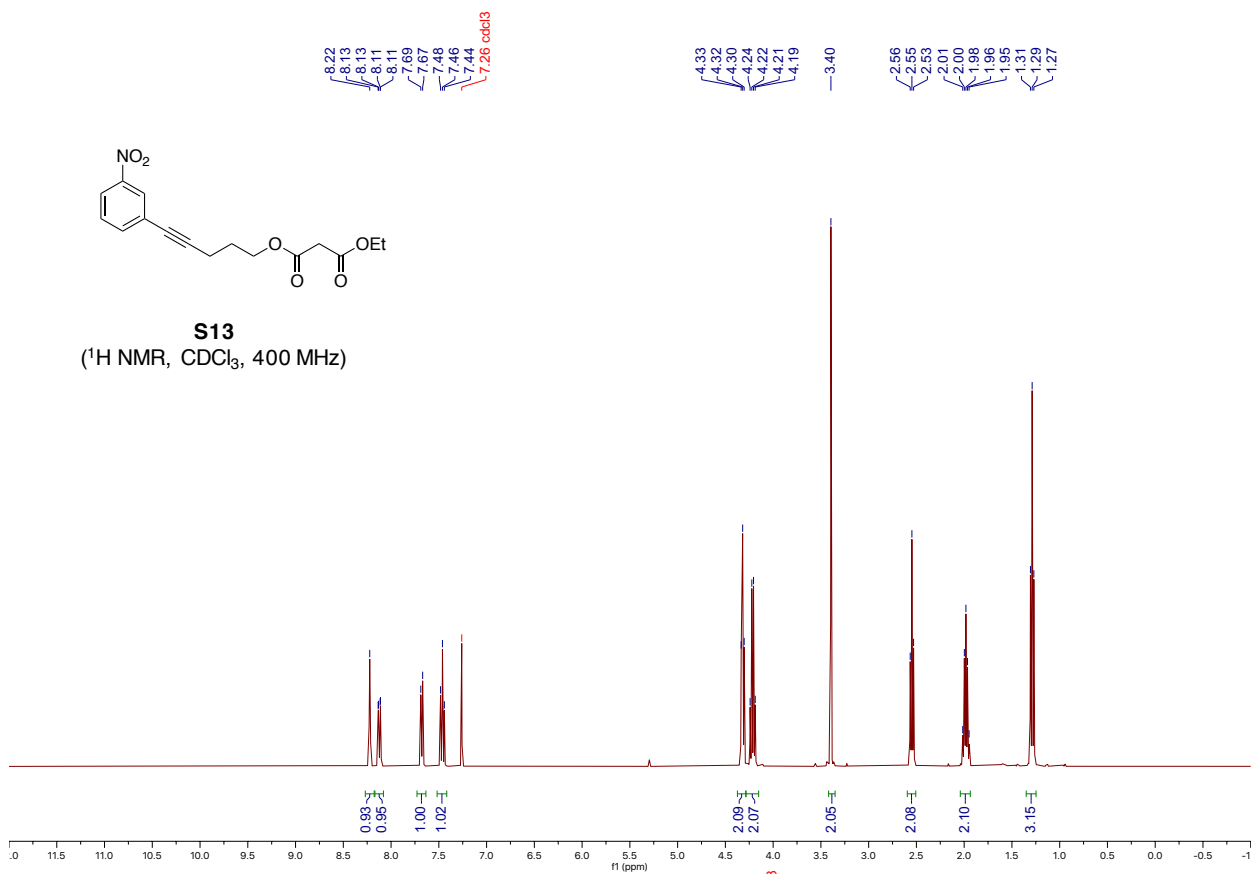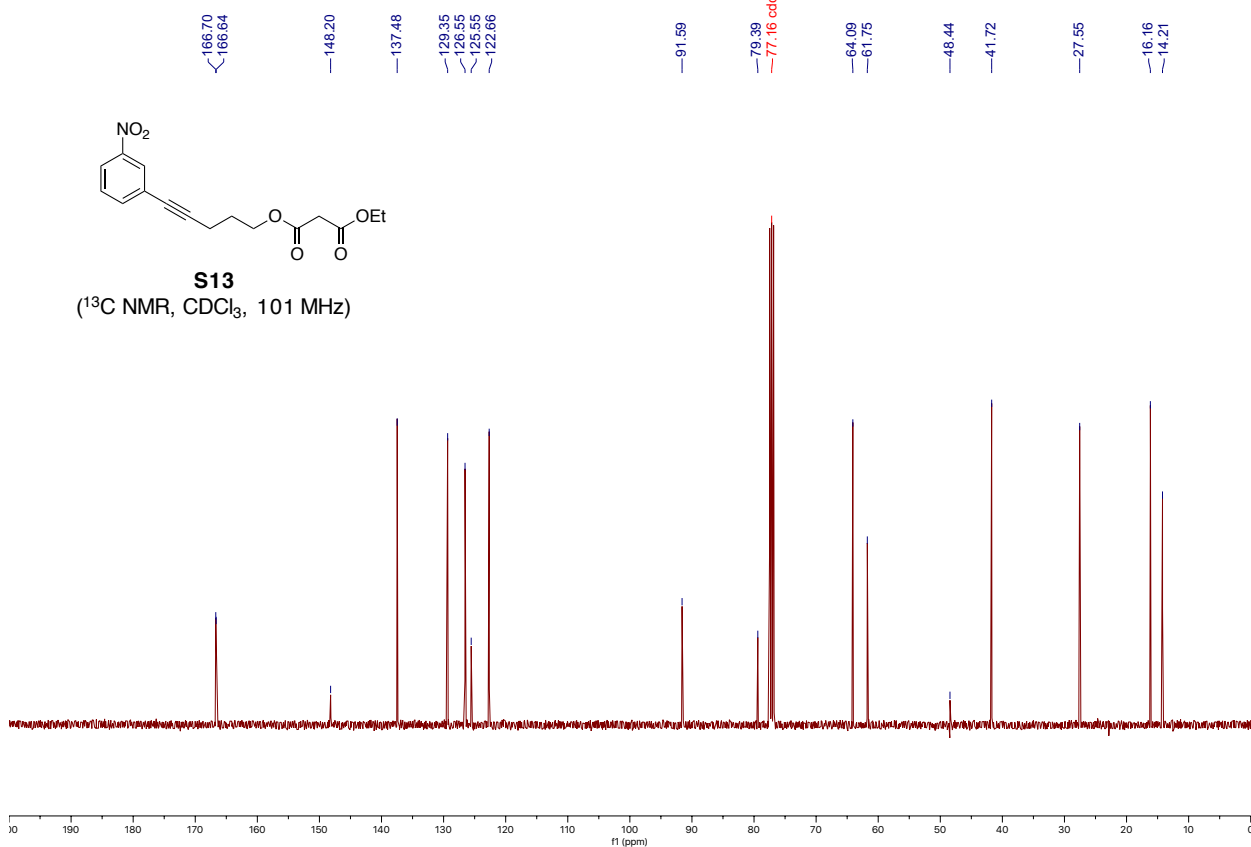

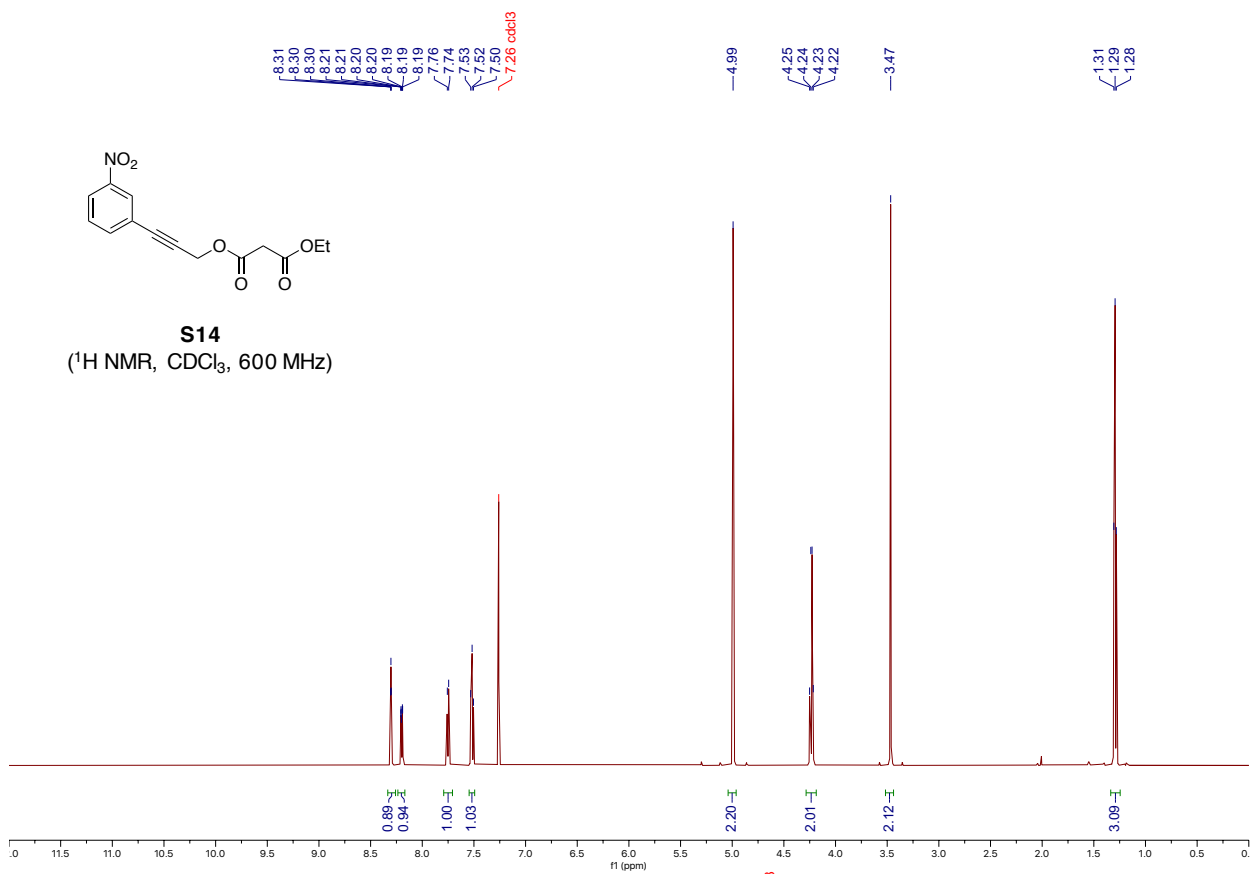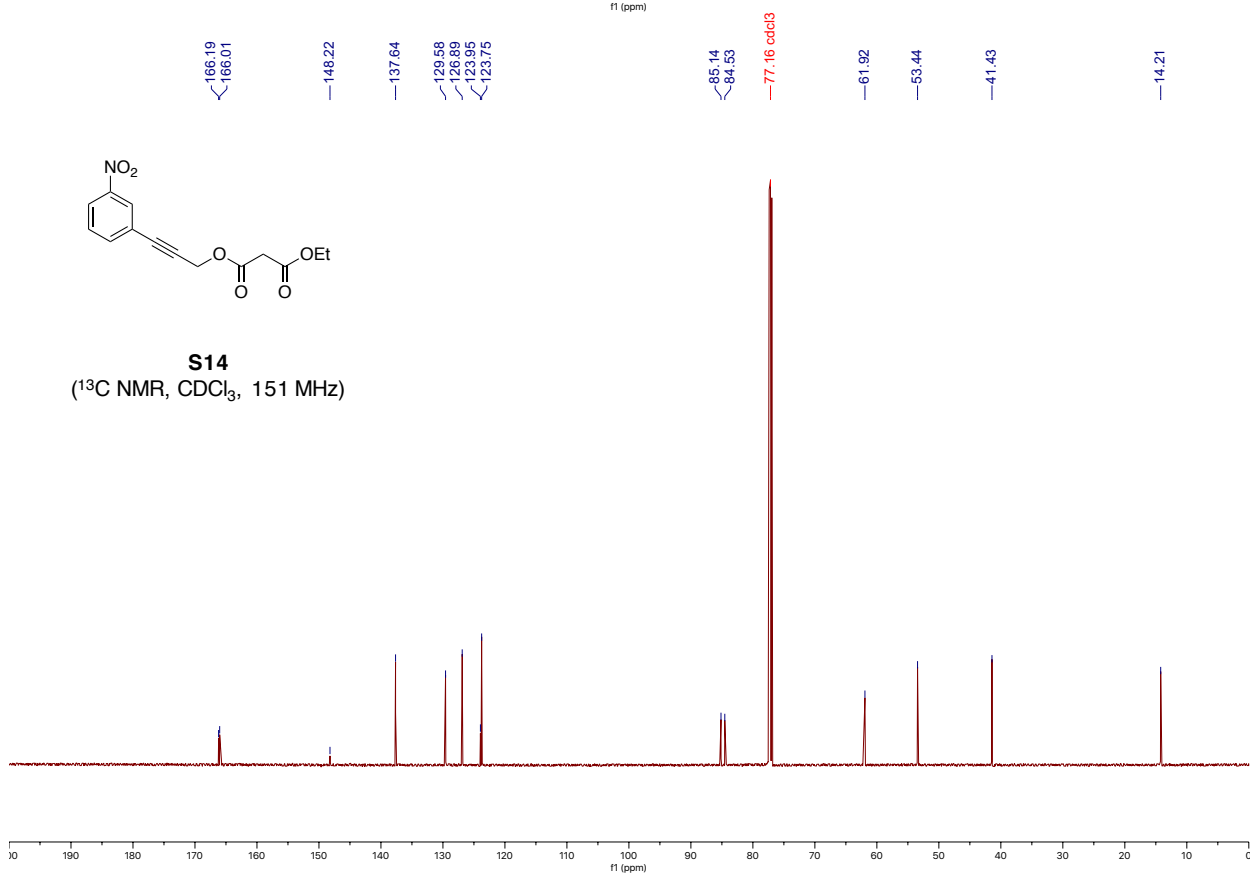

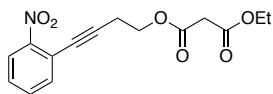

**S15**  
(<sup>1</sup>H NMR, CDCl<sub>3</sub>, 400 MHz)

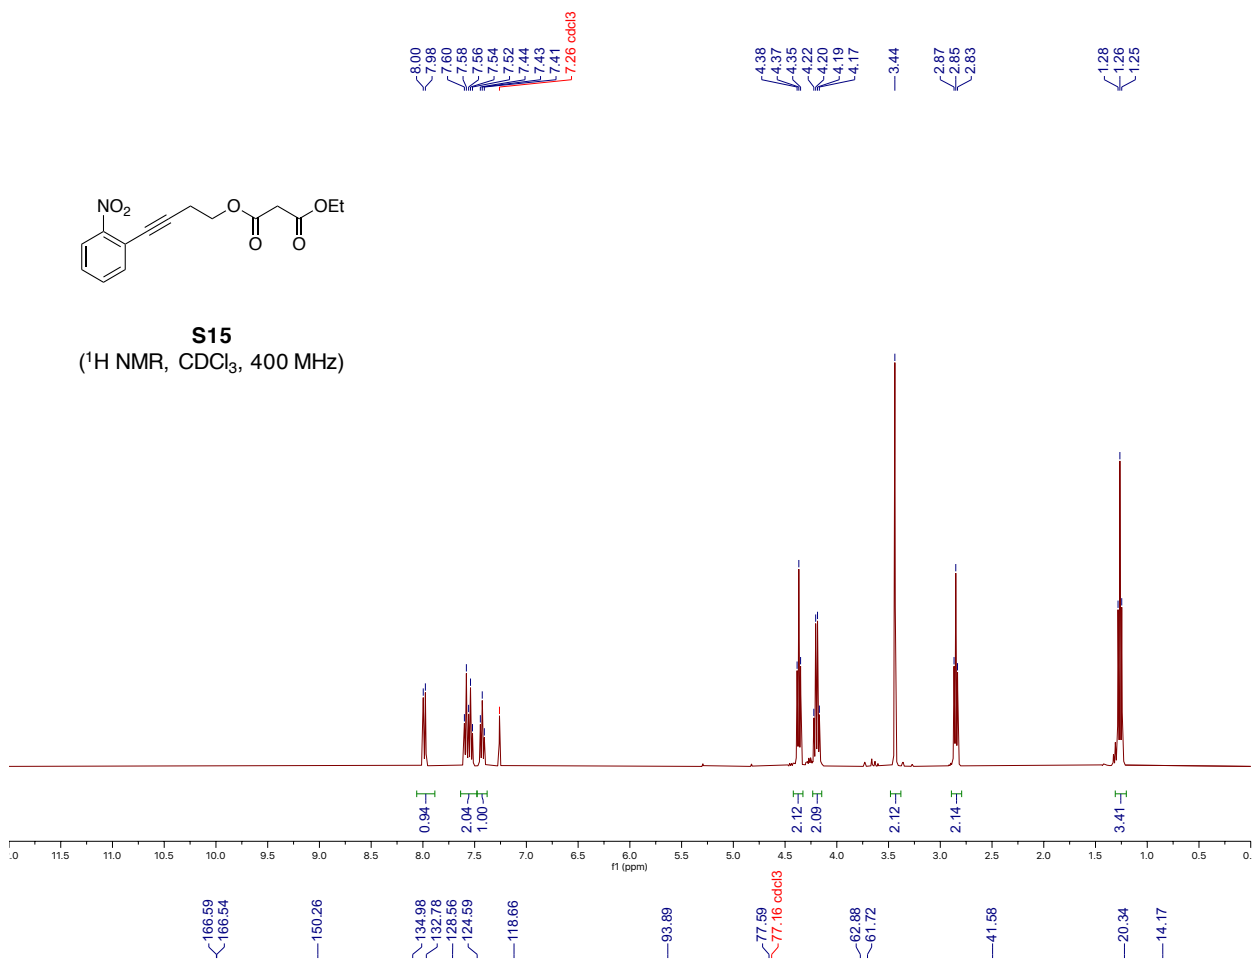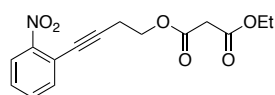

**S15**  
(<sup>13</sup>C NMR, CDCl<sub>3</sub>, 101 MHz)

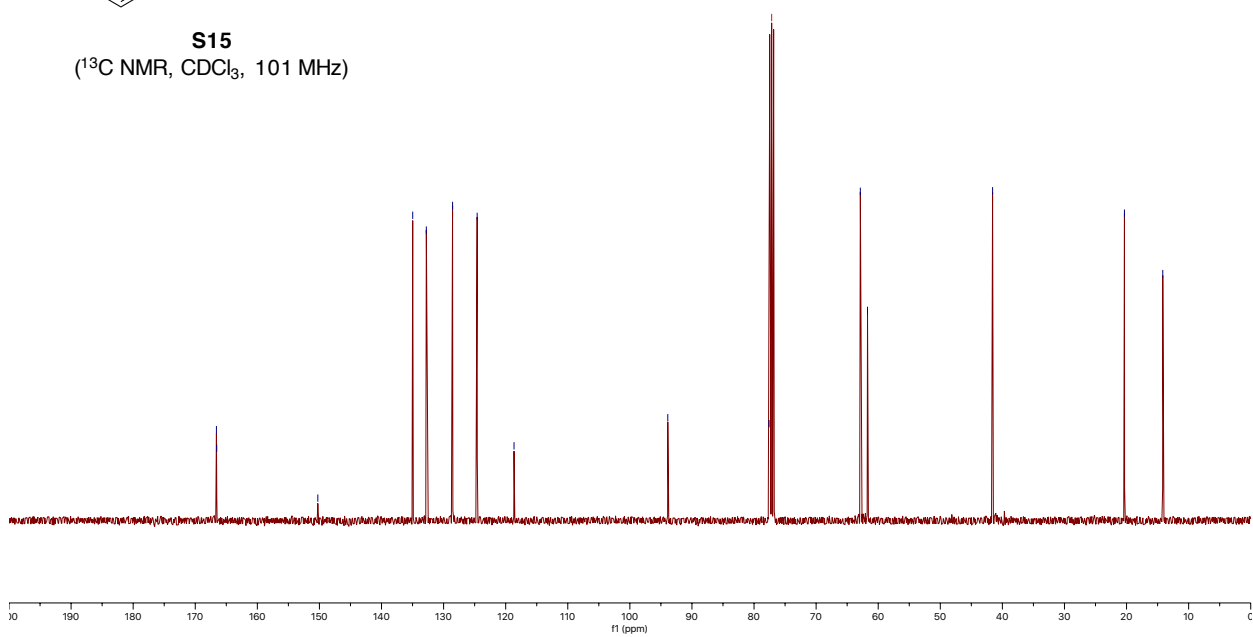

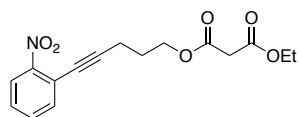

**S16**  
(<sup>1</sup>H NMR, CDCl<sub>3</sub>, 400 MHz)

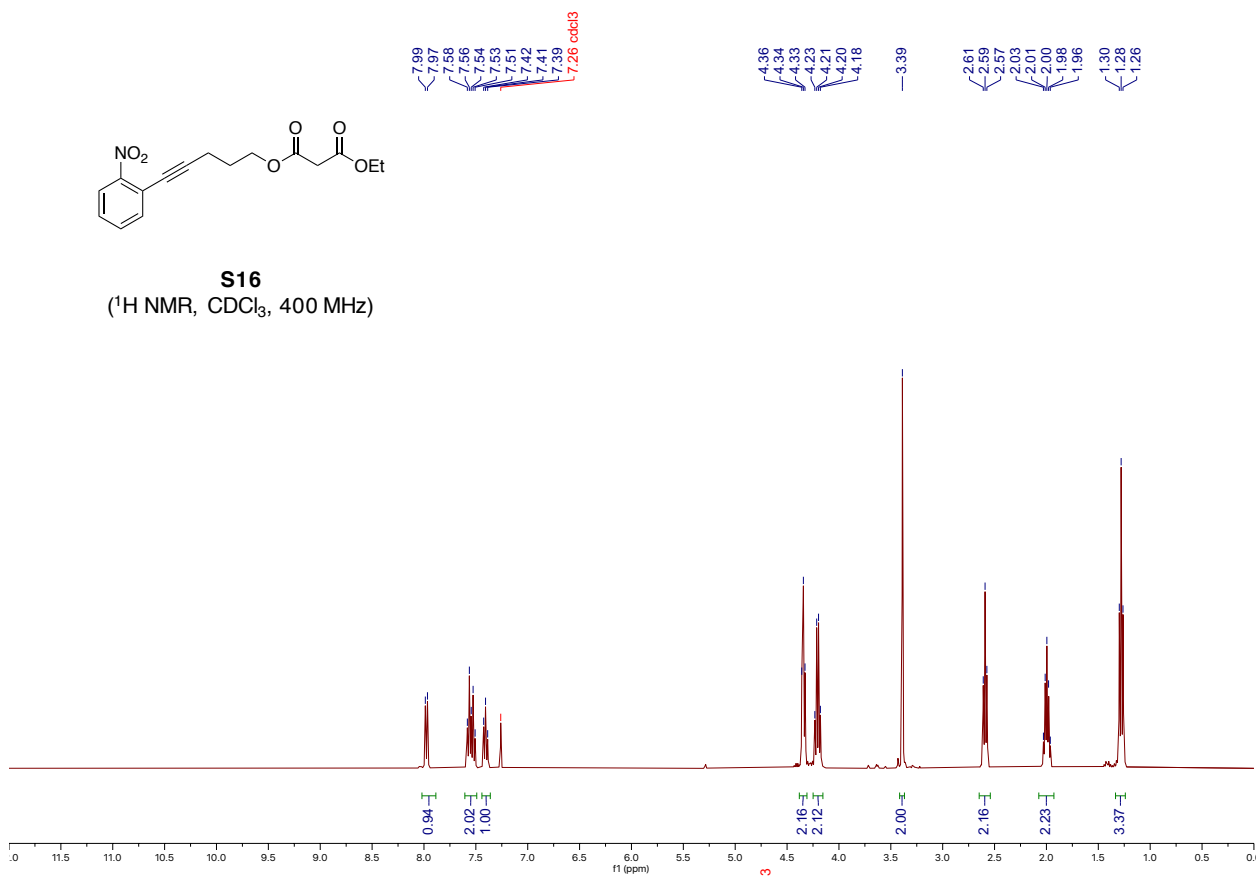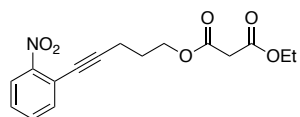

**S16**  
(<sup>13</sup>C NMR, CDCl<sub>3</sub>, 101 MHz)

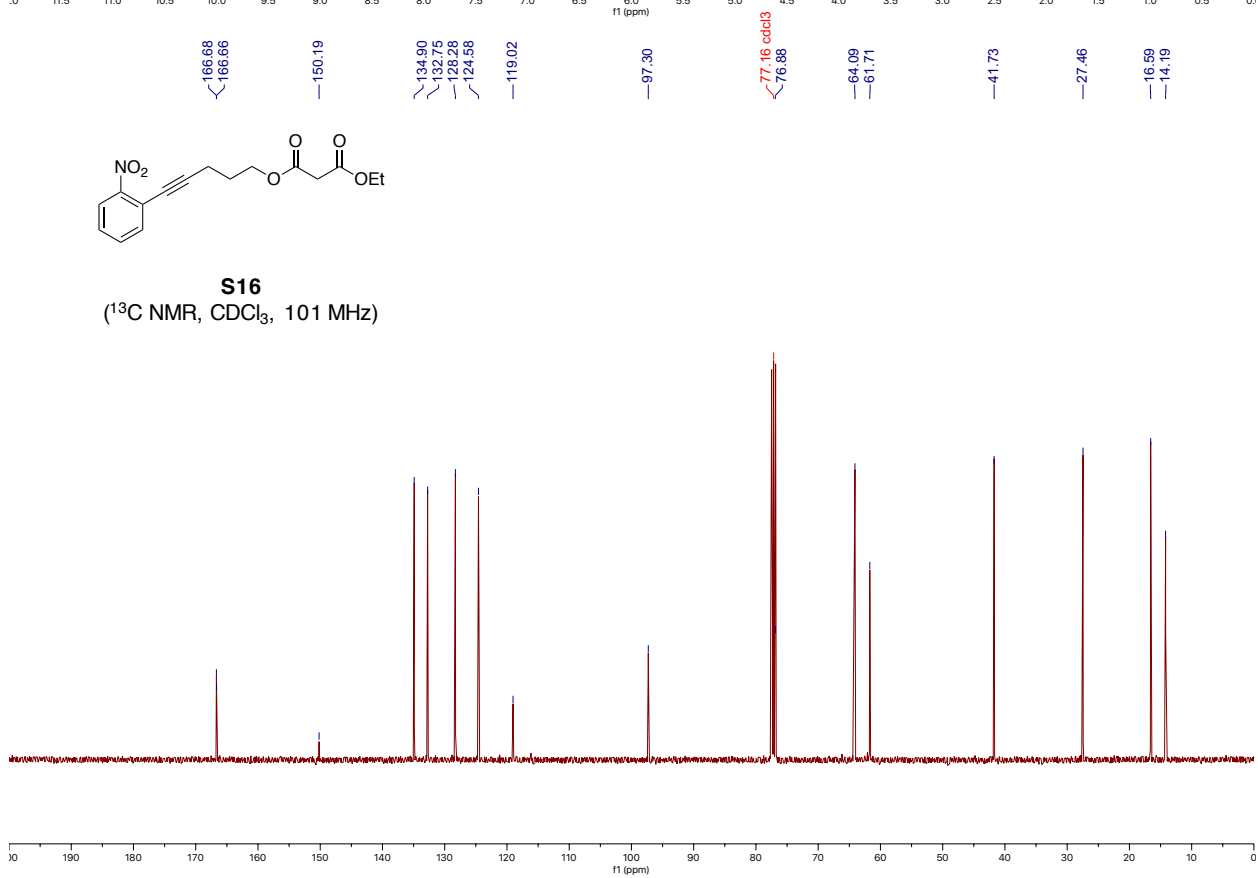

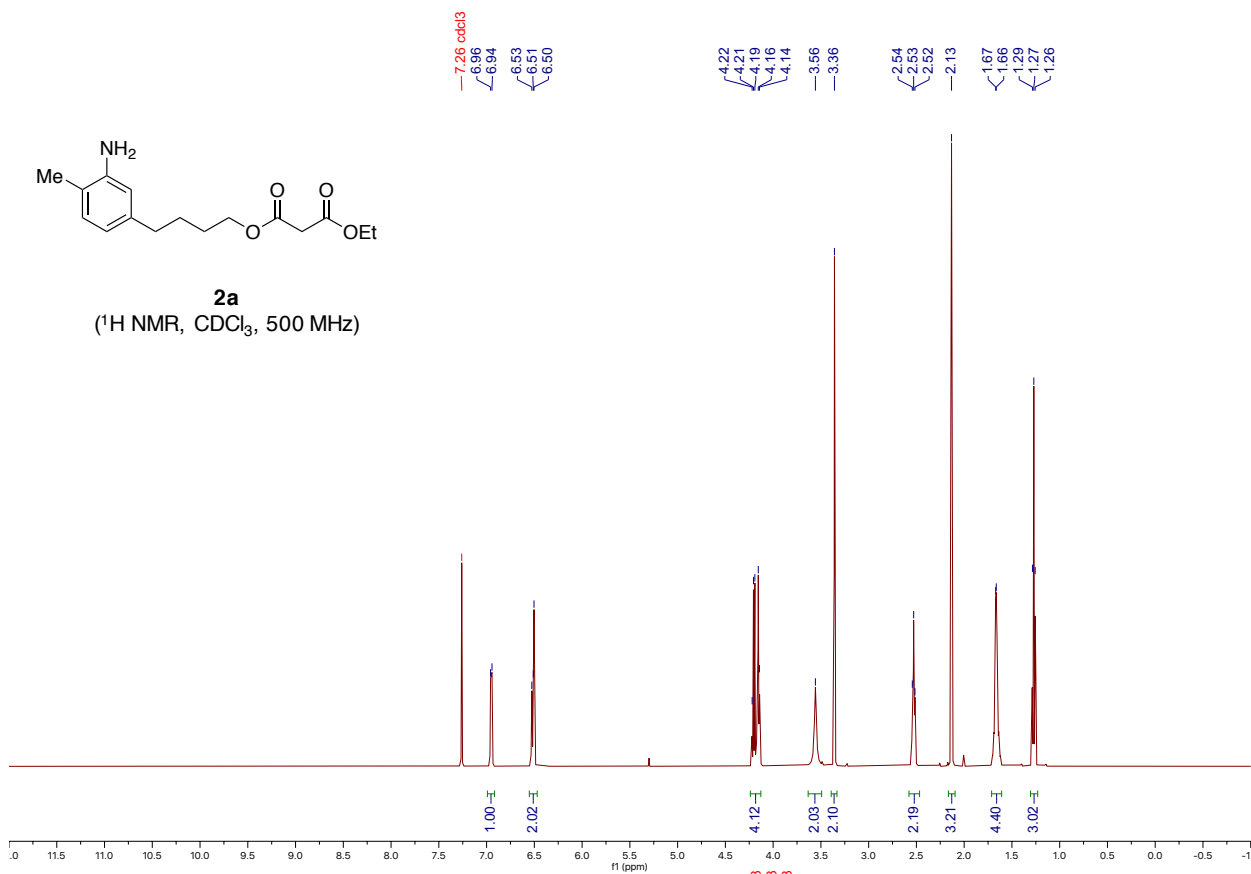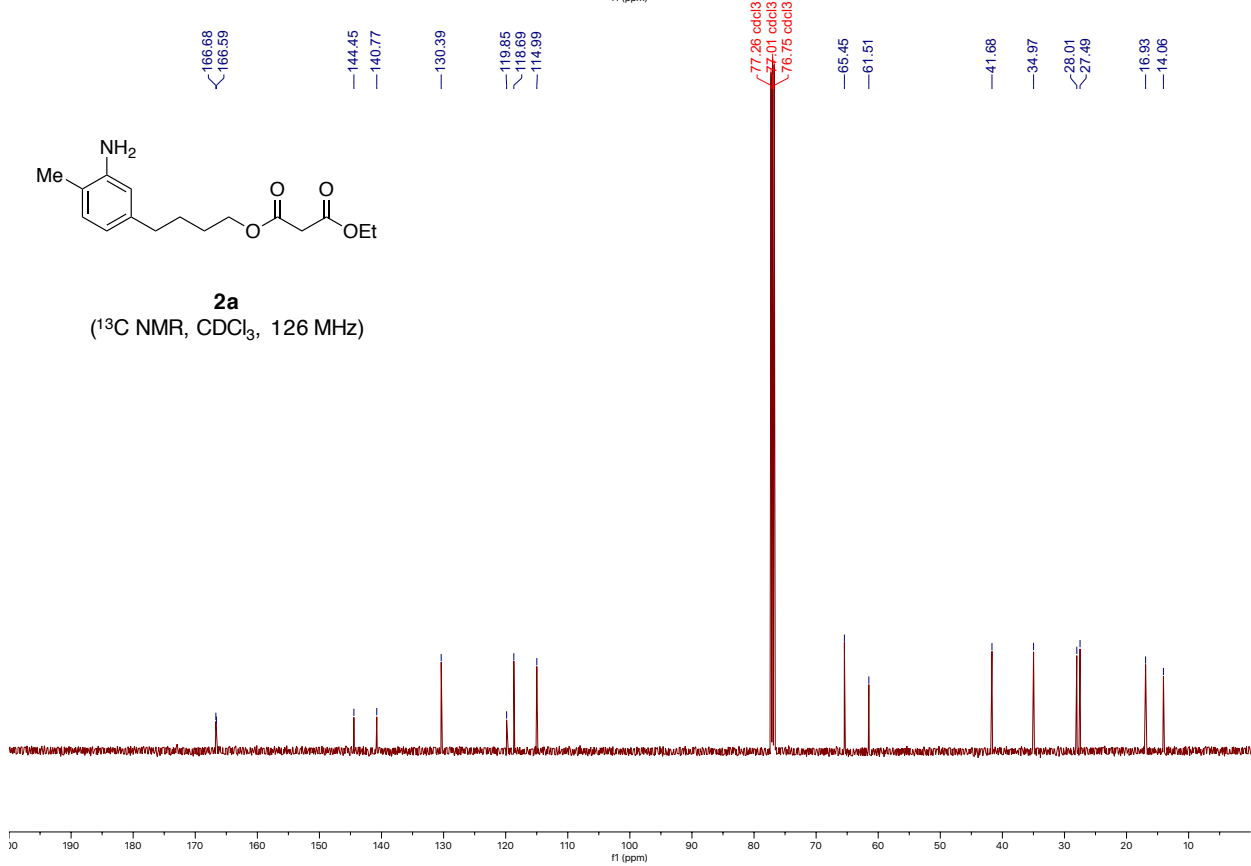

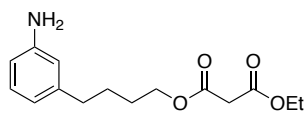

**2b**  
(<sup>1</sup>H NMR, CDCl<sub>3</sub>, 600 MHz)

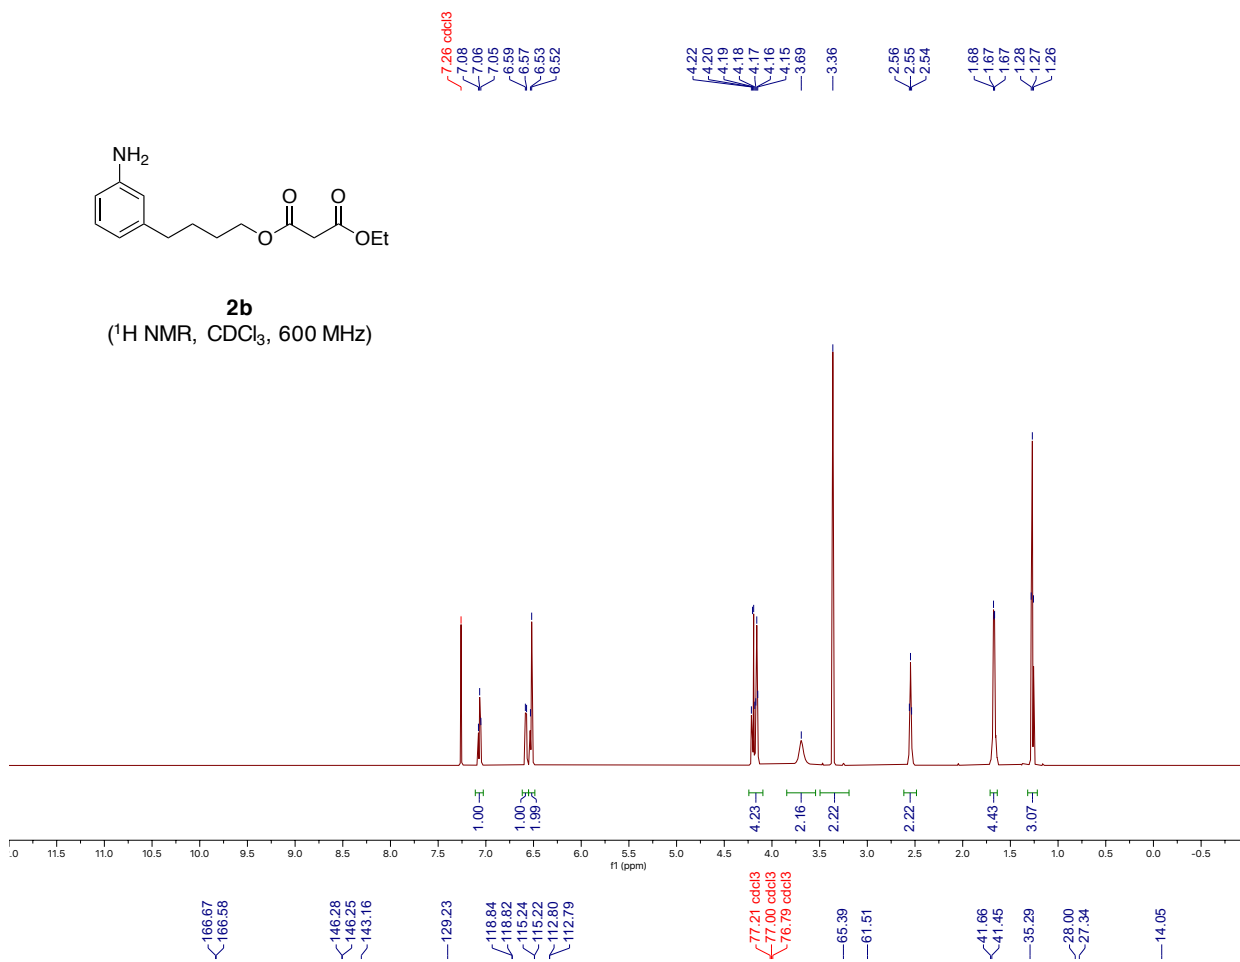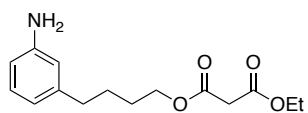

**2b**  
(<sup>13</sup>C NMR, CDCl<sub>3</sub>, 151 MHz)

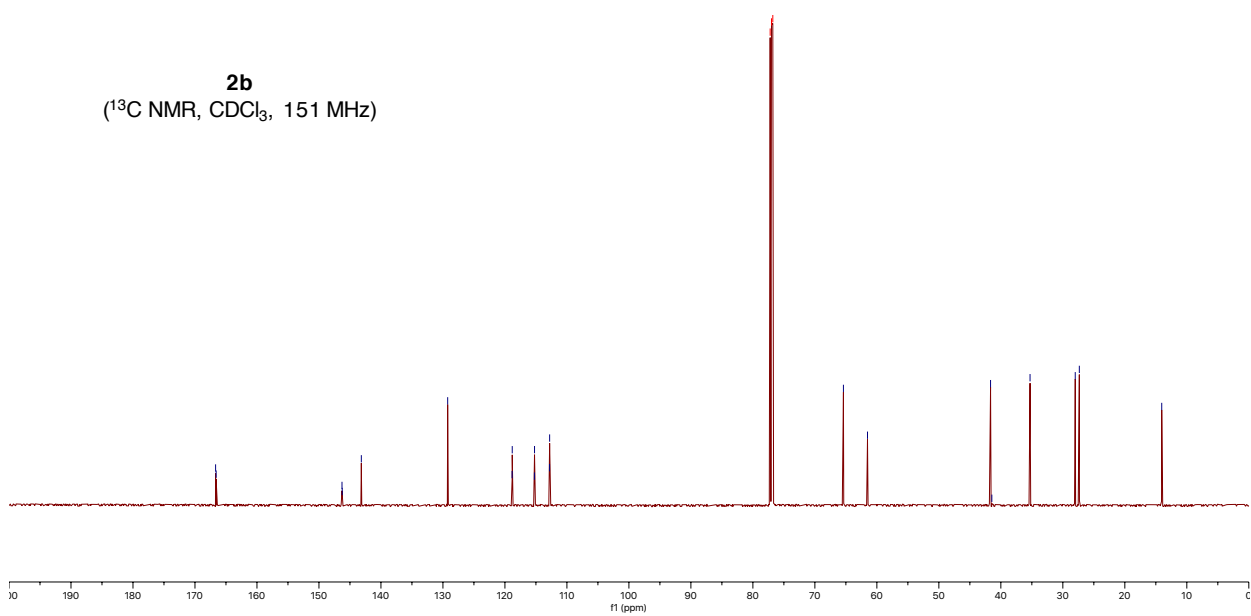

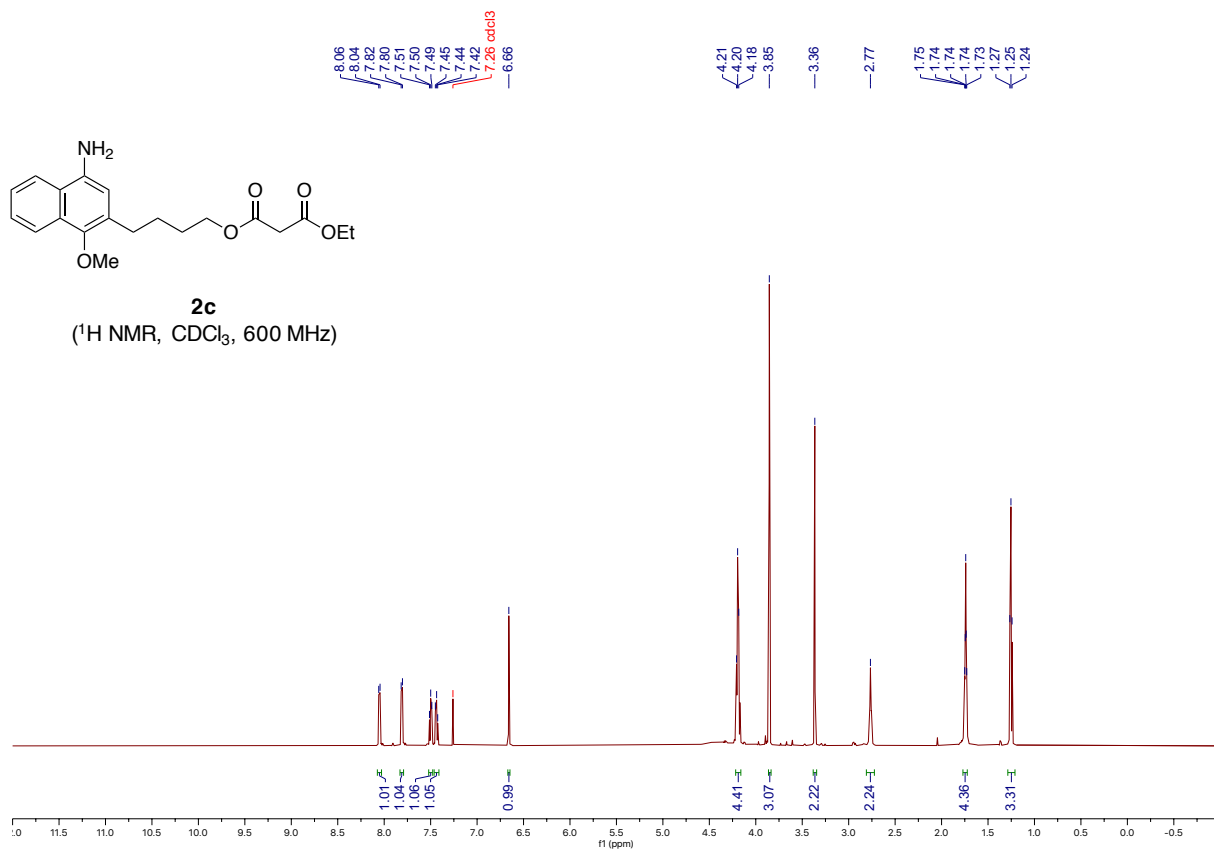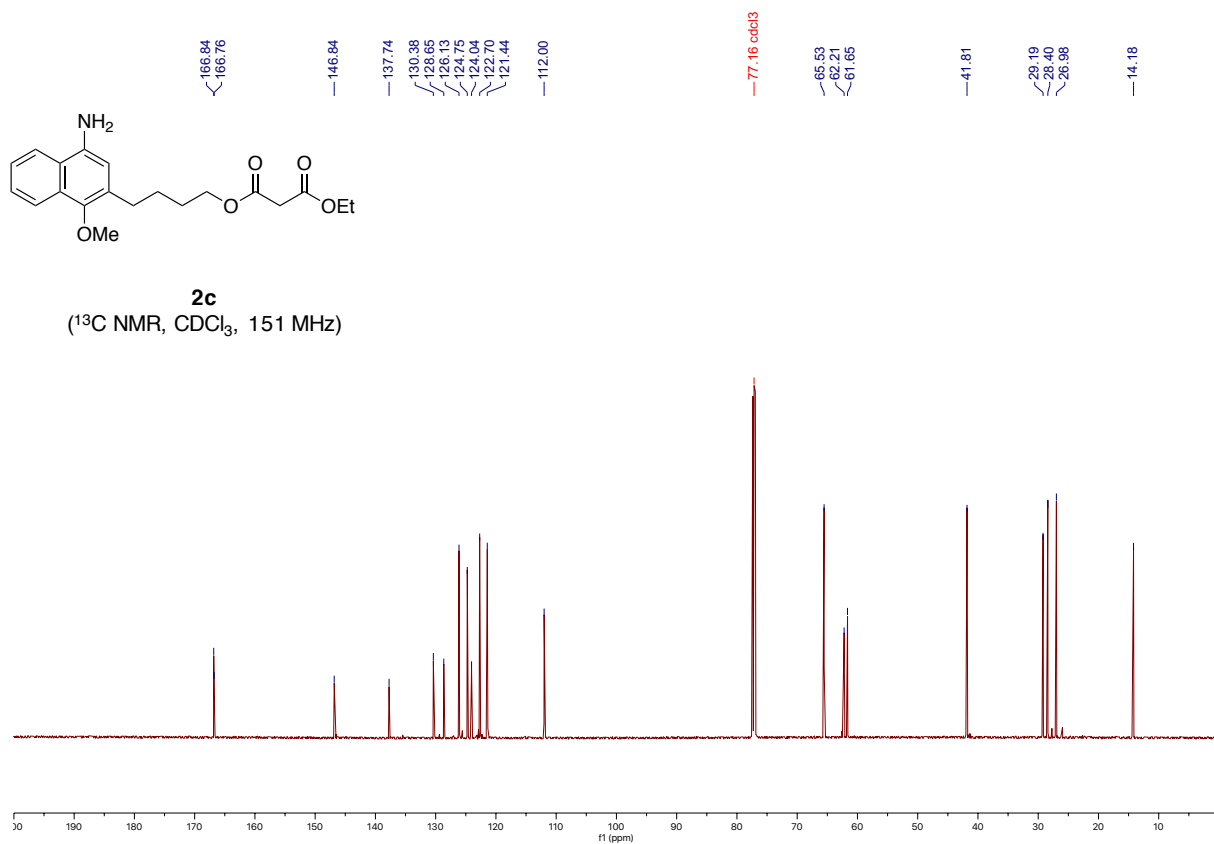

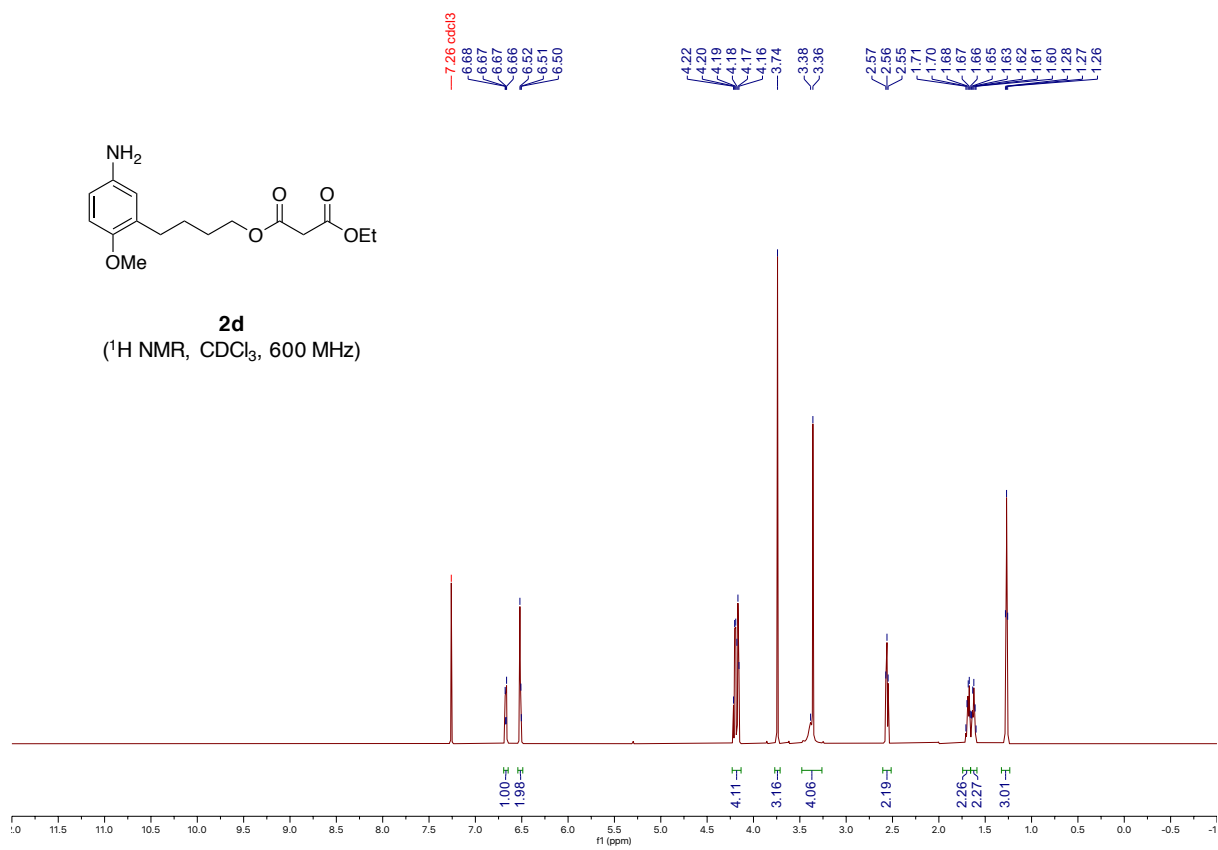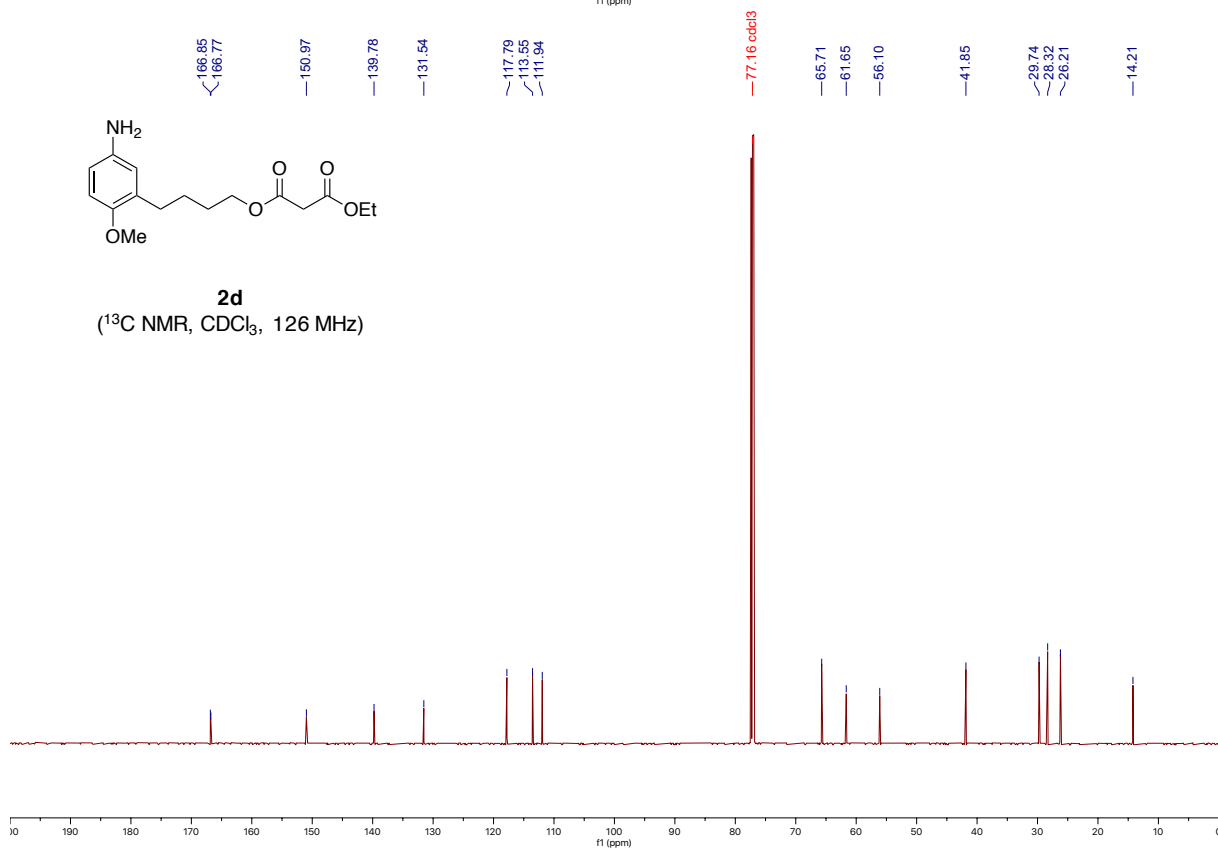



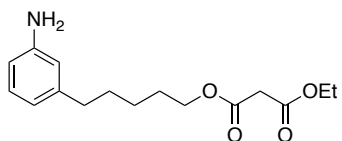

**2e**  
(<sup>1</sup>H NMR, CDCl<sub>3</sub>, 600 MHz)

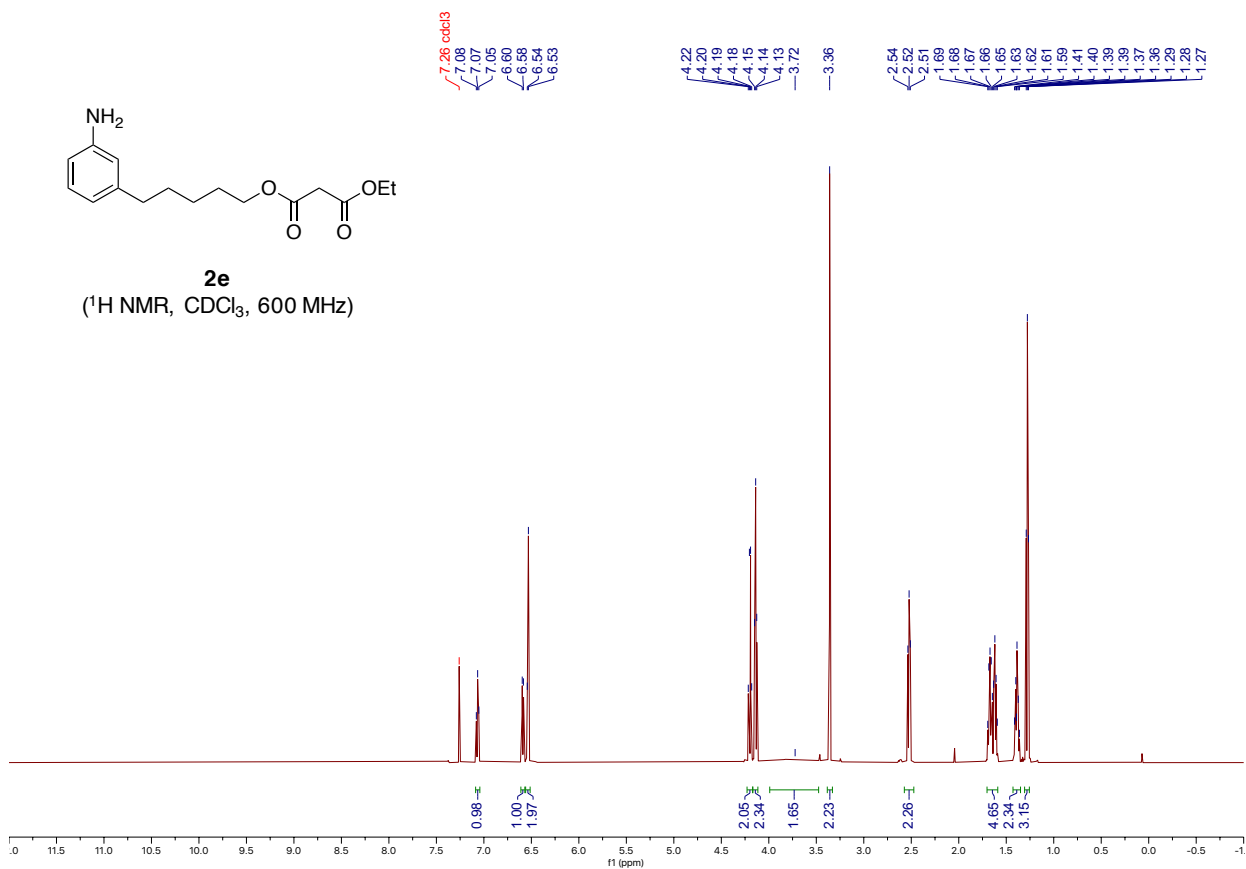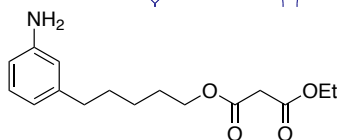

**2e**  
(<sup>13</sup>C NMR, CDCl<sub>3</sub>, 151 MHz)

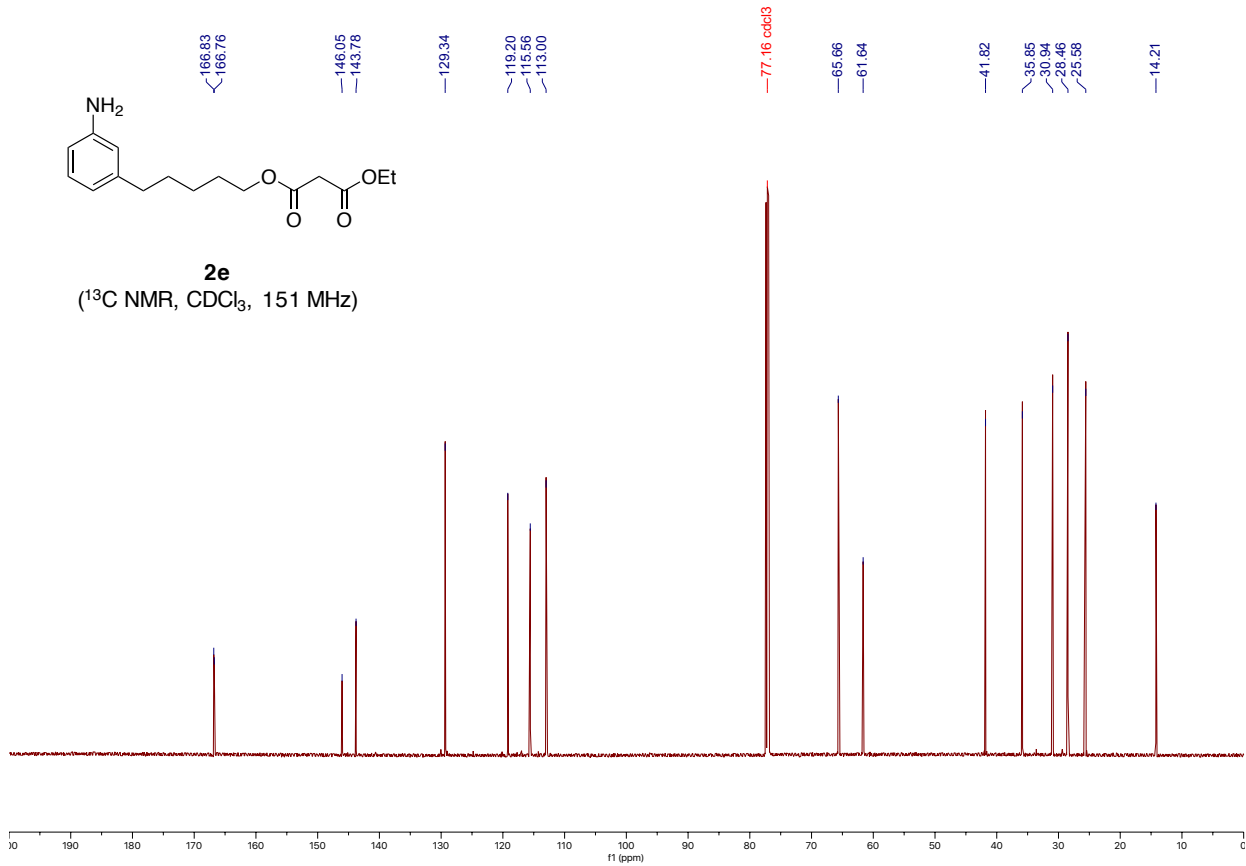

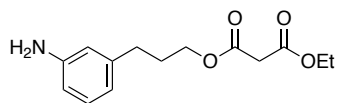

**S17**  
(<sup>1</sup>H NMR, CDCl<sub>3</sub>, 400 MHz)

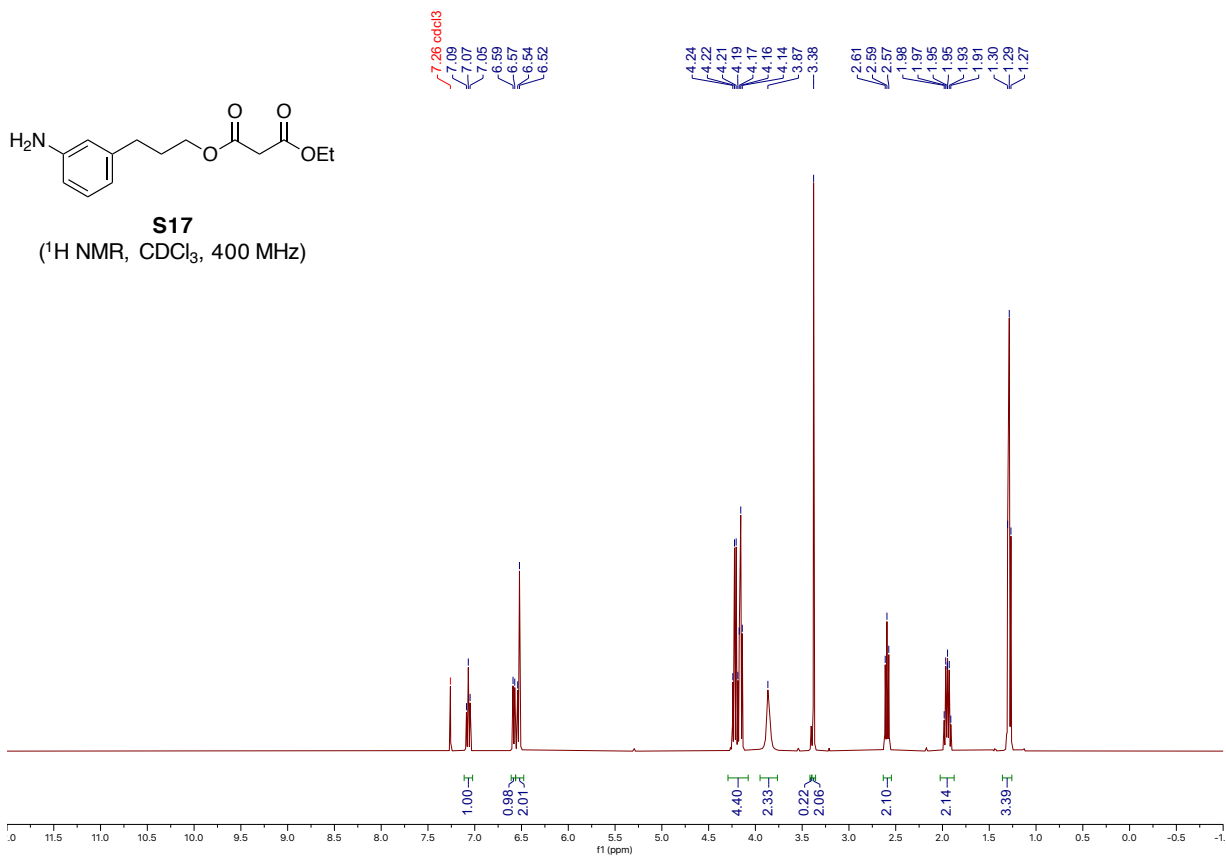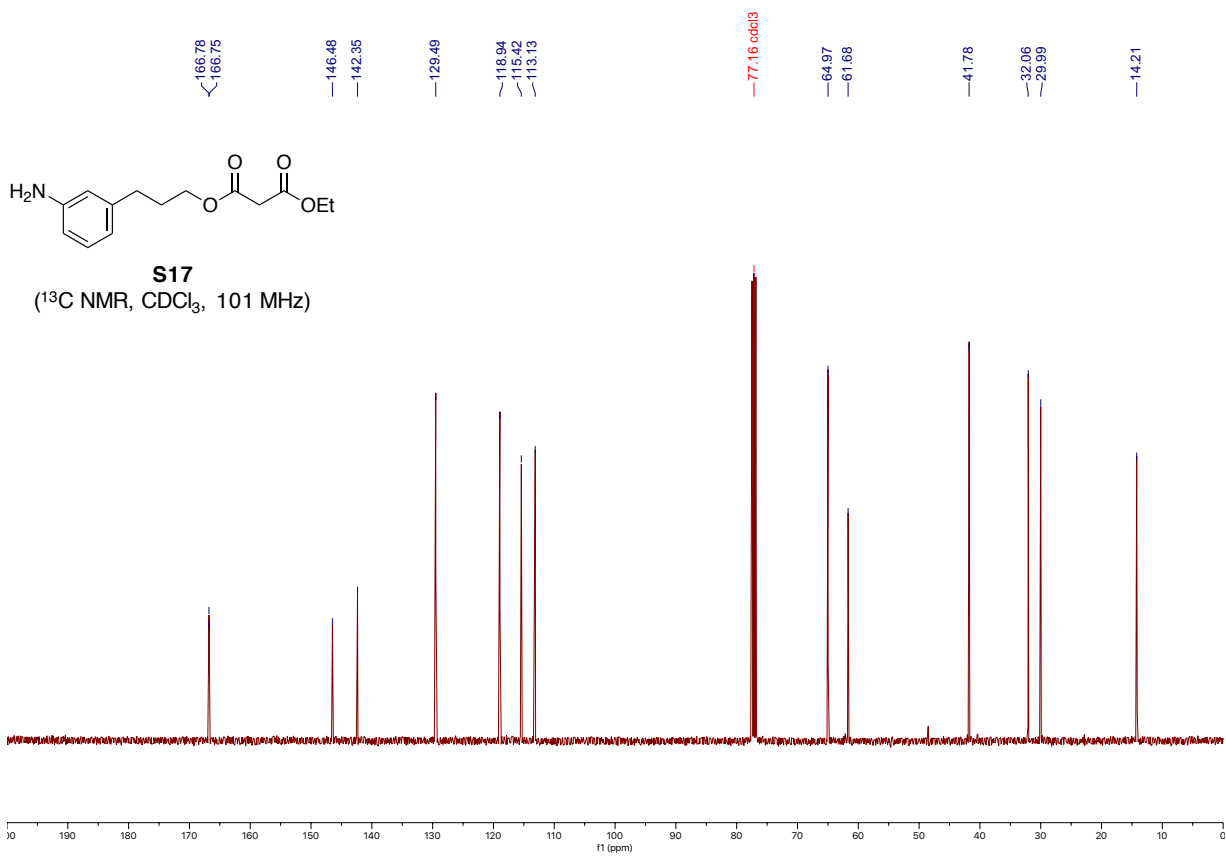

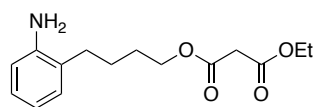

**S19**  
(<sup>1</sup>H NMR, CDCl<sub>3</sub>, 400 MHz)

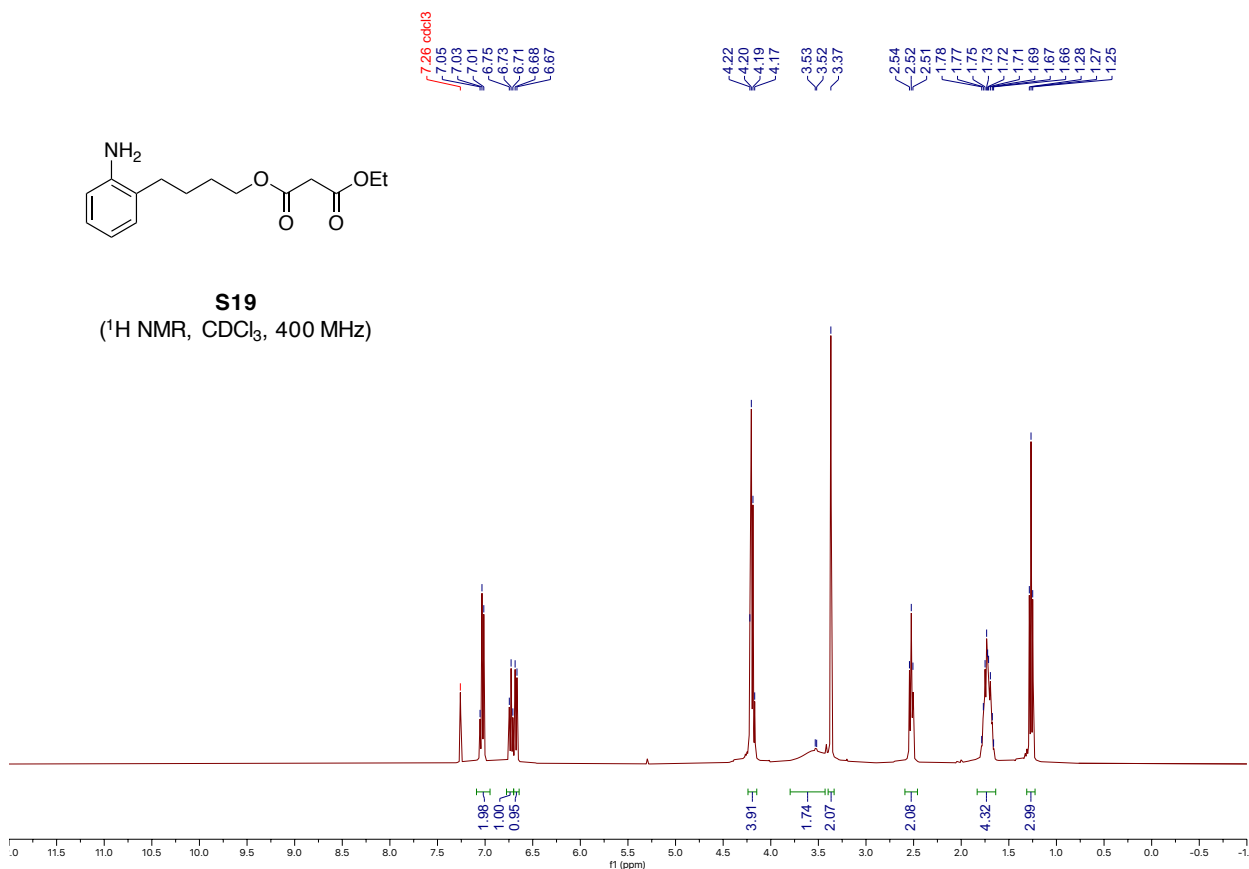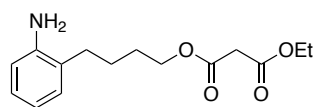

**S18**  
(<sup>13</sup>C NMR, CDCl<sub>3</sub>, 101 MHz)

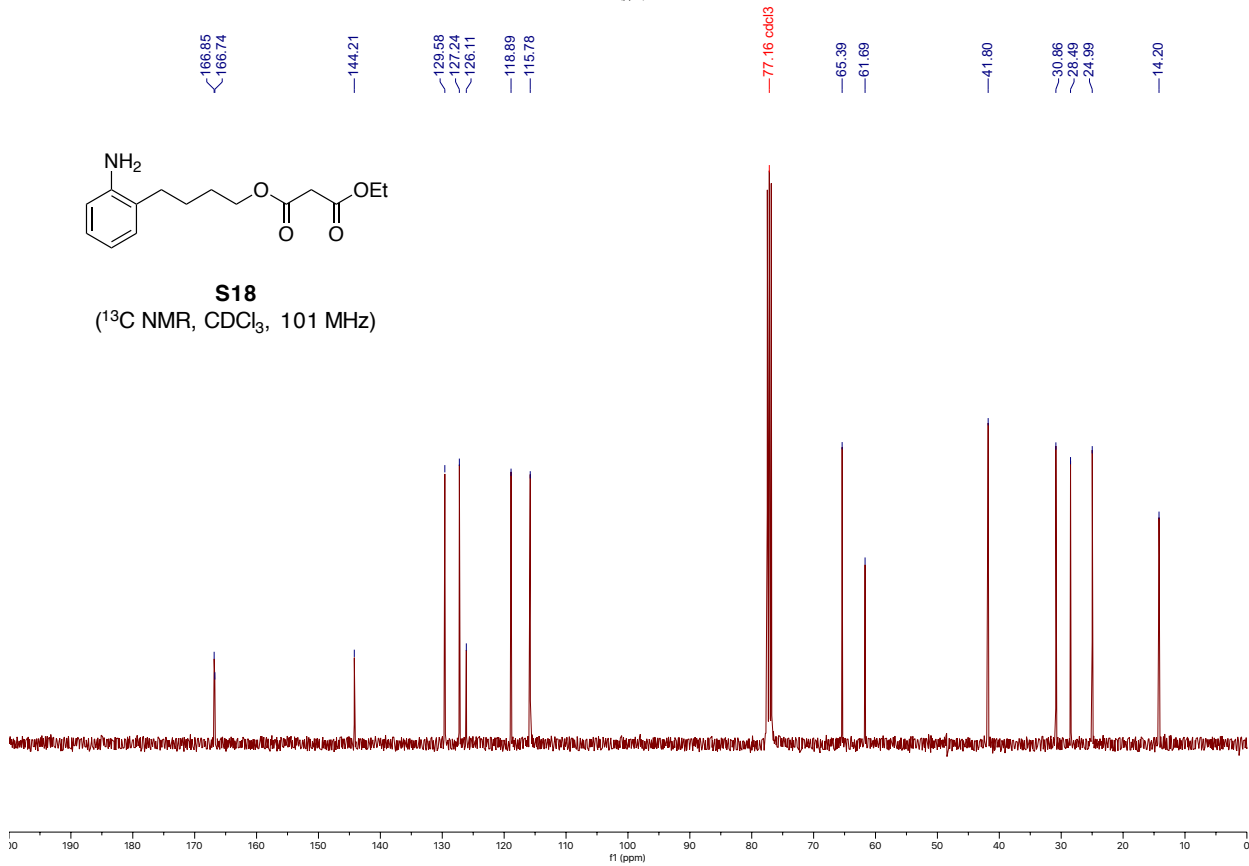

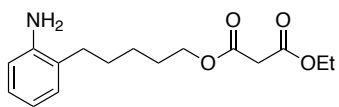

**S19**  
(<sup>1</sup>H NMR, CDCl<sub>3</sub>, 400 MHz)

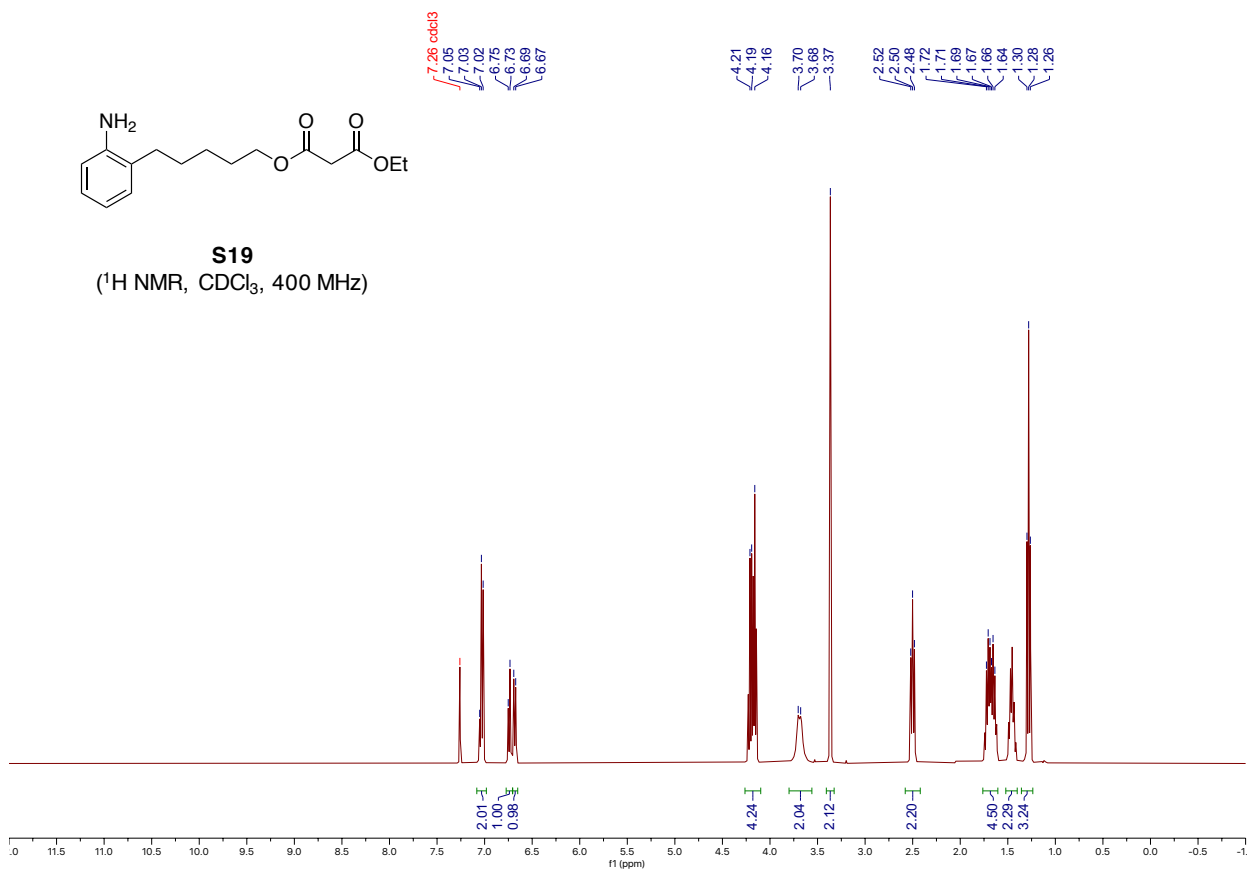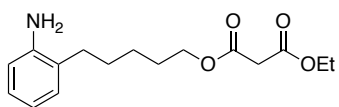

**S19**  
(<sup>13</sup>C NMR, CDCl<sub>3</sub>, 126 MHz)

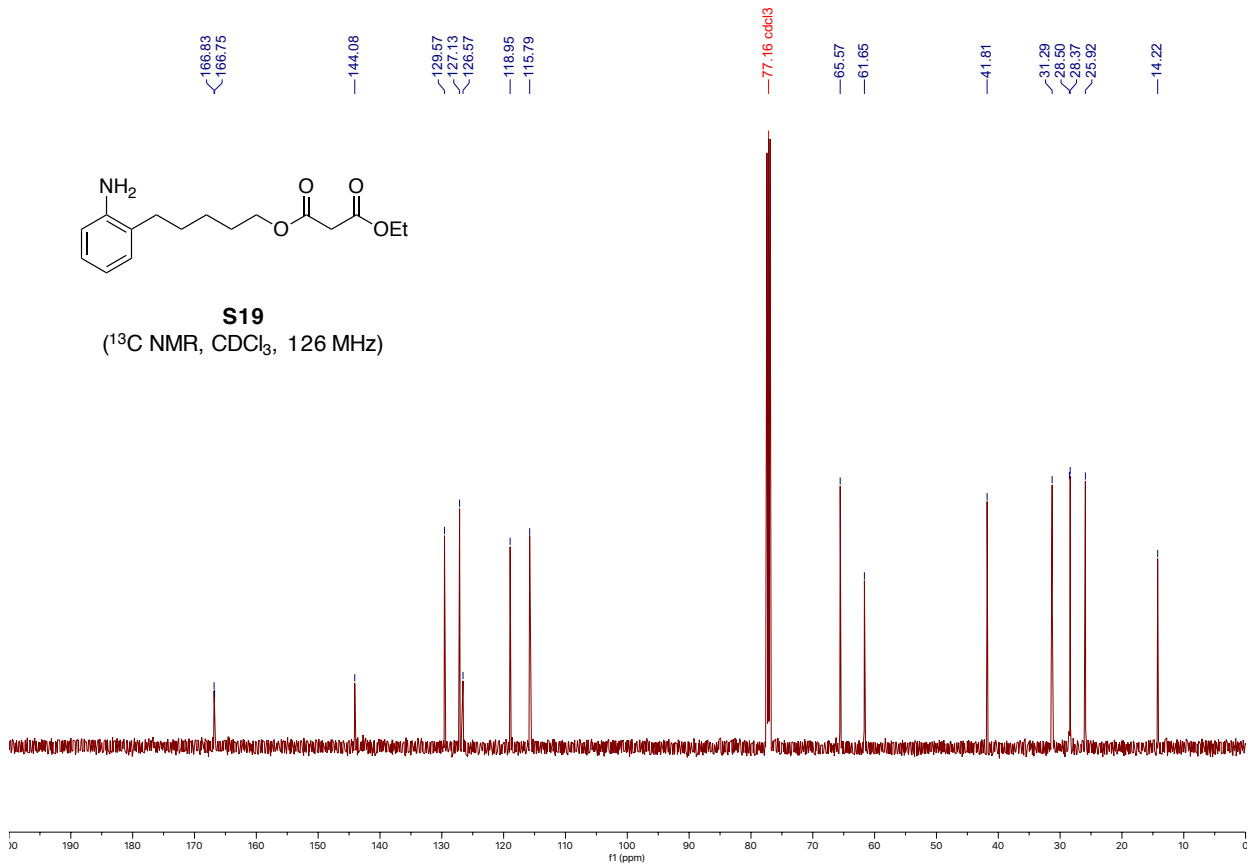

## 6. Synthesis of Aminophenol 2f

### 6.1 General Synthetic Route to 2f

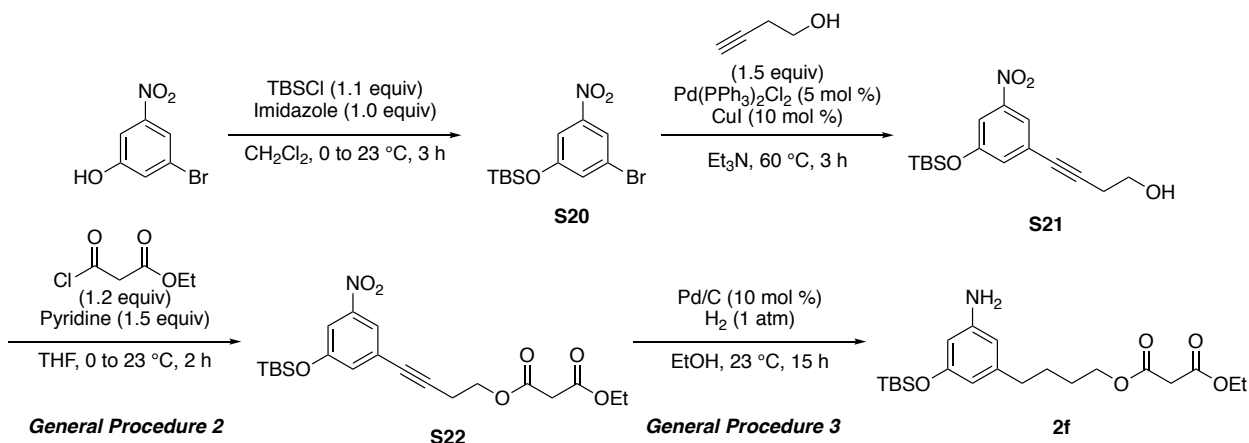

### 6.2 Characterization of Aminophenol 2f and Intermediates (3-bromo-5-nitrophenoxy)(*tert*-butyl)dimethylsilane (S20)

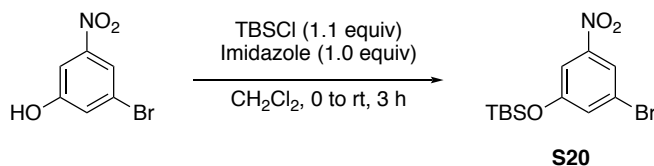

To a RBF equipped with a magnetic stir bar was added 3-bromo-5-nitrophenol (2.000 g, 9.17 mmol, 1.00 equiv), TBSCl (1.5210 g, 10.09 mmol, 1.10 equiv) and CH<sub>2</sub>Cl<sub>2</sub> (9.17 mL, 1.0 M). Reaction mixture was cooled to 0 °C. Imidazole (0.6243 g, 9.17 mmol, 1.00 equiv) was added in one portion to the stirring mixture. Reaction mixture was allowed to warm to room temperature and was left to stir for 3 hours (until consumption of the starting material was observed by TLC). Reaction mixture was diluted with CH<sub>2</sub>Cl<sub>2</sub> (10 mL) and washed with 10% citric acid (w/v) (20 mL). Aqueous layer was extracted with CH<sub>2</sub>Cl<sub>2</sub> (10 mL × 3). Combined organic layers were washed with saturated NaCl (aq) (40 mL), dried over Na<sub>2</sub>SO<sub>4</sub>, filtered and concentrated in vacuo to yield an orange-brown solid. Crude material was used without in the subsequent step without further purification (2.8996 g, 95% yield). **TLC** (1% EtOAc/Hex): R<sub>f</sub> = 0.35.

**IR** (FT-ATR, cm<sup>-1</sup>, neat): ν<sub>max</sub> 3090, 2954, 2930, 2859, 1980, 1532, 1450, 1343, 1274, 1096, 999, 839, 664.

**<sup>1</sup>H NMR** (500 MHz, CDCl<sub>3</sub>) δ 7.98 (t, *J* = 1.8 Hz, 1H), 7.59 (t, *J* = 2.1 Hz, 1H), 7.30 (t, *J* = 1.9 Hz, 1H), 1.00 (s, 9H), 0.26 (s, 6H).

**<sup>13</sup>C NMR** (126 MHz, CDCl<sub>3</sub>) δ 157.2, 149.5, 129.6, 122.9, 119.8, 114.1, 25.6, 18.3, -4.4.

**HRMS** (ESI/Q-TOF): Exact mass calculated for [C<sub>12</sub>H<sub>18</sub>BrNO<sub>3</sub>Si + H]<sup>+</sup> requires *m/z* = 332.0312, found *m/z* = 332.0314.

**4-(3-((*tert*-butyldimethylsilyl)oxy)-5-nitrophenyl)but-3-yn-1-ol (S21)**

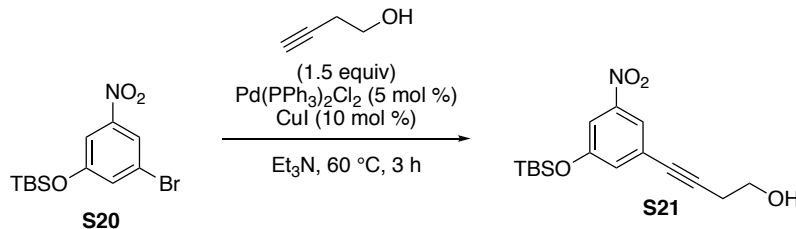

To a flame-dried RBF equipped with a magnetic stir bar was added **S20** (2.1667 g, 6.52 mmol, 1.00 equiv), Pd(PPh<sub>3</sub>)<sub>2</sub>Cl<sub>2</sub> (0.2288 g, 0.33 mmol, 0.05 equiv) and CuI (0.1242 g, 0.65 mmol, 0.10 equiv). RBF was sparged with N<sub>2</sub> for 15 minutes. Dry Et<sub>3</sub>N (6.5 mL, 1.0 M) (stored under CaH<sub>2</sub>) was added. 3-butyn-1-ol (0.74 mL, 9.78 mmol, 1.50 equiv) (stored under N<sub>2</sub> in a one-dram vial with a septa cap) was added dropwise through the septum. Reaction mixture was left to stir for 3 hours at 60 °C. (Note: Prolonged reaction time leads to decreased yield due to cleavage of the TBS group) Reaction mixture was cooled to room temperature, then diluted with EtOAc (15 mL). Reaction mixture was washed with sat. NH<sub>4</sub>Cl (aq) (15 mL). Aqueous layer was extracted with EtOAc (10 mL × 3). Combined organic layers were washed with sat. NaCl(aq) (40 mL), dried over Na<sub>2</sub>SO<sub>4</sub>, filtered and concentrated in vacuo to yield a viscous brown oil. Crude material was purified by flash chromatography (0→30→60% EtOAc/Hex) to yield **S21** as an orange-brown solid (1.7362 g, 83% yield).

TLC (40% EtOAc/Hex): R<sub>f</sub> = 0.54.

IR (FT-ATR, cm<sup>-1</sup>, neat): ν<sub>max</sub> 3301, 2935, 2862, 2114, 1530, 1426, 1343, 1256, 1185, 1034, 781.

<sup>1</sup>H NMR (400 MHz, CDCl<sub>3</sub>) δ 7.89 – 7.82 (m, 1H), 7.58 (t, *J* = 2.2 Hz, 1H), 7.16 (dd, *J* = 2.2, 1.4 Hz, 1H), 3.85 (t, *J* = 6.3 Hz, 2H), 2.71 (t, *J* = 6.3 Hz, 2H), 1.76 (brs, 1H), 0.99 (s, 9H), 0.24 (s, 6H).

<sup>13</sup>C NMR (101 MHz, CDCl<sub>3</sub>) δ 156.3, 149.1, 129.2, 125.8, 119.8, 114.9, 89.4, 80.3, 61.1, 25.6, 23.9, 18.3, -4.33.

HRMS (ESI/Q-TOF): Exact mass calculated for [C<sub>16</sub>H<sub>23</sub>NO<sub>4</sub>Si + H]<sup>+</sup> requires *m/z* = 322.1469, found *m/z* = 322.1479.

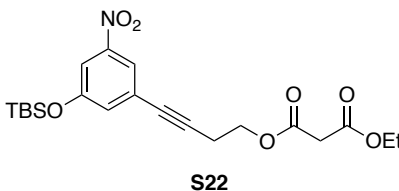

**4-(3-((*tert*-butyldimethylsilyl)oxy)-5-nitrophenyl)but-3-yn-1-yl ethyl malonate (S22)** was synthesized following from **S21** following **General Procedure 2**. Crude material was purified by flash chromatography (0→20→40% EtOAc/Hex) to yield **S22** as a pale yellow oil (2.2784 g, 97% yield).

TLC (20% EtOAc/Hex): R<sub>f</sub> = 0.38.

IR (FT-ATR, cm<sup>-1</sup>, neat): ν<sub>max</sub> 2955, 2931, 2859, 2113, 1734, 1614, 1535, 1348, 1256, 1184, 1146, 1032, 840.

**<sup>1</sup>H NMR** (600 MHz, CDCl<sub>3</sub>) δ 7.87 – 7.83 (m, 1H), 7.58 (t, *J* = 2.2 Hz, 1H), 7.15 (dd, *J* = 2.2, 1.4 Hz, 1H), 4.34 (t, *J* = 6.8 Hz, 2H), 4.21 (q, *J* = 7.1 Hz, 2H), 3.42 (s, 2H), 2.79 (t, *J* = 6.8 Hz, 2H), 1.27 (t, *J* = 7.1 Hz, 3H), 0.99 (s, 9H), 0.25 (s, 6H).

**<sup>13</sup>C NMR** (151 MHz, CDCl<sub>3</sub>) δ 166.6, 166.5, 156.4, 149.1, 129.2, 125.6, 119.8, 115.0, 87.9, 80.2, 63.0, 61.8, 41.6, 25.7, 19.9, 18.3, 14.2, –4.3.

**HRMS** (ESI/Q-TOF): Exact mass calculated for [C<sub>21</sub>H<sub>29</sub>NO<sub>7</sub>Si+H]<sup>+</sup> requires *m/z* = 436.1786, found *m/z* = 436.1786.

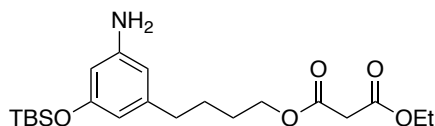

**2f**

**4-(3-amino-5-((*tert*-butyldimethylsilyl)oxy)phenyl)butyl ethyl malonate (2f)** was synthesized from **S22** following **General Procedure 3**. Crude material was purified by silica chromatography (0→25→35% EtOAc/Hex) to yield **2f** as an orange oil (2.0160 g, 94% yield).

**TLC** (30% EtOAc/Hex): *R<sub>f</sub>* = 0.50.

**IR** (FT-ATR, cm<sup>-1</sup>, neat): *v*<sub>max</sub> 3468, 3380, 2930, 2957, 1730, 1591, 1330, 1176, 1150, 835.

**<sup>1</sup>H NMR** (600 MHz, CDCl<sub>3</sub>) δ 6.13 (s, 1H), 6.08 (s, 1H), 6.03 (t, *J* = 2.0 Hz, 1H), 4.20 (q, *J* = 7.1 Hz, 2H), 4.15 (t, *J* = 6.2 Hz, 2H), 3.58 (s, 2H), 3.36 (s, 2H), 2.47 (t, *J* = 7.1 Hz, 2H), 1.65 (tdt, *J* = 10.7, 7.8, 3.2 Hz, 6H), 1.27 (t, *J* = 7.1 Hz, 2H), 0.97 (s, 9H), 0.18 (s, 6H).

**<sup>13</sup>C NMR** (151 MHz, CDCl<sub>3</sub>) δ 166.8, 166.7, 156.75, 147.5, 144.3, 110.9, 108.8, 104.9, 65.6, 61.7, 60.5, 41.8, 35.4, 28.1, 27.4, 25.8, 21.2, 18.3, 14.2, –4.2.

**HRMS** (ESI/Q-TOF): Exact mass calculated for [C<sub>21</sub>H<sub>35</sub>NO<sub>5</sub>Si+H]<sup>+</sup> requires *m/z* = 410.2357, found *m/z* = 410.2357.

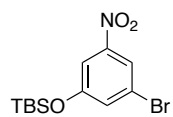

**S20**  
(<sup>1</sup>H NMR, CDCl<sub>3</sub>, 500 MHz)

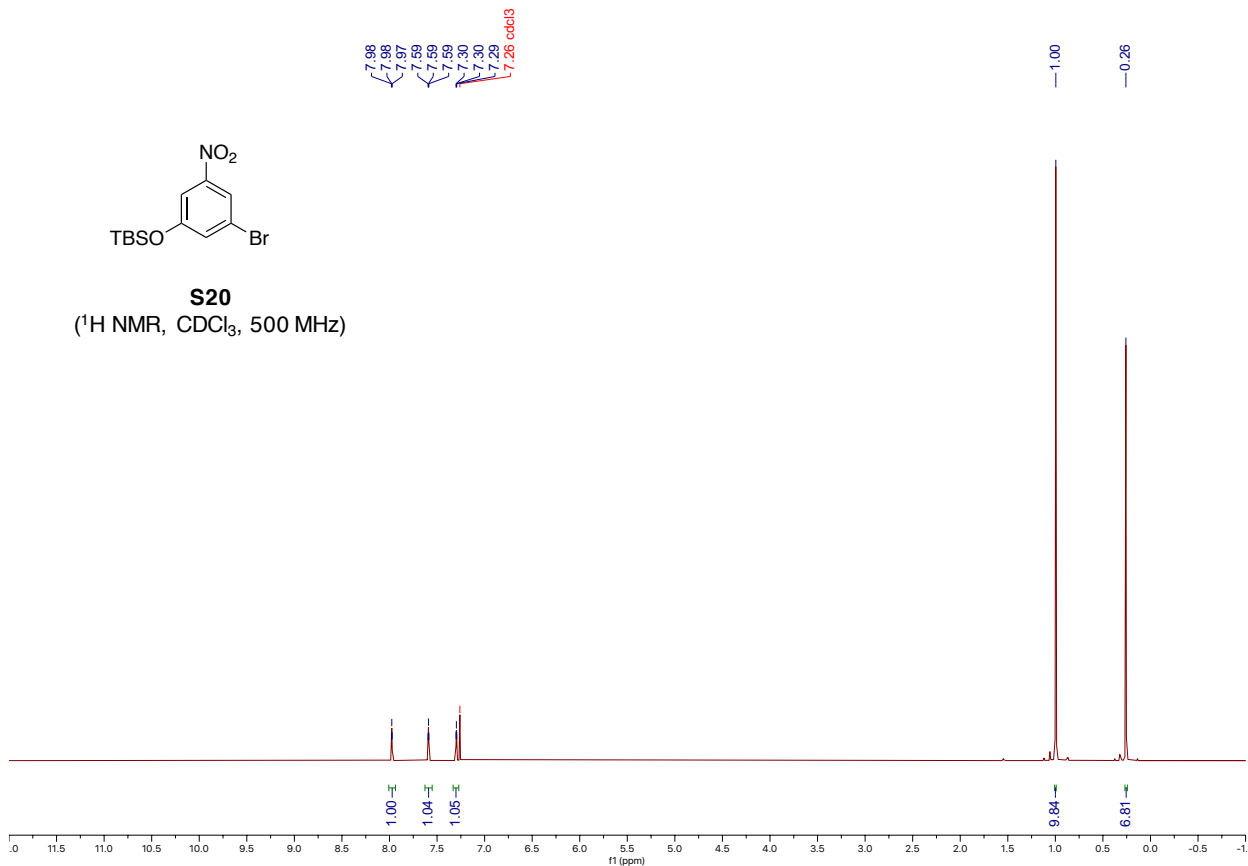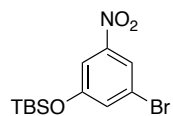

**S20**  
(<sup>13</sup>C NMR, CDCl<sub>3</sub>, 126 MHz)

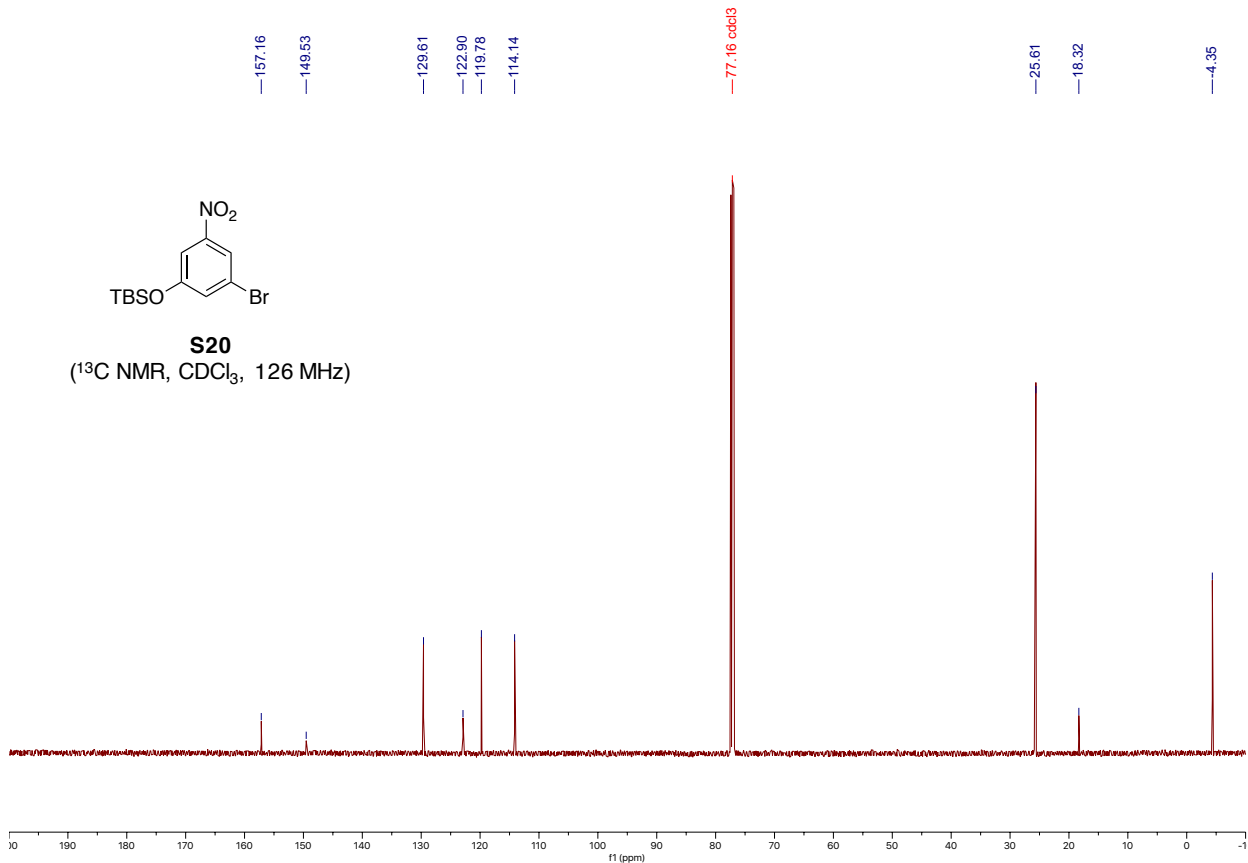



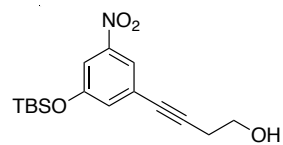

**S21**  
(<sup>1</sup>H NMR, CDCl<sub>3</sub>, 400 MHz)

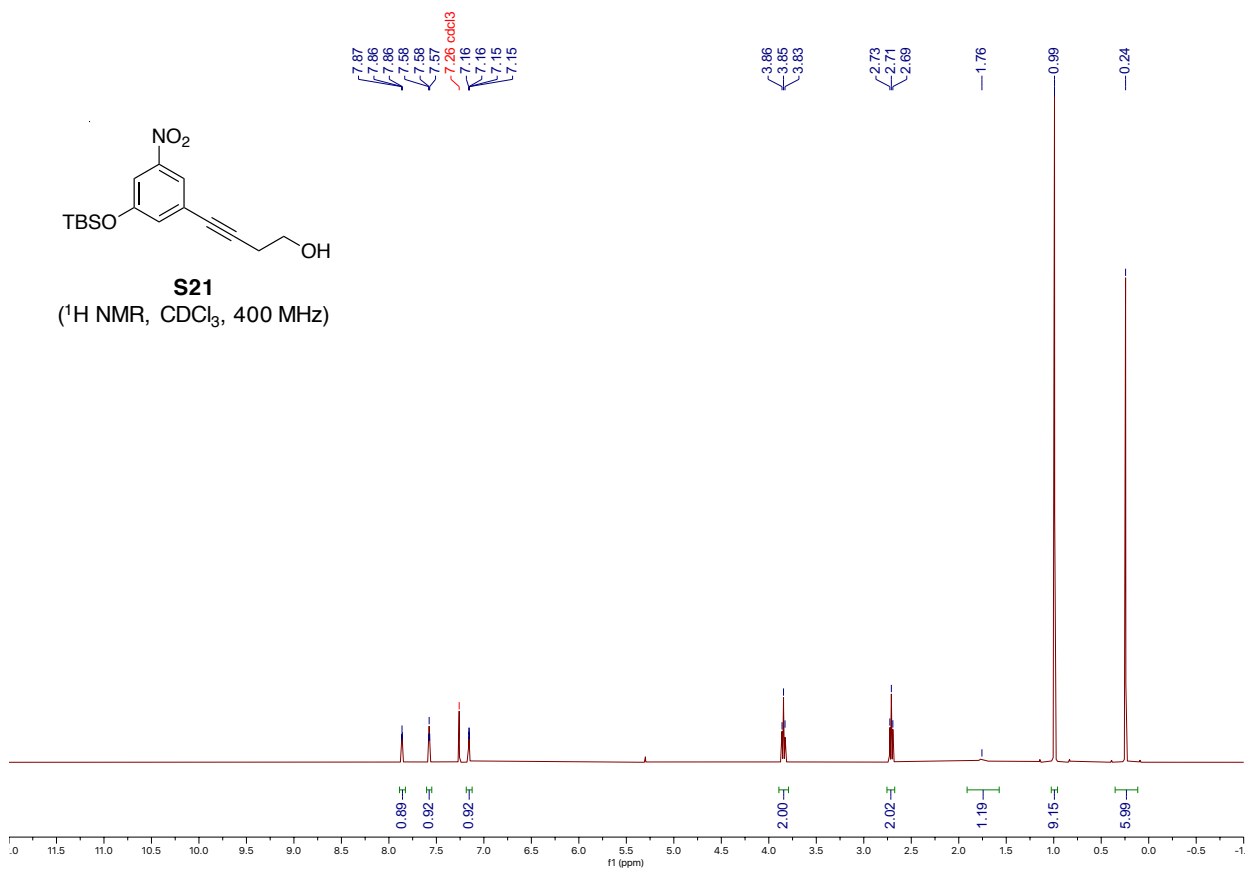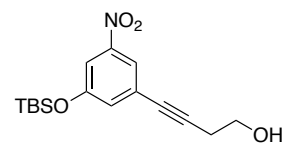

**S21**  
(<sup>13</sup>C NMR, CDCl<sub>3</sub>, 101 MHz)

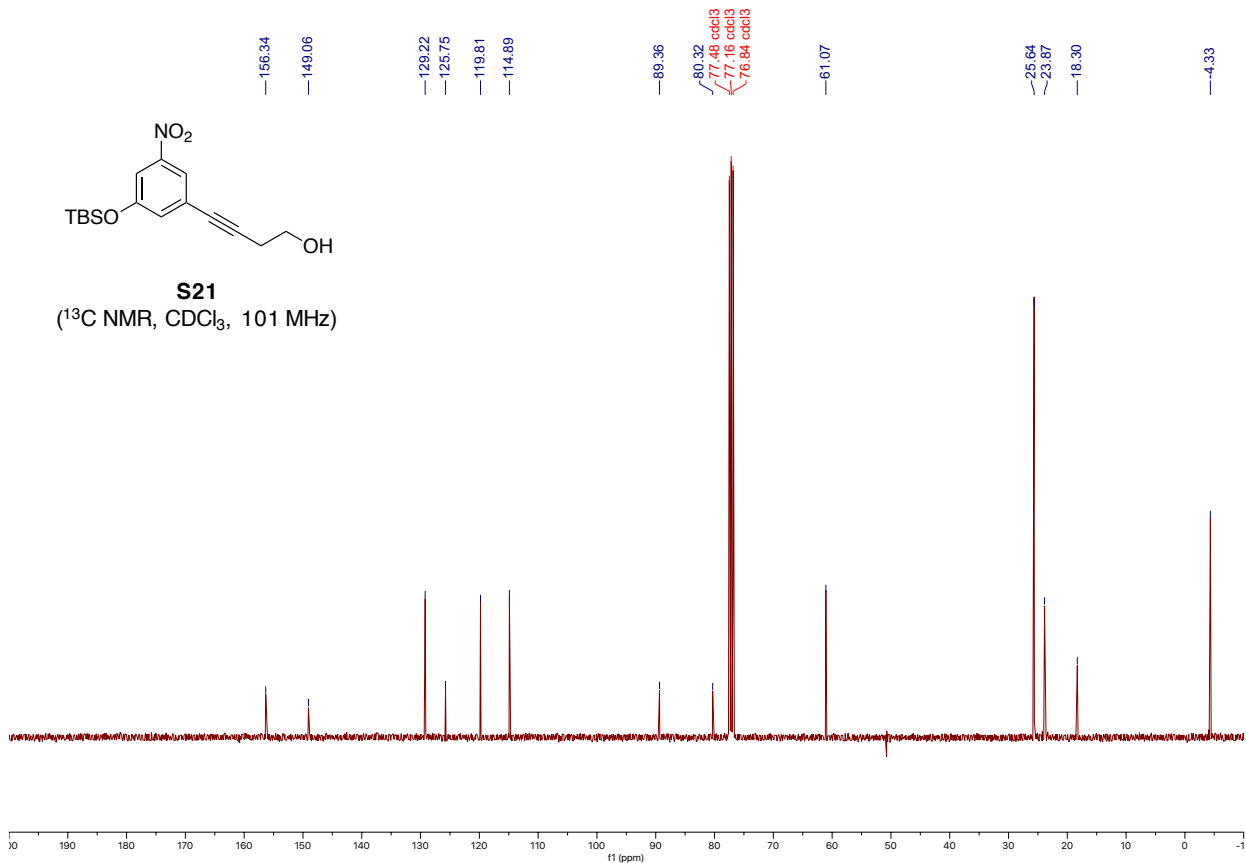

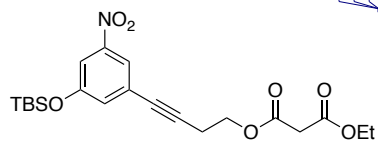

**S22**  
(<sup>1</sup>H NMR, CDCl<sub>3</sub>, 600 MHz)

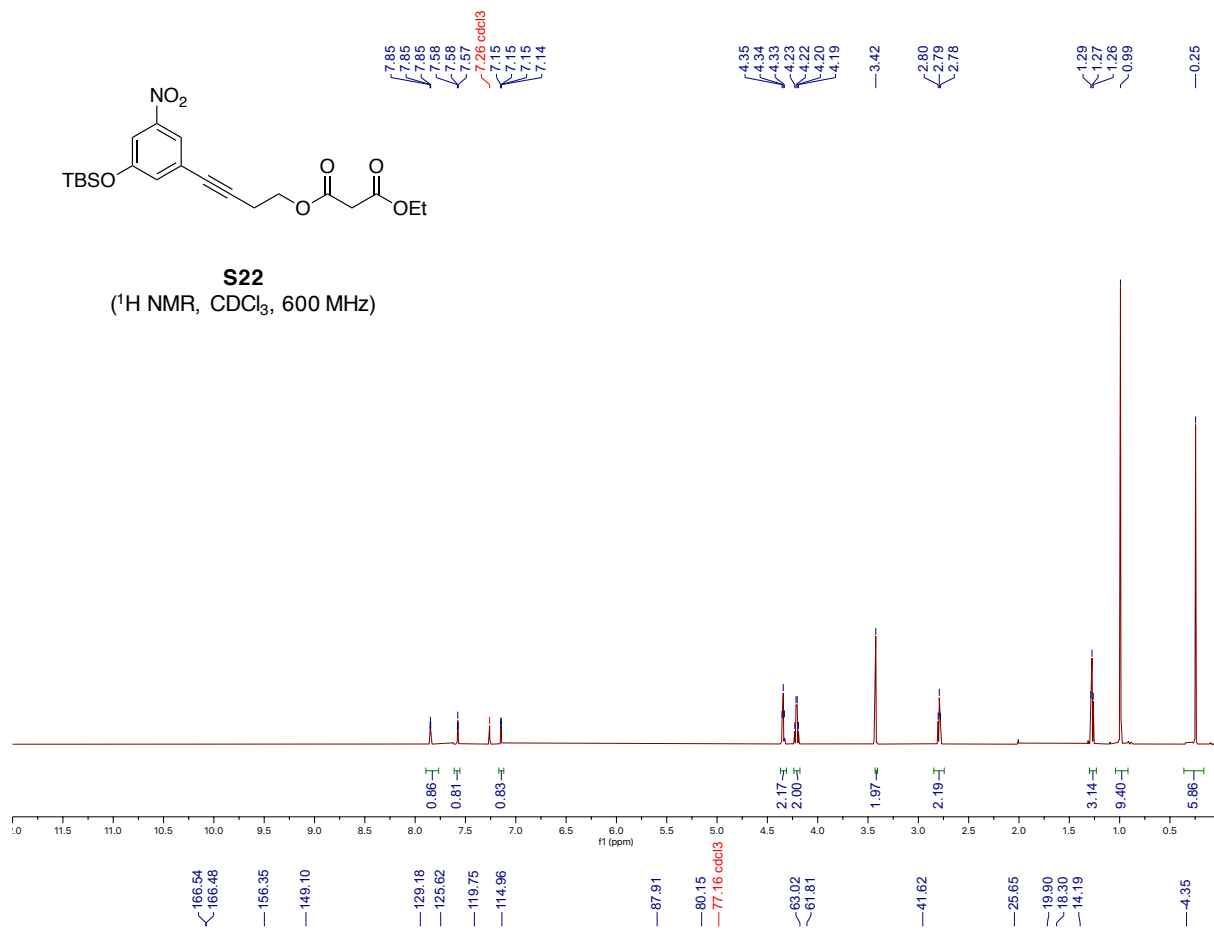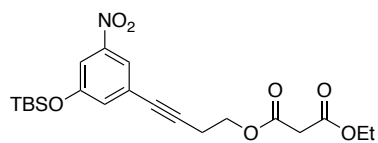

**S22**  
(<sup>13</sup>C NMR, CDCl<sub>3</sub>, 151 MHz)

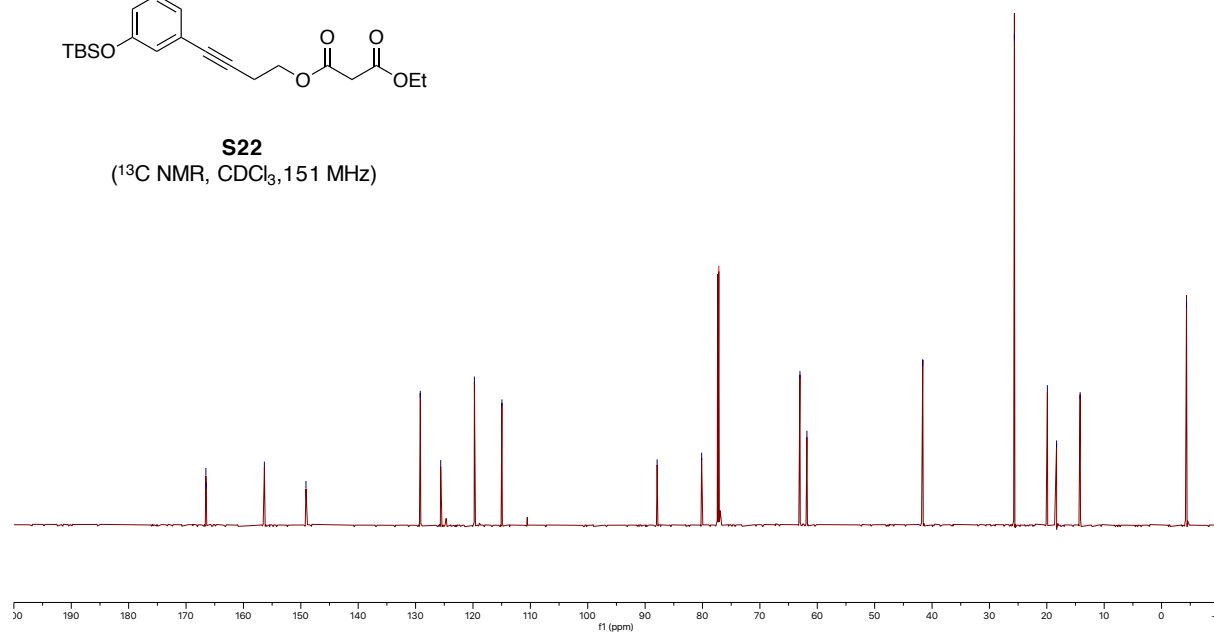

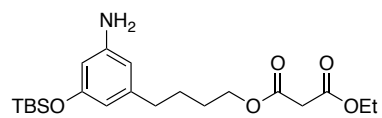

**2f**  
(<sup>1</sup>H NMR, CDCl<sub>3</sub>, 600 MHz)

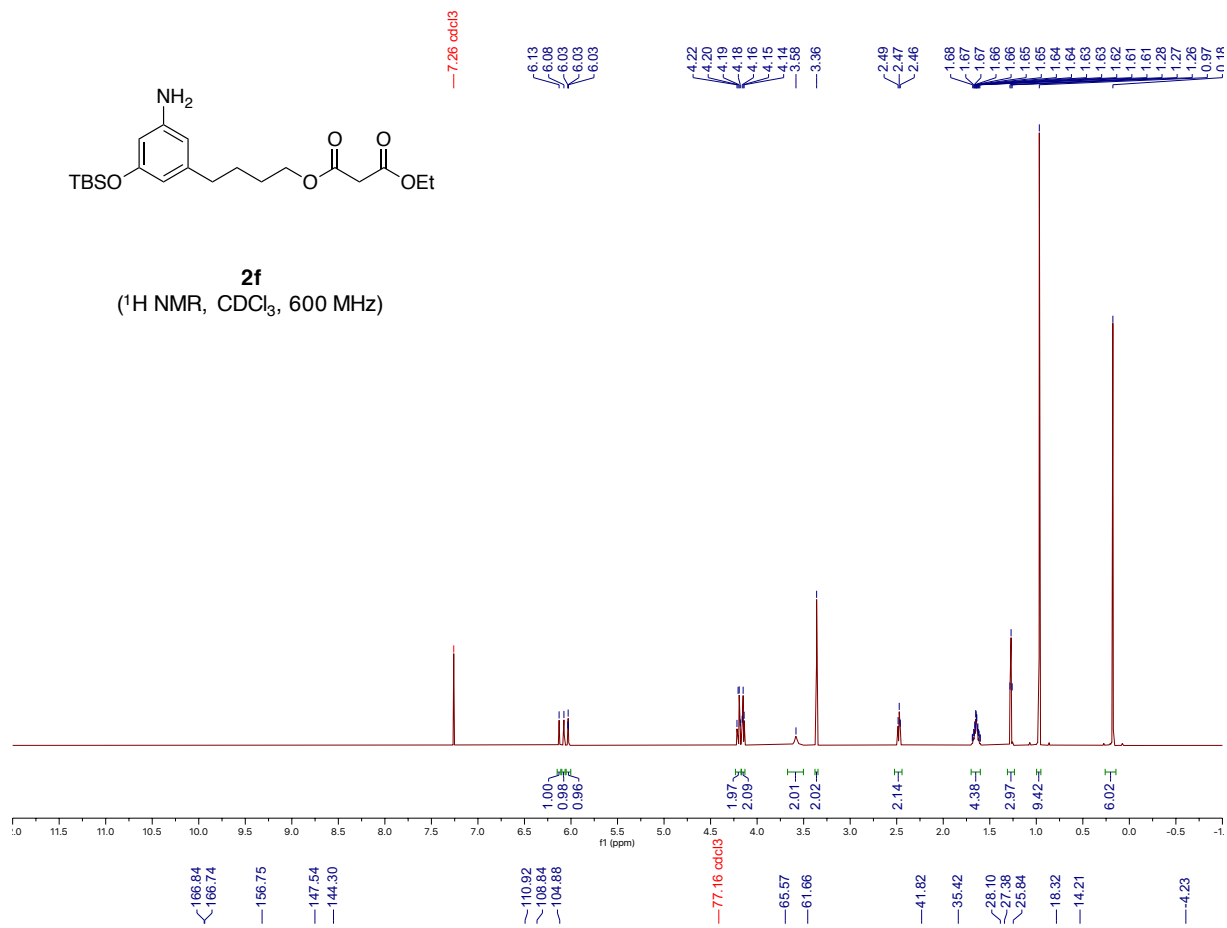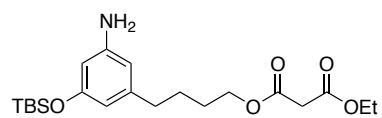

**2f**  
(<sup>13</sup>C NMR, CDCl<sub>3</sub>, 151 MHz)

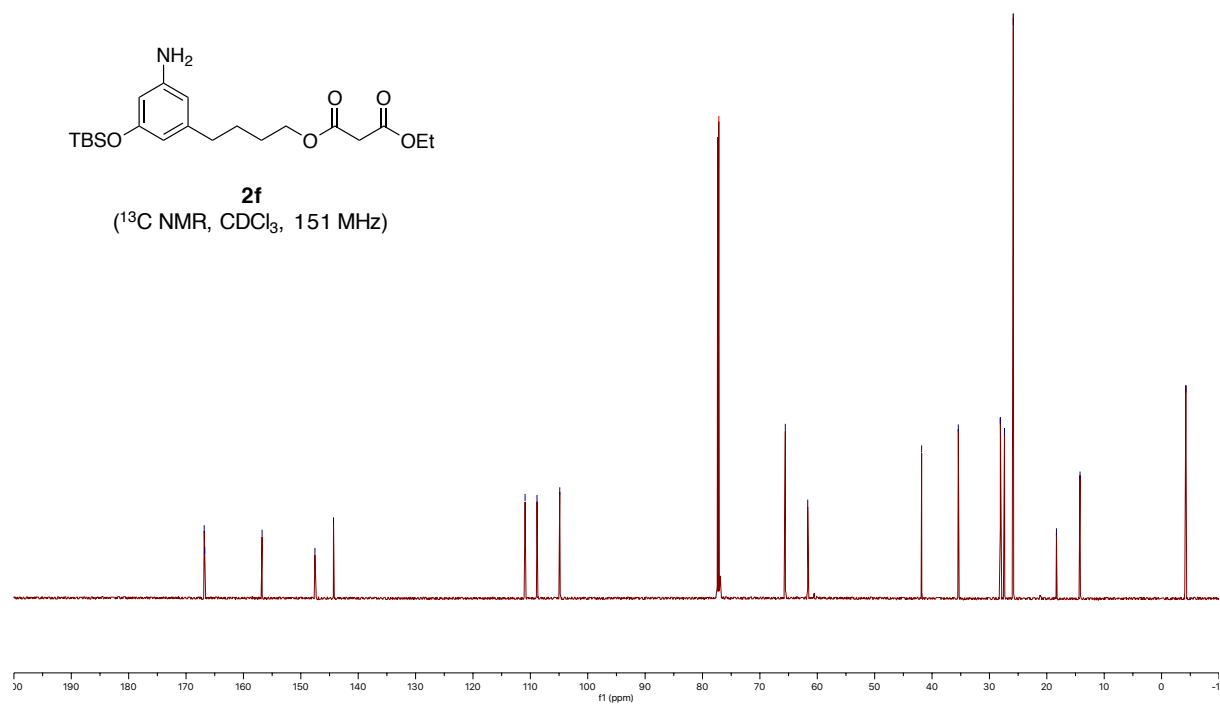

## 7. Bimolecular Competition Experiments: Determination of Chemoselectivity

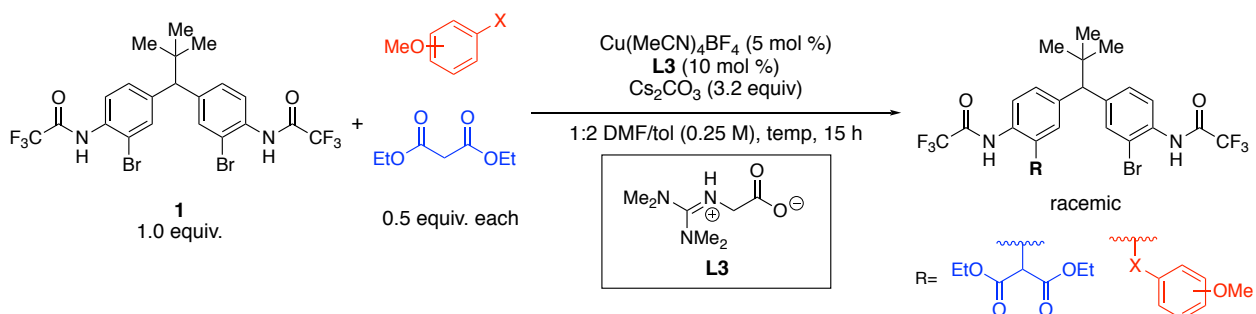

To an oven-dried 5-mL Schlenk flask was added Cs<sub>2</sub>CO<sub>3</sub> (0.2085g, 0.64 mmol, 3.20 equiv). The flask was sealed with a rubber septum and flamed-dried under vacuum. Upon cooling to room temperature, **1** (0.1208 g, 0.2 mmol, 1.00 equiv), Cu(MeCN)<sub>4</sub>BF<sub>4</sub> (0.0031 g, 0.01 mmol, 0.05 equiv), **L3** (0.0035g, 0.02 mmol, 0.10 equiv) and a magnetic stir bar were added to the flask. The flask was sealed with a new rubber septum and further secured with Parafilm®. The flask was connected to vacuum for 5 min and backfilled with N<sub>2</sub>. This process was repeated two additional times. 1:2 DMF/Tol mixture (0.6 mL) was added through the septum, and the mixture was allowed to stir for 15 min at room temperature, after which nucleophiles were added (0.2 mL of a 1.0 M stock solution w.r.t each nucleophile). The solution was left to stir for 15 h at room temperature. The mixture was diluted with EtOAc and transferred to a separatory funnel. The organic layer washed with a solution of saturated NH<sub>4</sub>Cl (aq). The organic layer was separated and the aqueous layer was extracted with EtOAc (5 mL × 3). The organic layer was washed with sat. NaCl (aq) (20 mL). The combined organic layer was then dried over anhydrous Na<sub>2</sub>SO<sub>4</sub>, filtered, and concentrated in vacuo. Yield was determined using <sup>1</sup>H NMR by comparing the relative integration of each substrate's methine peak to an internal standard of 1,4-bis(trimethylsilyl)benzene. (Note: In competition experiments between diethyl malonate and aniline, glacial acetic acid was added to convert all C–N coupled products to cyclodehydrated products following previously reported methods.<sup>2c)</sup>)

7.1 Table S1. Bimolecular competition experiments<sup>a</sup>

| Entry | Nuc                                                                               | Temp (°C) | SM (%) | Mono C–C (%) | Mono C–N (%) | C–C:C–X ratio |
|-------|-----------------------------------------------------------------------------------|-----------|--------|--------------|--------------|---------------|
| 1     | 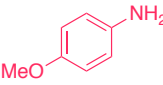 | 23        | 47     | 35           | 5            | 7.0:1         |
| 2     |  | 45        | 37     | 34           | 5            | 7.0:1         |
| 3     |  | 23        | 64     | 31           | -            | 1.:0          |
| 4     |  | 45        | 63     | 34           | -            | 1.:0          |
| 5     |  | 23        | 43     | 28           | 17           | 1.6:1         |
| 6     |  | 45        | 43     | 18           | 30           | 1:1.7         |

[a] Conversion determined using <sup>1</sup>H NMR by comparing the relative integration of each substrate's methine peak to an internal standard of 1,4-bis(trimethylsilyl)benzene.

## 8. Procedures for Cu-catalyzed Intermolecular C–C Coupling

### 8.1 Procedure 4: Cu-catalyzed Intramolecular C–C Coupling with an Achiral Ligand

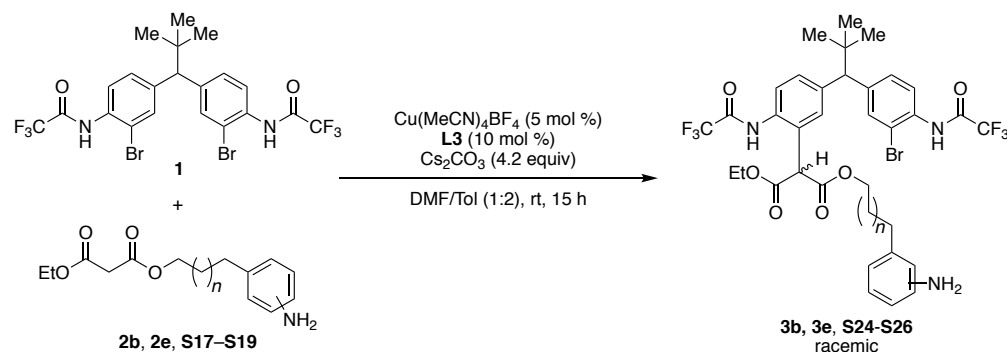

$\text{Cs}_2\text{CO}_3$  (4.20 equiv) was flamed-dried under vacuum in a 5-mL Schlenk flask. Upon cooling to room temperature, **1** (0.1208 g, 0.2 mmol, 1.00 equiv),  $\text{Cu}(\text{MeCN})_4\text{BF}_4$  (0.0031 g, 0.01 mmol, 0.05 equiv), **L3** (0.0035g, 0.02 mmol, 0.10 equiv) and a magnetic stir bar were added to the flask. The flask was sealed with a new rubber septum and further secured with Parafilm M®. The flask was put under vacuum for 5 min and backfilled with  $\text{N}_2$ . This process was repeated two additional times. 1:2 DMF/Tol mixture (0.6 mL) was added through the septum, and the mixture was allowed to stir for 15 min at room temperature, after which the bis-nucleophile (1.0 equiv) in 1:2 DMF/Tol mixture (0.2 mL) was added. The solution was left to stir for 15 h at room temperature. The mixture was diluted with EtOAc and transferred to a separatory funnel. The organic layer washed with saturated  $\text{NH}_4\text{Cl}$  (aq). The organic layer was separated and the aqueous layer was extracted with EtOAc (5 mL  $\times$  3). Combined organic layers were washed with sat.  $\text{NaCl}$  (aq), dried over  $\text{Na}_2\text{SO}_4$ , filtered, and concentrated in vacuo. The crude material was purified by flash chromatography with EtOAc/Hex gradient.

## 8.2 Procedure 5: Preparation of Enantioenriched Diarylmethanes by C–C Coupling

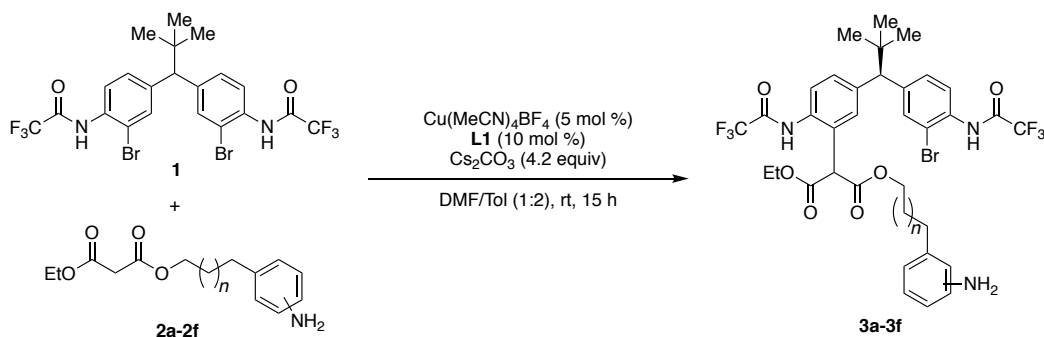

$\text{Cs}_2\text{CO}_3$  (2.4632 g, 7.56 mmol, 4.20 equiv) was flamed-dried under vacuum in a 10-mL Schlenk flask. Upon cooling to room temperature, **1** (1.0875 g, 1.8 mmol, 1.00 equiv),  $\text{Cu}(\text{MeCN})_4\text{BF}_4$  (0.0283 g, 0.09 mmol, 0.05 equiv), **L1** (0.0755 g, 0.18 mmol, 0.10 equiv) and a magnetic stir bar were added to the flask. The flask was sealed with a new rubber septum and further secured with Parafilm M®. The flask was put under vacuum for 5 min and backfilled with  $\text{N}_2$ . This process was repeated two additional times. 1:2 DMF/Tol mixture (6.0 mL) was added through the septum, and the mixture was allowed to stir for 15 min at room temperature, after which the bis-nucleophile **2a-2f** (1.98 mmol, 1.10 equiv) in Tol (0.8 mL) was added. The vial was rinsed with DMF (0.4 mL) and added to the stirring mixture. The reaction mixture was left to stir for 15 h at room temperature. The mixture was diluted with EtOAc (20 mL) and transferred to a separatory funnel. The organic layer washed with saturated  $\text{NH}_4\text{Cl}$  (aq) (20 mL). The organic layer was separated and the aqueous layer was extracted with EtOAc (10 mL  $\times$  3). Combined organic layers were washed with sat.  $\text{NaCl}$  (aq) (50 mL), dried over  $\text{Na}_2\text{SO}_4$ , filtered, and concentrated in vacuo. The crude material was purified by flash chromatography with EtOAc/Hex gradient.

## 8.3 Procedure 6: TBS Deprotection en route to Aminophenol **3f**

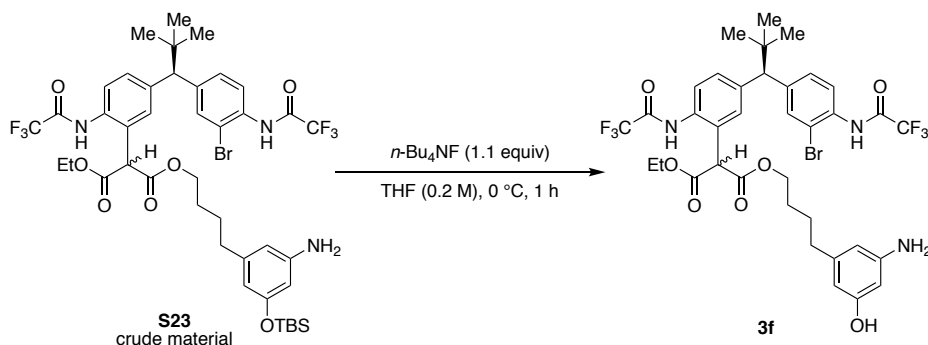

Crude material containing **S23** (~1.8 mmol, 1.00 equiv) was dissolved in THF (9.0 mL, 0.2 M). The solution was cooled to 0 °C.  $n\text{-Bu}_4\text{NF}$  (1.0 M solution in THF, 1.98 mmol, 1.10 equiv, 1.98 mL) was added dropwise to the stirring mixture. Reaction mixture was left to stir at 0 °C for 1 h, until the consumption of starting material was observed by TLC. Reaction mixture was diluted with EtOAc and transferred to a separatory funnel. The

organic layer was washed with 10% citric acid (aq). The aqueous layer was extracted with EtOAc  $\times$  3. Combined organic layers were washed with sat. NaCl (aq), dried over Na<sub>2</sub>SO<sub>4</sub>, filtered and concentrated in vacuo. The crude material was purified by flash chromatography with EtOAc/Hex gradient.

## 8.4 Characterization and Spectra of Linear Precursors

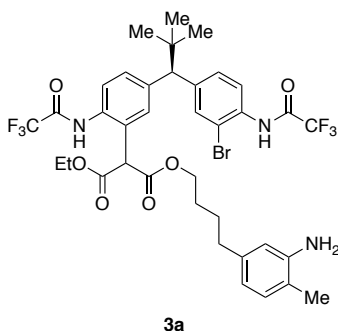

**1-(4-(3-amino-4-methylphenyl)butyl) 3-ethyl 2-(5-((R)-1-(3-bromo-4-(2,2,2-**

**do)phenyl)-2,2-dimethylpropyl)-2-(2,2,2 trifluoroacetamido)phenyl)malonate (3a)** was synthesized from **2a** following **Procedure 5**. Crude material was purified by silica chromatography (0→30→60% EtOAc/Hex) to yield the desired product as a white solid (0.9775 g, 66% yield, 94:6 er). The product is isolated as a 1.0:1 mixture of diastereomers. **TLC** (30% EtOAc/Hex):  $R_f = 0.42$ .

**IR** (FT-ATR,  $\text{cm}^{-1}$ , neat):  $\nu_{\text{max}}$  3382, 2952, 2866, 2287, 2124, 1721, 1531, 1281, 1152, 1028, 759.

**$^1\text{H NMR}$**  (500 MHz,  $\text{CDCl}_3$ )  $\delta$  10.22 (s, 1H), 8.41 (s, 1H), 8.20 (dd,  $J = 8.5, 2.3$  Hz, 1H), 7.79 (d,  $J = 8.4$  Hz, 1H), 7.60 (d,  $J = 1.7$  Hz, 1H), 7.48 (dt,  $J = 8.4, 2.0$  Hz, 2H), 7.43 (d,  $J = 8.6$  Hz, 1H), 7.22 (d,  $J = 1.6$  Hz, 1H), 6.93 (d,  $J = 7.4$  Hz, 1H), 6.46 (d,  $J = 7.9$  Hz, 2H), 4.62 (s, 1H), 4.32 – 4.03 (m, 4H), 3.68&3.68 (s\*, 1H), 3.56 (brs, 2H), 2.46 (td,  $J = 7.5, 2.8$  Hz, 2H), 2.13 (s, 3H), 1.71 – 1.50 (m, 4H), 1.24 (t,  $J = 7.1$  Hz, 3H), 1.01&1.01 (s\*, 9H). (Note: \*indicates overlap of two diastereomeric singlets that may appear as an apparent doublet)

**$^{13}\text{C NMR}$**  (151 MHz,  $\text{CDCl}_3$ )  $\delta$  168.9, 168.8, 168.8, 168.7, 155.6 (q,  $J = 37.3$  Hz), 154.7 (q,  $J = 37.7$  Hz), 144.6, 142.1&142.1, 141.0 &141.0, 140.7, 133.8, 133.7&133.7, 132.6, 131.6, 130.5, 130.4, 129.9&129.8, 125.9, 125.6, 121.7&121.7, 120.0&120.0, 118.8, 116.1 (q,  $J = 288.4$  Hz), 115.7 (q,  $J = 288.4$  Hz), 115.1, 114.0, 66.9&66.9, 63.0&63.0, 62.9&62.9, 57.5, 35.4, 34.9, 29.2, 27.9&27.8, 27.4&27.4, 17.0, 13.9.

**$^{19}\text{F NMR}$**  (471 MHz,  $\text{CDCl}_3$ )  $\delta$  -75.83, -76.03.

**HRMS** (ESI/Q-TOF): Exact mass calculated for  $[\text{C}_{37}\text{H}_{40}\text{BrF}_6\text{N}_3\text{O}_6+\text{H}]^+$  requires  $m/z = 818.2065$ , found  $m/z = 818.2075$ .

**Optical Rotation:**  $\alpha_D^{20} = +15.6^\circ$  ( $c = 0.5$ , MeOH, 94:6 er)

**HPLC** (Chiralpak® AD-H column, 10% IPA/Hexanes eluent, 1.00  $\text{mL min}^{-1}$  flow rate, 25  $^\circ\text{C}$ , 250 nm, 1.0:1 dr): major diastereomers  $t_R = 21.3$  min, 29.9 min; minor diastereomers  $t_R = 23.5$  min, 34.1 min.



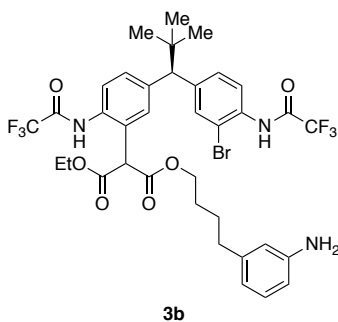

**1-(4-(3-aminophenyl)butyl) 3-ethyl 2-(5-((R)-1-(3-bromo-4-(2,2,2-trifluoroacetamido)phenyl)-2,2-dimethylpropyl)-2-(2,2,2-trifluoroacetamido)phenyl)malonate (3b)** was

synthesized from **2b** following **Procedure 5**. Crude material was purified by silica chromatography (0→30→60% EtOAc/Hex) to yield the desired product as a white solid (0.9392 g, 65% yield, 94:6 er). The product is isolated as a 1.0:1 mixture of diastereomers. **TLC** (30% EtOAc/Hex):  $R_f = 0.39$ .

**IR** (FT-ATR,  $\text{cm}^{-1}$ , neat):  $\nu_{\text{max}}$  3378, 2951, 2288, 2110, 1721, 1531, 1281, 1151, 1027, 903, 606.

**$^1\text{H NMR}$**  (600 MHz,  $\text{CDCl}_3$ ):  $\delta$  10.21 (s, 1H), 8.40 (s, 1H), 8.20 (d,  $J = 8.6$  Hz, 1H), 7.78 (d,  $J = 8.4$  Hz, 1H), 7.59 (s, 1H), 7.47 (d,  $J = 8.3$  Hz, 1H), 7.43 (d,  $J = 8.5$  Hz, 1H), 7.20 (s, 1H), 7.04 (t,  $J = 7.7$  Hz, 1H), 6.52 (d,  $J = 7.7$  Hz, 2H), 6.47 (s, 1H), 4.61 (s, 1H), 4.34 – 4.04 (m, 4H), 3.67 (s, 1H), 2.47 (t,  $J = 7.3$  Hz, 2H), 1.70 – 1.46 (m, 4H), 1.23 (t,  $J = 7.1$  Hz, 3H), 1.00 (s, 9H).

**$^{13}\text{C NMR}$**  (151 MHz,  $\text{CDCl}_3$ ):  $\delta$  168.9, 168.8, 168.8, 168.7, 155.7 (q,  $J = 37.2$  Hz), 154.8 (q,  $J = 37.7$  Hz), 146.2, 143.2, 142.1&142.1, 141.0&141.0, 133.8, 133.7, 132.7, 131.6, 130.5&130.4, 129.9&129.9, 129.4, 125.9, 125.7, 121.7, 119.1, 116.1 (q,  $J = 289.9$  Hz), 115.7 (q,  $J = 288.4$  Hz), 115.5, 114.0, 113.1, 66.9&66.8, 63.1&63.1, 63.0&63.0, 57.6, 35.5, 35.3, 29.2, 27.9&27.9, 27.3&27.3, 14.0.

**$^{19}\text{F NMR}$**  (471 MHz,  $\text{CDCl}_3$ )  $\delta$  -75.82, -76.03.

**HRMS** (ESI/Q-TOF): Exact mass calculated for  $[\text{C}_{36}\text{H}_{38}\text{BrF}_6\text{N}_3\text{O}_6 + \text{H}]^+$  requires  $m/z = 804.1908$ , found  $m/z = 804.1922$ .

**Optical Rotation:**  $\alpha_D^{20} = +15.0^\circ$  ( $c = 0.5$ , MeOH, 94:6 er)

**HPLC:** (Chiralpak® AD-H column, 10% IPA/Hexanes eluent,  $1.00 \text{ mL min}^{-1}$  flow rate,  $25^\circ\text{C}$ , 250 nm, 1.0:1 dr): major diastereomers  $t_R = 22.6$  min, 30.3 min; minor diastereomers  $t_R = 25.3$  min, 38.1 min.

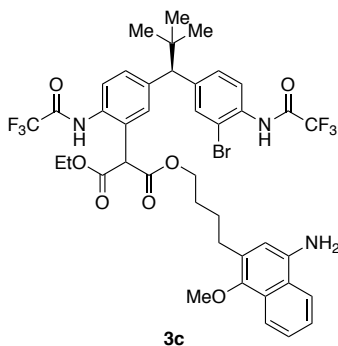

**1-(4-(4-amino-1-methoxynaphthalen-2-yl)butyl) 3-ethyl 2-(5-((R)-1-(3-bromo-4-(2,2,2-trifluoroacetamido)phenyl)-2,2-dimethylpropyl)-2-(2,2,2-trifluoroacetamido)phenyl)malonate (3c)** was synthesized from **2c** following **Procedure 5**. Crude material was purified by silica chromatography (0→35→75% EtOAc/Hex) to yield the desired product as a beige solid (1.1229g, 71% yield, 94:6 er). The product is isolated as a 1.0:1 mixture of diastereomers.

**TLC** (30% EtOAc/Hex):  $R_f = 0.43$ .

**IR** (FT-ATR,  $\text{cm}^{-1}$ , neat):  $\nu_{\text{max}}$  3309, 2952, 2110, 1722, 1531, 1281, 1152, 1030, 764, 606.

**$^1\text{H NMR}$**  (600 MHz,  $\text{CDCl}_3$ )  $\delta$  10.23 (s, 1H), 8.38 (s, 1H), 8.16 (dd,  $J = 8.5, 5.6$  Hz, 1H), 8.03 (d,  $J = 8.2$  Hz, 1H), 7.78 (d,  $J = 8.4$  Hz, 2H), 7.57 (s, 1H), 7.52 – 7.36 (m, 4H), 7.20 (s, 1H), 6.54 (s, 1H), 4.62&4.62 (s\*, 1H), 4.32 – 4.12 (m, 4H), 3.98 (brs, 2H), 3.82 (s, 3H), 3.65&3.64 (s\*, 1H), 2.68 (t,  $J = 7.4$  Hz, 2H), 1.79 – 1.53 (m, 4H), 1.22 (t,  $J = 6.8$  Hz, 3H), 0.98&0.95 (s\*, 9H). (Note: \*indicates overlap of two diastereomeric singlets that may appear as an apparent doublet)

**$^{13}\text{C NMR}$**  (151 MHz,  $\text{CDCl}_3$ )  $\delta$  168.9, 168.8, 168.8, 168.7, 155.7 (q,  $J = 37.8$  Hz), 154.8 (q,  $J = 37.8$  Hz), 146.4, 142.1&142.1, 141.1&141.0, 138.5&138.5, 133.8, 133.7&133.7, 132.7, 131.6, 130.5&130.4, 130.3, 129.9&129.8, 128.6, 126.1&126.1, 125.9, 125.7, 124.7&124.7, 123.9, 122.7, 121.8, 121.4, 116.1 (q,  $J = 288.4$  Hz), 115.7 (q,  $J = 289.9$  Hz), 114.0, 111.5&111.5, 66.9&66.8, 63.1&63.0, 63.0, 62.2, 57.6, 35.4, 29.2&29.1, 29.1&29.1, 28.1&28.1, 26.8&26.8, 14.0.

**$^{19}\text{F NMR}$**  (376 MHz,  $\text{CDCl}_3$ )  $\delta$  -75.83, -75.84, -76.04.

**HRMS** (ESI/Q-TOF): Exact mass calculated for  $[\text{C}_{41}\text{H}_{42}\text{BrF}_6\text{N}_3\text{O}_7 + \text{H}]^+$  requires  $m/z = 884.2172$ , found  $m/z = 884.2190$ .

**Optical Rotation:**  $\alpha_D^{20} = +12.9^\circ$  ( $c = 0.5$ , MeOH, 94:6 er)

**HPLC** (Chiralpak® IB column, 6% EtOH/Hexanes eluent, 1.10 mL  $\text{min}^{-1}$  flow rate, 250 nm, 25 °C, 1.0:1 dr): major diastereomers  $t_R = 42.7$  min, 51.0 min; minor diastereomers  $t_R = 29.9$  min, 32.2 min.

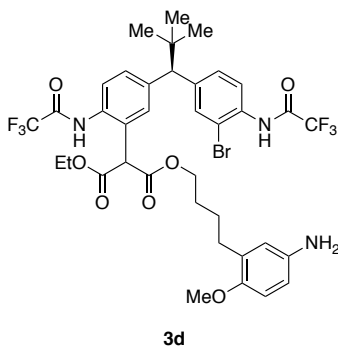

**1-(4-(5-amino-2-methoxyphenyl)butyl) 3-ethyl 2-(5-((*R*)-1-(3-bromo-4-(2,2,2-trifluoroacetamido)phenyl)-2,2-dimethylpropyl)-2-(2,2,2-trifluoroacetamido)phenyl)malonate (3d)** was

synthesized from **2d** following **Procedure 5**. Crude material was purified by silica chromatography (0→40→85% EtOAc/Hex) to yield the desired product as a pale pink solid (1.0358 g, 69% yield, 92:8 er). The product is isolated as a 1.0:1 mixture of diastereomers.

**TLC** (40% EtOAc/Hex):  $R_f = 0.53$ .

**IR** (FT-ATR,  $\text{cm}^{-1}$ , neat):  $\nu_{\text{max}}$  3373, 2952, 2872, 2117, 1720, 1530, 1281, 1152, 1030, 733.

**$^1\text{H NMR}$**  (600 MHz,  $\text{CDCl}_3$ )  $\delta$  10.22 (s, 1H), 8.42 (d,  $J = 11.5$  Hz, 1H), 8.19 (dd,  $J = 8.4, 4.8$  Hz, 1H), 7.78 (d,  $J = 8.4$  Hz, 1H), 7.59 (s, 1H), 7.47 (d,  $J = 8.2$  Hz, 1H), 7.43 (d,  $J = 8.4$  Hz, 1H), 7.21 (s, 1H), 6.65 (d,  $J = 8.5$  Hz, 1H), 6.51 (d,  $J = 8.4$  Hz, 1H), 6.46 (s, 1H), 4.62 (s, 1H), 4.29 – 4.10 (m, 4H), 3.71 (s, 3H), 3.67 (s, 1H), 3.28 (brs, 2H), 2.50 (t,  $J = 7.4$  Hz, 2H), 1.63 (q,  $J = 6.6$  Hz, 2H), 1.57 – 1.49 (m, 2H), 1.23 (t,  $J = 7.1$  Hz, 3H), 1.01 & 1.00 (s\*, 9H). (Note: \* indicates overlap of two diastereomeric singlets that may appear as an apparent doublet)

**$^{13}\text{C NMR}$**  (151 MHz,  $\text{CDCl}_3$ )  $\delta$  168.9, 168.8, 168.8, 168.7, 155.6 (q,  $J = 37.3$  Hz), 154.8 (q,  $J = 37.8$  Hz), 150.9, 142.1 & 142.1, 141.0, 139.7 & 139.7, 133.8, 132.7, 131.6, 131.3, 130.4, 129.9 & 129.9, 125.9, 125.6, 121.8 & 121.8, 117.8, 116.1 (q,  $J = 288.4$  Hz), 115.7 (q,  $J = 289.9$  Hz), 114.1, 114.0, 113.6, 111.9 & 111.9, 67.0 & 67.0, 63.0, 57.6, 56.1, 35.5, 29.6 & 29.6, 29.2, 28.0 & 28.0, 26.0 & 26.0, 14.0.

**$^{19}\text{F NMR}$**  (376 MHz,  $\text{CDCl}_3$ )  $\delta$  -75.79, -75.81, -76.00.

**HRMS** (ESI/Q-TOF): Exact mass calculated for  $[\text{C}_{37}\text{H}_{40}\text{BrF}_6\text{N}_3\text{O}_7 + \text{H}]^+$  requires  $m/z = 834.2014$ , found  $m/z = 834.2022$ .

**Optical Rotation**:  $\alpha_D^{20} = +14.5^\circ$  ( $c = 0.5$ , MeOH, 92:8 er)

**HPLC** (Chiralpak® AD-H column, 7% IPA/Hexanes eluent, 1.25 mL  $\text{min}^{-1}$  flow rate, 250 nm, 25 °C, 1.0:1 dr): major diastereomers  $t_R = 47.1$  min, 62.3 min, minor diastereomers  $t_R = 53.4$  min, 93.5 min.

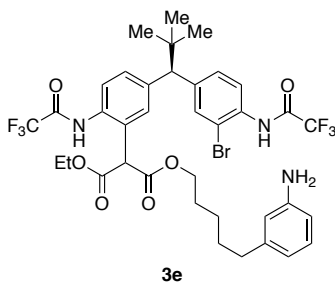

**1-(5-(3-aminophenyl)pentyl) 3-ethyl 2-(5-((R)-1-(3-bromo-4-(2,2,2-trifluoroacetamido)phenyl)-2,2-dimethylpropyl)-2-(2,2,2-trifluoroacetamido)phenyl)malonate (3e)** was synthesized

from **2e** following **Procedure 5**. Crude material was purified by silica chromatography (0→30→60% EtOAc/Hex) to yield the desired product as a beige solid (0.7228 g, 59% yield, 90:10 er). The product is isolated as a 1.0:1 mixture of diastereomers.

**TLC** (30% EtOAc/Hex):  $R_f = 0.38$ .

**IR** (FT-ATR,  $\text{cm}^{-1}$ , neat):  $\nu_{\text{max}}$  3374, 3310, 2952, 2864, 2104, 1722, 1530, 1281, 1152, 1028, 749.

**$^1\text{H NMR}$**  (600 MHz,  $\text{CDCl}_3$ )  $\delta$  10.20 (s, 1H), 8.38 (s, 1H), 8.21 (t,  $J = 8.1$  Hz, 1H), 7.78 (d,  $J = 8.4$  Hz, 1H), 7.60 (s, 1H), 7.48 (d,  $J = 8.4$  Hz, 1H), 7.45 (d,  $J = 8.6$  Hz, 1H), 7.21 (s, 1H), 7.05 (td,  $J = 7.6, 2.4$  Hz, 1H), 6.55 – 6.50 (m, 2H), 6.47 (d,  $J = 10.2$  Hz, 1H), 4.62 (s, 1H), 4.27 – 4.07 (m, 4H), 3.68 (s, 1H), 3.61 (brs, 2H), 2.44 (dt,  $J = 11.1, 7.7$  Hz, 2H), 1.68 – 1.50 (m, 4H), 1.35 – 1.21 (m, 5H), 1.02 (s, 9H).

**$^{13}\text{C NMR}$**  (126 MHz,  $\text{CDCl}_3$ )  $\delta$  168.8, 168.7, 155.6 (q,  $J = 37.3$  Hz), 154.8 (q,  $J = 37.8$  Hz), 146.5&146.5, 143.6, 142.1&142.1, 141.0, 133.8, 133.8, 132.7, 131.7, 130.5, 130.4, 129.9&129.9, 129.3, 125.9, 125.7, 121.8&121.7, 118.9, 116.1 (q,  $J = 241.9$  Hz), 115.7 (q,  $J = 240.7$  Hz), 115.4, 114.0&114.0, 112.8, 66.9&66.9, 63.0&63.0, 57.6&57.6, 35.8, 35.5, 30.8, 29.2, 28.2&28.2, 25.4, 14.0.

**$^{19}\text{F NMR}$**  (376 MHz,  $\text{CDCl}_3$ )  $\delta$  -75.84, -76.05.

**HRMS** (ESI/Q-TOF): Exact mass calculated for  $[\text{C}_{37}\text{H}_{40}\text{BrF}_6\text{N}_3\text{O}_6+\text{H}]^+$  requires  $m/z = 818.2065$ , found  $m/z = 818.2079$ .

**Optical Rotation:**  $\alpha_D^{20} = +14.6^\circ$  ( $c = 0.5$ , MeOH, 90:10 er)

**HPLC:** (Chiralpak® AD-H column, 4% EtOH/Hexanes eluent, 1.25  $\text{mL min}^{-1}$  flow rate, 254 nm, 20 °C, 1.0:1 dr): major diastereomers  $t_R = 41.8$  min, 49.9 min; minor diastereomers  $t_R = 37.9$  min, 75.2 min.

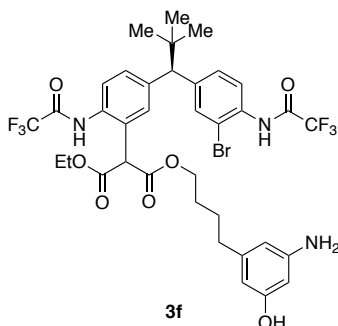

**1-(4-(3-amino-5-hydroxyphenyl)butyl) 3-ethyl 2-(5-((*R*)-1-(3-bromo-4-(2,2,2-trifluoroaceta**  
**mido)phenyl)-2,2-dimethylpropyl)-2-(2,2,2-trifluoroacetamido)phenyl)malonate (3f)**  
 was

synthesized from **2f** following **Procedure 5** followed by **Procedure 6**. Crude material was purified by silica chromatography (0→40→80% EtOAc/Hex) to yield the desired product as a pink solid (0.4895 g, 60% yield, 93:7 er). The product is isolated as a 1.0:1 mixture of diastereomers.

**TLC** (50% EtOAc/Hex):  $R_f = 0.46$ .

**IR** (FT-ATR,  $\text{cm}^{-1}$ , neat):  $\nu_{\text{max}}$  3382, 2922, 2855, 2293, 1736, 1458, 1283, 1158, 1028, 908, 734.

**$^1\text{H NMR}$**  (600 MHz,  $\text{CDCl}_3$ )  $\delta$  10.26 (s, 1H), 8.55 – 8.42 (m, 1H), 8.16 (dd, 1H), 7.77 (dd,  $J = 8.4, 2.1$  Hz, 1H), 7.50 – 7.43 (m, 1H), 7.41 (ddd,  $J = 13.6, 8.6, 1.7$  Hz, 1H), 7.21 (dd,  $J = 12.4, 1.7$  Hz, 1H), 6.02 – 6.00 (m, 2H), 5.94 (d,  $J = 17.1$  Hz, 1H), 4.63&4.62 (s\*, 1H), 4.33 – 4.07 (m, 4H), 3.66 (s, 1H), 2.36 (dt,  $J = 12.6, 7.4$  Hz, 2H), 1.58 (dq,  $J = 13.8, 6.7$  Hz, 2H), 1.52 – 1.44 (m, 2H), 1.25 (td,  $J = 7.1, 3.3$  Hz, 3H), 1.00&0.99 (s\*, 9H). (Note: \*indicates overlap of two diastereomeric singlets that may appear as an apparent doublet)

**$^{13}\text{C NMR}$**  (151 MHz,  $\text{CDCl}_3$ )  $\delta$  169.0, 169.0, 168.7, 168.7, 156.9&156.8, 155.8 (q,  $J = 37.5$  Hz), 154.8 (q,  $J = 37.8$  Hz), 147.8&147.7, 144.5&144.5, 142.2&142.1, 141.2, 133.9&133.8, 133.7, 132.5&132.5, 131.6&131.6, 130.6&130.5, 129.8&129.8, 125.9, 125.7, 122.0&121.8, 114.2&114.1, 108.2&108.1, 106.1&106.1, 100.1&100.1, 66.9&66.8, 63.1, 63.0, 57.6&57.6, 35.4&35.4, 35.0&35.0, 29.2&29.2, 27.7&27.6, 27.0&26.9, 13.96.

**$^{19}\text{F NMR}$**  (471 MHz,  $\text{CDCl}_3$ ): -75.81, -75.82, -76.01.

**HRMS** (ESI/Q-TOF): Exact mass calculated for  $[\text{C}_{36}\text{H}_{38}\text{BrF}_6\text{N}_3\text{O}_7 + \text{H}]^+$  requires  $m/z = 820.1857$ , found  $m/z = 820.1890$ .

**Optical Rotation:**  $\alpha_D^{20} = +13.1^\circ$  ( $c = 0.5$ , MeOH, 93:7 er)

**HPLC** (Chiralpak® AD-H column, 16% IPA/Hexanes eluent, 1.25 mL  $\text{min}^{-1}$  flow rate, 250 nm, 25 °C, 1.0:1 dr): major diastereomers  $t_R = 12.2$  min, 19.4 min; minor diastereomers  $t_R = 13.9$  min, 28.0 min.

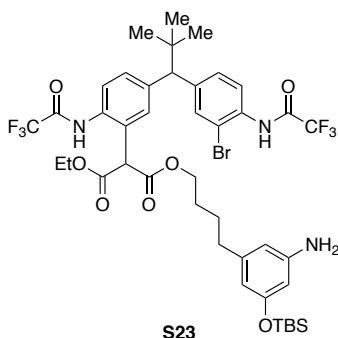

**1-(4-(3-amino-5-((*tert*-butyldimethylsilyl)oxy)phenyl)butyl) 3-ethyl 2-(5-(1-(3-bromo-4-(2,2,2-trifluoroacetamido)phenyl)-2,2-dimethylpropyl)-2-(2,2,2-trifluoroacetamido)phenyl)**

**malonate (S23)** was prepared from **3f** using **Procedure 4**. Crude material was purified by silica chromatography (0→25→60% EtOAc/Hex) to yield **S23** as a white solid (0.1007 g, 54% yield). **S23** was synthesized to prepare the authentic standard of **4f**.

**TLC** (30% EtOAc/Hex):  $R_f = 0.44$ .

**IR** (FT-ATR,  $\text{cm}^{-1}$ , neat):  $\nu_{\text{max}}$  3436, 3233, 2931, 2860, 2115, 1728, 1660, 1387, 1255, 1153, 1094, 838, 660.

**$^1\text{H}$  NMR** (500 MHz,  $\text{CDCl}_3$ )  $\delta$  10.22 (s, 1H), 8.42 (s, 1H), 8.19 (d,  $J = 8.5$  Hz, 1H), 7.78 (d,  $J = 8.3$  Hz, 1H), 7.60 (s, 1H), 7.52 – 7.46 (m, 1H), 7.44 (d,  $J = 8.5$  Hz, 1H), 7.22 (s, 1H), 6.08 (s, 1H), 6.05 (s, 1H), 6.03 (s, 1H), 4.63 (s, 1H), 4.27 – 4.08 (m, 4H), 3.68 (s, 1H), 3.57 (brs, 2H), 2.41 (t,  $J = 7.1$  Hz, 2H), 1.66 – 1.59 (m, 2H), 1.57 – 1.49 (m, 2H), 1.23 (t,  $J = 7.1$  Hz, 3H), 1.01 (s, 9H), 0.97 (s, 9H), 0.18 (s, 6H).

**$^{13}\text{C}$  NMR** (126 MHz,  $\text{CDCl}_3$ )  $\delta$  168.9, 168.8, 168.8, 168.7, 156.7, 155.6 (q,  $J = 37.3$  Hz), 154.7 (q,  $J = 37.7$  Hz), 147.5, 144.1, 142.1&142.1, 141.0, 133.8, 133.7, 132.6, 131.6, 130.5&130.4, 129.9&129.8, 125.9, 125.6, 121.8, 116.1 (q,  $J = 288.5$  Hz), 115.7 (q,  $J = 288.5$  Hz), 114.0&114.0, 110.9, 108.8, 104.9, 66.9&66.8, 63.0&63.0, 62.9&62.9, 57.5, 35.4, 35.3, 29.1, 27.8&27.8, 27.2&27.2, 25.8, 18.3, 13.9, -4.3.

**$^{19}\text{F}$  NMR** (471 MHz,  $\text{CDCl}_3$ )  $\delta$  -75.82, -75.83, -76.02.

**HRMS** (ESI/Q-TOF): Exact mass calculated for  $[\text{C}_{42}\text{H}_{52}\text{BrF}_6\text{N}_3\text{O}_7\text{Si} + \text{H}]^+$  requires  $m/z = 932.2740$ , found  $m/z = 932.2746$ .

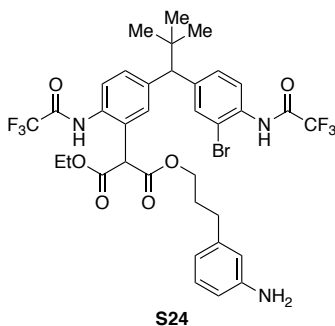

**1-(3-(3-aminophenyl)propyl) 3-ethyl 2-(5-(1-(3-bromo-4-(2,2,2-trifluoroacetamido)phenyl)-2,2-dimethylpropyl)-2-(2,2,2-trifluoroacetamido)phenyl)malonate (S24)** was synthesized from S17 following **Procedure 4**. Crude material was purified by silica chromatography (0→40→80% EtOAc/Hex) to yield the desired product as a white solid (0.3641 g, 67% yield).

**TLC** (30% EtOAc/Hex):  $R_f$  = 0.42.

**IR** (FT-ATR, cm<sup>-1</sup>, neat):  $\nu_{\max}$  3383, 2962, 2204, 2103, 1720, 1604, 1531, 1281, 1153, 1027, 734.

**<sup>1</sup>H NMR** (400 MHz, CDCl<sub>3</sub>)  $\delta$  10.24 (s, 1H), 8.40 (s, 1H), 8.17 (t,  $J$  = 8.1 Hz, 1H), 7.85 – 7.77 (m, 1H), 7.60 (dd,  $J$  = 5.5, 1.9 Hz, 1H), 7.53 – 7.48 (m, 1H), 7.47 – 7.41 (m, 1H), 7.25 (dd,  $J$  = 4.9, 2.6 Hz, 2H), 7.02 (td,  $J$  = 7.7, 3.7 Hz, 1H), 6.53 – 6.49 (m, 1H), 6.48 – 6.43 (m, 1H), 6.36 (d,  $J$  = 8.3 Hz, 1H), 4.65&4.65 (s\*, 1H), 4.32 – 4.06 (m, 4H), 3.73 (brs, 2H), 3.70 (s, 1H), 2.44 (q,  $J$  = 7.5 Hz, 2H), 1.93–1.79 (m, 2H), 1.25 (t,  $J$  = 7.1, 3H), 1.03&1.02 (s\*, 9H). (Note: \*indicates overlap of two diastereomeric singlets that may appear as an apparent doublet)

**<sup>13</sup>C NMR** (101 MHz, CDCl<sub>3</sub>)  $\delta$  168.8, 168.8, 168.7, 155.7 (q,  $J$  = 37.4 Hz), 154.7 (q,  $J$  = 38.0 Hz), 146.4&146.3, 142.1, 141.9, 141.1&141.1, 133.8&133.7, 133.7, 132.6&132.6, 131.6&131.6, 130.5&130.4, 129.8&129.8, 129.5&129.4, 125.9, 125.7&125.7, 121.8, 118.9, 116.1 (q,  $J$  = 289.9 Hz), 115.7 (q,  $J$  = 289.9 Hz), 115.4, 114.1, 113.2, 66.0, 63.1, 63.0, 57.5, 35.4&35.4, 31.7&31.7, 29.7, 29.2, 14.0.

**<sup>19</sup>F NMR** (376 MHz, CDCl<sub>3</sub>)  $\delta$  -75.84, -76.04.

**HRMS** (ESI/Q-TOF): Exact mass calculated for [C<sub>35</sub>H<sub>36</sub>BrF<sub>6</sub>N<sub>3</sub>O<sub>6</sub> + H]<sup>+</sup> requires  $m/z$  = 790.1751, found  $m/z$  = 790.1746.

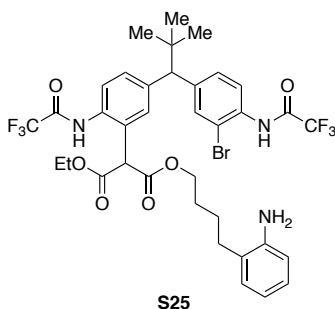

**1-(4-(2-aminophenyl)butyl) 3-ethyl 2-(5-(1-(3-bromo-4-(2,2,2-trifluoroacetamido)phenyl)-2,2-dimethylpropyl)-2-(2,2,2-trifluoroacetamido)phenyl)malonate (S25)** was synthesized from **S18** following **Procedure 4**. Crude material was purified by silica chromatography (0→30→60% EtOAc/Hex) to yield the desired product as a white solid.

**Yield:** 84% (0.1347 g)

**TLC** (30% EtOAc/Hex):  $R_f$ =0.39.

**IR** (FT-ATR,  $\text{cm}^{-1}$ , neat):  $\nu_{\text{max}}$  3386, 3021, 2966, 1968, 1737, 1531, 1283, 1215, 1158, 1030, 903, 667.

**$^1\text{H}$  NMR** (600 MHz,  $\text{CDCl}_3$ )  $\delta$  10.21 (s, 1H), 8.40 (s, 1H), 8.19 (d,  $J$  = 8.5 Hz, 1H), 7.77 (d,  $J$  = 8.4 Hz, 1H), 7.59 (s, 1H), 7.48 (d,  $J$  = 8.4 Hz, 1H), 7.43 (d,  $J$  = 8.5 Hz, 1H), 7.22 (brs, 1H), 7.02 (t,  $J$  = 7.6 Hz, 1H), 6.98 – 6.93 (m, 1H), 6.70 (td,  $J$  = 7.4, 3.9 Hz, 1H), 6.65 (d,  $J$  = 7.9 Hz, 1H), 4.64&4.63 (s\*, 1H), 4.31 – 4.10 (m, 4H), 3.68&3.67 (s\*, 1H), 3.43 (brs, 2H), 2.43 (t,  $J$  = 7.7 Hz, 2H), 1.68 (p,  $J$  = 6.6 Hz, 2H), 1.57 (p,  $J$  = 7.4 Hz, 2H), 1.24 (t,  $J$  = 7.1 Hz, 3H), 1.01&1.00 (s\*, 9H). (Note: \*indicates overlap of two diastereomeric singlets that may appear as an apparent doublet)

**$^{13}\text{C}$  NMR** (151 MHz,  $\text{CDCl}_3$ ):  $\delta$  168.9, 168.9, 168.8, 168.7, 155.7 (q,  $J$  = 37.8 Hz), 154.8 (q,  $J$  = 37.8 Hz), 144.1, 142.1&142.0, 141.1&141.1, 133.7, 133.7, 132.6, 131.6, 130.5&130.4, 129.9& 129.8, 129.5&129.5, 127.2&127.2, 126.0&126.0, 125.8&125.7, 121.7, 118.9&118.9, 116.1 (q,  $J$  = 288.4 Hz), 115.8\*, 115.8\*, 115.7 (q,  $J$  = 288.4 Hz), 114.0\*, 114.0\*, 66.7\*, 66.7\*, 63.1\*, 63.1\*, 63.0&62.9, 57.5&57.5, 35.4, 30.7, 29.2&29.1, 28.2&28.2, 24.8, 13.9.

**$^{19}\text{F}$  NMR** (471 MHz,  $\text{CDCl}_3$ ):  $\delta$  -75.83, -76.03.

**HRMS** (ESI/Q-TOF): Exact mass calculated for  $[\text{C}_{36}\text{H}_{38}\text{BrF}_6\text{N}_2\text{O}_6 + \text{H}]^+$  requires  $m/z$  = 804.1908, found  $m/z$  = 804.1905.



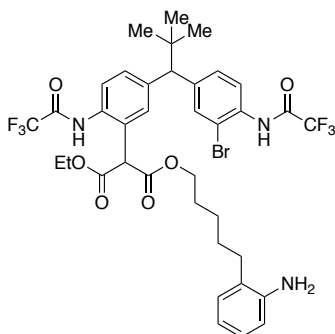

S26

**1-(5-(2-aminophenyl)pentyl) 3-ethyl 2-(5-(1-(3-bromo-4-(2,2,2-trifluoroacetamido)phenyl)-2,2-dimethylpropyl)-2-(2,2,2-trifluoroacetamido)phenyl)malonate (S26)** was synthesized from **S19** following **Procedure 4**. Crude material was purified by silica chromatography (0→30→60% EtOAc/Hex) to yield the desired product as a white solid (0.4192 g, 60% yield).

**TLC** (40% EtOAc/Hex):  $R_f = 0.59$ .

**IR** (FT-ATR,  $\text{cm}^{-1}$ , neat):  $\nu_{\text{max}}$  3384, 2952, 2864, 2381, 2201, 1982, 1720, 1531, 1281, 1151, 1028, 750.

**$^1\text{H NMR}$**  (600 MHz,  $\text{CDCl}_3$ )  $\delta$  10.23 (s, 1H), 8.39 (d,  $J = 9.5$  Hz, 1H), 8.20 (t,  $J = 7.6$  Hz, 1H), 7.78 (d,  $J = 8.4$  Hz, 1H), 7.60 (s, 1H), 7.48 (d,  $J = 8.3$  Hz, 1H), 7.44 (d,  $J = 8.5$  Hz, 1H), 7.22 (s, 1H), 7.05 – 7.00 (m, 1H), 6.98 (t,  $J = 6.6$  Hz, 1H), 6.72 (t,  $J = 6.8$  Hz, 1H), 6.68 – 6.63 (m, 1H), 4.63 (s, 1H), 4.28 – 4.07 (m, 4H), 3.68 (s, 1H), 3.06 (brs, 2H), 2.47 – 2.36 (m, 2H), 1.66 – 1.51 (m, 4H), 1.35 – 1.28 (m, 2H), 1.27 – 1.22 (m, 3H), 1.02 (s, 9H).

**$^{13}\text{C NMR}$**  (151 MHz,  $\text{CDCl}_3$ ):  $\delta$  168.9, 168.8, 168.8, 168.7, 155.6 (q,  $J = 37.4$  Hz), 154.8 (q,  $J = 37.7$  Hz), 144.1, 142.1&142.1, 141.0, 133.8&133.8, 133.8, 132.6, 131.6, 130.5&130.4, 129.9&129.8, 129.5, 127.1, 126.5, 125.9, 125.7, 121.8&121.7, 118.9, 116.1 (q,  $J = 288.4$  Hz), 115.7 (q,  $J = 288.4$  Hz), 115.8, 114.1&114.0, 66.8, 63.1, 63.0, 57.6, 35.5, 31.2, 29.2, 28.2, 25.7, 14.0.

**$^{19}\text{F NMR}$**  (471 MHz,  $\text{CDCl}_3$ )  $\delta$  -75.82, -76.03.

**HRMS** (ESI/Q-TOF): Exact mass calculated for  $[\text{C}_{37}\text{H}_{40}\text{BrF}_6\text{N}_2\text{O}_6 + \text{H}]^+$  requires  $m/z = 815.2065$ , found  $m/z = 815.2059$ .

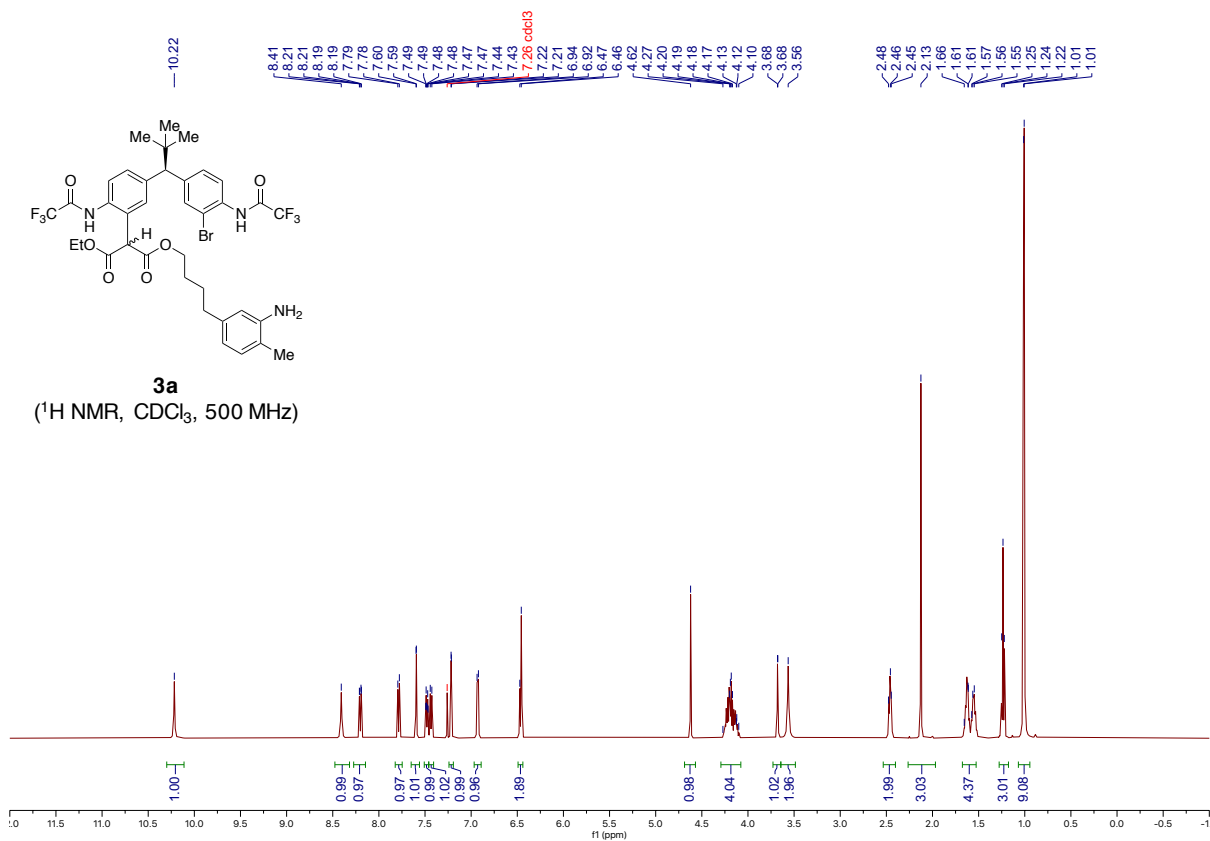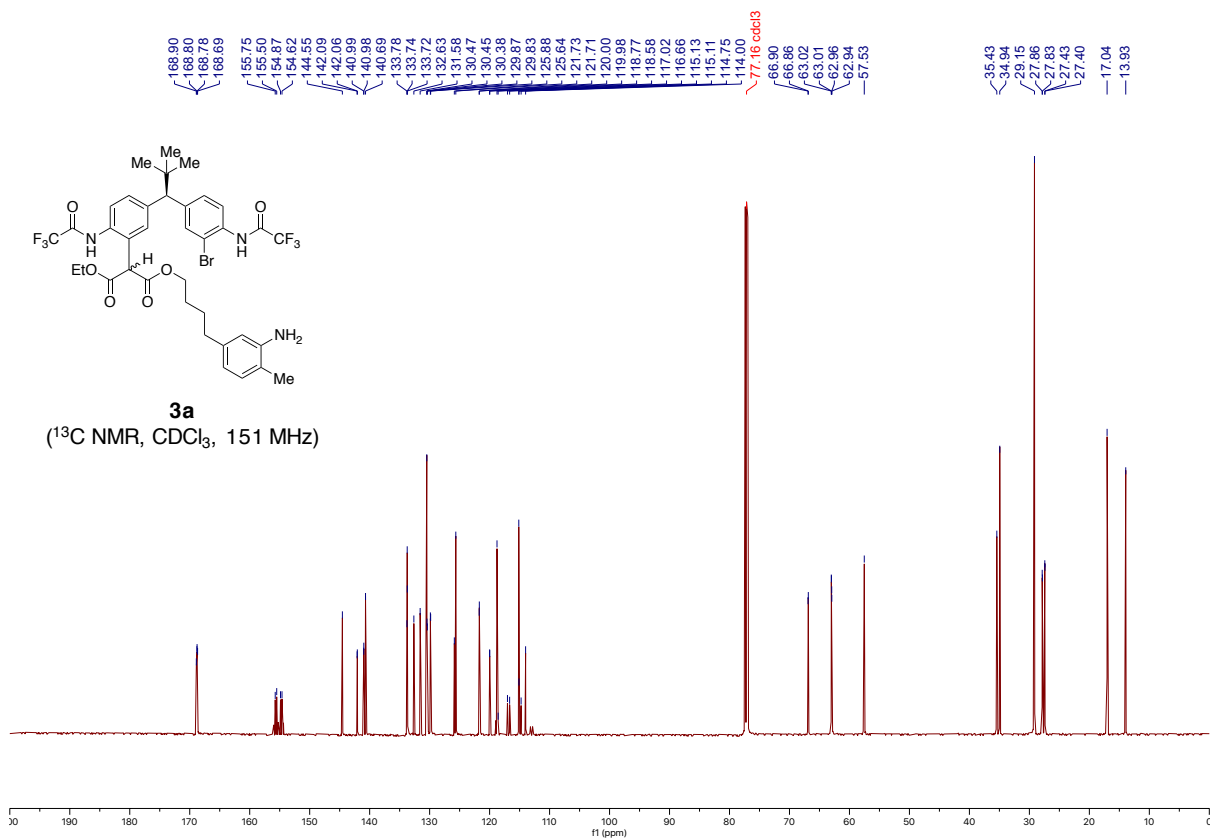

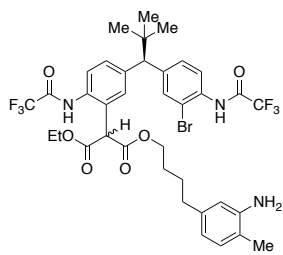

**3a**  
(<sup>19</sup>F NMR, CDCl<sub>3</sub>, 471 MHz)

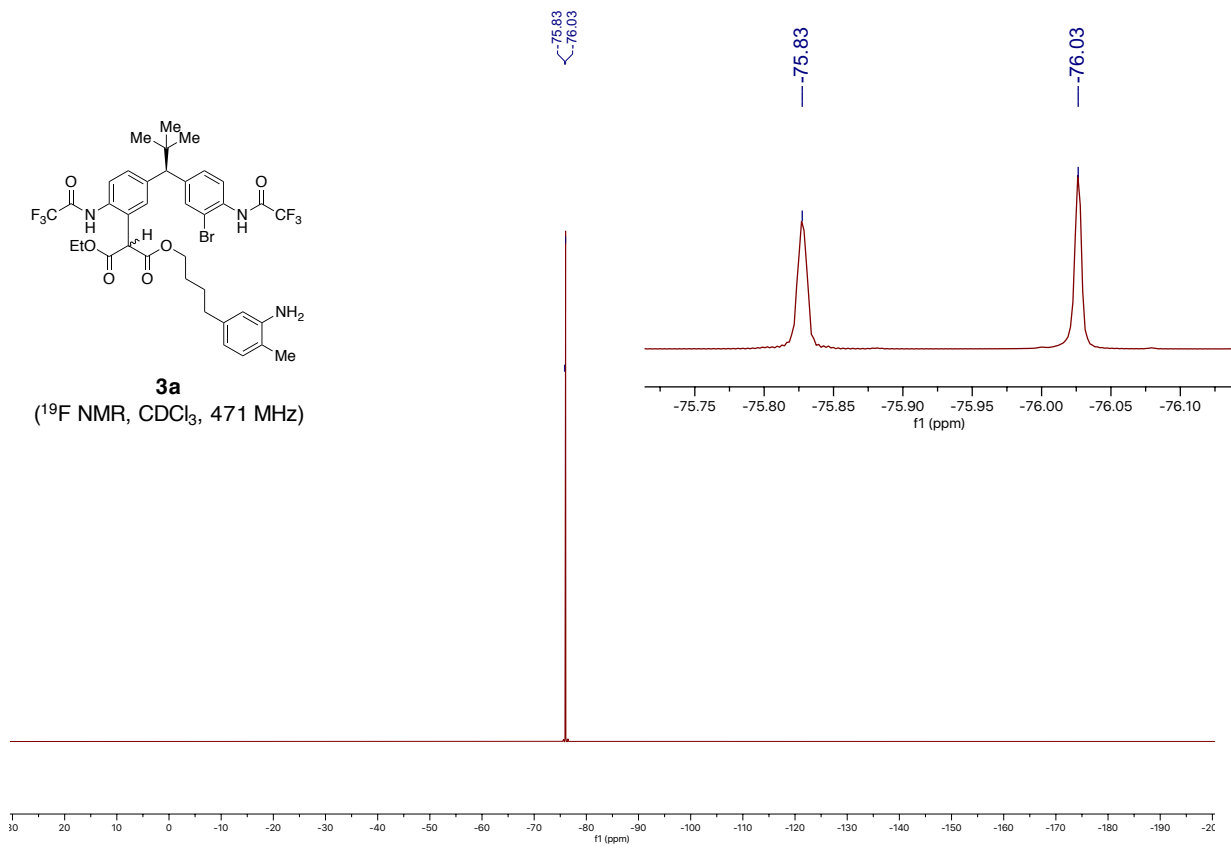

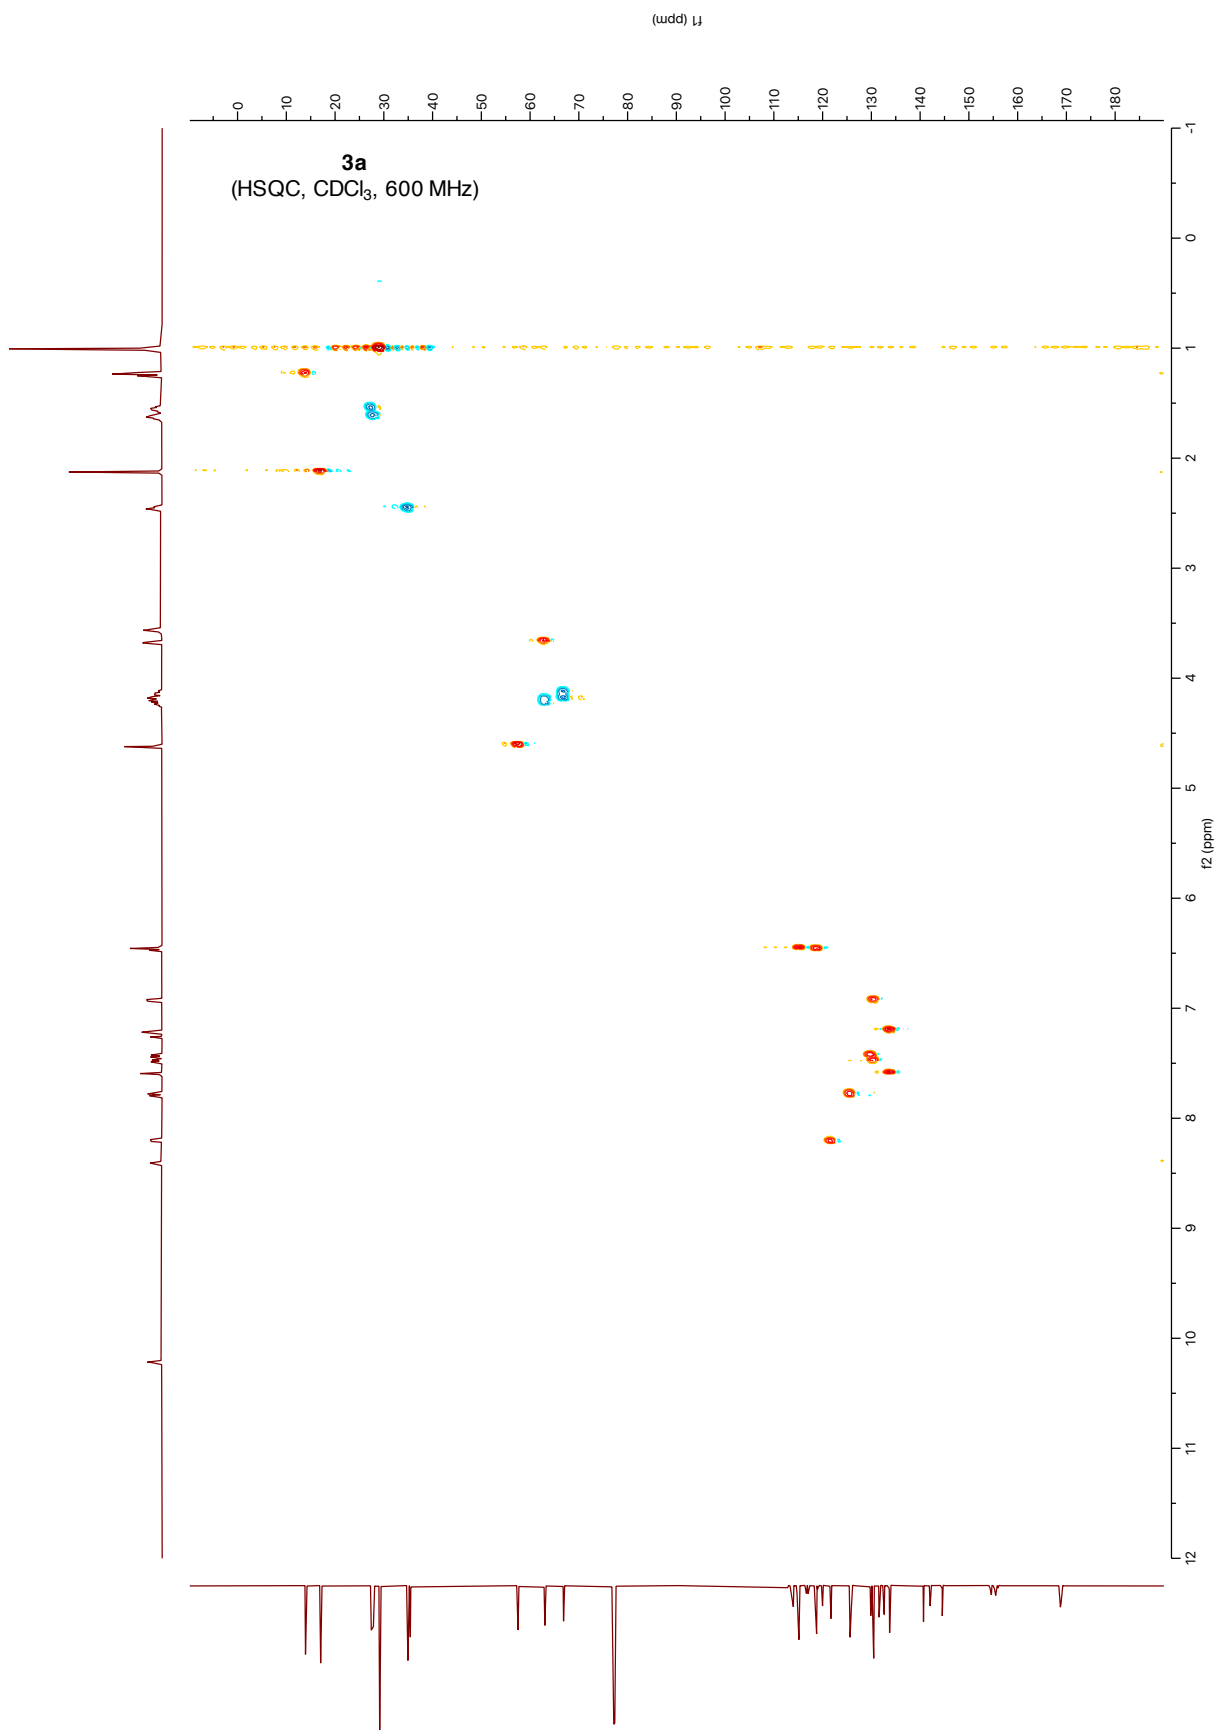

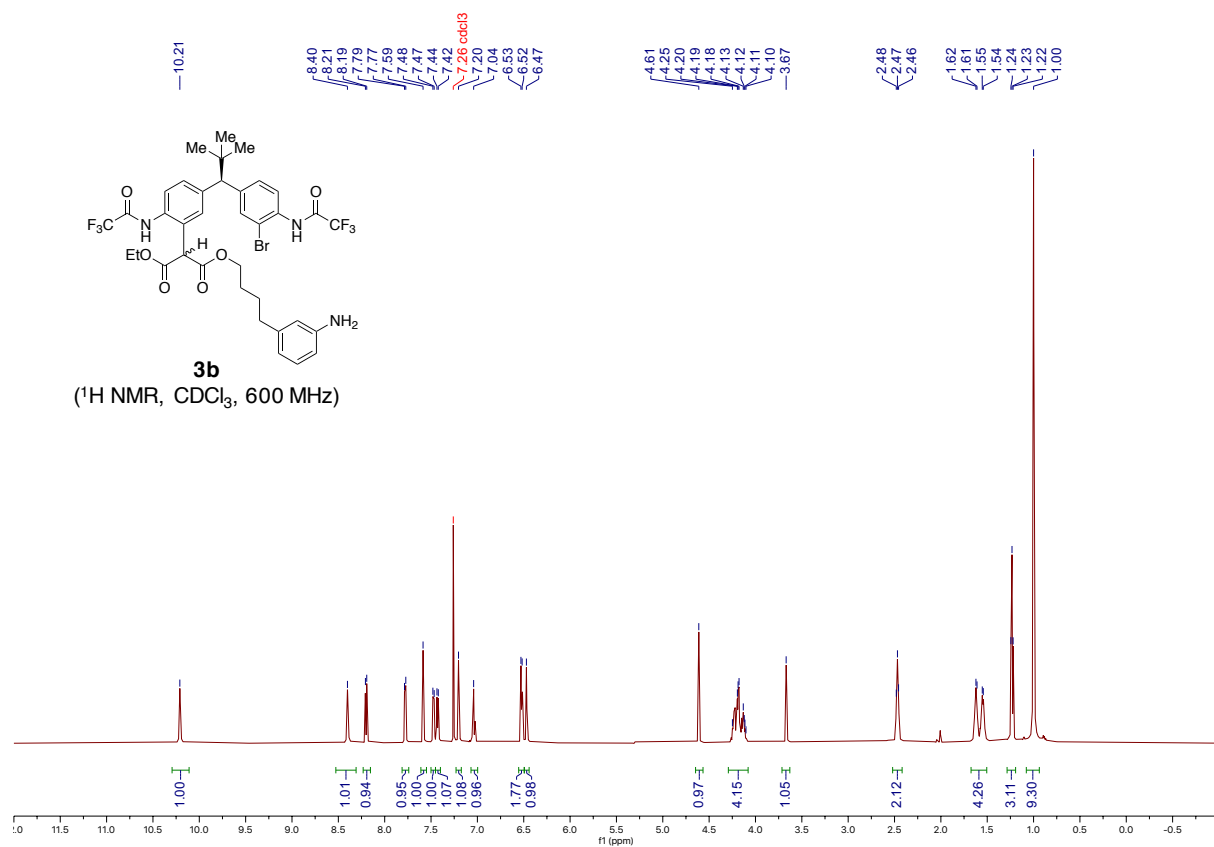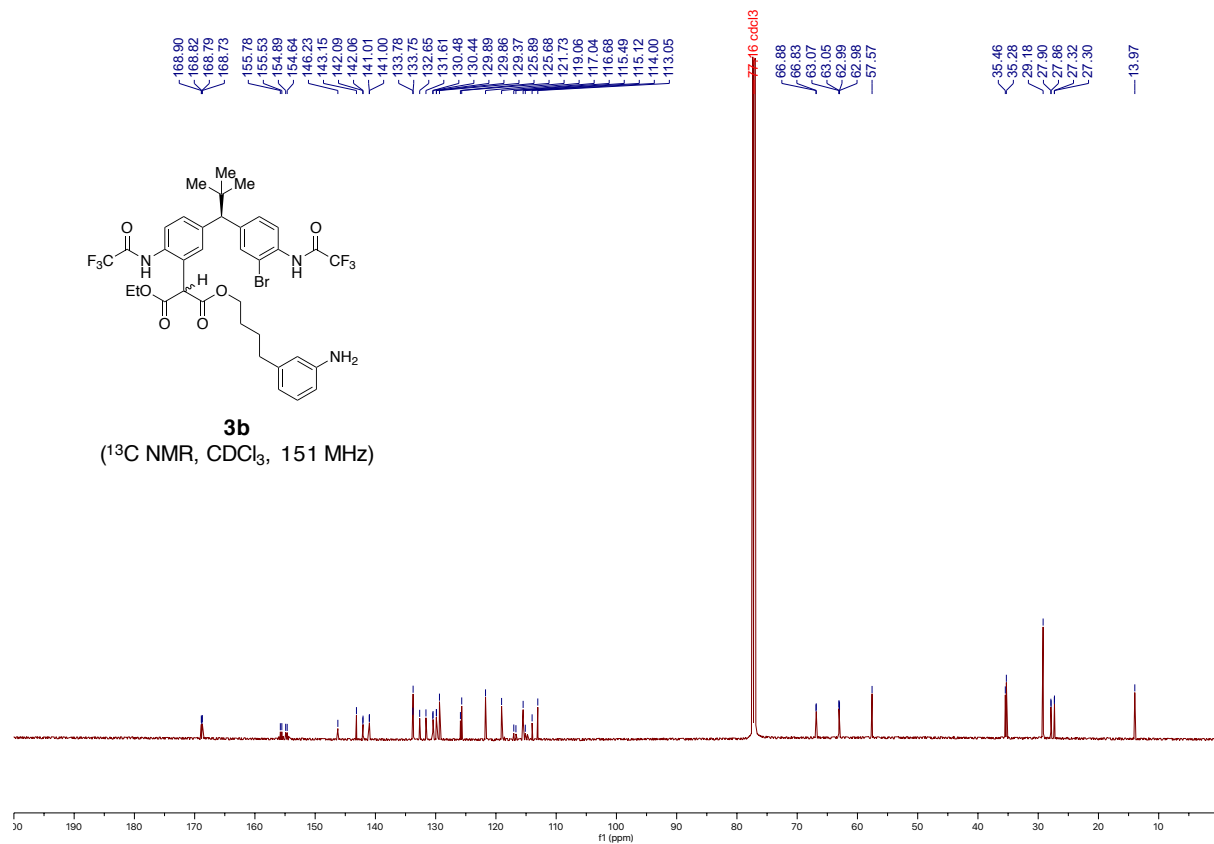

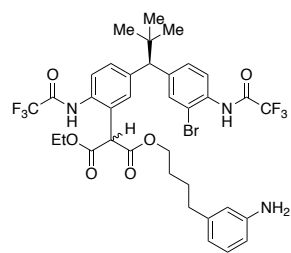

**3b**  
(<sup>19</sup>F NMR, CDCl<sub>3</sub>, 471 MHz)

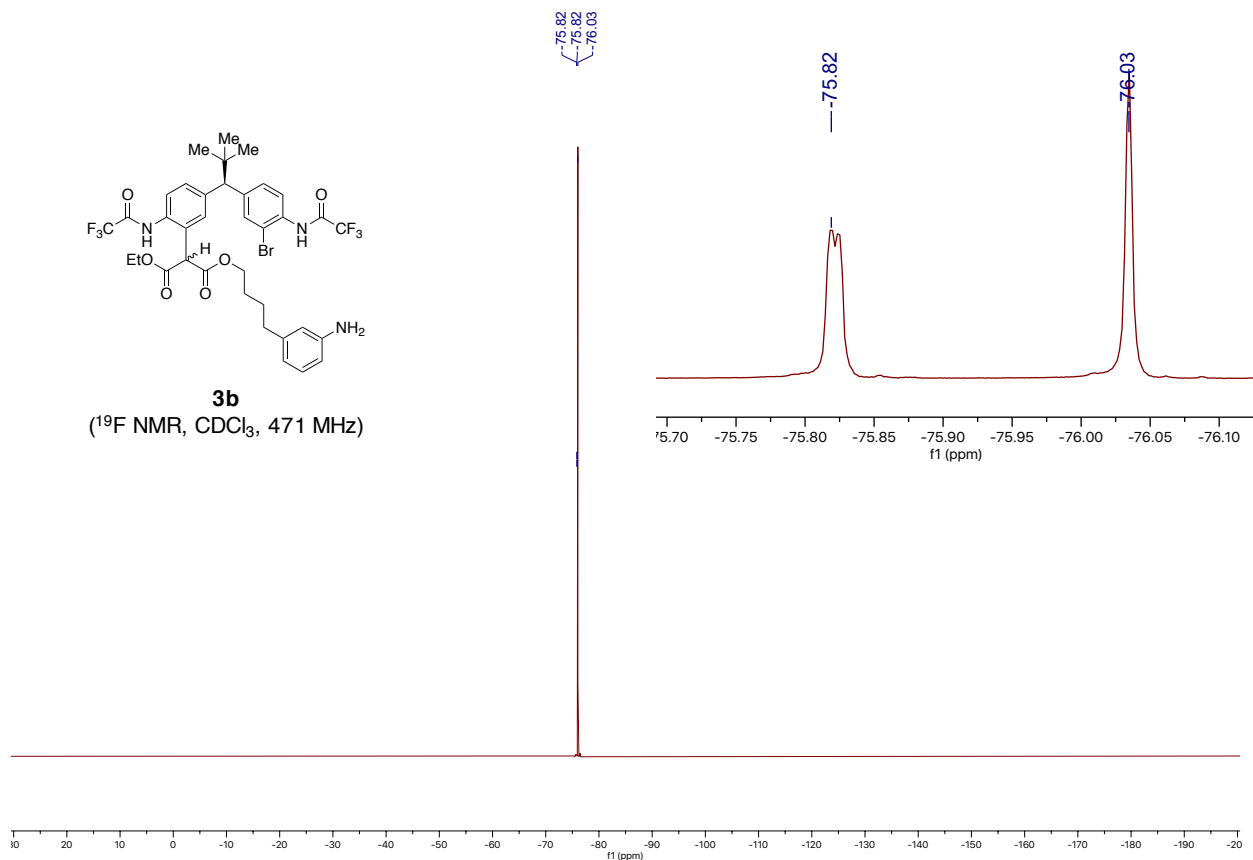

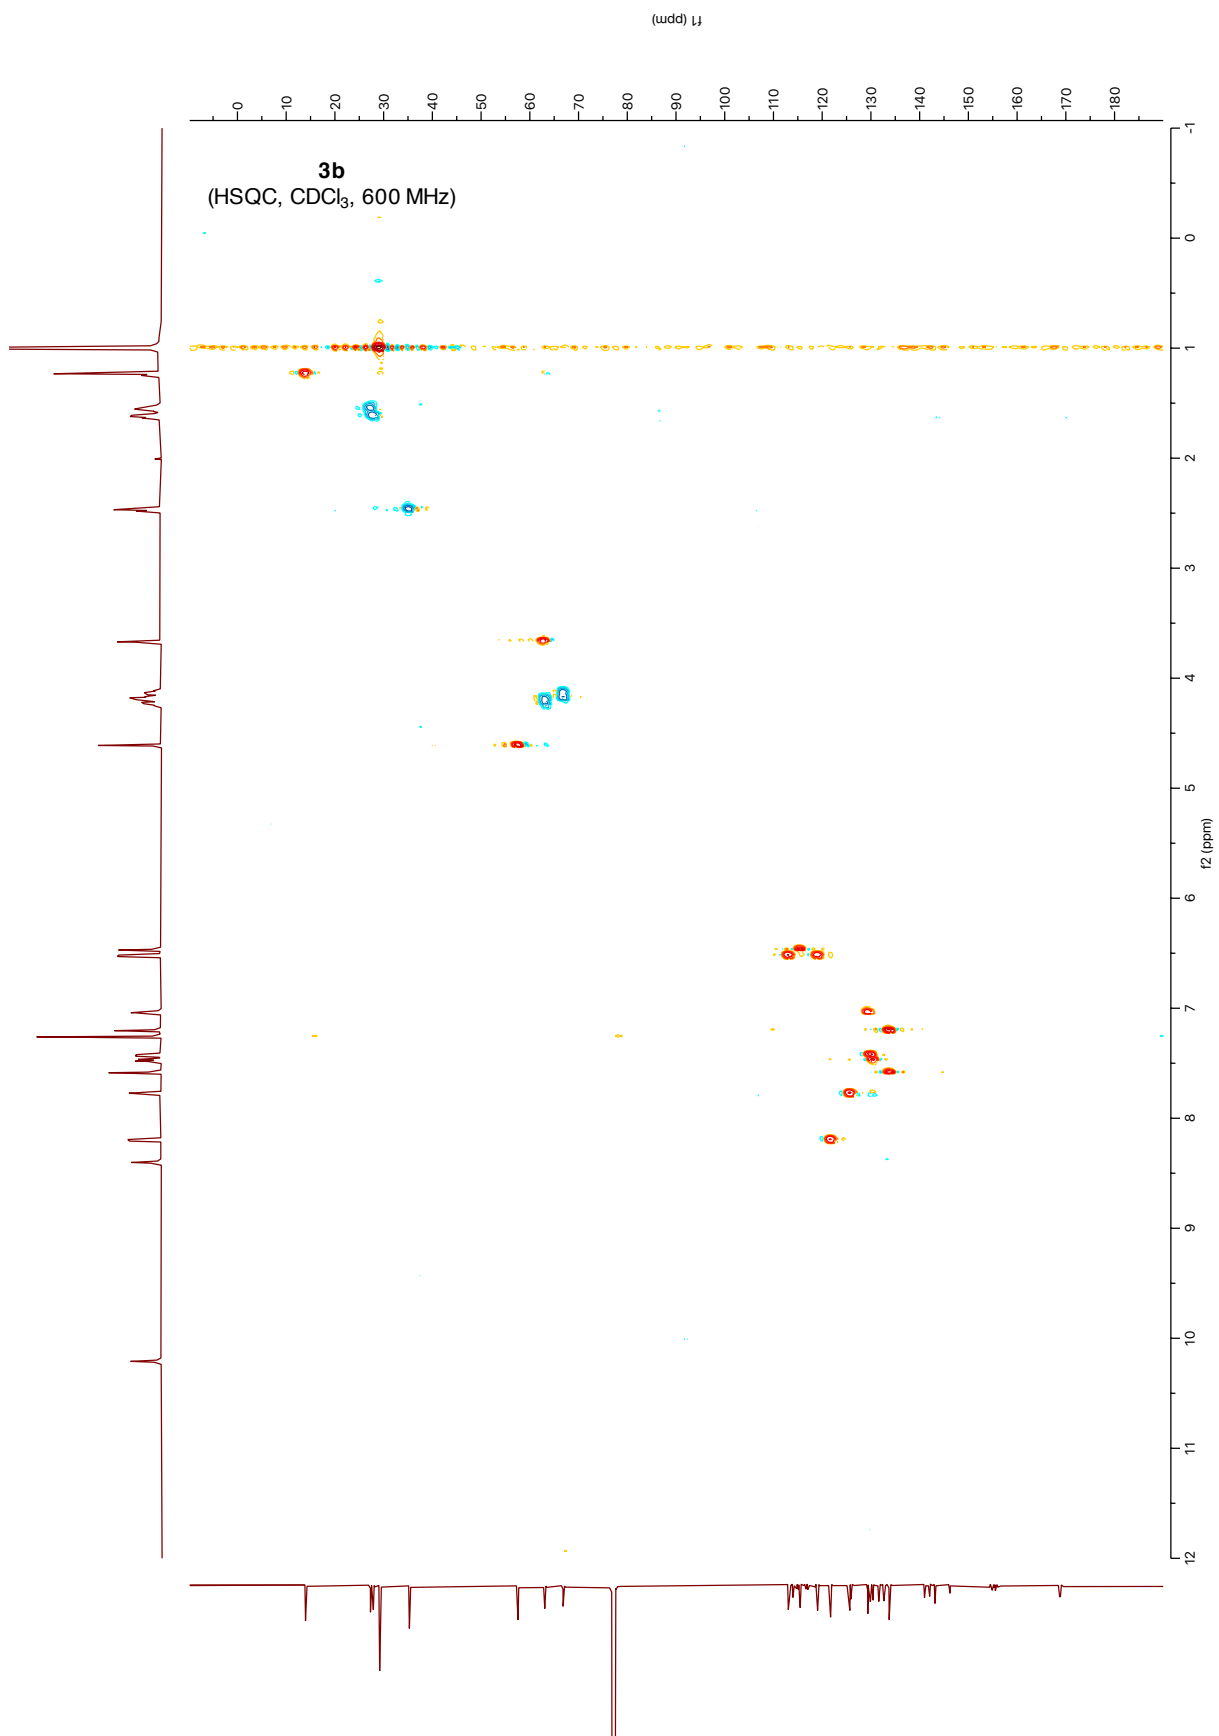

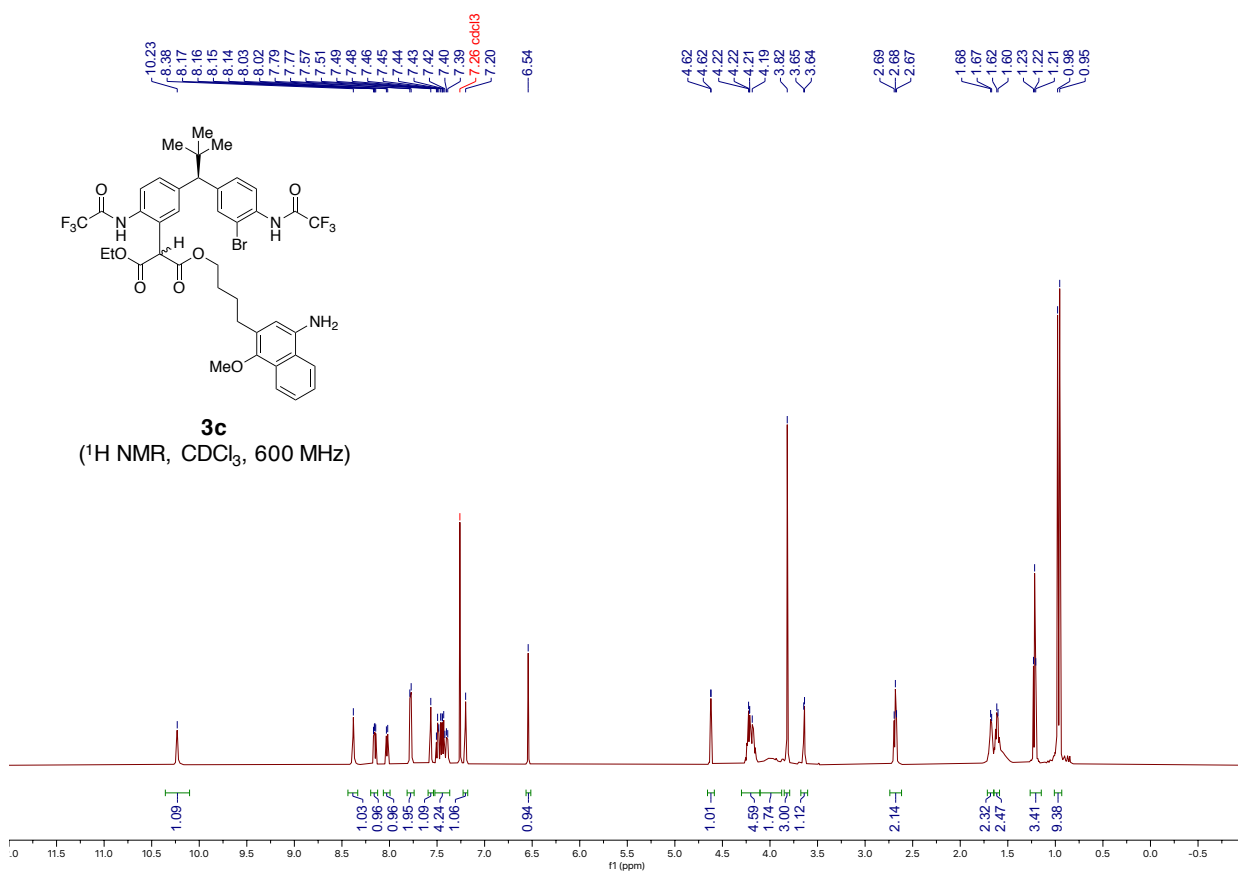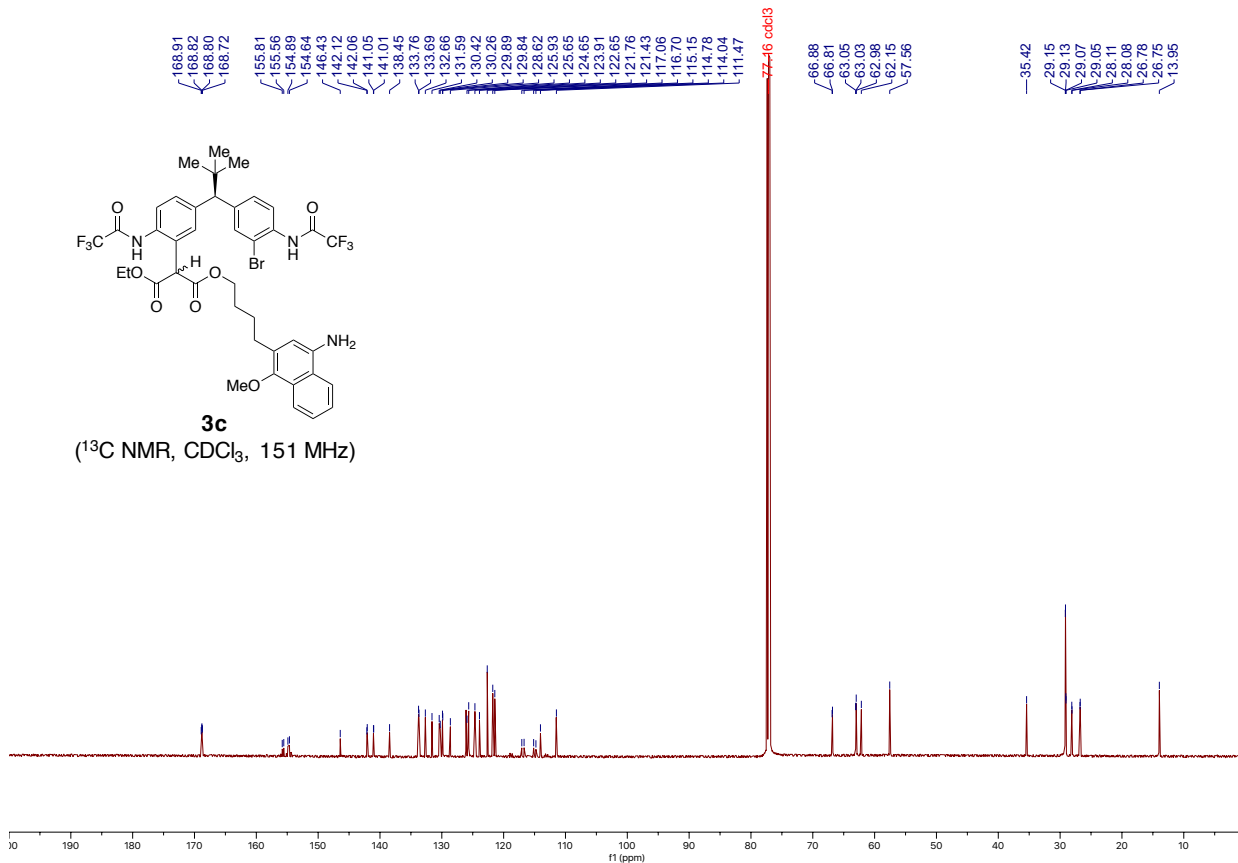



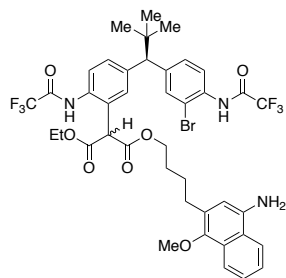

**3c**  
(<sup>19</sup>F NMR, CDCl<sub>3</sub>, 376 MHz)

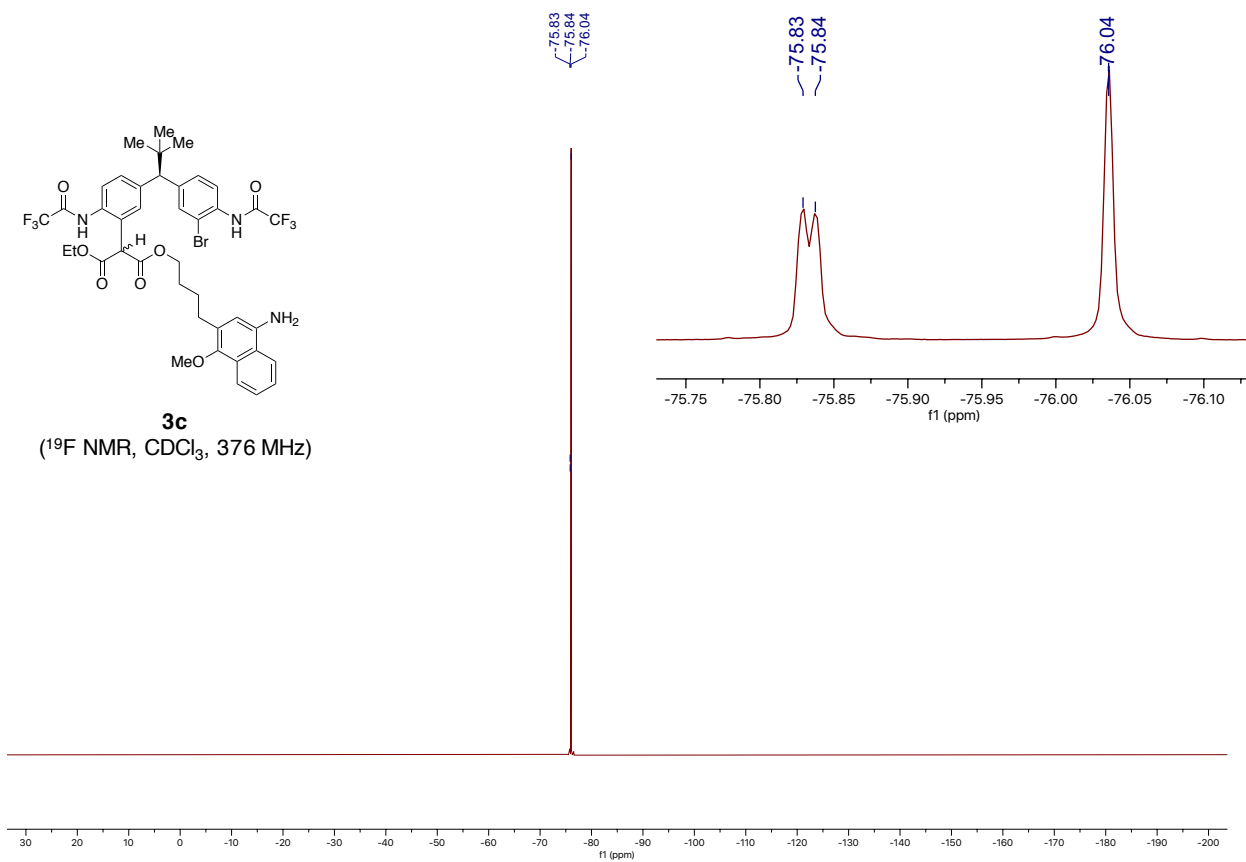

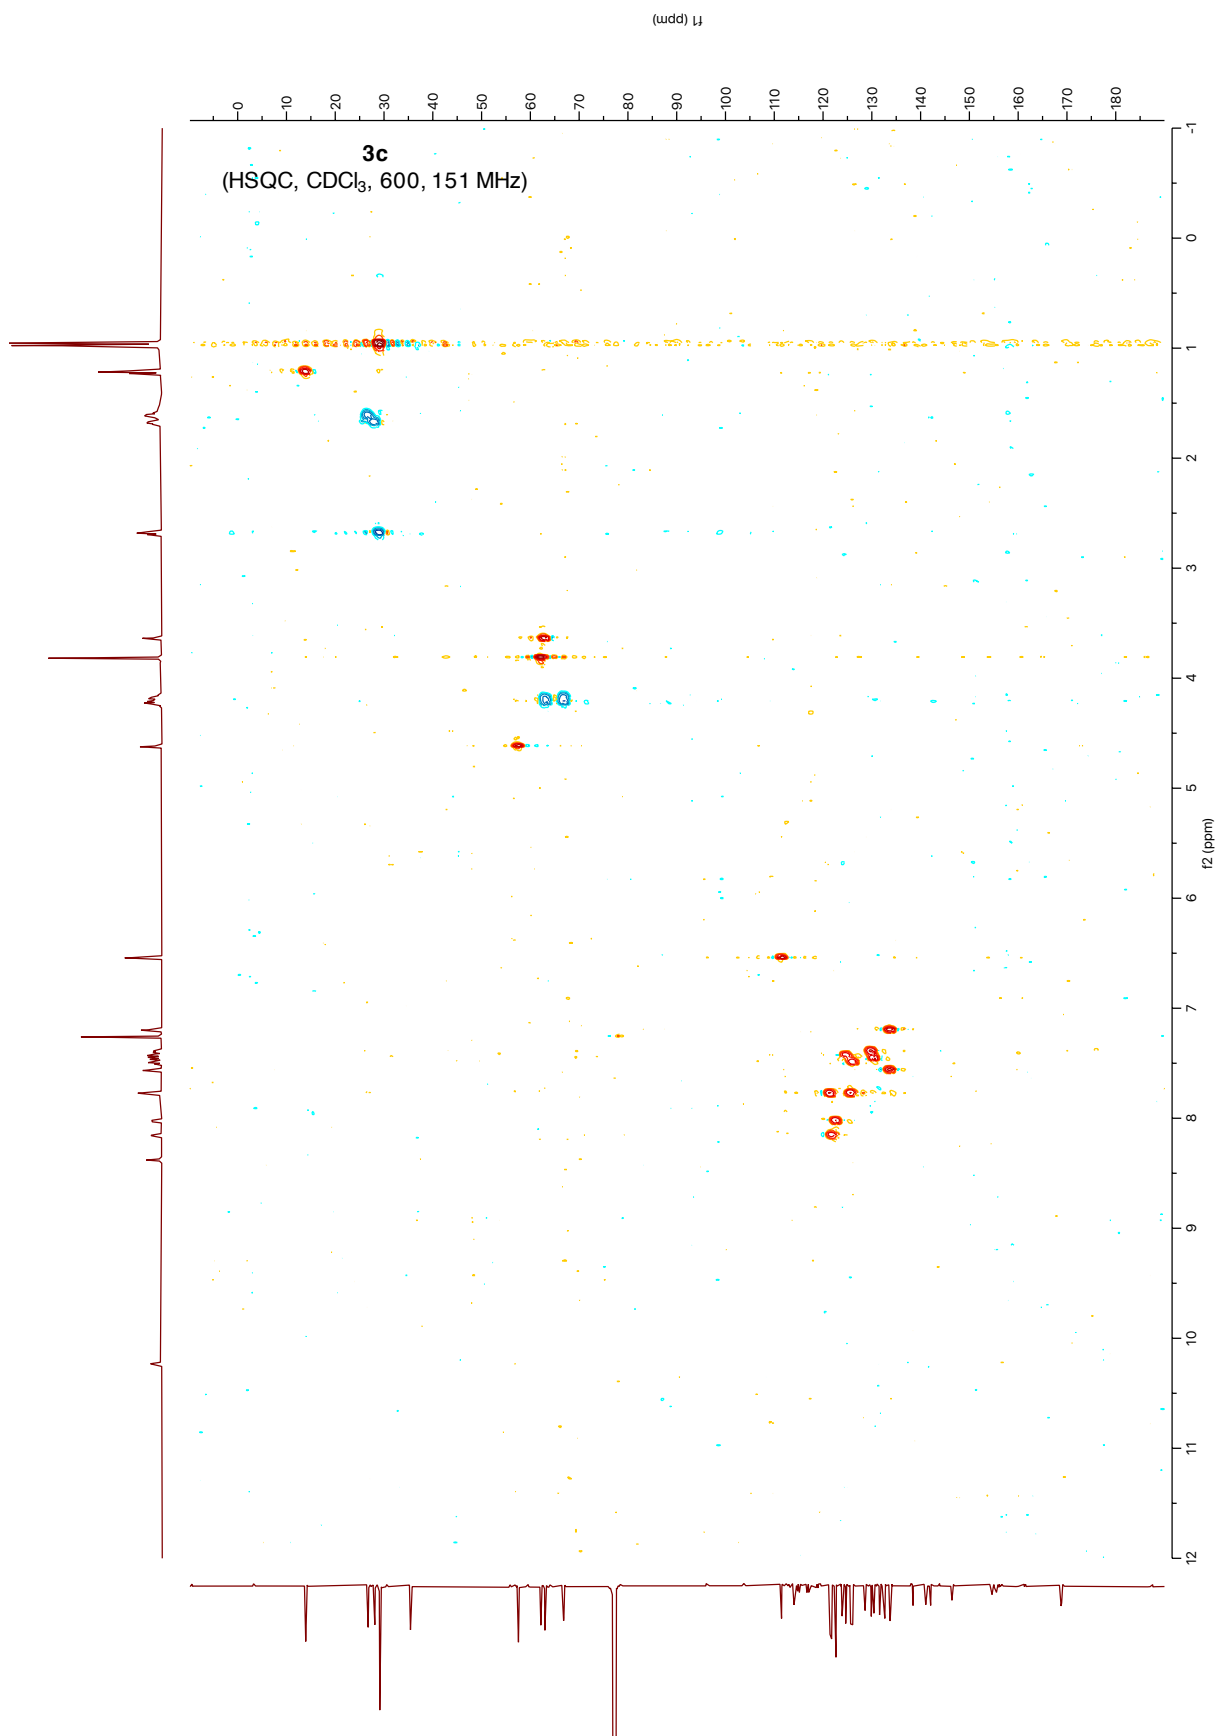

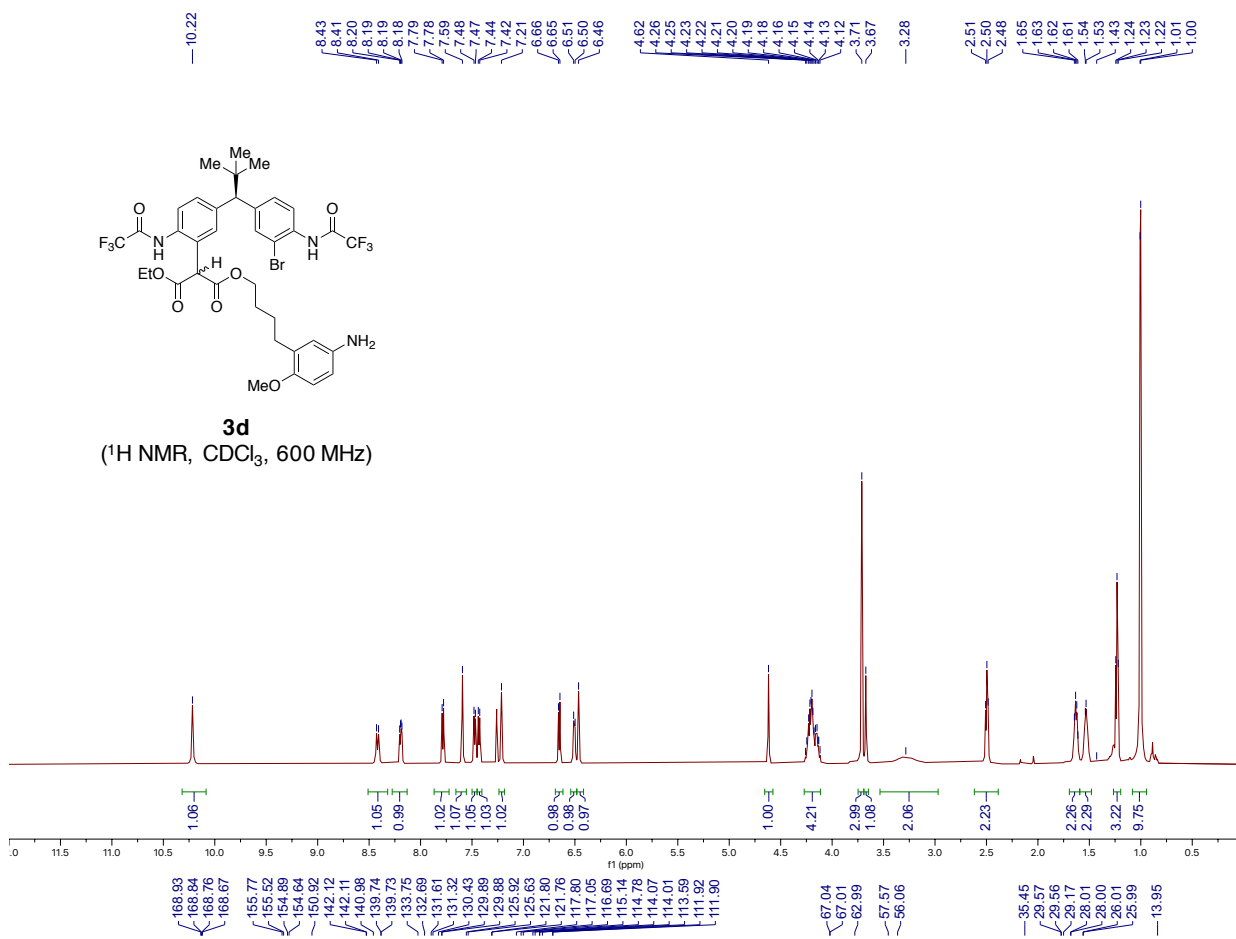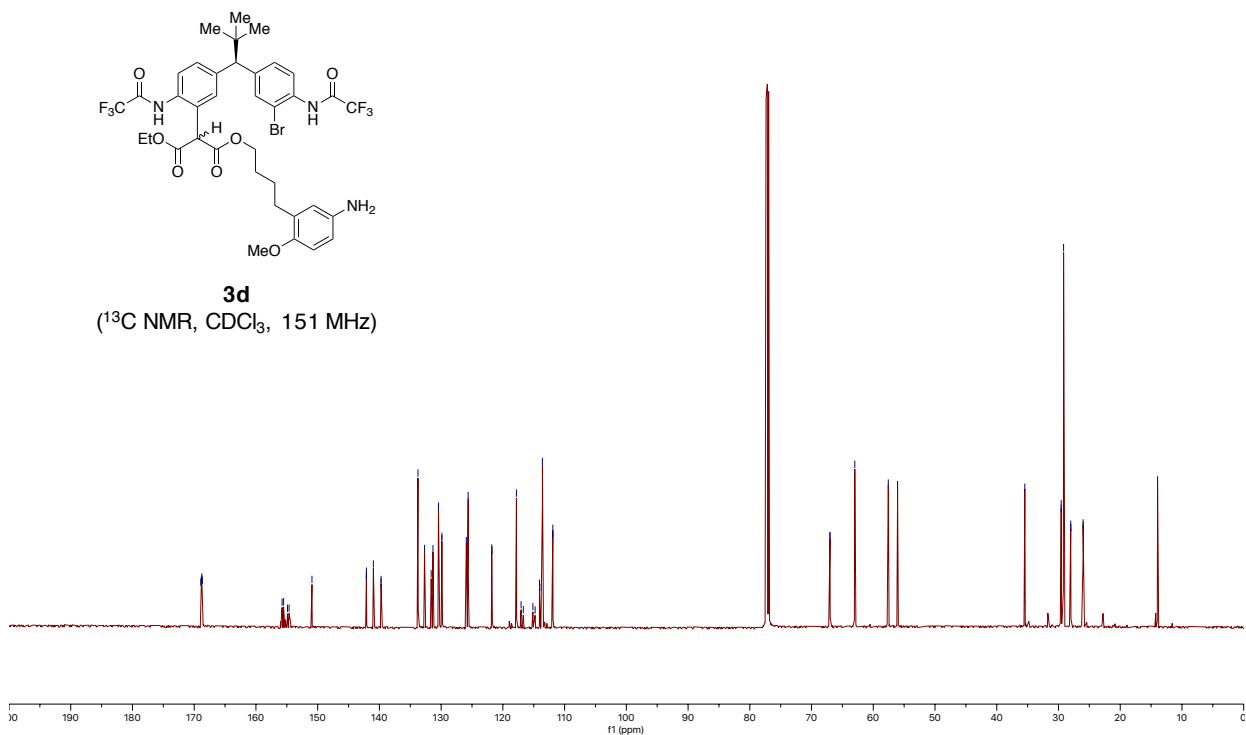

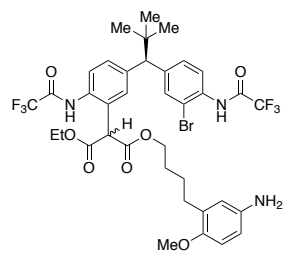

**3d**  
(<sup>19</sup>F NMR, CDCl<sub>3</sub>, 376 MHz)

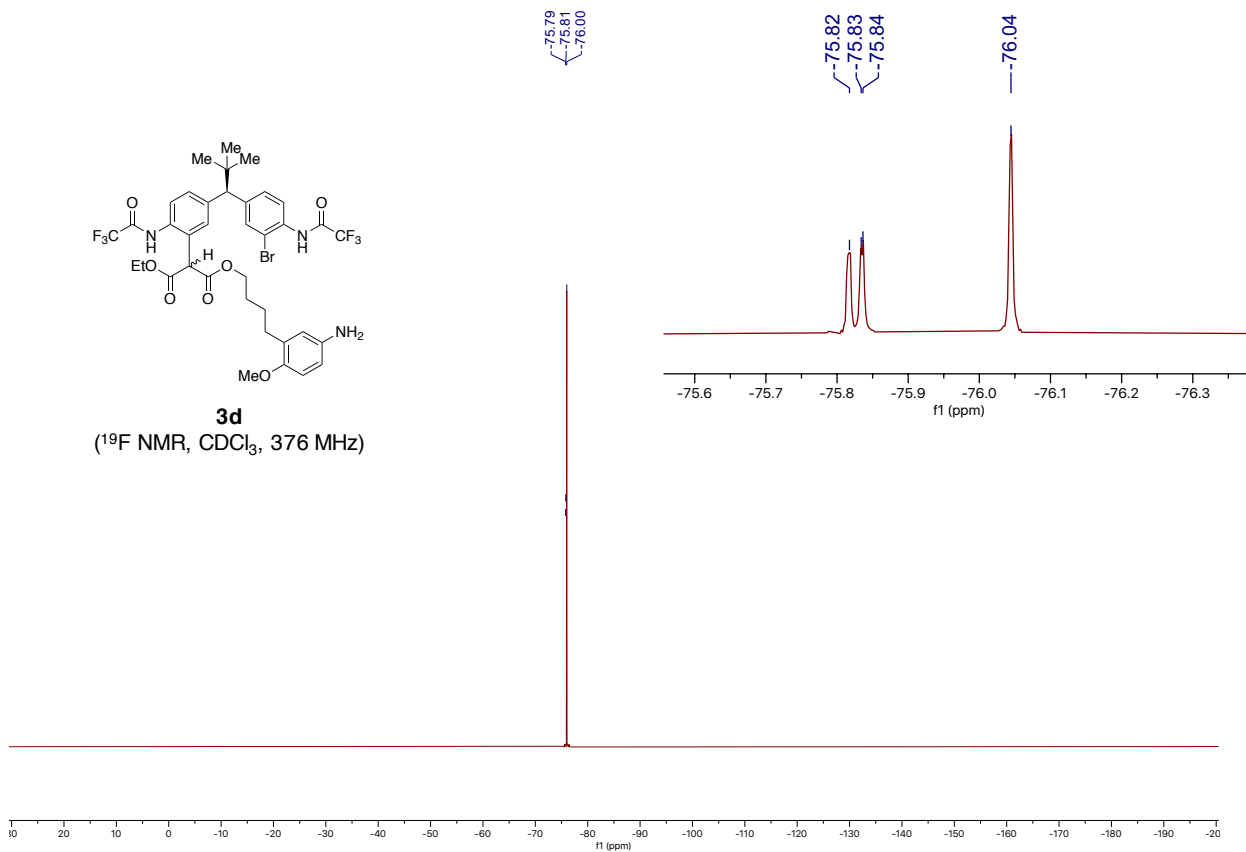

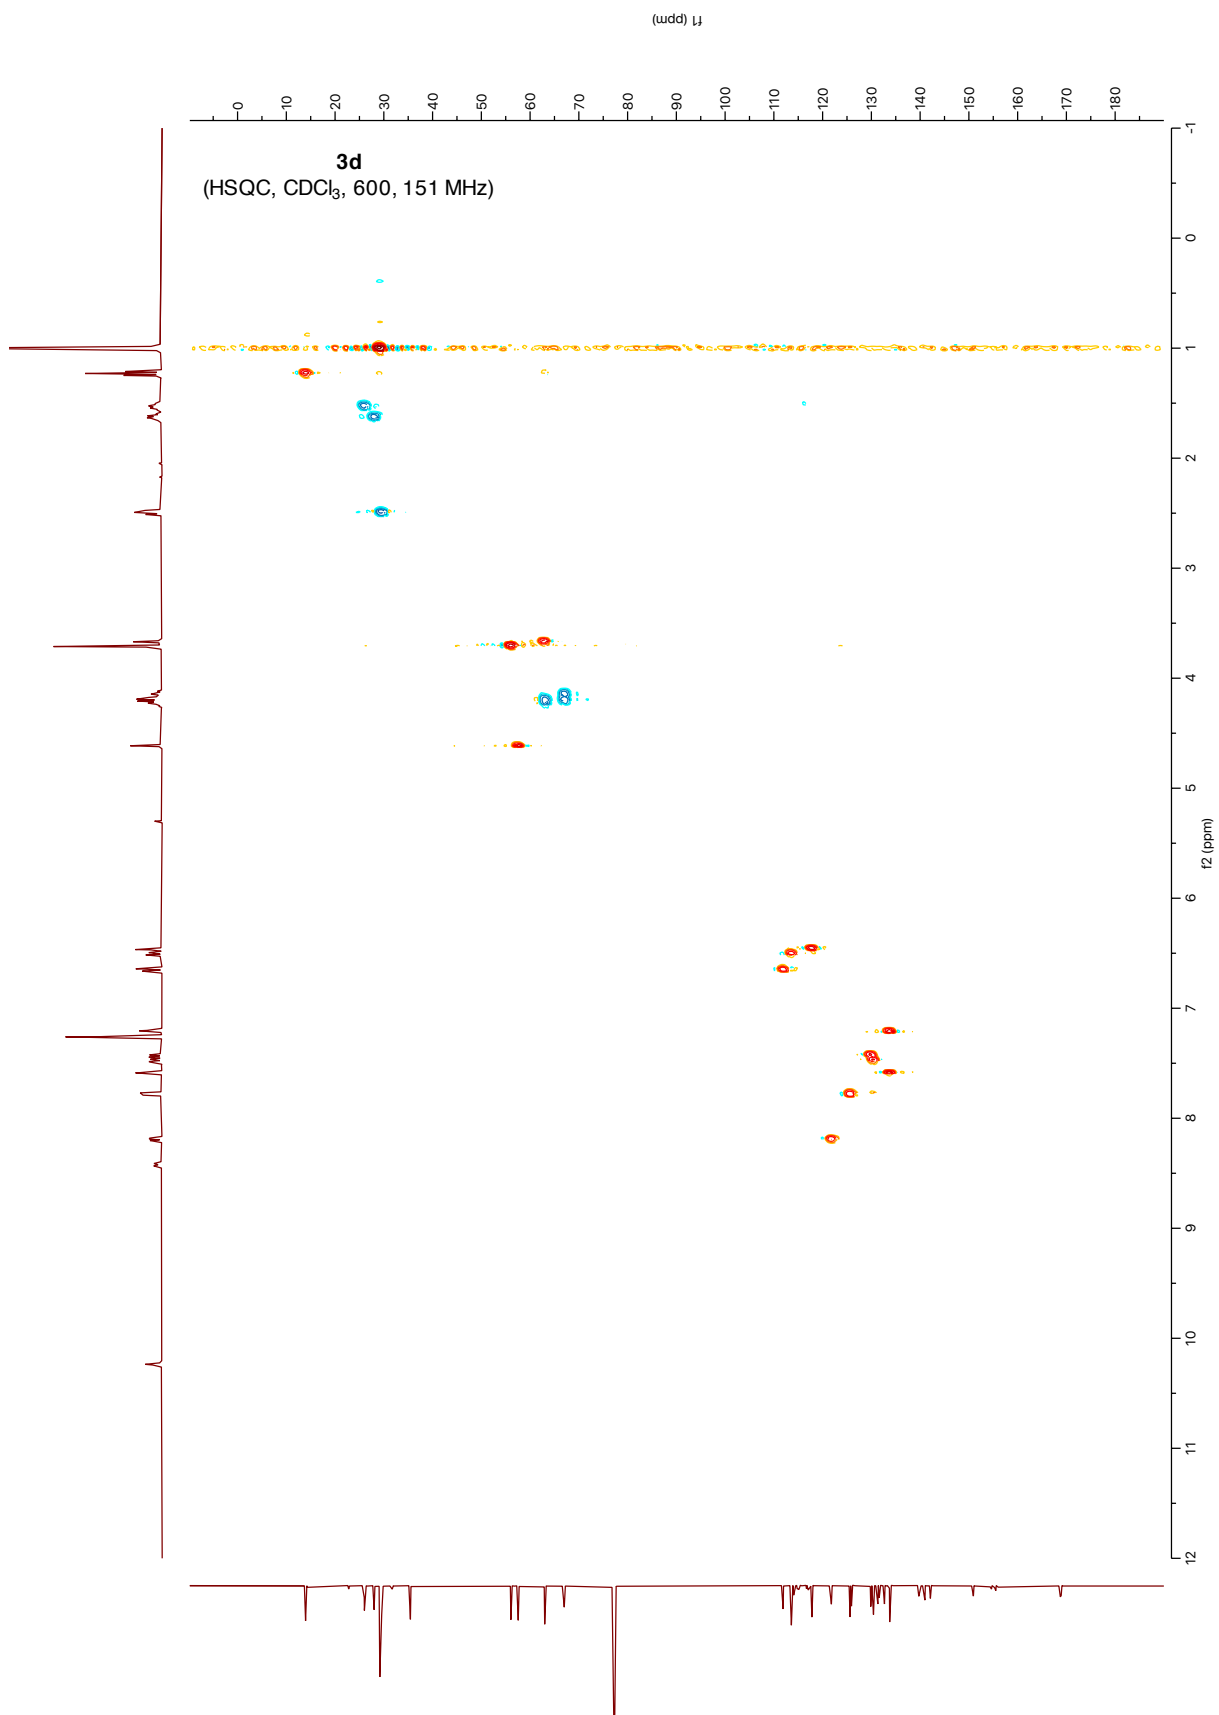

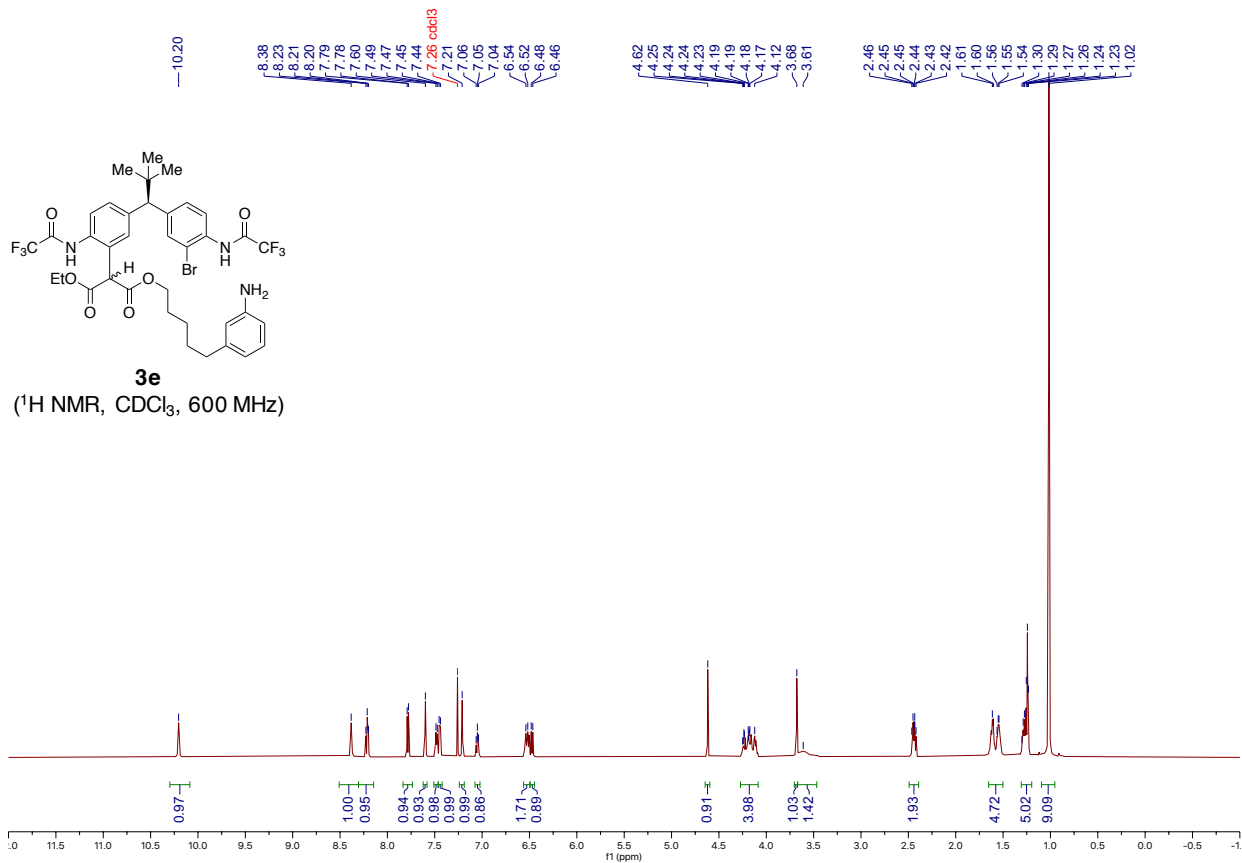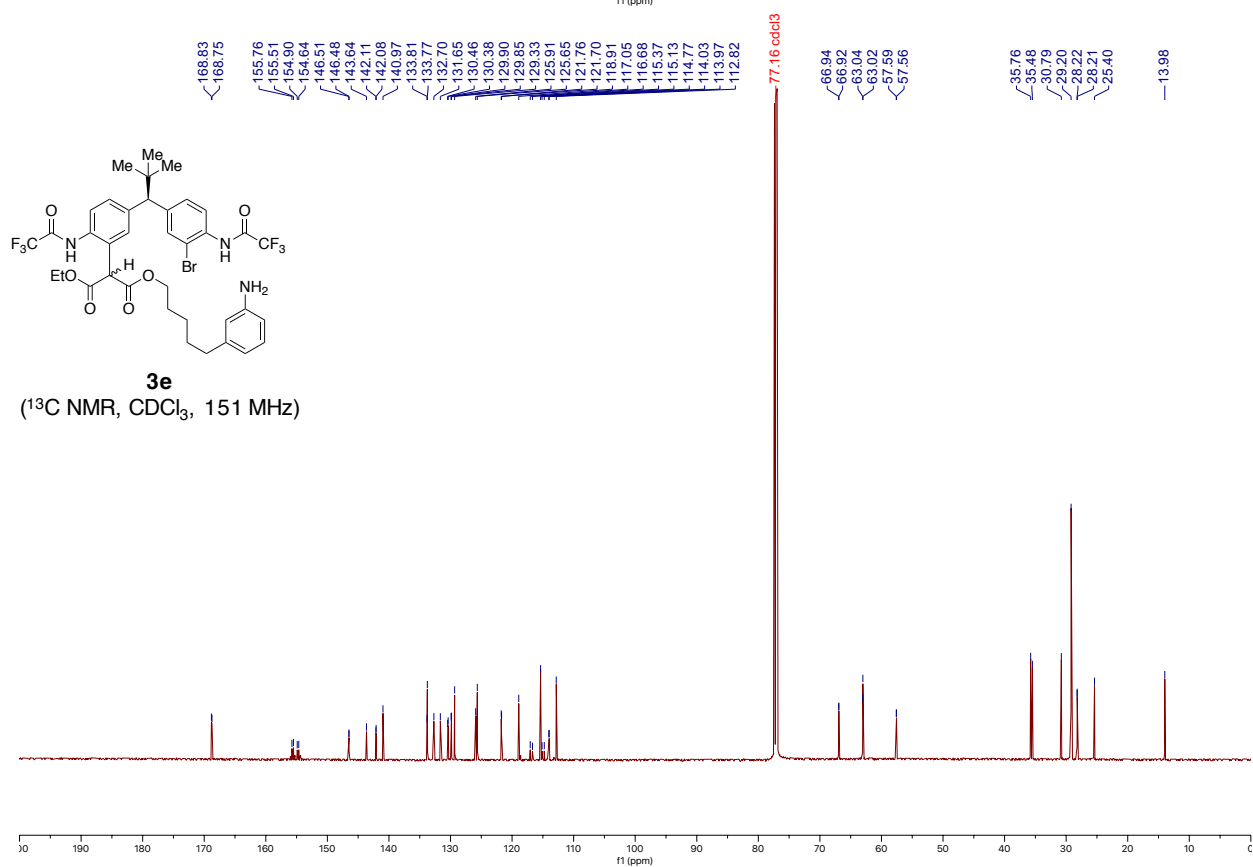

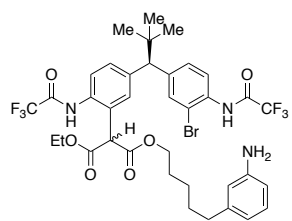

**3e**  
(<sup>19</sup>F NMR, CDCl<sub>3</sub>, 376 MHz)

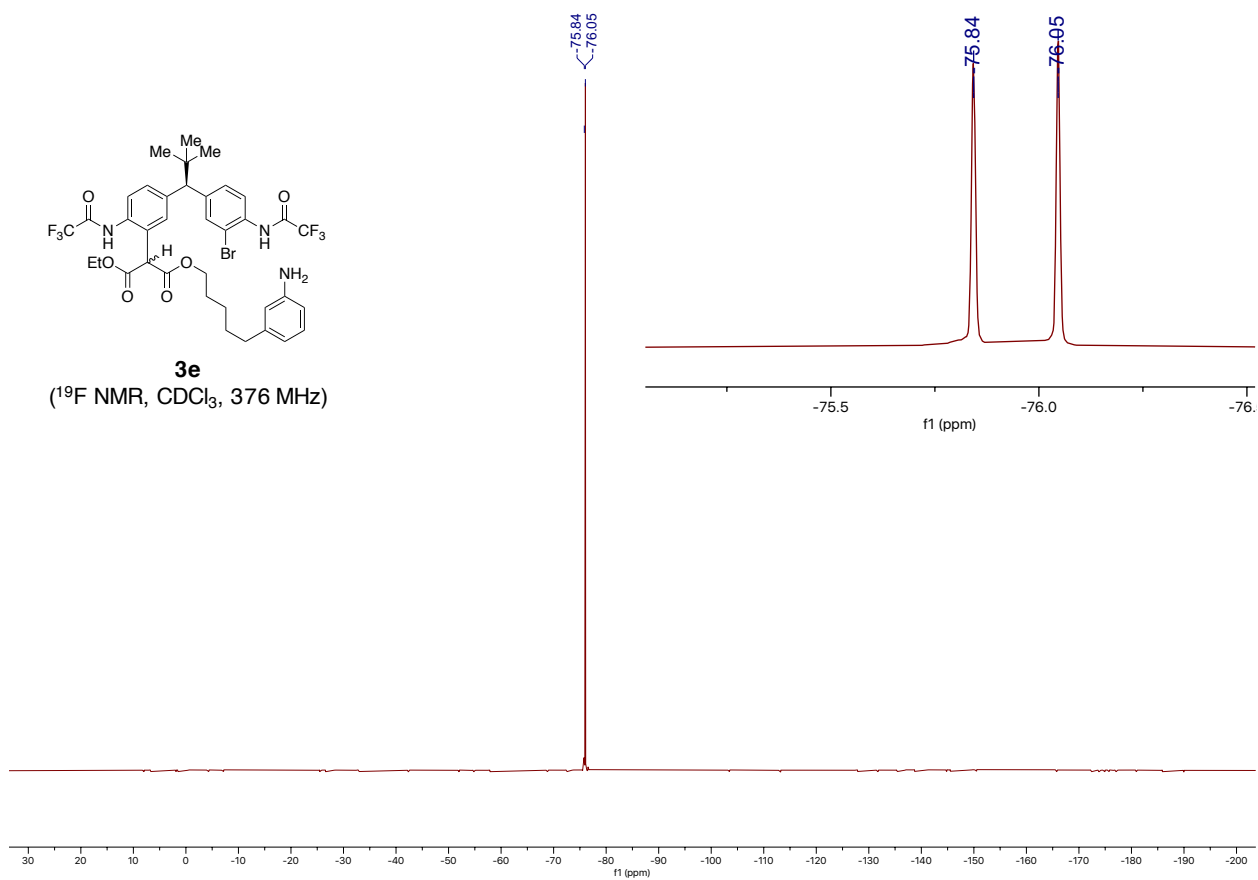

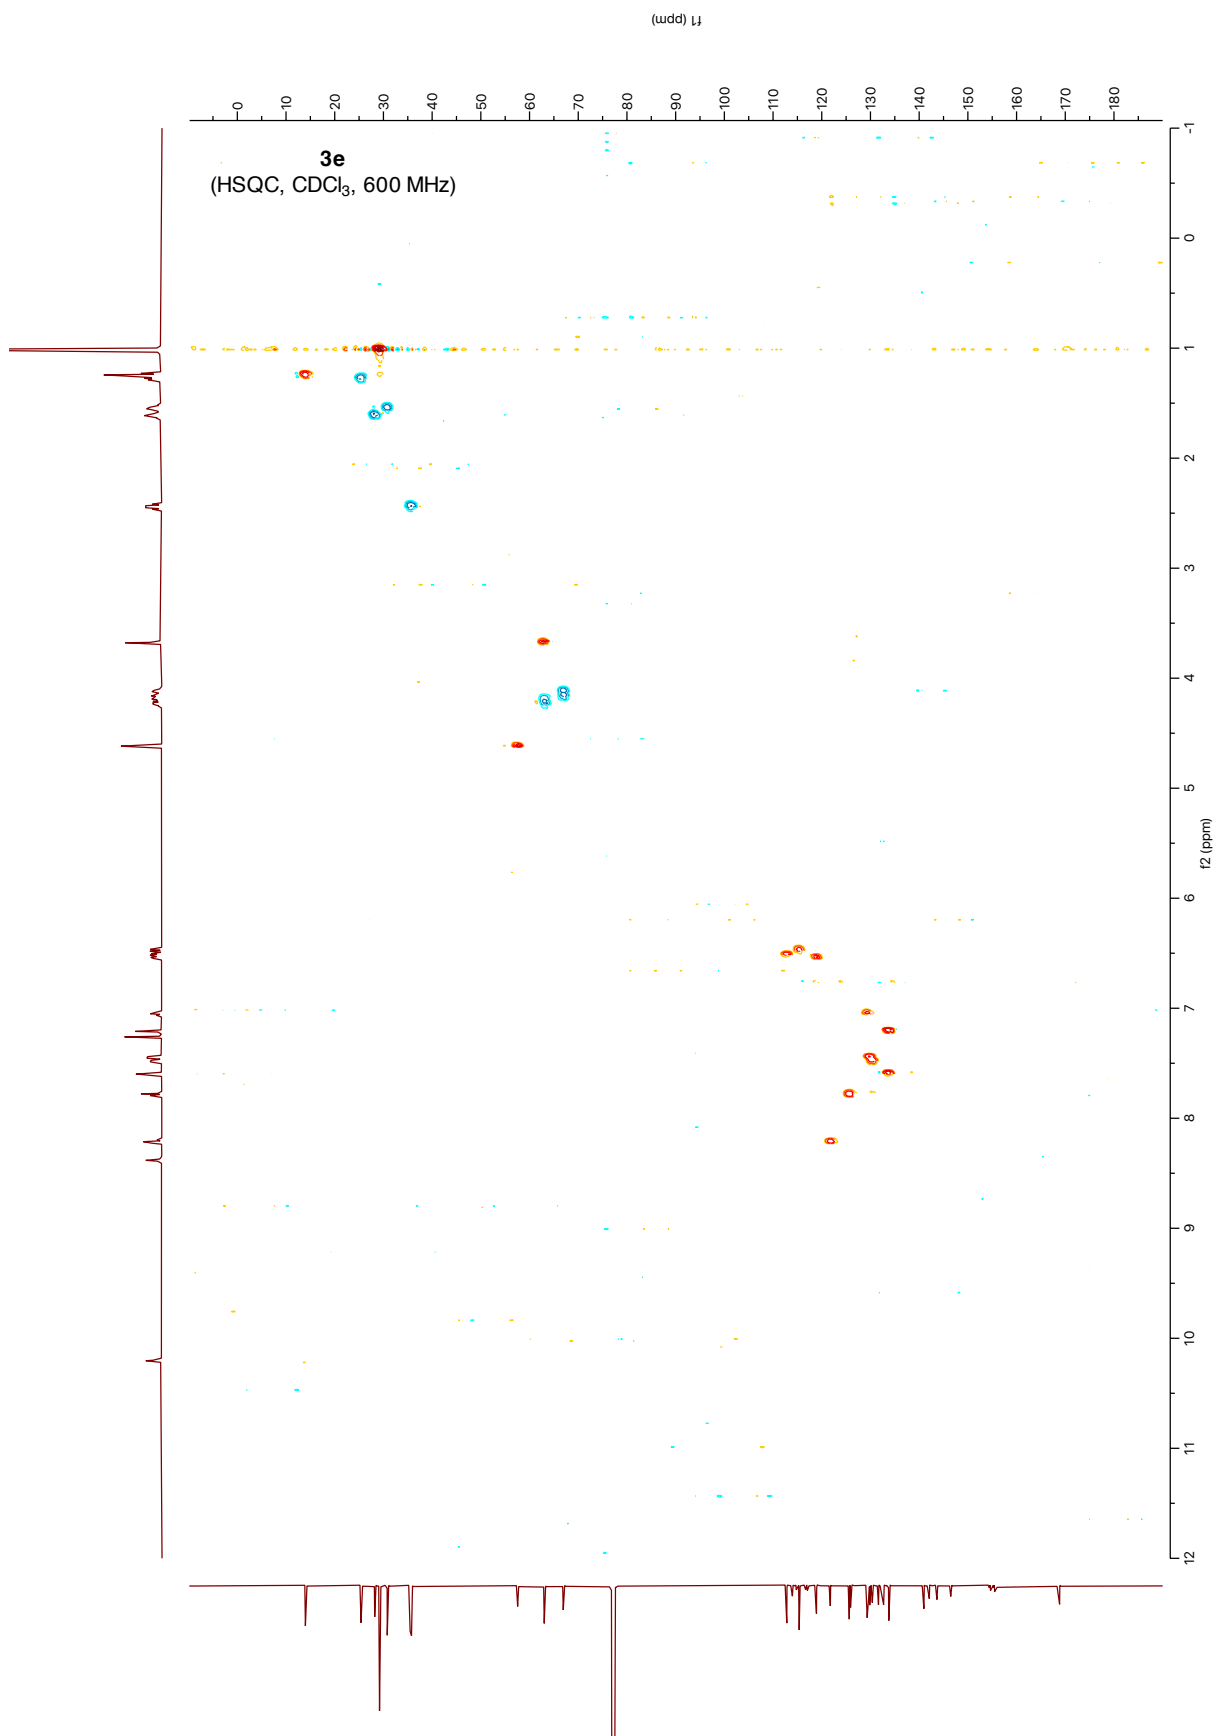



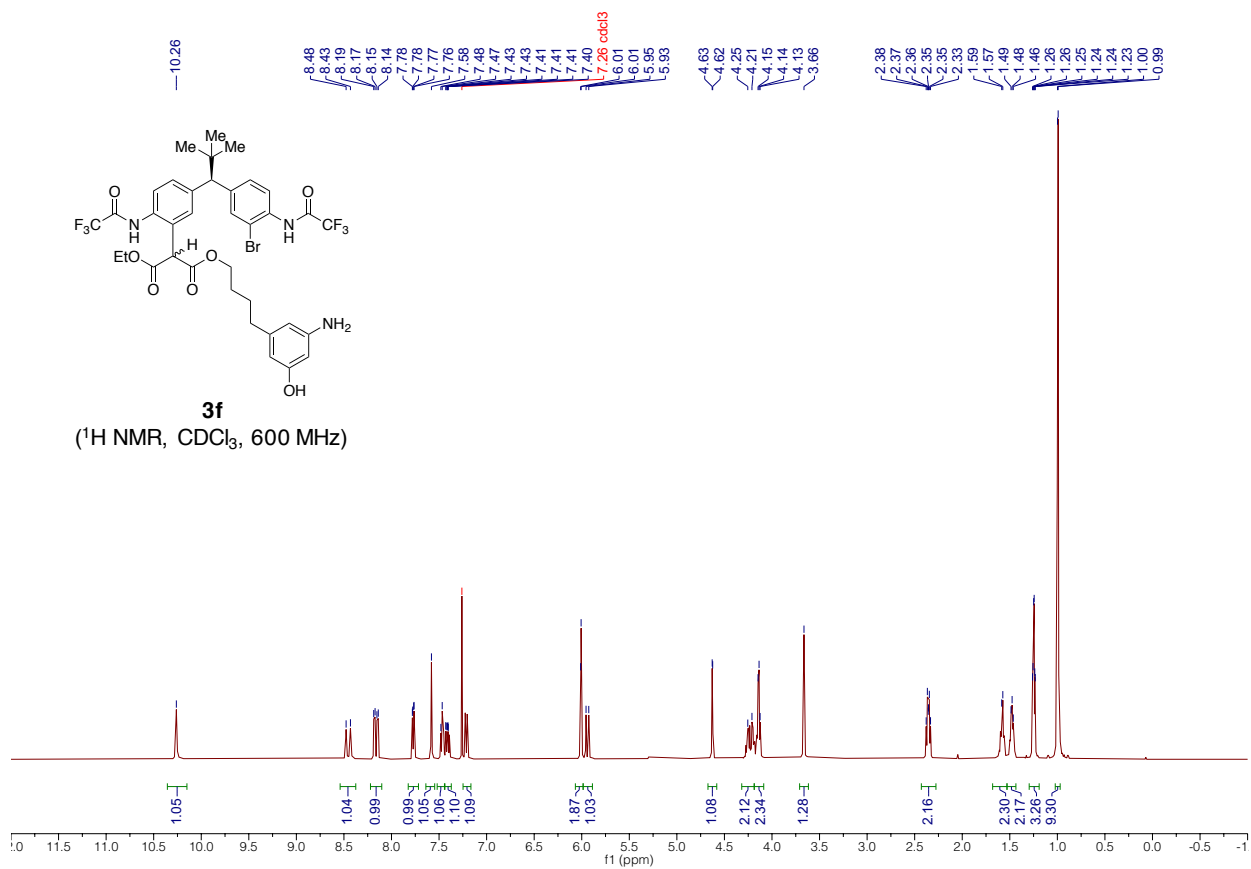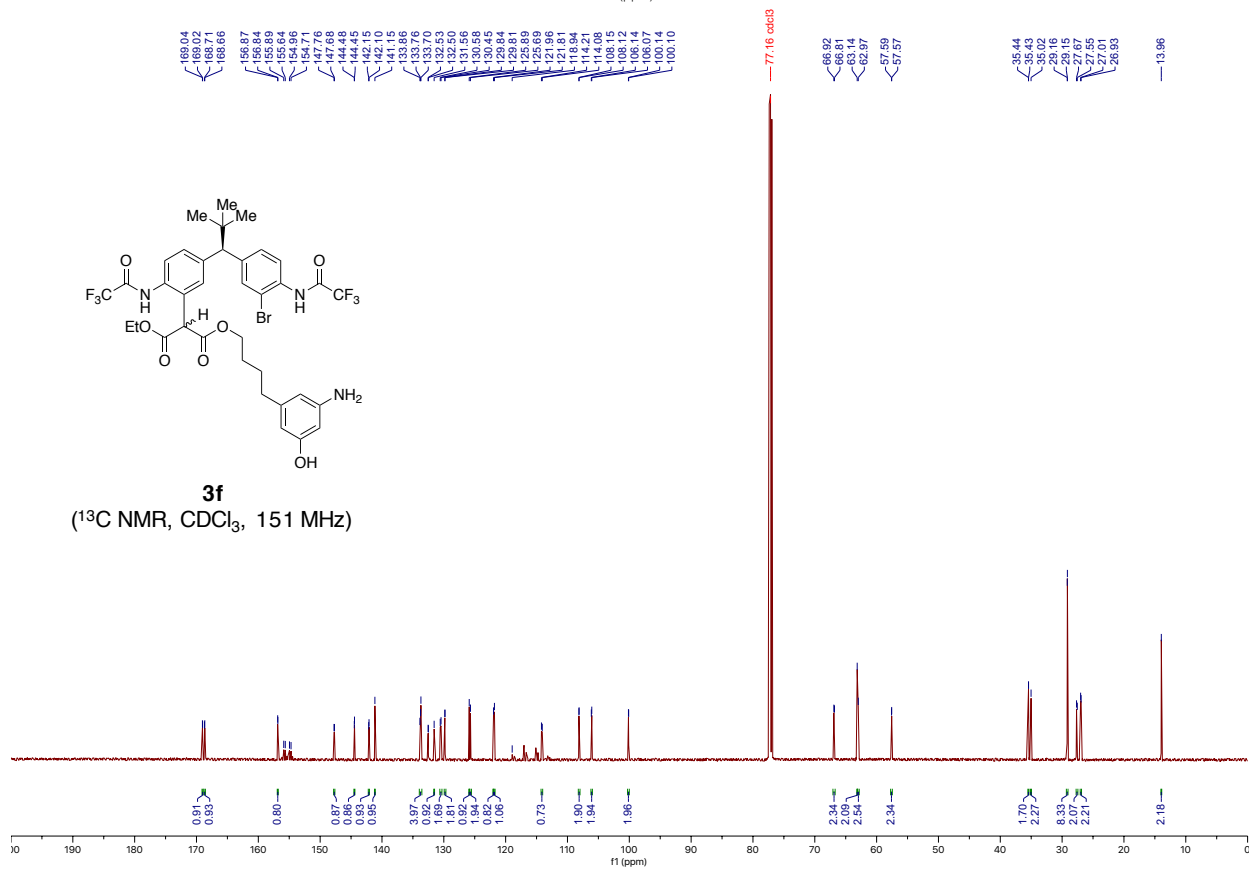

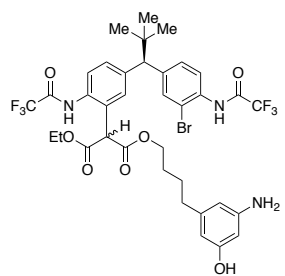

**3f**  
(<sup>19</sup>F NMR, CDCl<sub>3</sub>, 500 MHz)

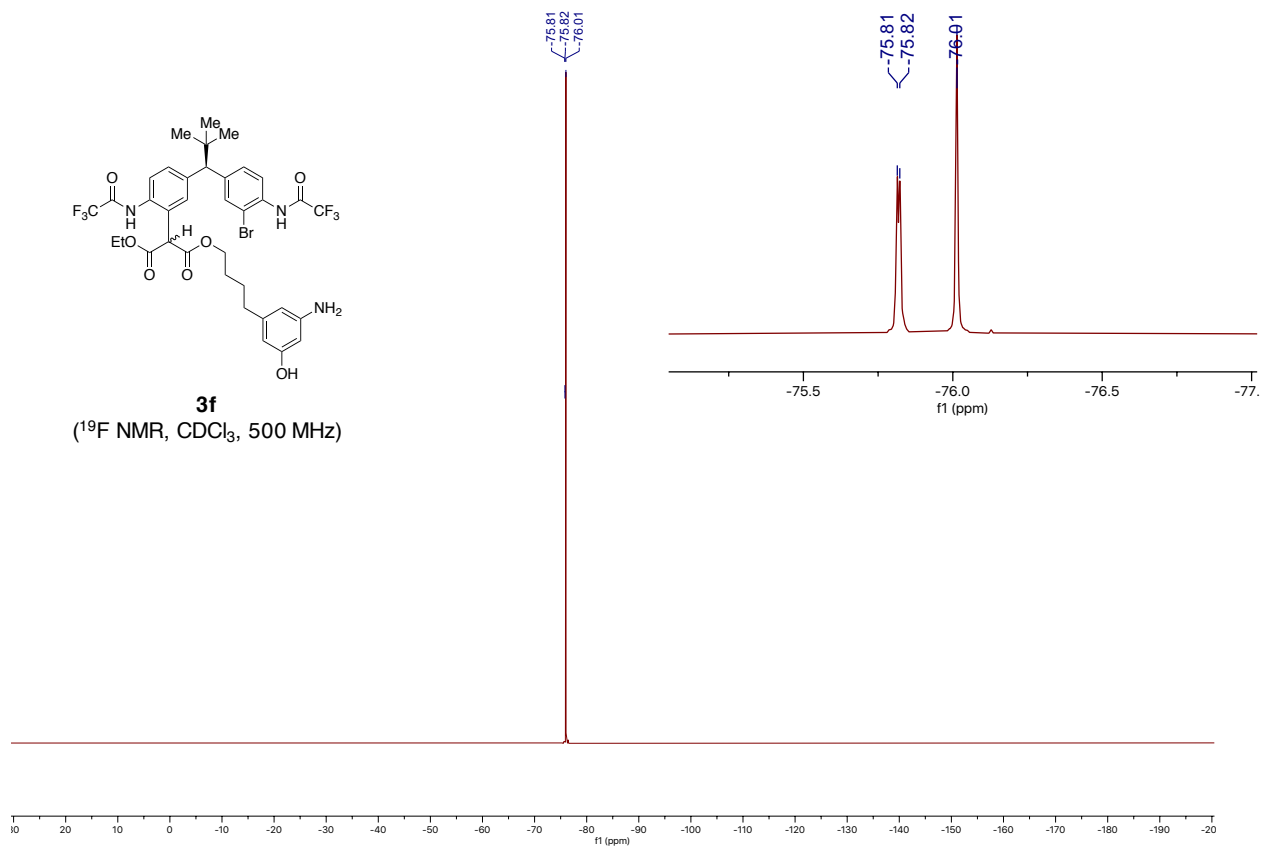

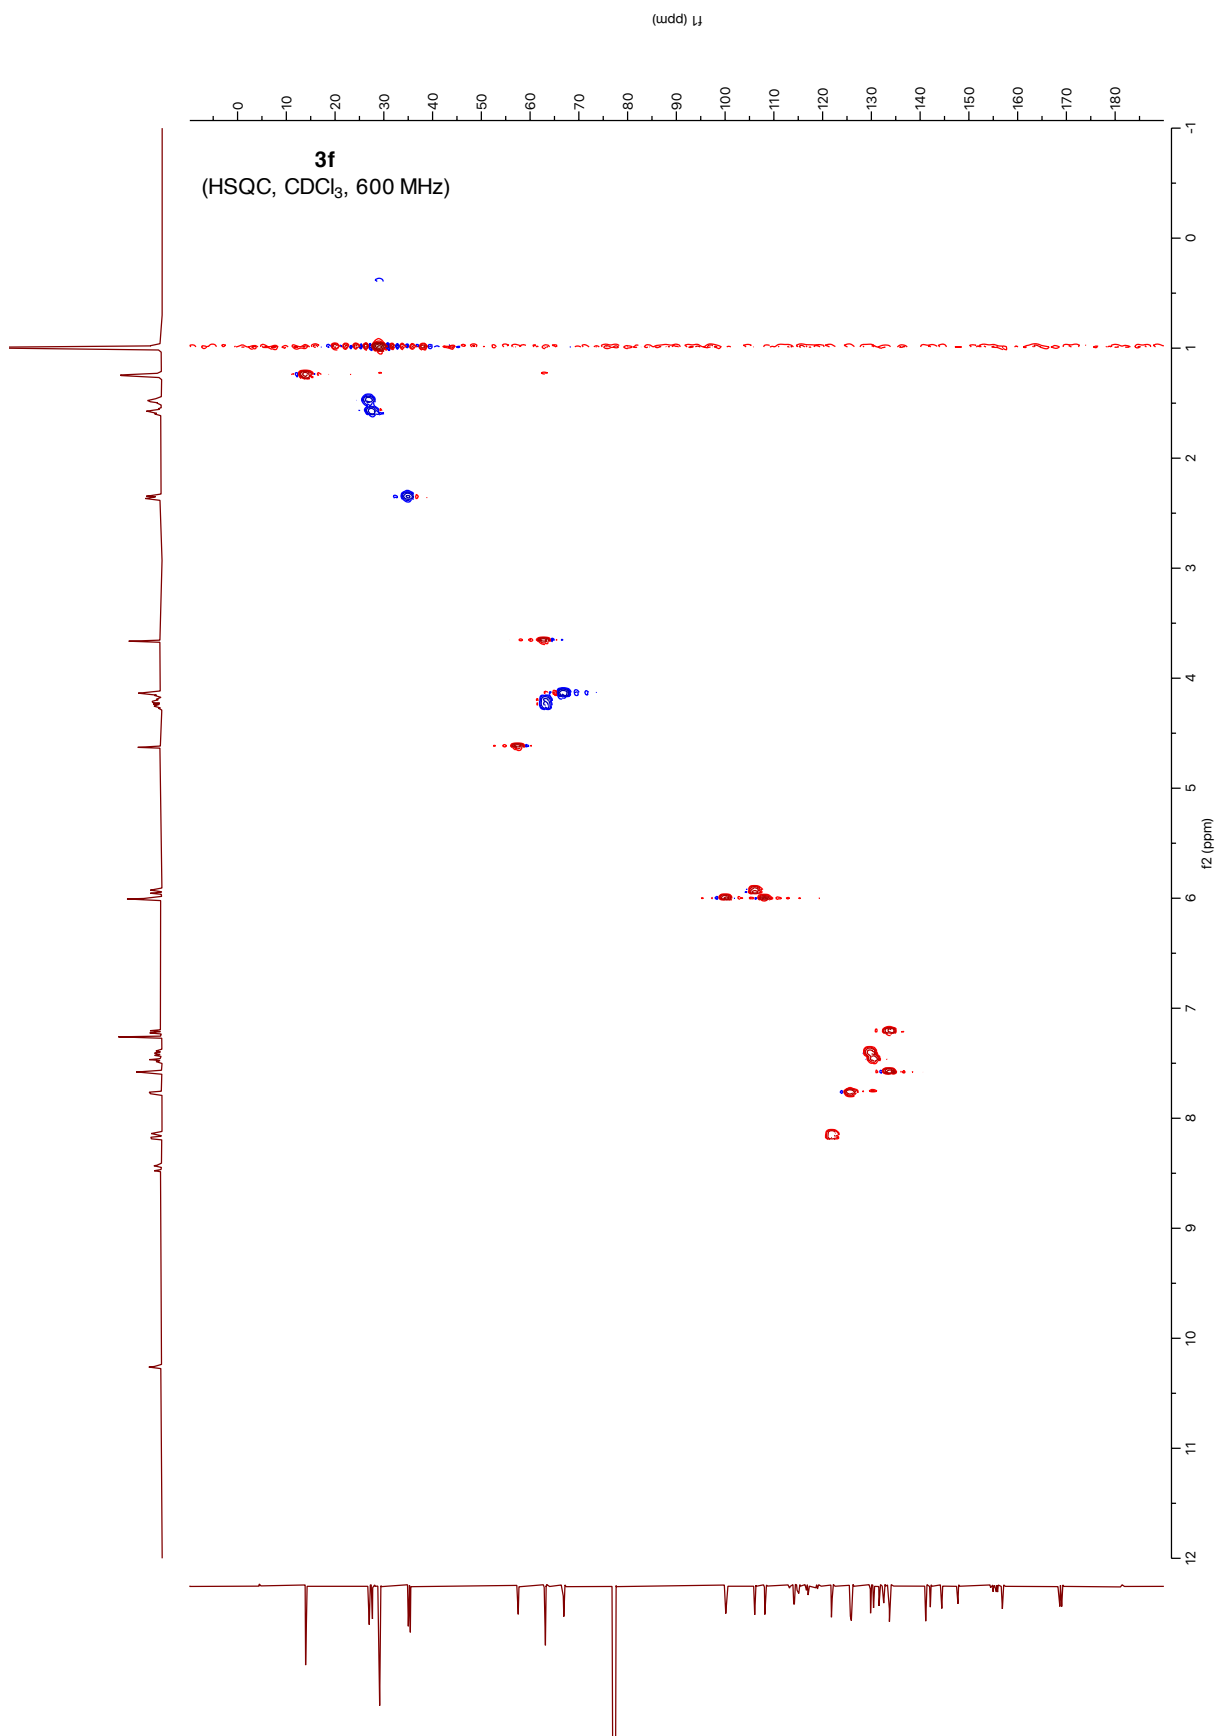

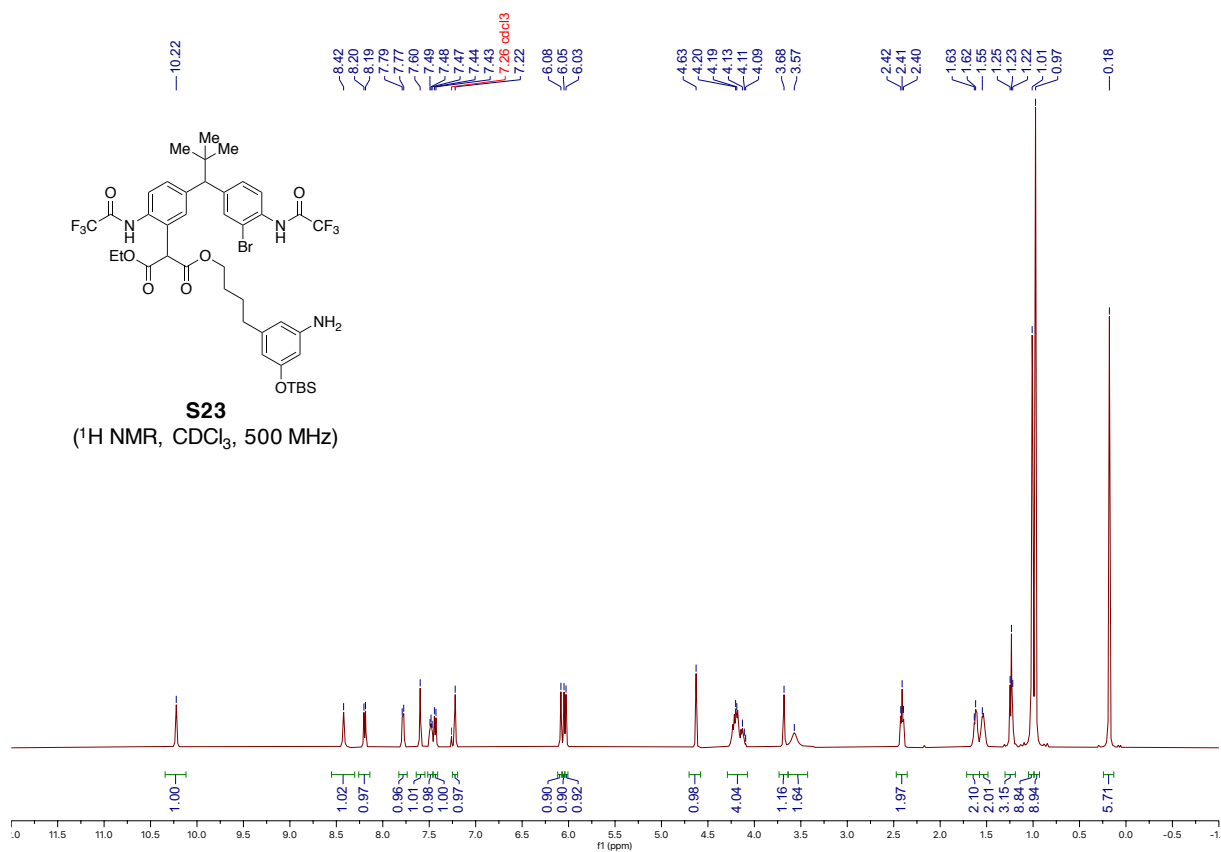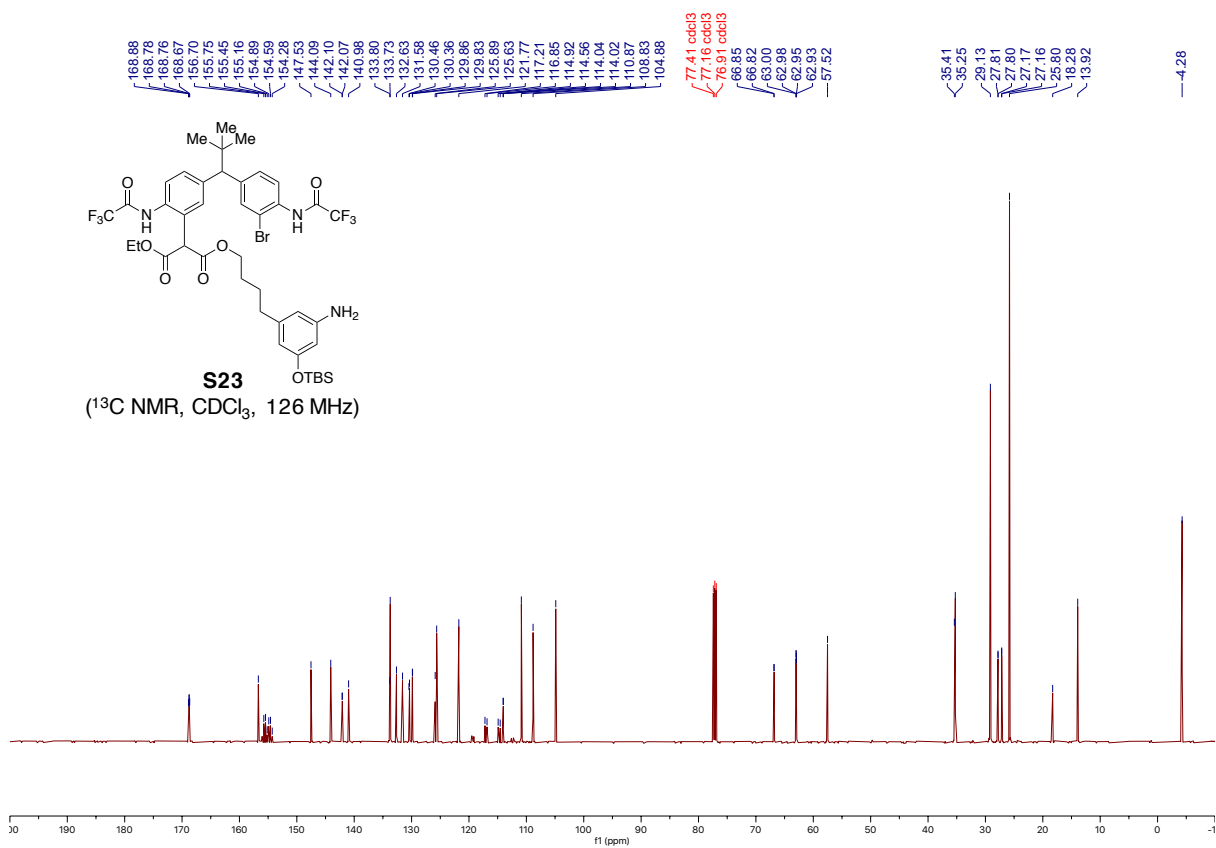

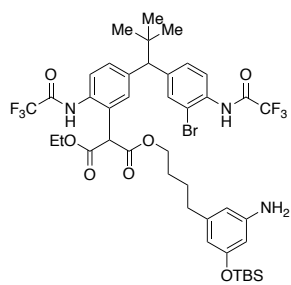

**S23**  
(<sup>19</sup>F NMR, CDCl<sub>3</sub>, 471 MHz)

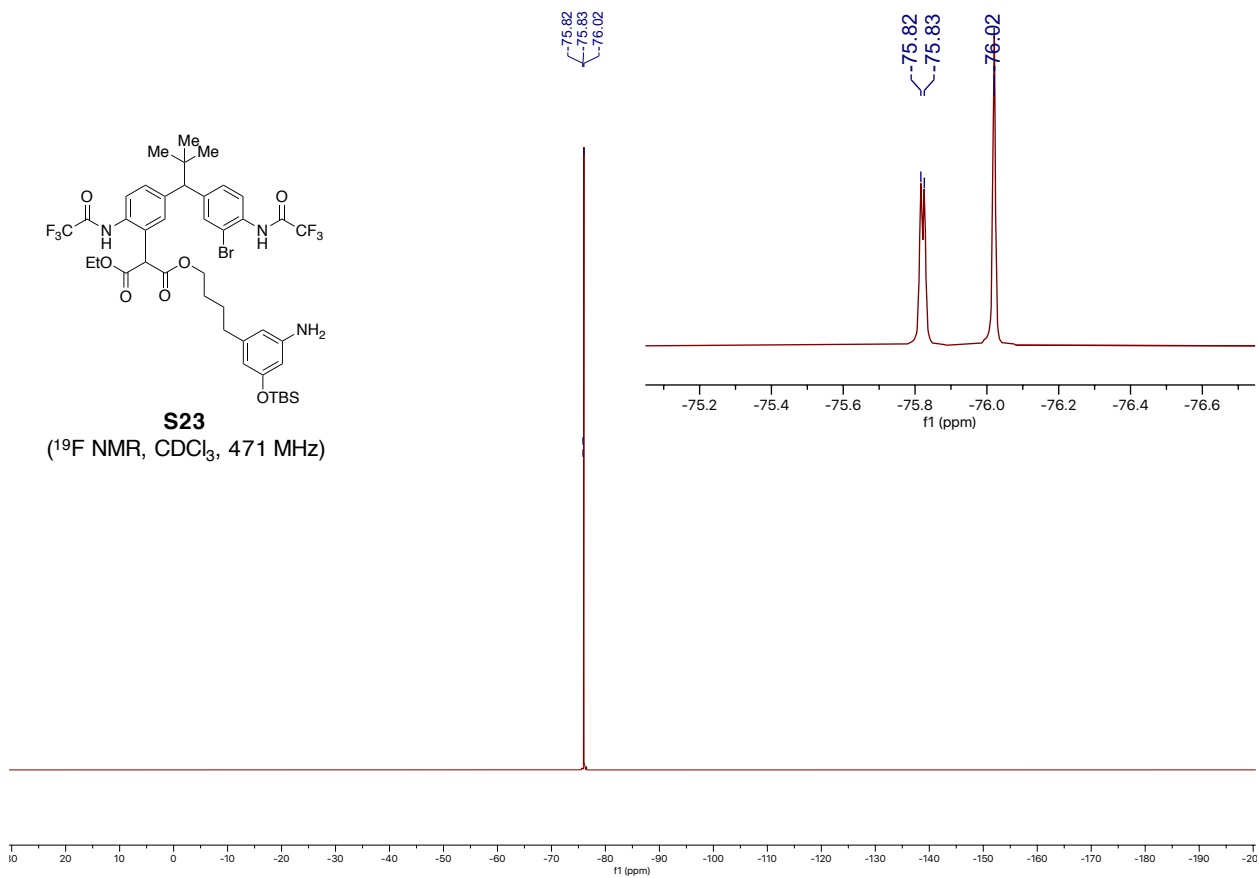

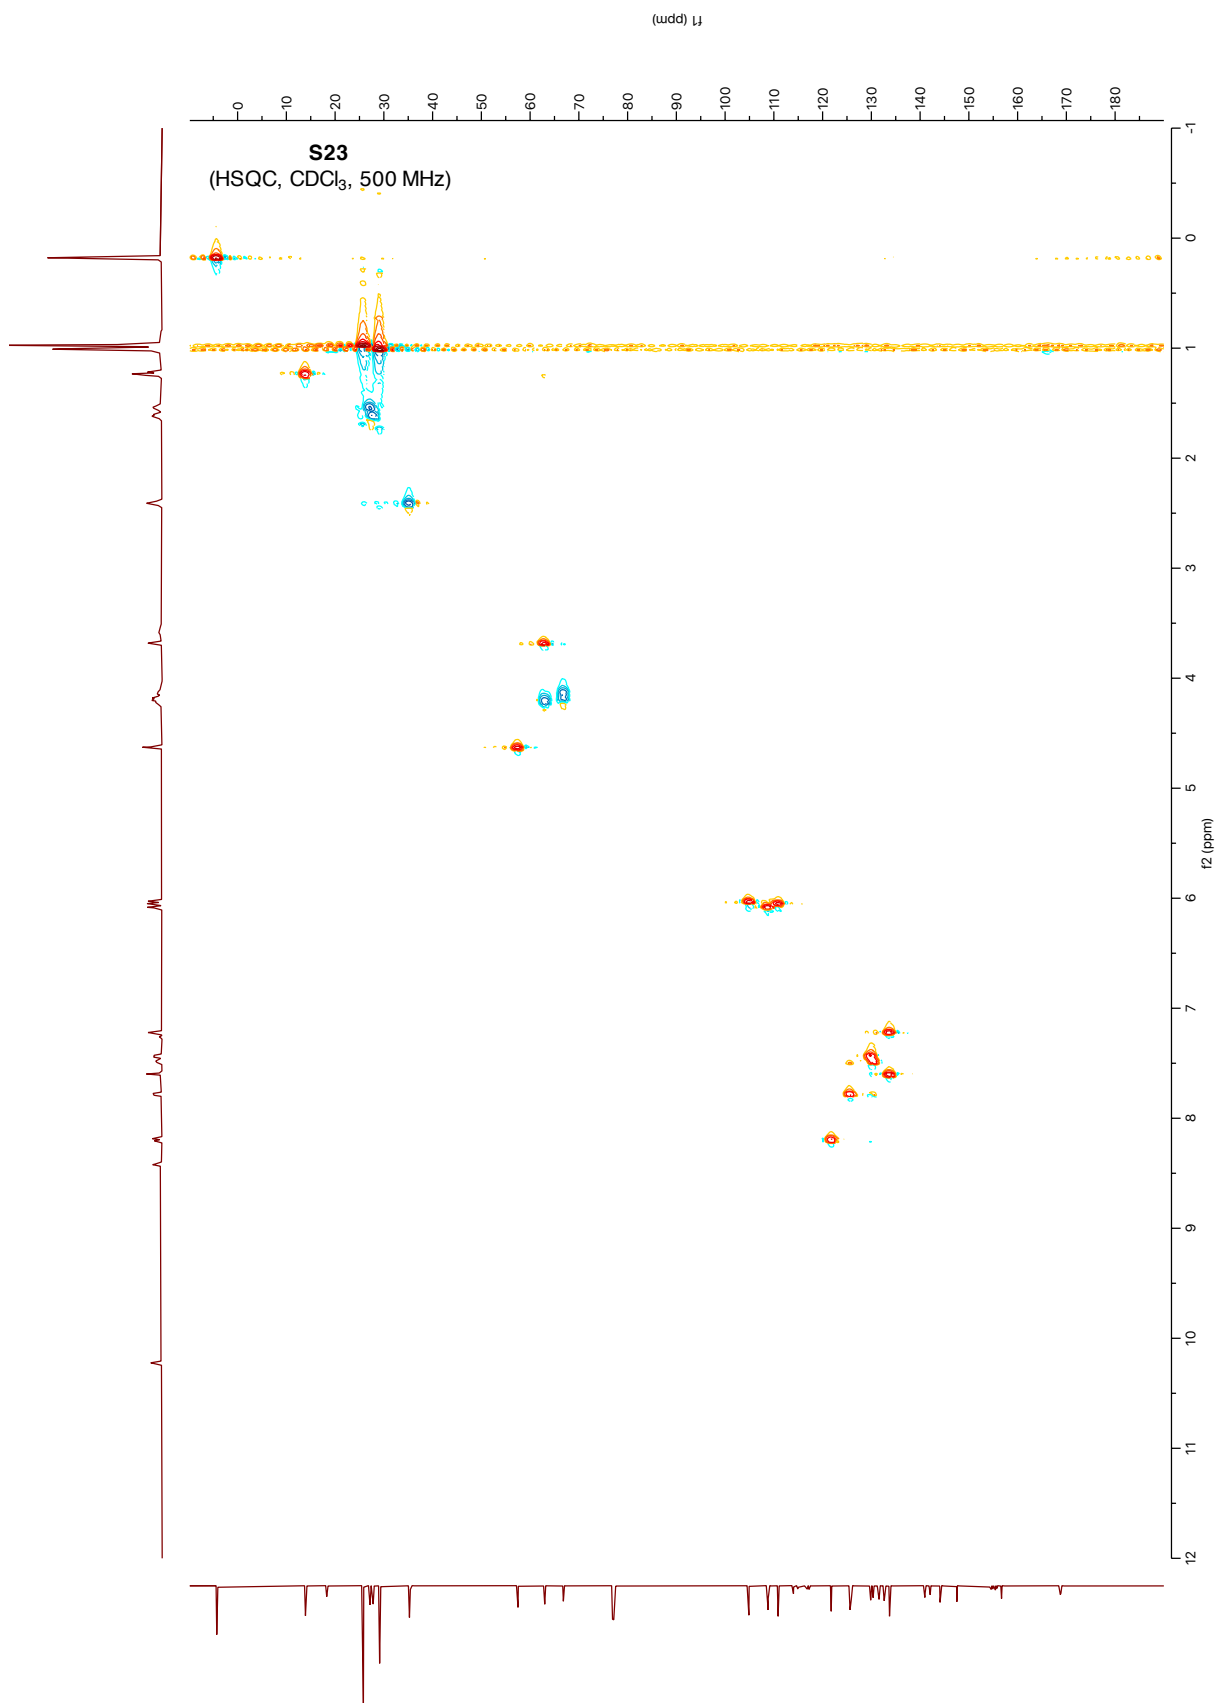

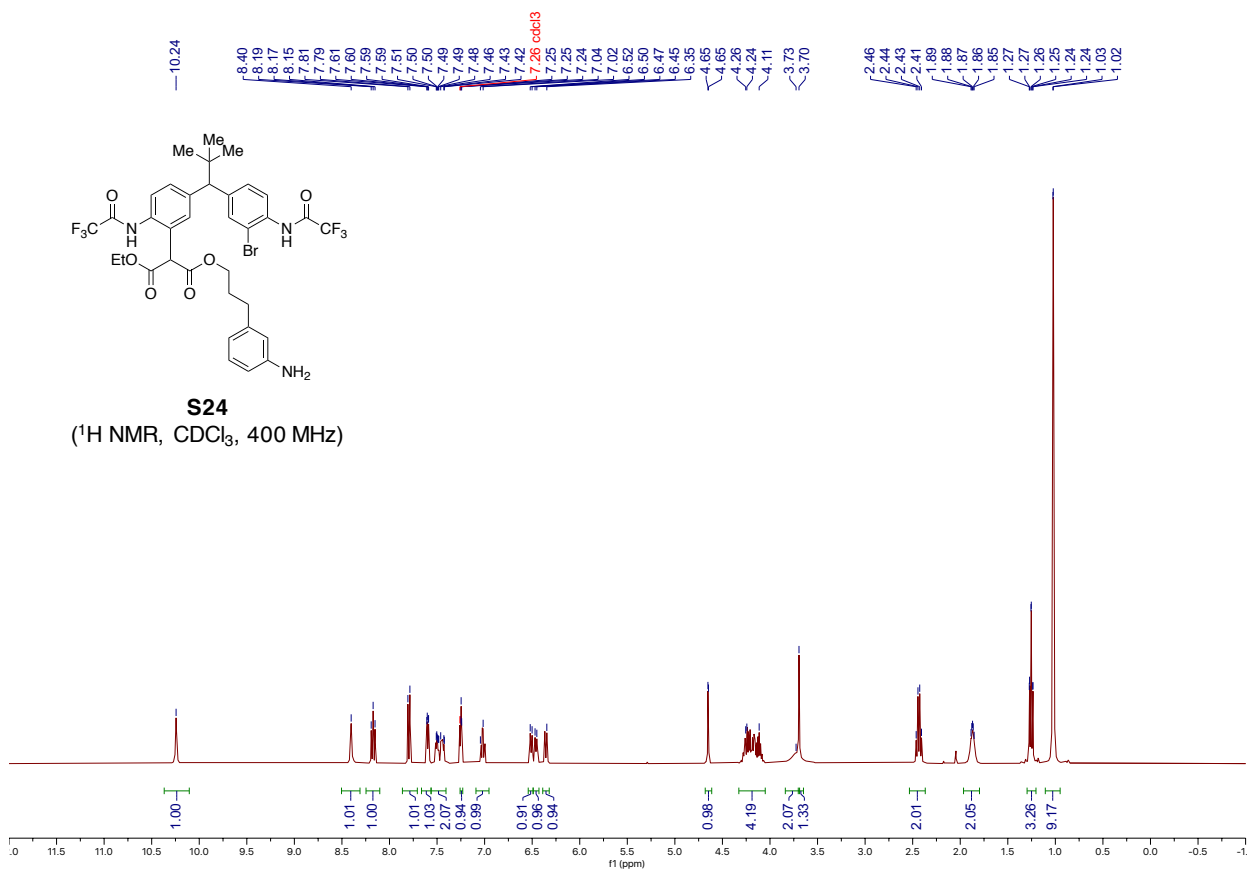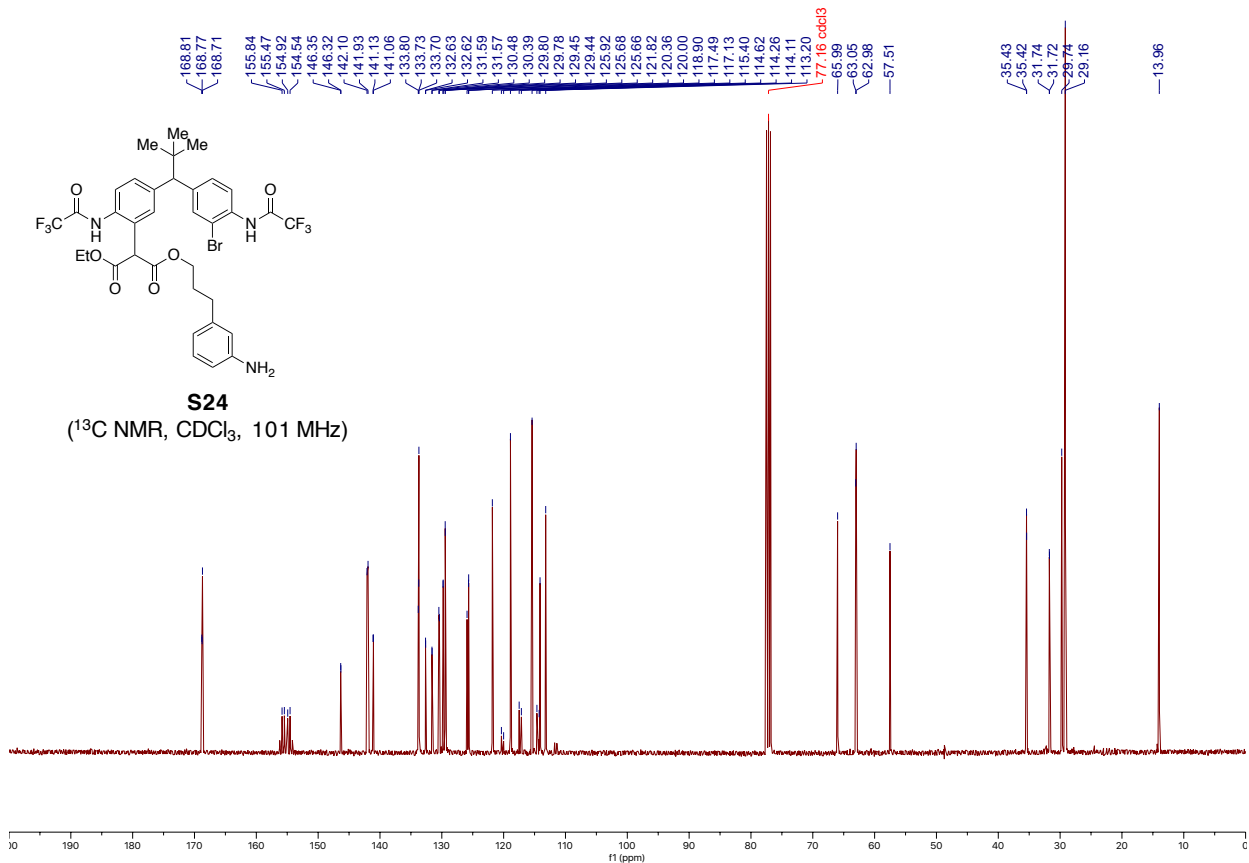

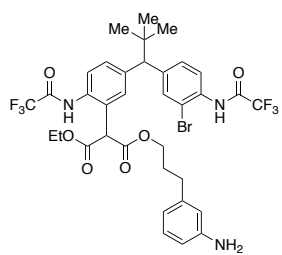

**S24**  
(<sup>19</sup>F NMR, CDCl<sub>3</sub>, 376 MHz)

-75.84  
-76.04

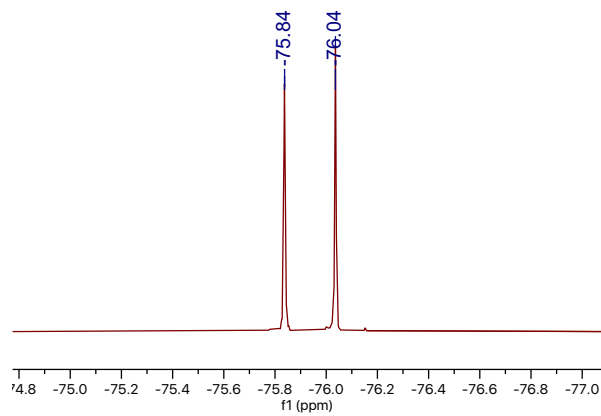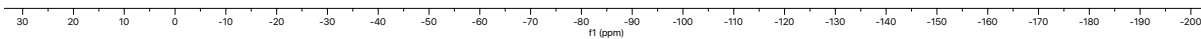



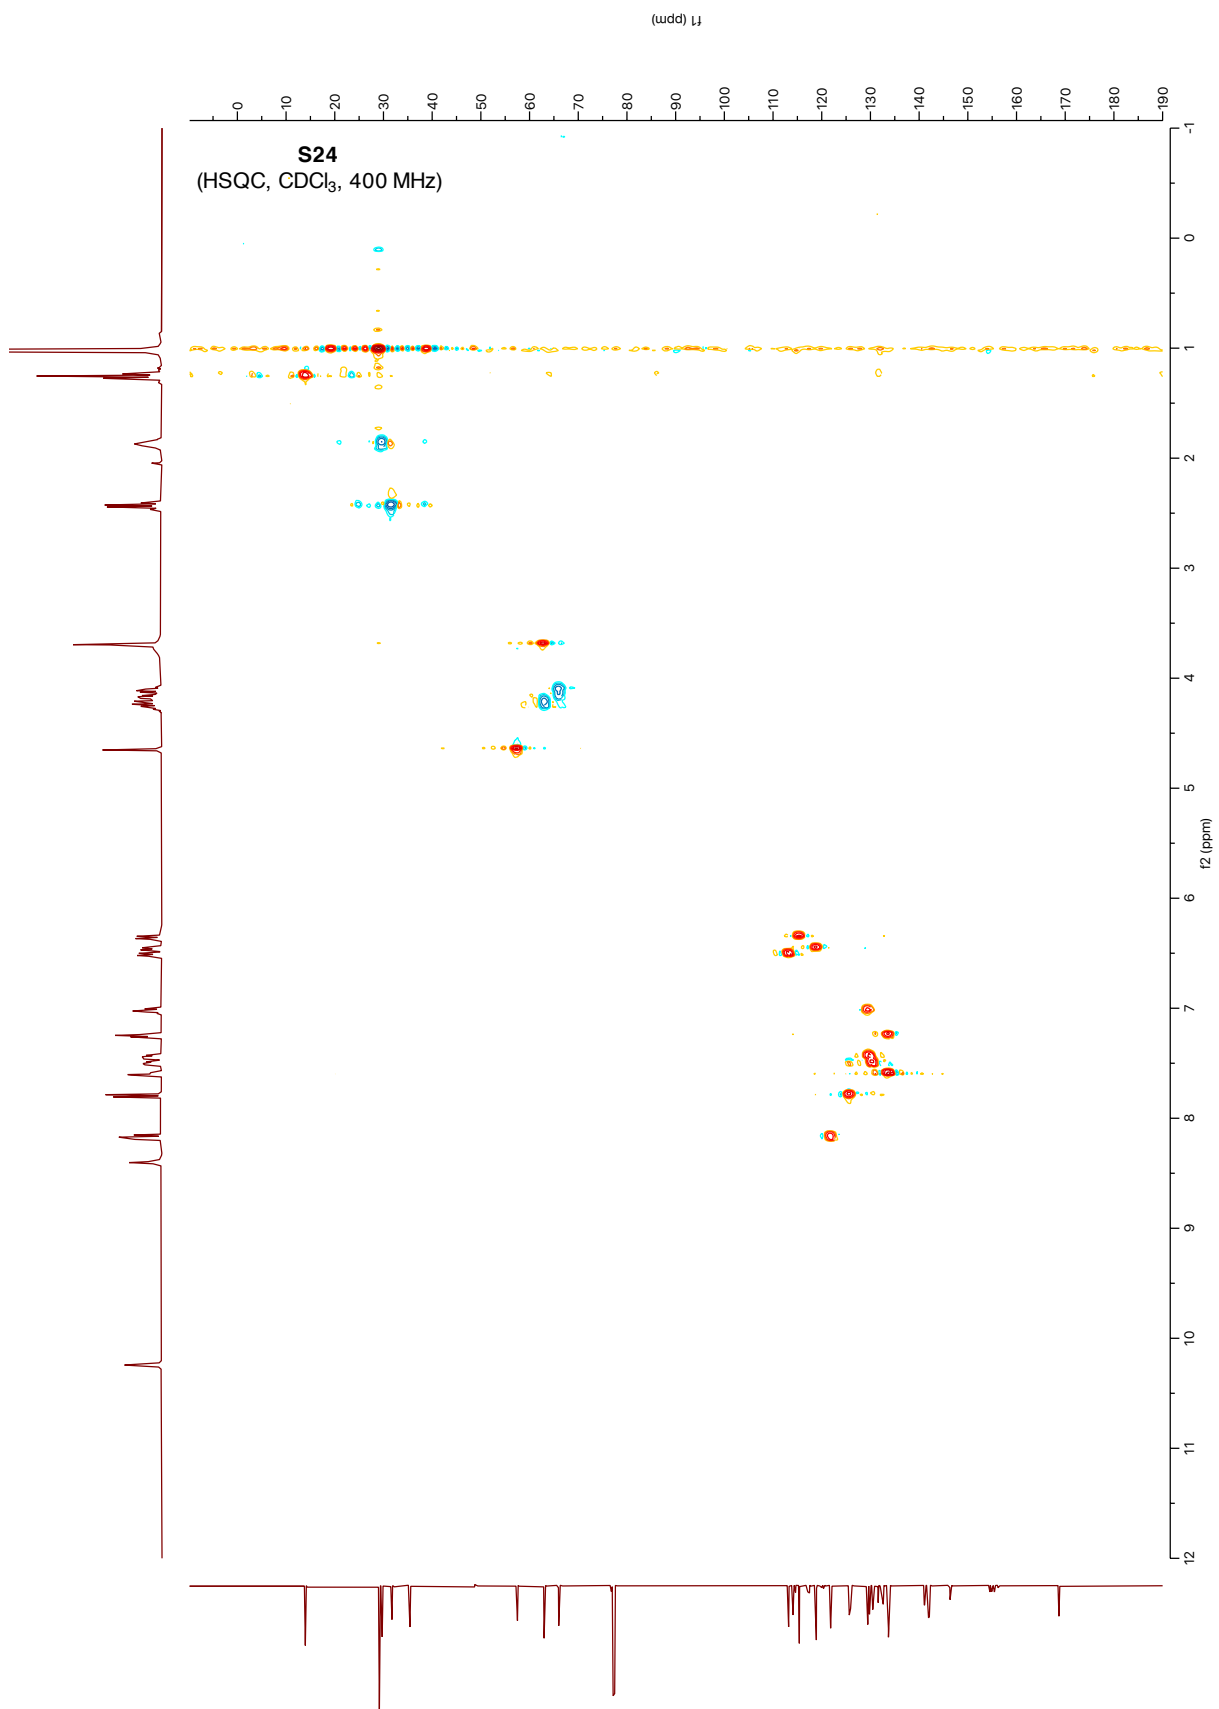

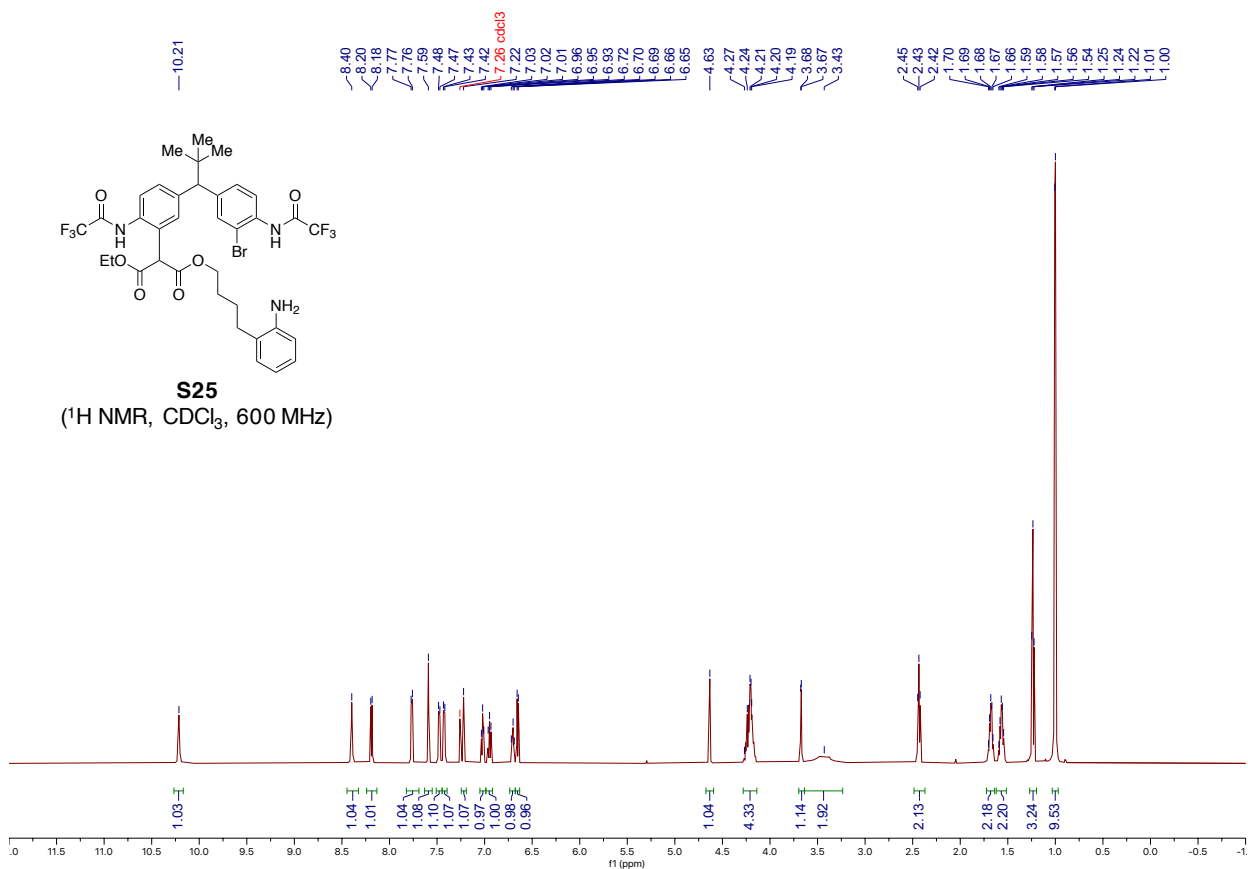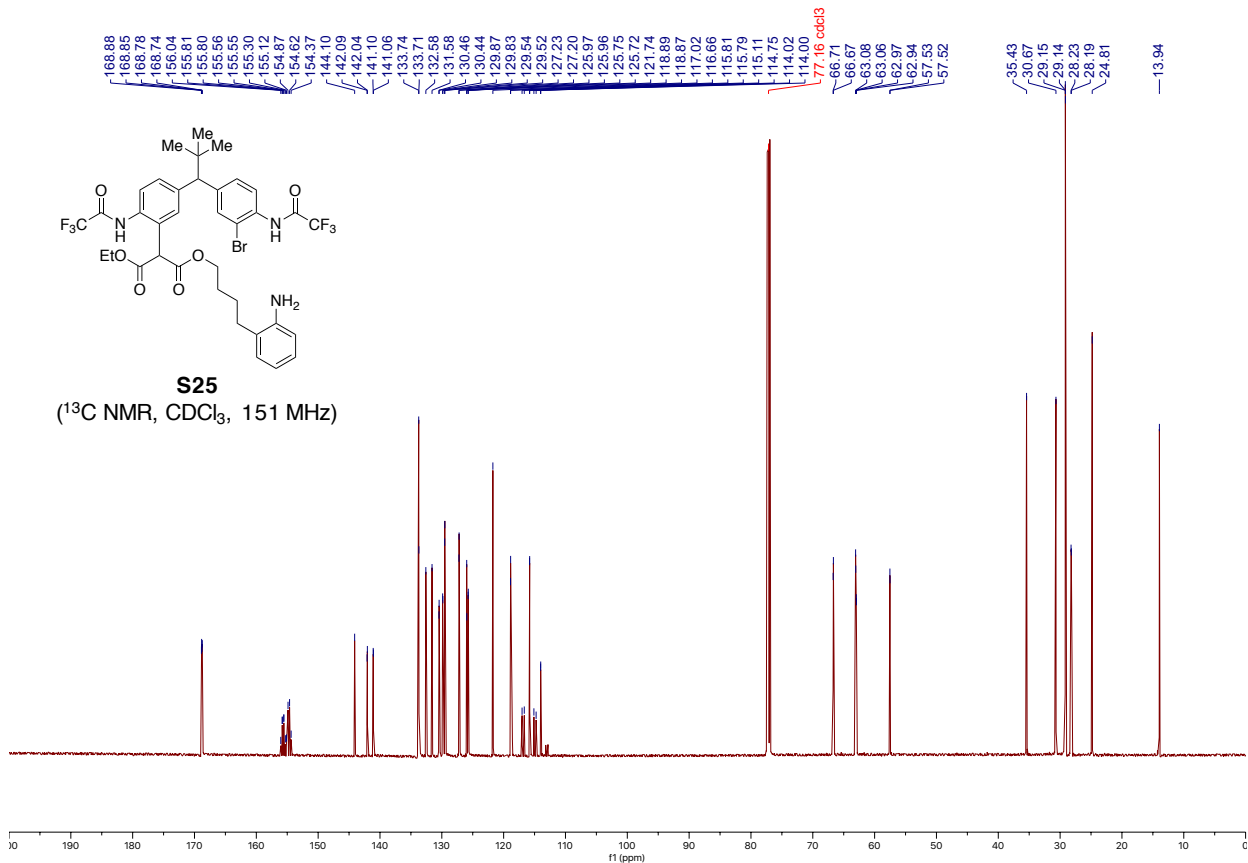

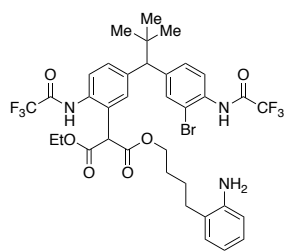

**S25**  
(<sup>19</sup>F NMR, CDCl<sub>3</sub>, 471 MHz)

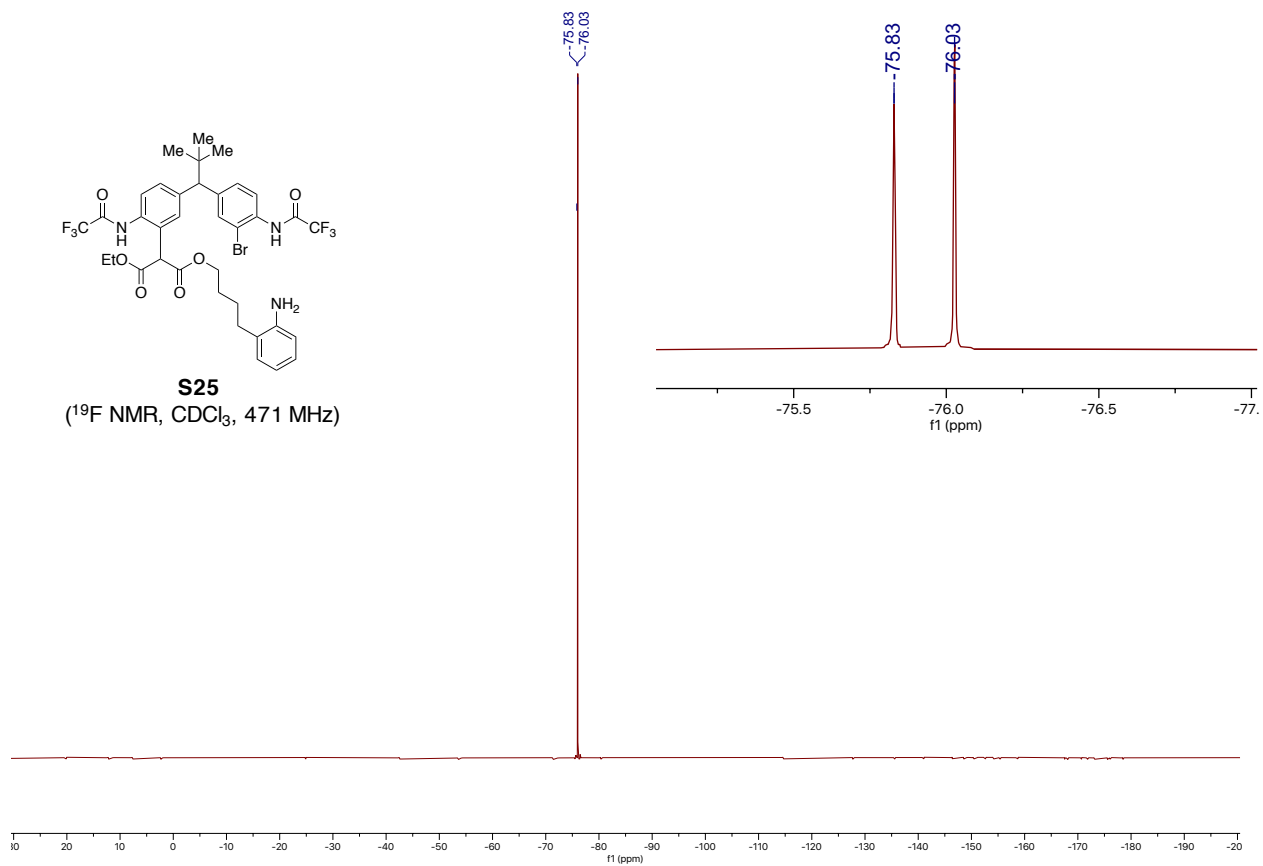

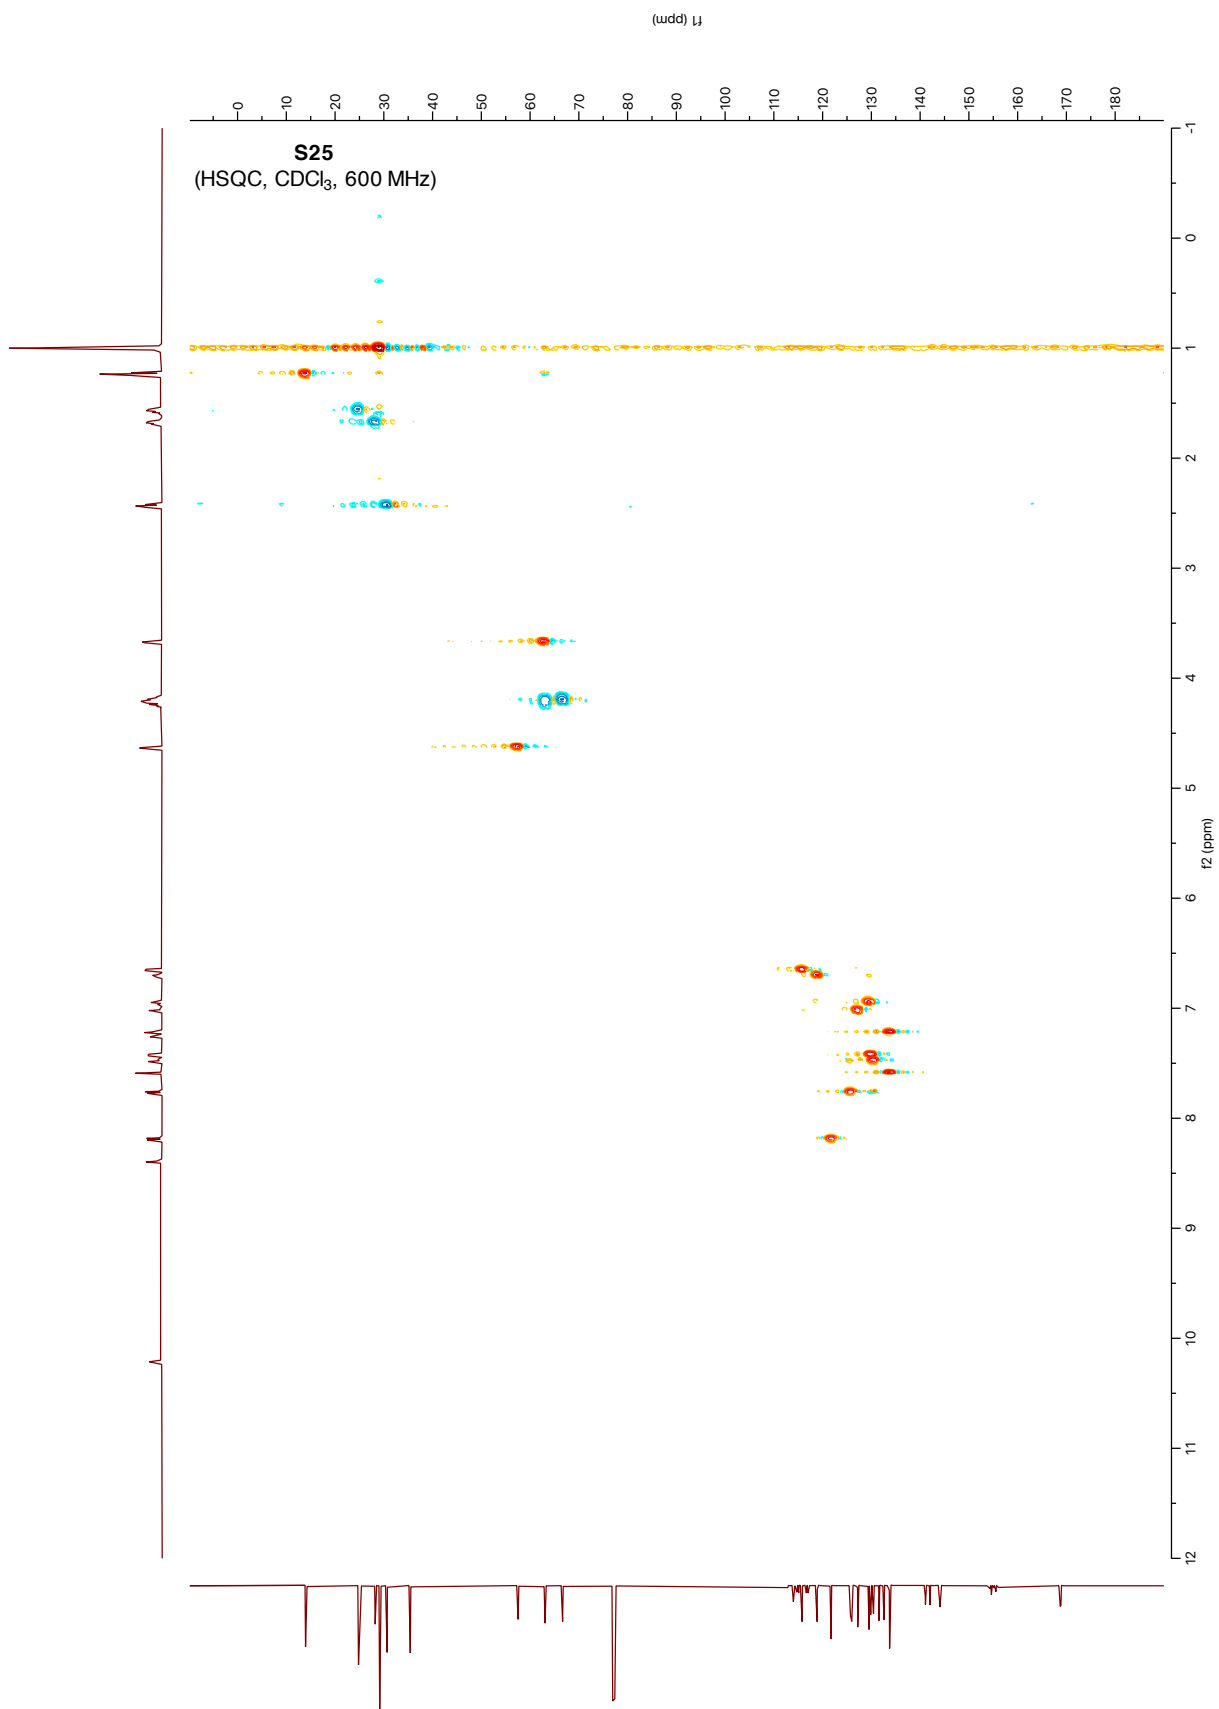

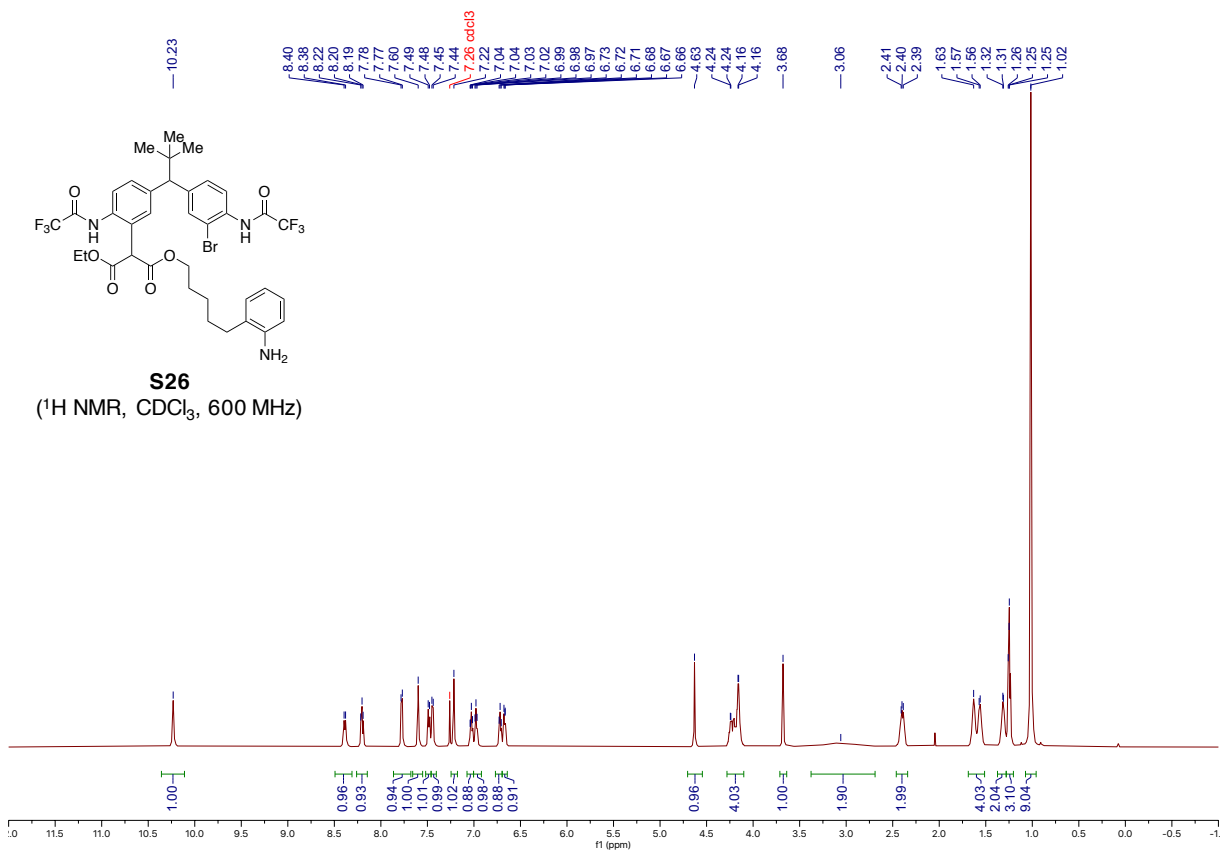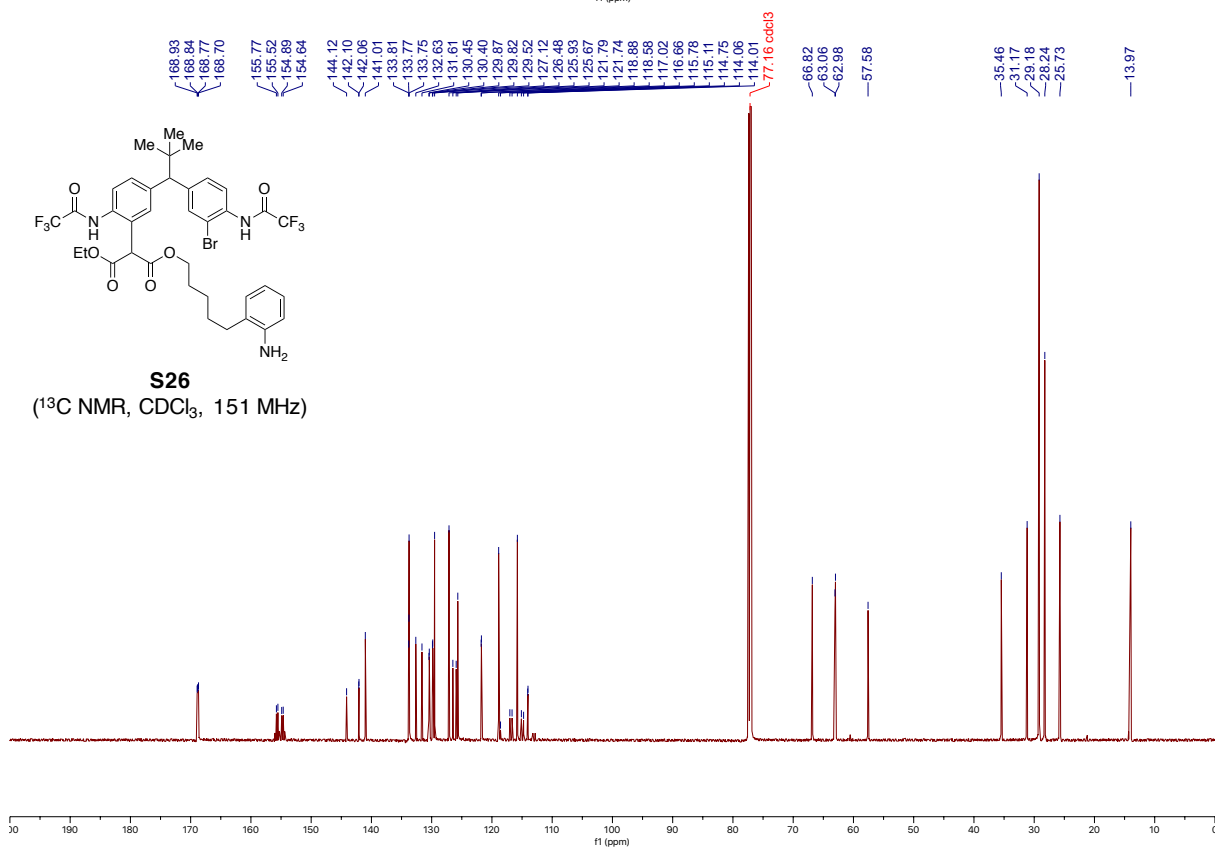

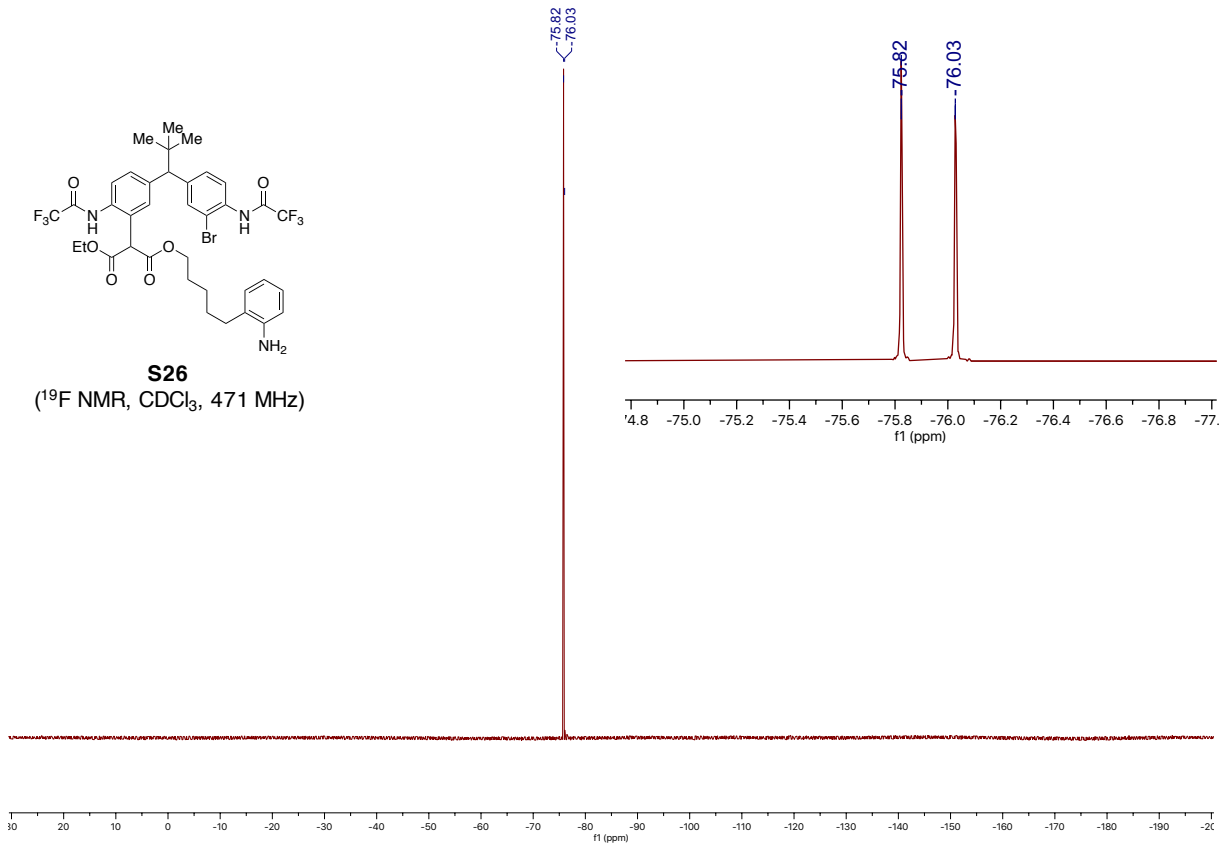

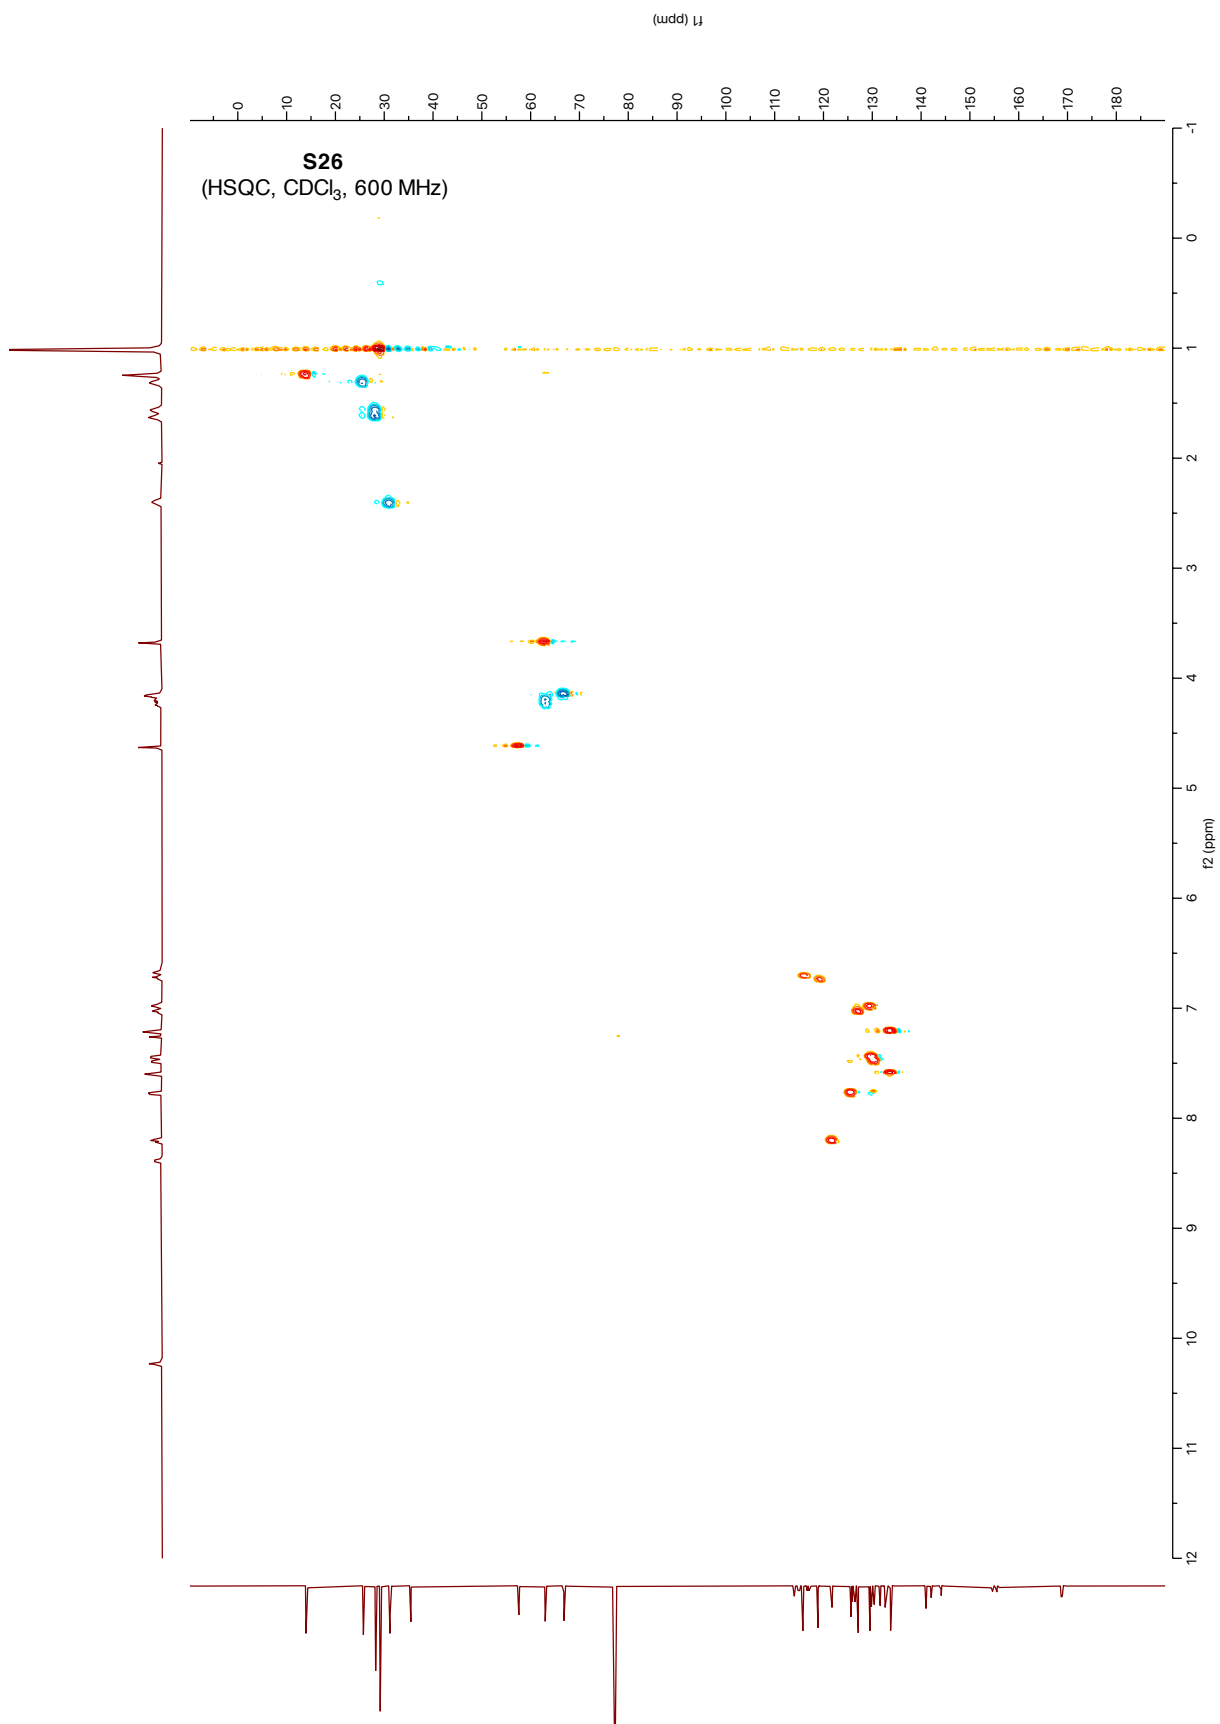

## 8.5 HPLC Traces of Linear Precursors (3a-3f)

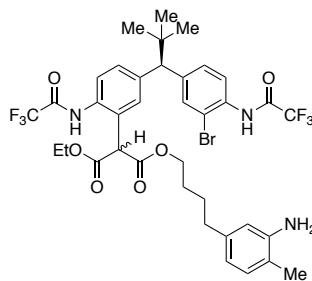

**3a**

Chiralpak AD-H  
10% IPA/Hexanes, 1.00 mL/min, 25 °C, 250 nm

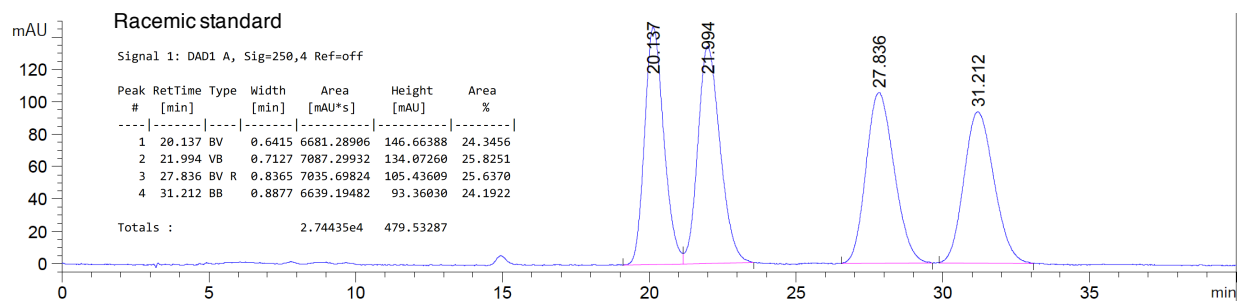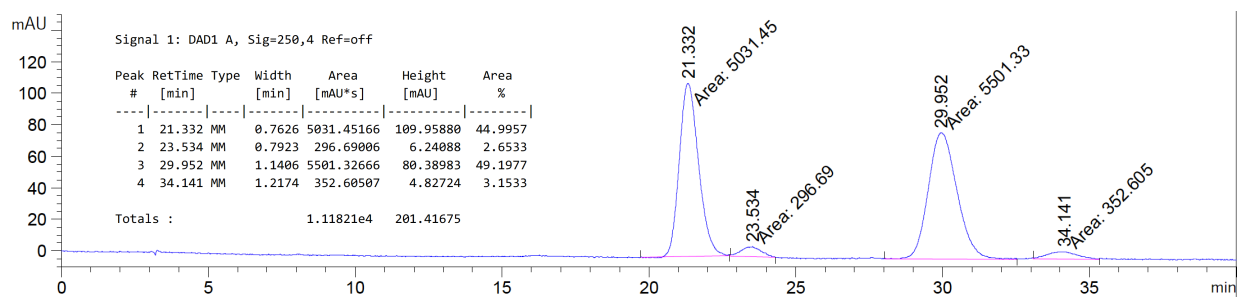

Recovered SM (3a) after macrocyclization with mismatched ligand L2

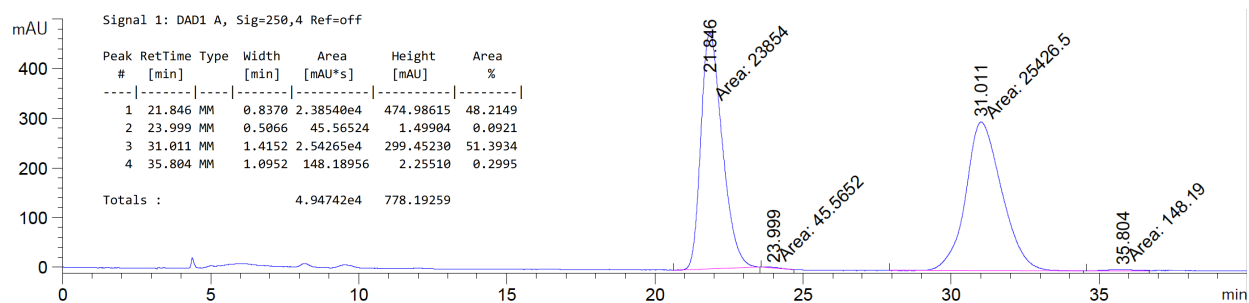



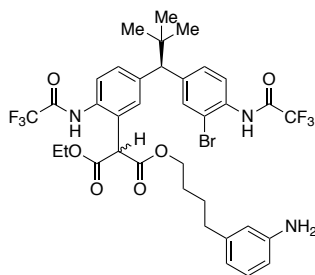**3b**

Chiralpak AD-H

10% IPA/Hexanes, 1.00 mL/min, 25 °C, 250 nm

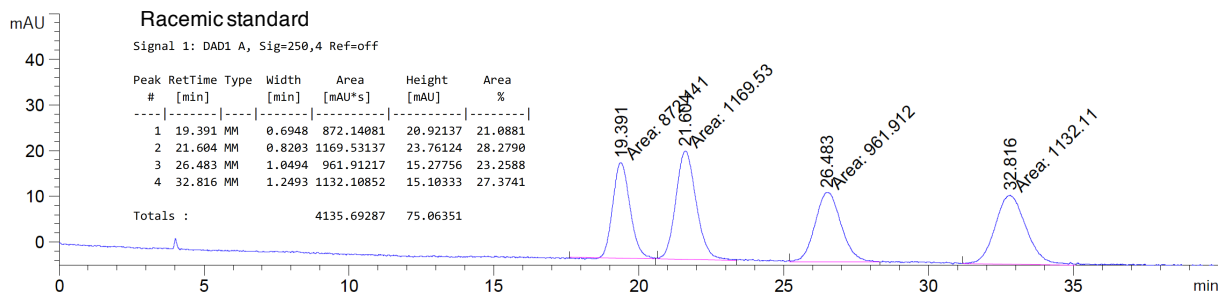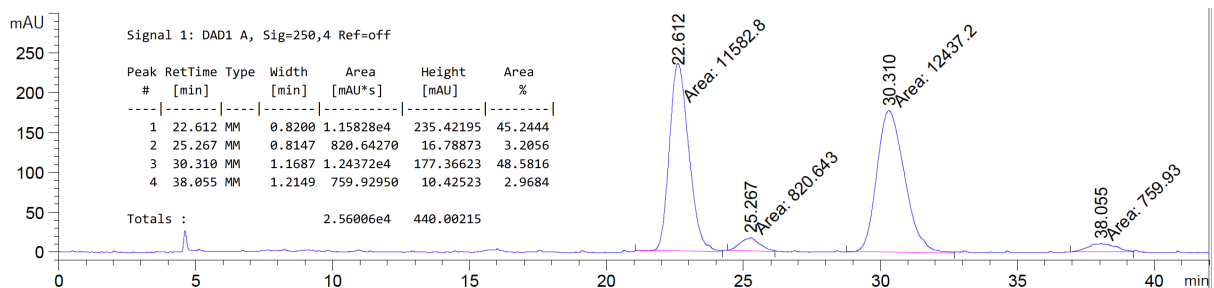**Recovered 3b after macrocyclization with mismatched ligand L2**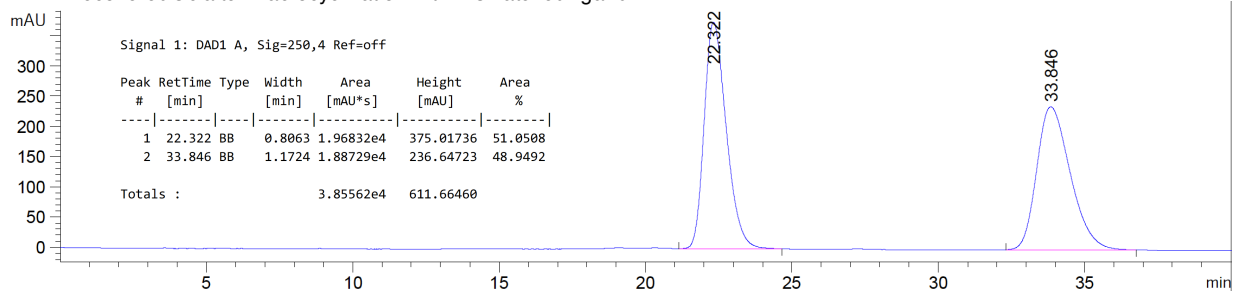

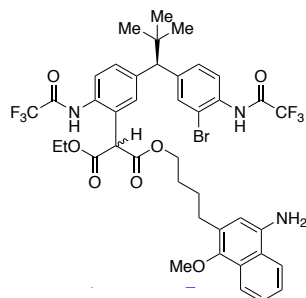

**3c**  
Chiralpak AD-H  
6% EtOH/Hexanes, 1.200 mL/min, 25 °C, 250 nm

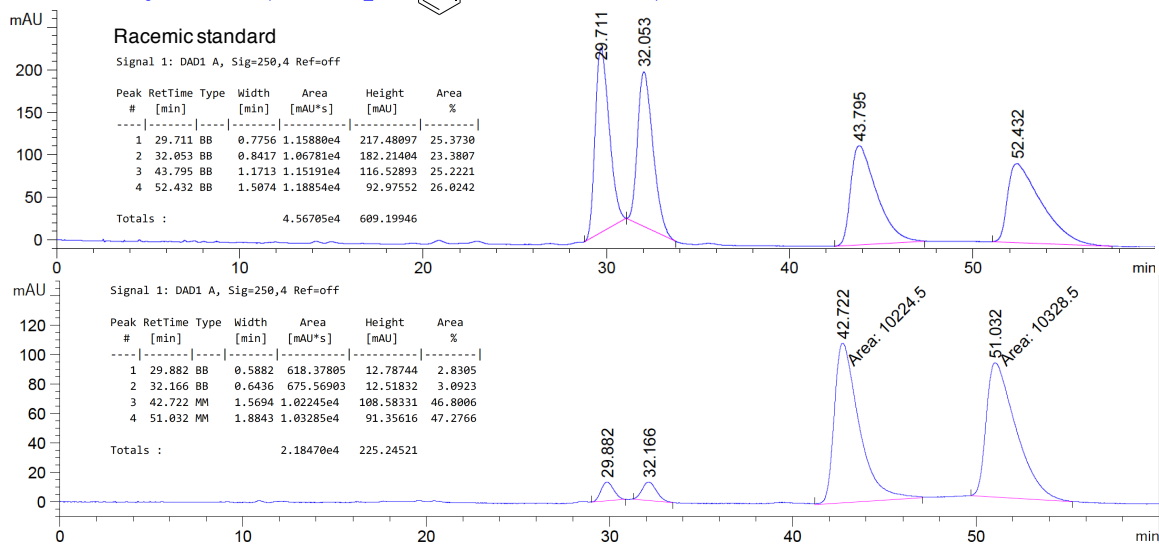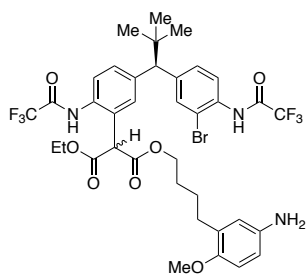

**3d**  
Chiralpak AD-H  
7% IPA/Hexanes, 1.250 mL/min, 25 °C, 250 nm

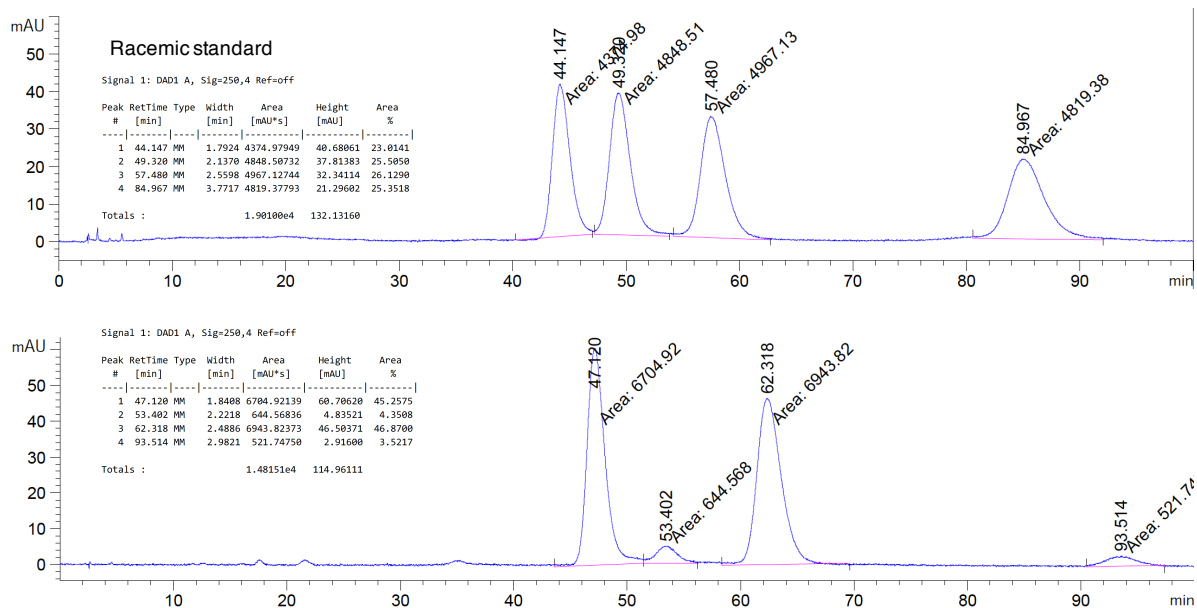

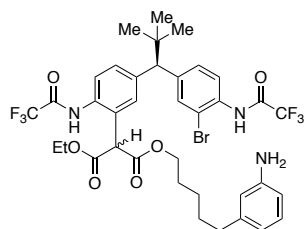

**3e**  
Chiralpak AD-H  
4% EtOH/Hexanes, 1.25 mL/min, 25 °C, 254 nm

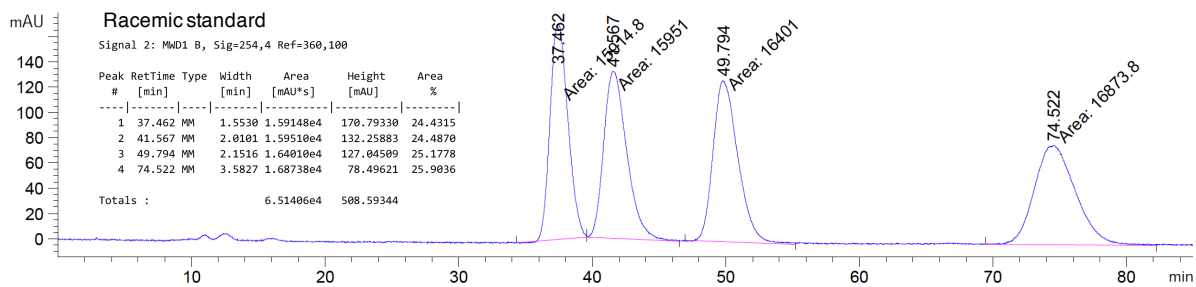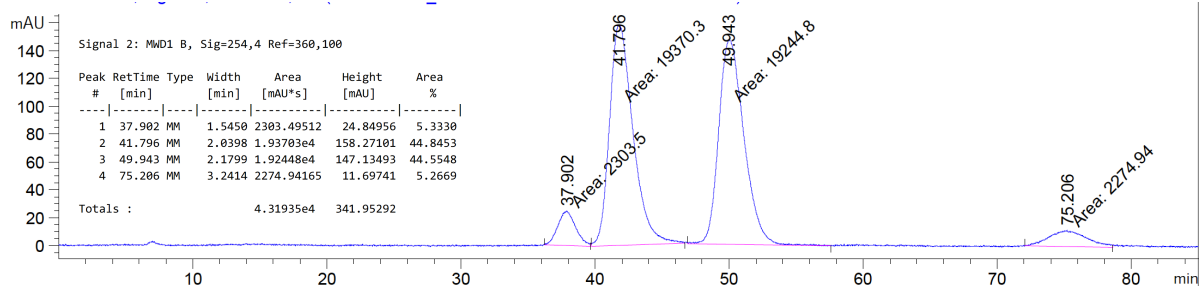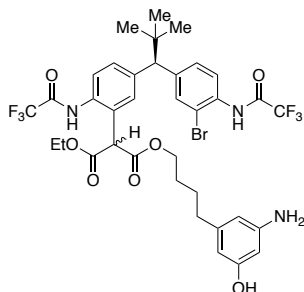

**3f**  
Chiralpak AD-H  
16% IPA/Hexanes, 1.25 mL/min, 25 °C, 250 nm

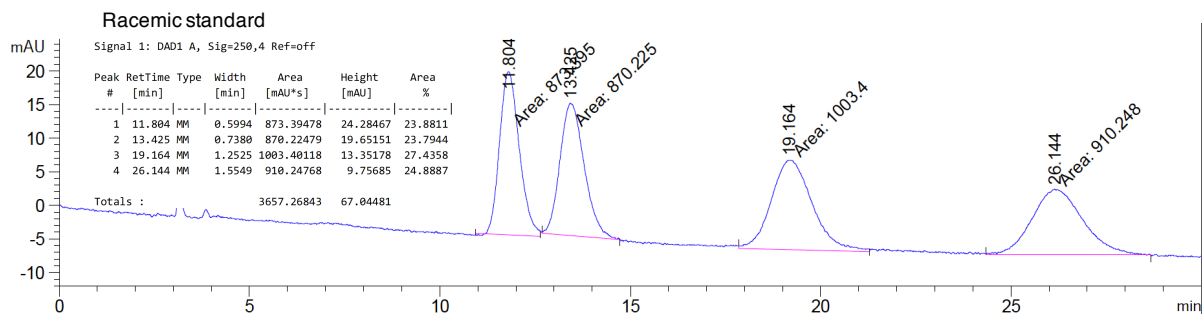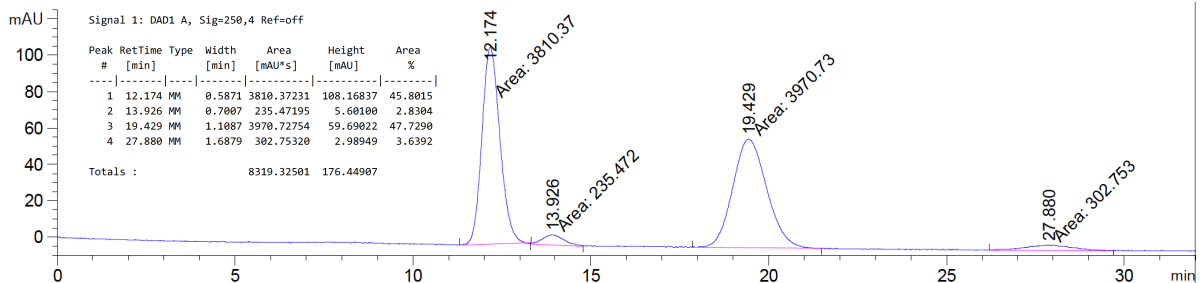

## 9. Reaction Optimizations and Procedures for Macrocyclization via Cu-catalyzed intramolecular C–N cross-coupling

### 9.1 Procedure 7: Protocols for Small-Scale Intramolecular Ullmann cross-coupling

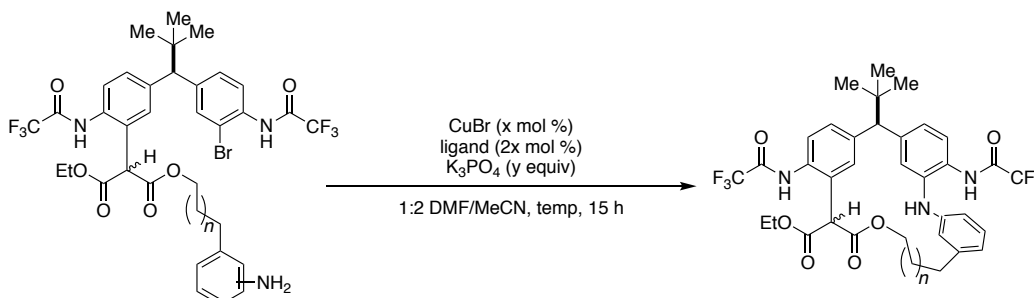

To an oven dried two-dram vial equipped with magnetic stir bar was added Cu(I) source (0.007 mmol, 0.10 equiv), peptide ligand (0.014 mmol, 0.20 equiv) and flame-dried  $\text{K}_3\text{PO}_4$  (0.294 mmol, 4.20 equiv). The flask was sealed with a septa cap and further secured with Teflon tape. The flask was sparged with  $\text{N}_2$  for 10 minutes. Diarylmethane (0.07 mmol, 1.00 equiv) was added to a separate oven dried dram vial and sparged with  $\text{N}_2$  for 5 minutes. The vials were taken into the glove box. A 1:2 DMF/MeCN solution (0.36 mL, 0.19 M) was added to the vial containing Cu(I). The resulting reaction mixture was left to stir for 10 minutes. Diarylmethane was dissolved in a 1:2 DMF/MeCN solution (0.1 mL) and added to the mixture. The vial was further rinsed with DMF/MeCN (0.1 mL) and added to the stirring mixture. The reaction mixture was capped and secured with Teflon tape, then left to stir for 15 h at the indicated temperature. After 15 h, the reaction mixture was diluted with EtOAc and transferred to a separatory funnel. The organic layer was washed with a solution of saturated  $\text{NH}_4\text{Cl}$  (aq). The organic layer was separated and the aqueous layer was extracted with EtOAc  $\times$  3. Combined organic layers were washed with sat. NaCl (aq). The combined organic layers were then dried over anhydrous  $\text{Na}_2\text{SO}_4$ , filtered, and concentrated in vacuo. Percent yield was determined via  $^1\text{H}$  NMR by comparing the relative integration of malonate peak of the desired product to an internal NMR standard of 1,4-bis(trimethylsilyl)benzene (see Figure S1).

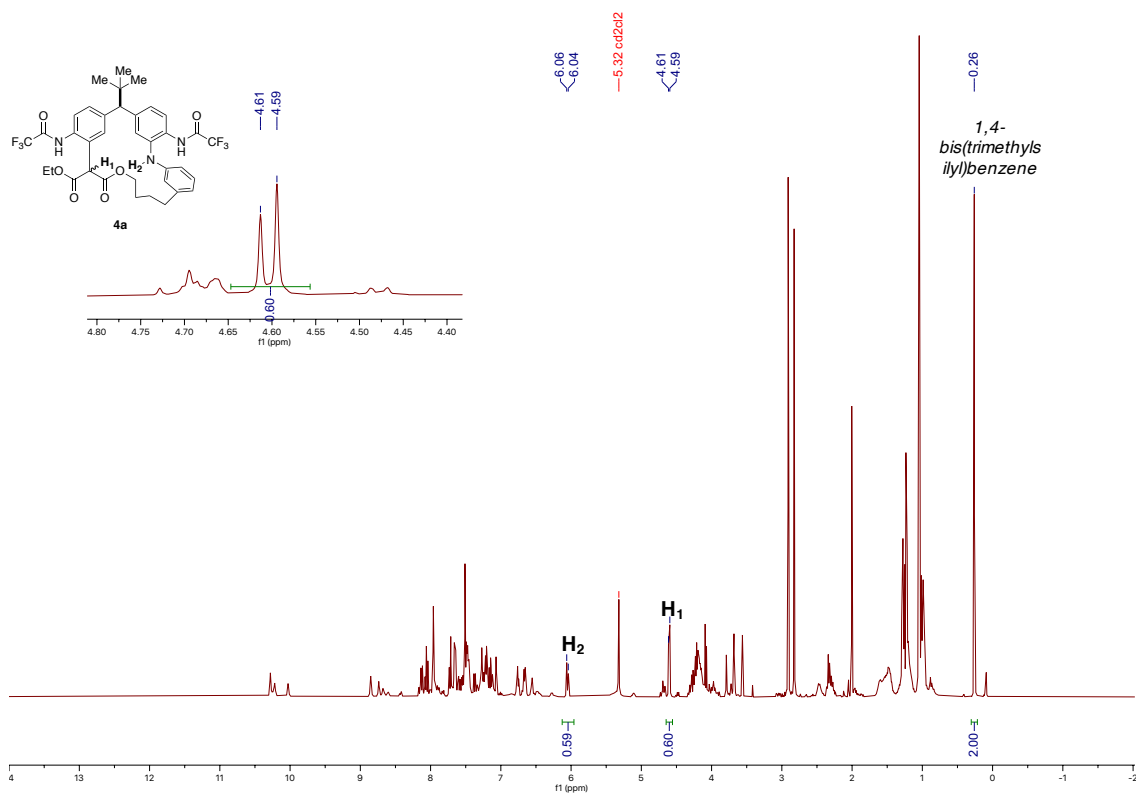

Figure S1. Sample of Determination of NMR yield.

## 9.2 Identification of Optimal Model Substrates<sup>a,b,c</sup>

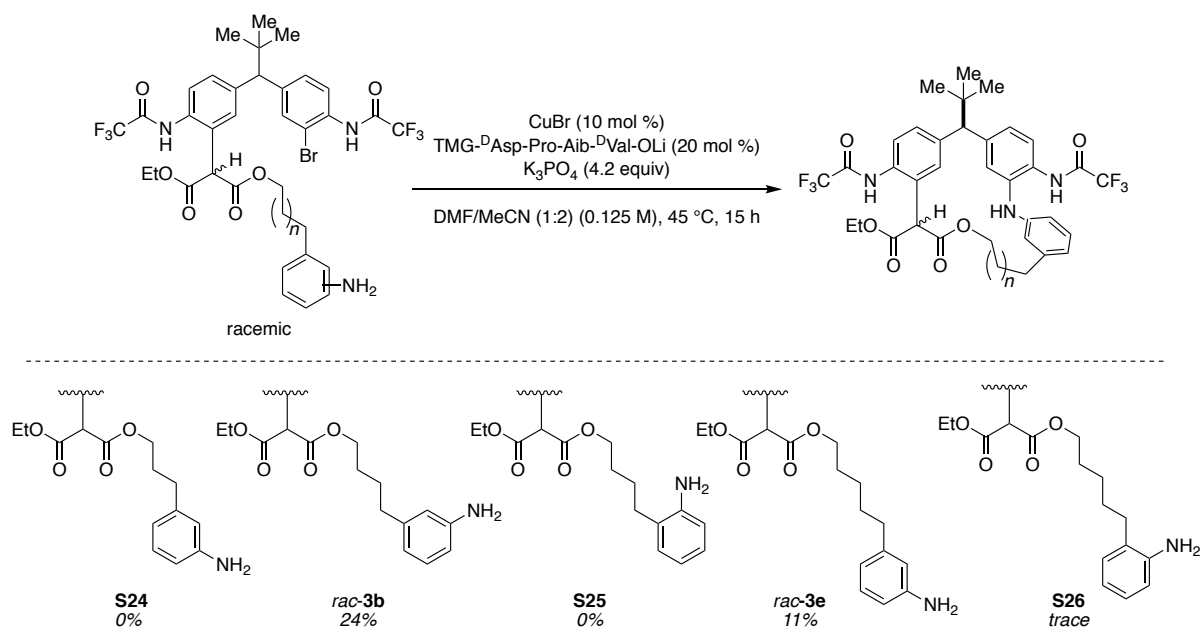

a) Reactions were executed according to **Procedure 7**. b) Yield was determined using  $^1\text{H}$  NMR by comparing to an internal NMR standard 1,4-bis(trimethylsilyl)benzene. c) Linear precursors were prepared using **Procedure 5**.

### 9.3 Table S2: Cu(I) Screen

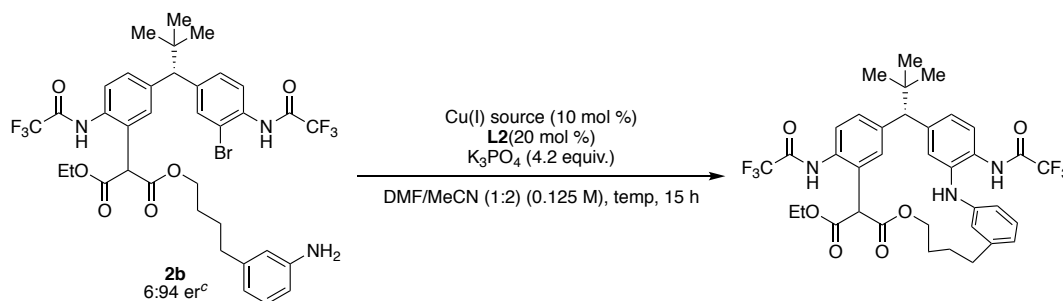

| Entry <sup>a</sup> | Cu (I)                                | Temp (°C) | Yield (%) <sup>b</sup> |
|--------------------|---------------------------------------|-----------|------------------------|
| 1                  | CuBr                                  | 45        | 44                     |
| 2                  | CuBr                                  | 23        | 47                     |
| 3                  | CuI                                   | 45        | 39                     |
| 4                  | CuI                                   | 23        | 48                     |
| 5                  | Cu(MeCN) <sub>4</sub> BF <sub>4</sub> | 45        | 36                     |

a) Reactions were executed according to **Procedure 7**. b) Yield was determined using  $^1\text{H}$  NMR by comparing to an internal standard 1,4-bis(trimethylsilyl)benzene. c) **2b** was prepared using *ent*-**L1** following **Procedure 6**. In the main text, **2b** was prepared using **L1**.

### 9.4 Table S3: Concentration Effects

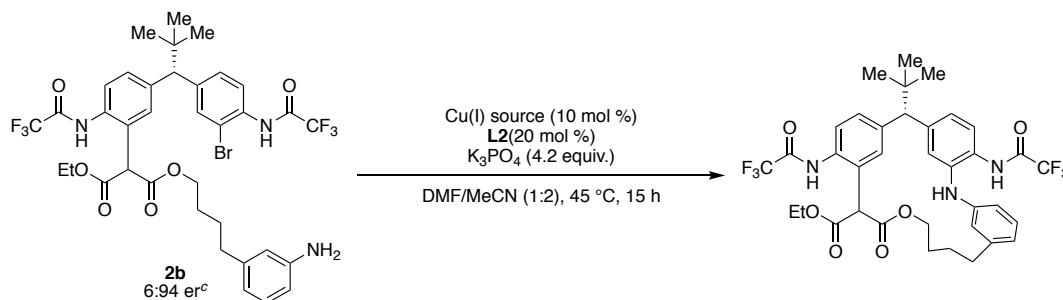

| Entry <sup>a</sup> | Concentration (M) | Yield (%) <sup>b</sup> |
|--------------------|-------------------|------------------------|
| 1                  | 0.25              | 17                     |
| 2                  | 0.125             | 44                     |
| 3                  | 0.06              | 33                     |
| 4                  | 0.05              | 23                     |
| 5                  | 0.01              | 9                      |

a) Reactions were executed according to **Procedure 7**. b) Yields were determined using  $^1\text{H}$  NMR by comparing to an internal standard 1,4-bis(trimethylsilyl)benzene. c) **2b** was prepared using *ent*-**L1** following **Procedure 6**. In the main text, **2b** was prepared using **L1**.

### 9.5 Table S4: Temperature & Copper Loading

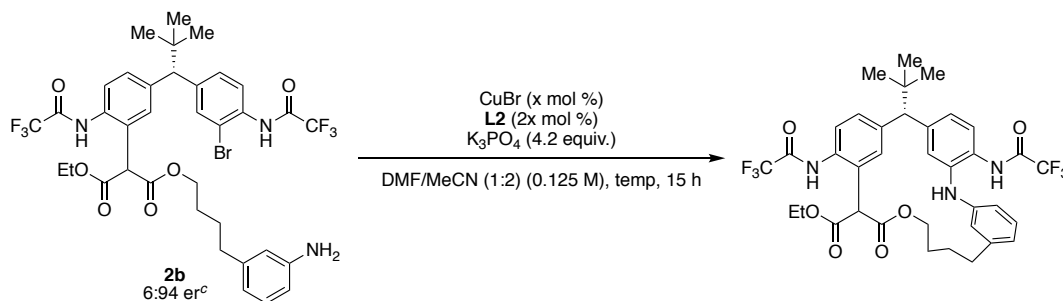

| Entry <sup>a,c</sup> | Cu(I) (mol %)   | Temp (°C) | Yield (%) <sup>b,d</sup> |
|----------------------|-----------------|-----------|--------------------------|
| 1                    | CuBr (5 mol %)  | 45        | 34                       |
| 2                    | CuBr (10 mol %) | 45        | 44                       |
| 3                    | CuBr (10 mol %) | 23        | 47                       |
| 3                    | CuBr (20 mol %) | 45        | 50                       |
| 4                    | CuBr (20 mol %) | 23        | 61                       |
| 5                    | CuBr (20 mol %) | 30        | 60                       |

a) Reactions were executed according to **Procedure 7**. b) Yield was determined using  $^1\text{H}$  NMR by comparing to an internal standard 1,4-bis(trimethylsilyl)benzene. c) All reactions carried out with 1:2 ratio of Cu(I):peptide ligand based on previous optimization.<sup>2</sup> d) Reaction proceeds at room temperature, but 45 °C was chosen as the optimal condition due to most consistent reproducibility outside the glovebox.

## 10. Procedure 8: Macrocyclization of Diarylmethanes Under Optimized Conditions

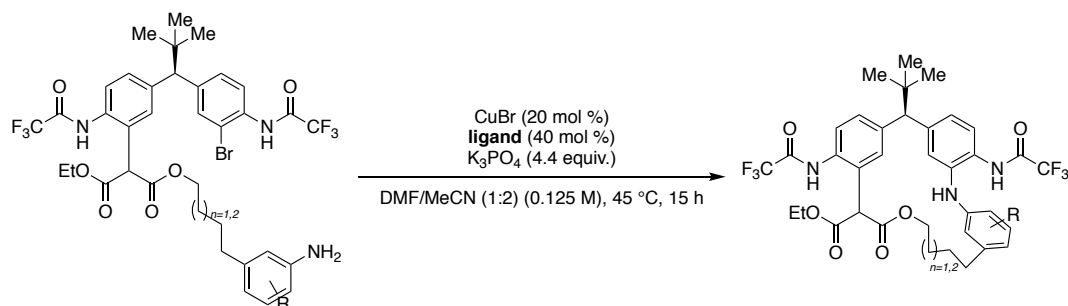

$\text{K}_3\text{PO}_4$  (0.1401 g, 0.66 mmol, 4.40 equiv) was flamed-dried under vacuum in a 5-mL Schlenk flask. Upon cooling to room temperature,  $\text{CuBr}$  (0.0043 g, 0.03 mmol, 0.20 equiv), peptide ligand (0.06 mmol, 0.40 equiv) and a magnetic stir bar were added to the flask. The flask was sealed with a new rubber septum and further secured with Parafilm®. The flask was evacuated for 5 minutes and backfilled with  $\text{N}_2$ . This process was repeated two additional times. 1:2 DMF/MeCN mixture (0.8 mL) was added through the septum, and the mixture was allowed to stir for 15 min at room temperature, after which diarylmethane **3a-f** (0.15 mmol, 1.00 equiv) in MeCN (0.2 mL) was added. The vial was rinsed with DMF (0.2 mL) which was also added to the reaction mixture. The reaction mixture was left to stir for 15 h at 45 °C. After 15 h, the reaction mixture was diluted with EtOAc (10 mL) and transferred to a separatory funnel. The organic layer washed with saturated  $\text{NH}_4\text{Cl}$  (aq) (10 mL). The organic layer was separated and the aqueous layer was extracted with EtOAc (5 mL  $\times$  3). Combined organic layers were washed with sat.  $\text{NaCl}$  (aq) (30 mL), dried over  $\text{Na}_2\text{SO}_4$ , filtered, and concentrated in vacuo. The crude material was purified by flash chromatography with EtOAc/Hex gradient.

## 11. Kinetic Resolution of Diarylmethanes Under Optimized Conditions

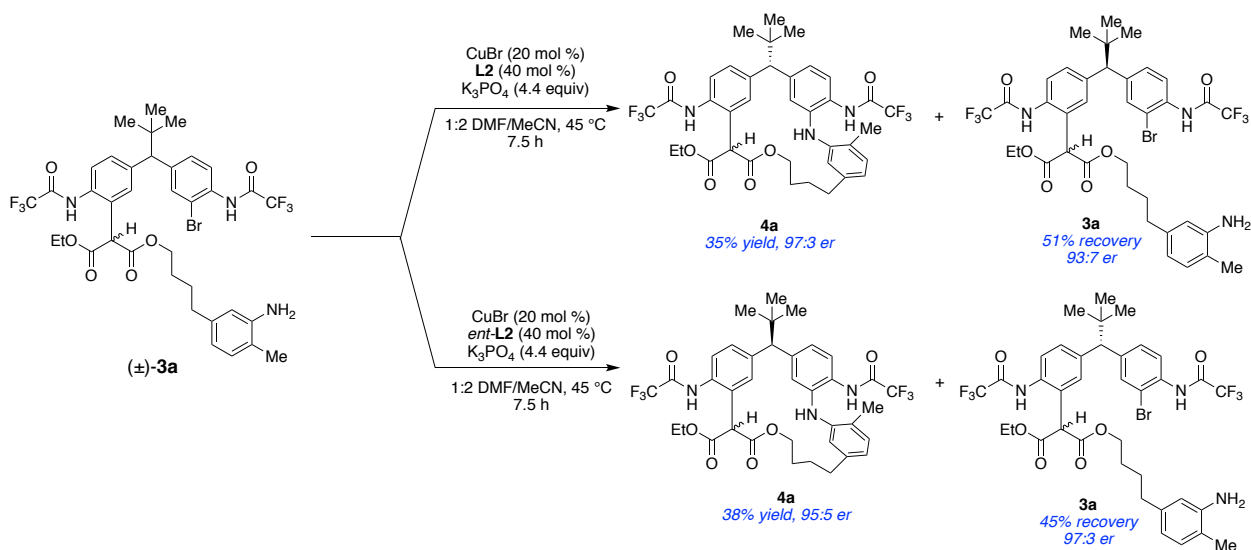



Reactions were executed according to **Procedure 8** for the indicated time.

**HPLC Conditions:** Chiralpak® AD-H column, 10% IPA/Hex eluent, 1.00 mL/min flow rate, 25 °C, 250 nm.  
See SI section 8.5 for racemic standard.

MWD1 D, Sig=250,4 Ref=off (JH/JH-1-168\_AD-H 2021-04-14 16-02-401FC-0101.D)

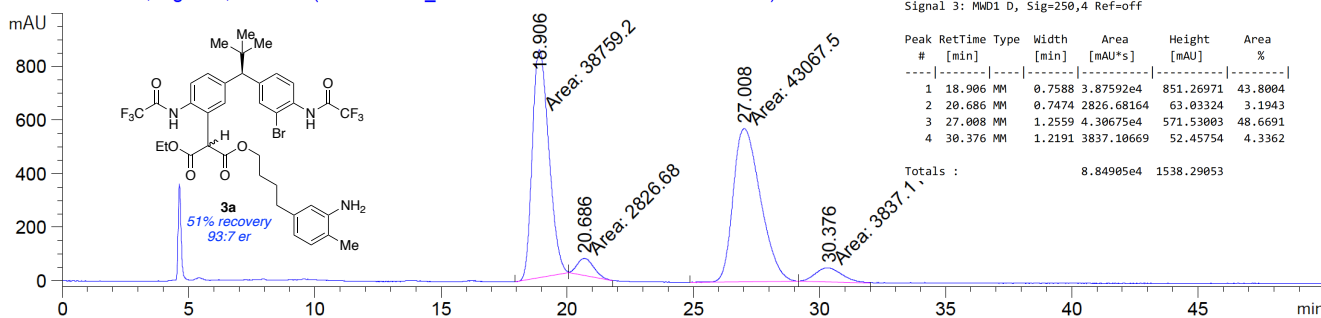

MWD1 D, Sig=250,4 Ref=off (JH/JH-1-168\_AD-H 2021-04-15 17-24-591FC-0101.D)

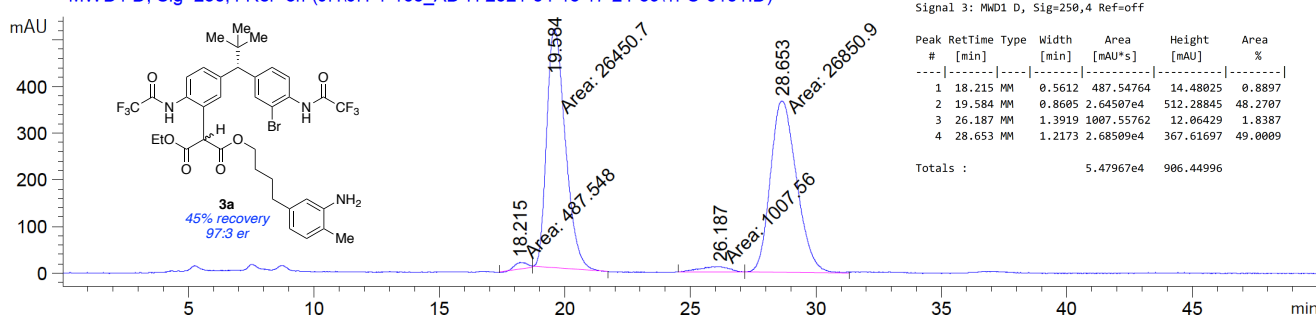

**HPLC Conditions:** Chiralpak® IB column, 55% MeCN/H<sub>2</sub>O eluent with 0.5% formic acid buffer, 1.25 mL min<sup>-1</sup> flow rate, 25 °C, 265 nm. See SI section 12.1 for racemic standard.

DAD1 B, Sig=265,4 Ref=360,100 (JH/JH-I-168 2021-04-15 17-04-371035-0201.D)

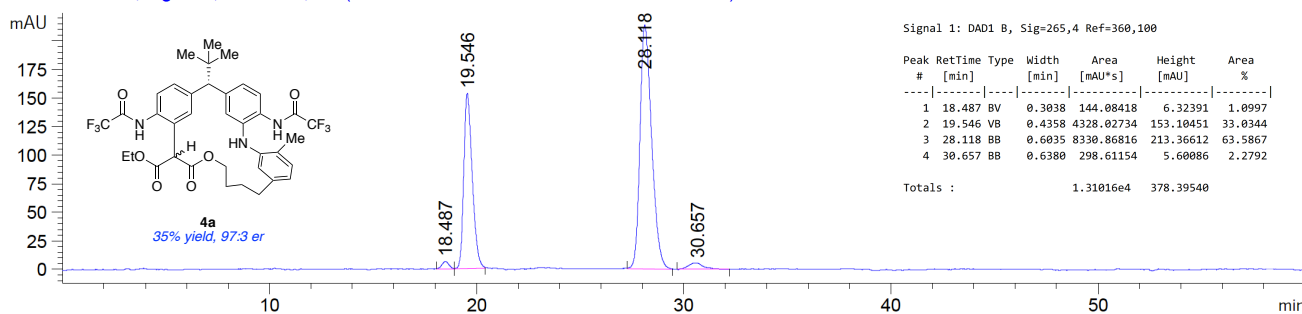

DAD1 B, Sig=265,4 Ref=360,100 (JH/JH-I-168 2021-04-15 17-04-371034-0101.D)

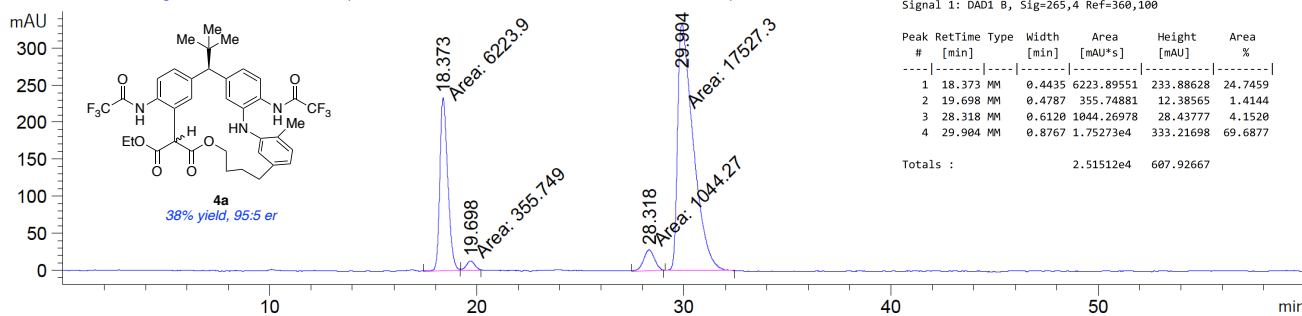

## 12. Characterization and Spectra of Macrocyclic Products (4a-4f, 5f)

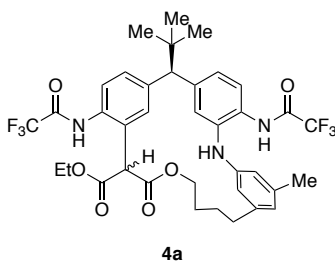

**Ethyl (4*R*)-4-(*tert*-butyl)-1<sup>5</sup>-methyl-7-oxo-3<sup>6</sup>,5<sup>4</sup>-bis(2,2,2-trifluoroacetamido)-8-oxa-2-aza-1,3,5(1,3)-tribenzenacyclododecaphane-6-carboxylate (4a)** was synthesized from **3a** following **Procedure 8**. Crude material was purified by silica chromatography (0→20→85% EtOAc/Hex) to yield the desired product as a white solid. **4a** is observed as a 1.7:1 mixture of diastereomers CD<sub>2</sub>Cl<sub>2</sub> at 25 °C by <sup>1</sup>H NMR.

**Yield:** 67% (0.0740 g) using *ent*-L2

**TLC** (30% EtOAc/Hex): R<sub>f</sub> = 0.86, 0.81.

**IR** (FT-ATR, cm<sup>-1</sup>, neat): ν<sub>max</sub> 3245, 2964, 2254, 1723, 1533, 1402, 1285, 1159, 904, 723.

**<sup>1</sup>H NMR** (500 MHz, CD<sub>2</sub>Cl<sub>2</sub>): **major diastereomer:** δ 10.29 (s, 1H), 8.71 (s, 1H), 8.06 (d, *J* = 8.5 Hz, 1H), 7.75 – 7.64 (m, 2H)\*, 7.47 (dd, *J* = 8.5, 2.0 Hz, 1H), 7.17 (d, *J* = 1.8 Hz, 1H), 7.07 (d, *J* = 1.6 Hz, 1H), 7.06 – 7.00 (m, 1H)\*, 6.58 (dd, *J* = 7.5, 1.3 Hz, 1H)\*, 5.95 (s, 1H)\*, 5.09 (s, 1H), 4.59 (s, 1H), 4.32 – 4.12 (m, 3H)\*, 4.01 – 3.93 (m, 1H), 3.81 (s, 1H), 3.70 (s, 1H), 2.32 – 2.18 (s + m, 5H)\*, 1.59 – 1.38 (m, 2H)\*, 1.28 (t, *J* = 7.1 Hz, 3H), 1.19 – 1.09 (m, 2H)\*, 1.06 (s, 9H)\*; **minor diastereomer:** δ 10.08 (s, 1H), 8.55 (s, 1H), 8.15 (d, *J* = 8.5 Hz, 1H), 7.75 – 7.64 (m, 1H)\*, 7.52 (dd, *J* = 8.5, 1.8 Hz, 1H), 7.38 (dd, *J* = 8.3, 2.0 Hz, 1H), 7.26 (d, *J* = 1.7 Hz, 1H), 7.21 (d, *J* = 1.8 Hz, 1H), 7.06 – 7.00 (m, 1H)\*, 6.58 (dd, *J* = 7.5, 1.3 Hz, 1H)\*, 5.95 (s, 1H)\*, 5.13 (s, 1H), 4.61 (s, 1H), 4.32 – 4.12 (m, 3H)\*, 4.11 – 4.02 (m, 1H), 3.81 (s, 1H), 2.32 – 2.18 (s + m, 5H)\*, 1.59 – 1.38 (m, 2H)\*, 1.23 (t, *J* = 7.1 Hz, 3H), 1.19 – 1.09 (m, 2H)\*, 1.06 (brs, 9H)\*. (\* Indicates overlap of peaks corresponding to the major and minor diastereomers.)

**<sup>13</sup>C NMR** (151 MHz, CD<sub>2</sub>Cl<sub>2</sub>): **major diastereomer:** δ 169.8, 169.1, 155.9–154.6 (m, overlapping quartets of C=O(CF<sub>3</sub>)), 144.1, 142.5, 142.3, 141.8, 135.4, 134.0, 132.6, 130.8, 130.0, 129.1\*, 128.9, 127.0, 126.5, 125.7, 122.8 (q, *J* = 288.4 Hz), 116.1 (q, *J* = 288.4 Hz), 122.6, 121.6, 121.1, 114.1, 66.7, 63.4, 63.2, 57.8, 35.8, 35.4, 29.4, 28.7, 28.6, 17.3\*, 14.1; **minor diastereomer\*\*:** δ 169.2, 169.2, 155.9–154.6 (m, overlapping quartets of C=O(CF<sub>3</sub>)), 143.9, 142.7, 142.0, 141.7, 133.6, 132.5, 132.2, 130.8, 130.6, 129.1\*, 128.5, 127.8, 126.5, 125.4, 122.7, 121.6, 121.4, 113.8, 66.2, 63.5, 63.2, 57.5, 35.2, 35.1, 29.4, 28.1, 28.0, 17.3\*, 14.0. (Note: \* indicates overlap of peaks corresponding multiple peaks; \*\* peaks corresponding to (C=O)CF<sub>3</sub> for the minor diastereomer were not observed at the signal-to-noise ratio of the measurement.)

**<sup>19</sup>F NMR** (471 MHz, CD<sub>2</sub>Cl<sub>2</sub>): δ -76.17, -76.52, -76.52, -76.54.

**HRMS:** Exact mass calculated for [C<sub>37</sub>H<sub>39</sub>F<sub>6</sub>N<sub>3</sub>O<sub>6</sub> + H]<sup>+</sup> requires *m/z* = 736.2816, found *m/z* = 736.2832.

**Optical Rotation:** α<sub>D</sub><sup>20</sup> = + 69.5 ° (*c* = 0.5, MeOH, >99:1 er)

**HPLC** (Chiralpak® IB column, 55% MeCN/H<sub>2</sub>O eluent with 0.5% formic acid buffer, 1.25 mL min<sup>-1</sup> flow rate, 25 °C, 265 nm, observed as 1.9:1 dr): major diastereomers  $t_R$  = 20.8 min, 34.4 min; minor diastereomers  $t_R$  = 22.5 min, 32.7 min.

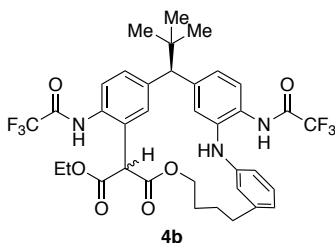

**Ethyl (4R)-4-(tert-butyl)-7-oxo-3,5-bis(2,2,2-trifluoroacetamido)-8-oxa-2-aza-1,3,5(1,3)-tribenzenacyclododecaphane-6-carboxylate (4b)** was synthesized from **3b** following **Procedure 8**. Crude material was purified by silica chromatography (0→25→75% EtOAc/Hex) to yield the desired product as a white solid. **4b** is observed as a 2.5:1 mixture of diastereomers CD<sub>2</sub>Cl<sub>2</sub> at 25 °C by <sup>1</sup>H NMR.

**Yield:** 50% (0.0536 g) using *ent-L2*

**TLC** (30% EtOAc/Hex):  $R_f$  = 0.80.

**IR** (FT-ATR, cm<sup>-1</sup>, neat):  $\nu_{\max}$  3331, 2952, 2867, 2119, 1717, 1501 1532, 1283, 1196, 1152, 906, 727.

**<sup>1</sup>H NMR** (500 MHz, CD<sub>2</sub>Cl<sub>2</sub>): **major diastereomer:**  $\delta$  10.29 (s, 1H), 8.75 (s, 1H), 8.09 (d,  $J$  = 8.5 Hz, 1H), 7.72 (d,  $J$  = 8.5 Hz, 1H), 7.69 – 7.62 (m, 1H)\*, 7.49 (dd,  $J$  = 8.5, 1.8 Hz, 1H), 7.24 – 7.19 (m, 1H)\*, 7.17 – 7.12 (m, 1H)\*, 7.07 (d,  $J$  = 1.9 Hz, 1H), 6.80 – 6.75 (m, 1H)\*, 6.70 – 6.64 (m, 1H)\*, 6.04 (s, 1H), 5.23 (s, 1H), 4.60 (s, 1H), 4.32 – 4.13 (m, 3H)\*, 3.97 (ddd,  $J$  = 11.0, 7.2, 4.0 Hz, 1H), 3.69 (s, 1H), 2.39 – 2.19 (m, 2H)\*, 1.52 – 1.41 (m, 2H)\*, 1.28 (t,  $J$  = 7.1 Hz, 3H), 1.20 – 1.11 (m, 2H)\*, 1.05 (s, 9H); **minor diastereomer:**  $\delta$  10.05 (s, 1H), 8.67 (s, 1H), 8.17 (d,  $J$  = 8.5 Hz, 1H), 7.69 – 7.62 (m, 1H)\*, 7.52 (dd,  $J$  = 8.5, 1.8 Hz, 1H), 7.38 (dd,  $J$  = 8.3, 1.9 Hz, 1H), 7.27 (d,  $J$  = 1.8 Hz, 1H), 7.24 – 7.19 (m, 1H)\*, 7.17 – 7.12 (m, 1H)\*, 6.80 – 6.75 (m, 1H)\*, 6.70 – 6.64 (m, 1H)\*, 6.01 (s, 1H), 5.33 (s, 1H), 4.61 (s, 1H), 4.32 – 4.13 (m, 3H)\*, 4.10 – 4.01 (m, 1H), 3.80 (s, 1H), 2.39 – 2.19 (m, 2H)\*, 1.52 – 1.41 (m, 2H)\*, 1.24 (t,  $J$  = 7.1 Hz, 3H), 1.20 – 1.11 (m, 2H)\*, 1.05 (s, 9H). (Note: \* indicates overlap of peaks corresponding to the major and minor diastereomers.)

**<sup>13</sup>C NMR** (151 MHz, CD<sub>2</sub>Cl<sub>2</sub>) **major diastereomer:**  $\delta$  169.7, 169.1, 155.5 (q,  $J$  = 64.9 Hz), 155.2 (q,  $J$  = 64.9 Hz), 146.1, 144.3, 142.5, 135.3, 133.9, 132.6, 132.5, 130.2, 129.6,\* 129.2, 128.5, 126.9, 126.4, 125.6, 121.5, 121.4, 116.4 (q,  $J$  = 288.4 Hz), 116.1 (q,  $J$  = 288.4 Hz), 115.4, 114.5, 66.7, 63.5, 63.4, 57.8, 35.9, 35.4, 29.4\*, 28.6, 28.2, 14.0; **minor diastereomer\*\*:** 169.2, 169.1, 146.0, 144.3, 142.4, 142.2, 142.1, 133.5, 132.5, 132.1, 130.8, 129.6\*, 128.5, 127.8, 126.5, 125.4, 121.7, 121.3, 115.2, 114.2, 66.3, 63.2, 63.1, 57.4, 35.4, 35.2, 29.4\*, 28.0, 28.0, 14.0. (Note: \* indicates overlap of peaks corresponding multiple peaks; \*\* peaks corresponding to (C=O)CF<sub>3</sub> for the minor diastereomer were not observed at the signal-to-noise ratio of the measurement.)

**<sup>19</sup>F NMR** (471 MHz, CD<sub>2</sub>Cl<sub>2</sub>)  $\delta$  -76.09, -76.36, -76.51, -76.53.

**HRMS:** Exact mass calculated for [C<sub>36</sub>H<sub>37</sub>F<sub>6</sub>N<sub>3</sub>O<sub>6</sub> + H]<sup>+</sup> requires  $m/z$  = 722.2659, found  $m/z$  = 736.2661.

**Optical:**  $\alpha_D^{20} = +69.9^\circ$  ( $c = 0.5$ , MeOH, >99:1 er)

**HPLC** (Chiralpak® IB connected to Chiralpak® IC column, 55% MeCN/H<sub>2</sub>O eluent with 0.5% formic acid buffer, 1.25 mL min<sup>-1</sup> flow rate, 25 °C, 265 nm, observed as 1.1:1 dr): major diastereomers  $t_R = 22.3$  min, 34.9 min; minor diastereomers  $t_R = 23.3$  min, 33.7 min.

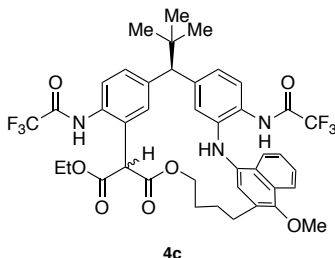

**Ethyl (4*R*)-4-(*tert*-butyl)-1<sup>4</sup>-methoxy-7-oxo-3<sup>6</sup>,5<sup>4</sup>-bis(2,2,2-trifluoroacetamido)-8-oxa-2-aza-1(1,3)-naphthalena-3,5(1,3)-dibenzenacyclododecaphane-6-carboxylate (4c)** was synthesized from **3c** following **Procedure 8**. Crude material was purified by silica chromatography (0→25→80% EtOAc/Hex) to yield the desired product as a beige solid. **4c** is observed as a 2.1:1 mixture of diastereomers in CD<sub>2</sub>Cl<sub>2</sub> at 25 °C by <sup>1</sup>H NMR.

**Yield:** 57% (0.0687 g) using *ent*-**L2**

**TLC** (30% EtOAc/Hex):  $R_f = 0.63, 0.66$ .

**IR** (FT-ATR, cm<sup>-1</sup>, neat):  $\nu_{\max}$  3277, 2953, 2870, 2089, 1717, 1597, 1532, 1387, 1282, 1151, 1032, 906, 752.

**<sup>1</sup>H NMR** (500 MHz, CD<sub>2</sub>Cl<sub>2</sub>): major diastereomer:  $\delta$  10.27 (s, 1H), 8.67 (s, 1H), 8.21 – 8.05 (m, 2H)\*, 8.04 (d,  $J = 8.5$  Hz, 1H), 7.73 – 7.64 (m, 2H)\*, 7.61 – 7.47 (m, 2H)\*, 7.44 (d,  $J = 8.4$  Hz, 1H), 7.16 (s, 1H), 7.07 (s, 1H), 6.09 (s, 1H), 5.73 (s, 1H), 5.71 (s, 1H), 4.60 (s, 1H), 4.34 – 4.13 (m, 3H)\*, 4.07 – 3.98 (m, 1H), 3.84 (s, 3H), 3.71 (s, 1H), 2.69 – 2.39 (m, 2H)\*, 1.64 – 1.49 (m, 2H)\*, 1.36 – 1.15 (m, 5H)\*, 1.05 (s, 9H); minor diastereomer: 10.12 (s, 1H), 8.45 (s, 1H), 8.21 – 8.05 (m, 3H)\*, 7.73 – 7.64 (m, 1H)\*, 7.61 – 7.47 (m, 3H)\*, 7.38 (dd,  $J = 8.2, 1.7$  Hz, 1H), 7.31 (s, 1H), 7.25 (s, 1H), 6.11 (s, 1H), 4.62 (s, 1H), 4.34 – 4.13 (m, 3H)\*, 4.09 (dt,  $J = 9.5, 4.3$  Hz, 1H), 3.82 (s, 1H), 3.81 (s, 3H), 2.69 – 2.39 (m, 2H)\*, 1.64 – 1.49 (m, 2H)\*, 1.36 – 1.15 (m, 5H)\*, 1.06 (s, 9H). (Note: \* indicates overlap of peaks corresponding to the major and minor diastereomers.)

**<sup>13</sup>C NMR** (126 MHz, CD<sub>2</sub>Cl<sub>2</sub>): major diastereomer:  $\delta$  169.9, 169.1, 156.0–154.9 (m, overlapping quartets for ((C=O)CF<sub>3</sub>), 148.4, 142.6, 137.5, 135.4, 134.9, 132.6, 131.0, 129.1–129.0\*, 127.8, 126.8–126.7\*, 126.6, 125.8, 125.7, 123.1, 122.0, 121.1, 116.4 (q,  $J = 289.8$  Hz), 116.1 (q,  $J = 288.9$  Hz), 113.6, 66.8, 63.5, 63.4, 62.4, 57.8, 35.3, 29.7, 29.4, 29.1, 27.4, 14.1; **minor diastereomer\*\***:  $\delta$  169.3, 169.2, 156.0–154.9 (overlapping multiplets for ((C=O)CF<sub>3</sub>), 148.7, 142.91, 142.1, 137.2, 134.3, 132.3, 130.7, 129.6, 129.1–129.0\*, 127.6, 127.4, 126.8–126.7\*, 126.5, 125.9, 125.9, 125.4, 123.2, 121.9, 121.2, 113.2, 66.3, 63.2, 63.2, 62.4, 57.6, 35.3, 29.4, 28.5, 28.5, 27.2, 14.0. (Note: \* indicates numerous peaks corresponding to major or minor diastereomers. See page S110 for the spectra.) \*\*Peaks of (C=O)CF<sub>3</sub> for the minor diastereomer were not observed at the signal-to-noise ratio of the measurement.)

**<sup>19</sup>F NMR** (471 MHz, CD<sub>2</sub>Cl<sub>2</sub>)  $\delta$  -76.22, -76.52, -76.53, -76.67.

**HRMS:** Exact mass calculated for [C<sub>41</sub>H<sub>41</sub>F<sub>6</sub>N<sub>3</sub>O<sub>7</sub> + H]<sup>+</sup> requires  $m/z = 802.2921$ , found  $m/z = 802.2922$ .

**Optical Rotation:**  $\alpha_D^{20} = +50.7^\circ$  ( $c = 0.5$ , MeOH, 99:1 er)

**HPLC** (Chiralpak® IB column, 55% MeCN/H<sub>2</sub>O eluent with 0.5% formic acid buffer, 1.25 mL min<sup>-1</sup> flow rate, 25 °C, 265 nm, observed as 1.4:1 dr): major enantiomers  $t_R = 50.4$  min, 91.3 min; minor enantiomers  $t_R = 52.8$  min, 81.8 min. (Note: Retention times are prone to change due to prolonged run time. Order of elution of diastereomers remains consistent.)

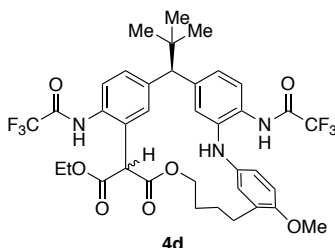

**Ethyl (4R)-4-(tert-butyl)-1<sup>4</sup>-methoxy-7-oxo-3<sup>6</sup>,5<sup>4</sup>-bis(2,2,2-trifluoroacetamido)-8-oxa-2-aza-1,3,5(1,3)-tribenzenacyclododecaphane-6-carboxylate (4d)** was synthesized from **3d** following **Procedure 8**. Crude material was purified by silica chromatography (0→30→85% EtOAc/Hex) to yield the desired product as a light pink solid. **4d** is observed as a 2.8:1 mixture of diastereomers CD<sub>2</sub>Cl<sub>2</sub> at 25 °C by <sup>1</sup>H NMR.

**Yield:** 49% (0.0553 g) using *ent*-L2.

**TLC** (30% EtOAc/Hex):  $R_f = 0.71$ .

**IR** (FT-ATR, cm<sup>-1</sup>, neat):  $\nu_{\max}$  3321, 2953, 2115, 1717, 1597, 1533, 1500, 1282, 1220, 1152, 1032, 906, 750, 667.

**<sup>1</sup>H NMR** (500 MHz, CD<sub>2</sub>Cl<sub>2</sub>) **major diastereomer:**  $\delta$  10.29 (s, 1H), 8.60 (s, 1H), 7.92 (d,  $J = 8.4$  Hz, 1H), 7.73 (d,  $J = 8.4$  Hz, 1H), 7.68 – 7.60 (m, 1H)\*, 7.48 – 7.35 (m, 1H)\*, 7.09 (s, 1H), 7.06 (s, 1H), 6.79 (brs, 2H)\*, 6.24 (s, 1H), 5.10 (s, 1H), 4.61 (s, 1H), 4.33 – 4.18 (m, 3H)\*, 4.07 – 3.95 (m, 1H)\*, 3.78 (s, 3H), 3.64 (s, 1H), 2.54 – 2.43 (m, 1H), 2.32 – 2.21 (m, 1H), 1.64 – 1.46 (m, 2H),\* 1.29 – 1.11 (m, 5H),\* 1.04 (s, 9H)\*; **minor diastereomer:** 9.87 (s, 1H), 8.62 (s, 1H), 8.02 (d,  $J = 8.4$  Hz, 1H), 7.68 – 7.60 (m, 1H)\*, 7.48 – 7.35 (m, 2H)\*, 7.24 (s, 1H), 7.16 (s, 1H), 6.79 (brs, 2H)\*, 6.19 (s, 1H), 5.12 (s, 1H), 4.62 (s, 1H), 4.33 – 4.18 (m, 3H)\*, 4.07 – 3.95 (m, 1H)\*, 3.76 (s, 3H), 3.75 (s, 1H), 2.39 (t,  $J = 7.6$  Hz, 2H), 1.64 – 1.46 (m, 2H),\* 1.29 – 1.11 (m, 5H),\* 1.04 (s, 9H)\*. (Note: \* indicates overlap of peaks corresponding to major and minor diastereomers)

**<sup>13</sup>C NMR** (126 MHz, CD<sub>2</sub>Cl<sub>2</sub>) **major diastereomer:**  $\delta$  169.5, 169.2, 156.0–154.9 (m, overlapping quartets), 153.0, 142.6\*, 142.4, 138.0, 136.4, 135.3, 132.6, 132.6, 132.2, 129.3, 126.2, 126.0, 125.7, 124.8, 122.4, 118.3, 117.4, 116.4 (q,  $J = 283.5$  Hz), 116.3 (q,  $J = 284.8$  Hz), 111.7, 66.7, 63.7, 63.3, 57.9, 56.1, 35.4, 30.0, 29.4, 29.0, 25.9, 14.1\*; **minor diastereomer\*\*:**  $\delta$  169.0, 169.9, 153.0, 142.6\*, 142.3, 138.3, 135.9, 132.4, 132.0, 131.8, 128.8, 127.7, 126.6, 126.4, 126.2, 125.4, 121.8, 118.7, 117.3, 111.9, 66.4, 63.3, 63.1, 56.9, 56.1, 35.3, 29.4\*, 28.8, 28.1, 26.0, 14.1\* (Note: \*Indicates overlapping peaks of two diastereomers; \*\*Peaks of (C=O)CF<sub>3</sub>, (C=O)CF<sub>3</sub> for the minor diastereomer were not observed at the signal-to-noise ratio of the measurement).

**<sup>19</sup>F NMR** (471 MHz, CD<sub>2</sub>Cl<sub>2</sub>)  $\delta$  -75.95, -76.20, -76.46, -76.54.

**HRMS:** Exact mass calculated for [C<sub>37</sub>H<sub>39</sub>F<sub>6</sub>N<sub>3</sub>O<sub>7</sub> + H]<sup>+</sup> requires  $m/z = 752.2770$ , found  $m/z = 752.2774$ .

**Optical Rotation:**  $\alpha_D^{20} = +64.4^\circ$  ( $c = 0.5$ , MeOH, 98:2 er)

**HPLC** (Chiralpak® IB column, 50% MeCN/H<sub>2</sub>O eluent with 0.5% formic acid buffer, 1.00 mL min<sup>-1</sup> flow rate, 25 °C, 265 nm, observed as 3.0:1 dr): major enantiomer *t<sub>R</sub>* = 17.2 min; minor enantiomer *t<sub>R</sub>* = 15.4 min. Unresolved pair of major and minor enantiomers *t<sub>R</sub>* = 11.7 min.

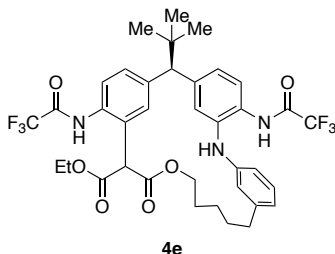

**Ethyl (4*R*)-4-(tert-butyl)-7-oxo-3<sup>6</sup>,5<sup>4</sup>-bis(2,2,2-trifluoroacetamido)-8-oxa-2-aza-1,3,5(1,3)-tribenzenacyclotridecaphane-6-carboxylate (4e)** was synthesized from **3e** following **Procedure 8**. Crude material was purified by silica chromatography (0→25→80% EtOAc/Hex) to yield **4e** as a beige solid. **4e** is observed as a 1.9:1 mixture of diastereomers in CD<sub>2</sub>Cl<sub>2</sub> at 25 °C by <sup>1</sup>H NMR.

**Yield:** 23% (0.0254 g)

**TLC** (30% EtOAc/Hex): *R<sub>f</sub>* = 0.76.

**IR** (FT-ATR, cm<sup>-1</sup>, neat): *v*<sub>max</sub> 3324, 2945, 2863, 2125, 1715, 1590, 1531, 1284, 1153, 1026, 907, 732.

**<sup>1</sup>H NMR** (600 MHz, CD<sub>2</sub>Cl<sub>2</sub>): **major diastereomer:** δ 10.37 (s, 1H), 8.45 (s, 1H), 7.97 (d, *J* = 8.3 Hz, 1H), 7.66 (d, *J* = 8.2 Hz, 1H), 7.44 (s, 1H), 7.31 – 7.28 (m, 2H), 7.24 – 7.15 (m, 2H)\*, 6.81 – 6.72 (m, 2H)\*, 6.37 (s, 1H), 5.42 (s, 1H), 4.52 (s, 1H), 4.27 – 4.11 (m, 4H), 3.81 (s, 1H), 2.61 (dt, *J* = 12.6, 6.1 Hz, 1H), 2.47 – 2.35 (m, 1H)\*, 1.63 – 1.37 (m, 4H)\*, 1.29 – 1.08 (m, 5H)\*, 1.03 (s, 9H); **minor diastereomer:** 10.21 (s, 1H), 8.54 (s, 1H), 7.93 (d, *J* = 8.5 Hz, 1H), 7.75 (d, *J* = 8.4 Hz, 1H), 7.57 (d, *J* = 7.0 Hz, 1H), 7.36 (d, *J* = 8.2 Hz, 1H), 7.24 – 7.15 (m, 2H)\*, 7.07 (s, 1H), 6.81 – 6.72 (m, 2H)\*, 6.35 (s, 1H), 5.33 (s, 1H), 4.56 (s, 1H), 4.27 – 4.11 (m, 3H)\*, 4.04 (ddd, *J* = 10.7, 6.9, 3.5 Hz, 1H), 3.70 (s, 1H), 2.51 (dt, *J* = 13.9, 7.0 Hz, 1H), 2.47 – 2.35 (m, 1H)\*, 1.63 – 1.37 (m, 4H)\*, 1.25 (t, *J* = 7.1 Hz, 3H), 1.29 – 1.08 (m, 5H)\*, 1.04 (s, 9H). (Note: \* indicates overlap of peaks corresponding to major and minor diastereomers)

**<sup>13</sup>C NMR** (151 MHz, CD<sub>2</sub>Cl<sub>2</sub>): **major diastereomer:** δ 170.3, 168.4, 156.1–154.8 (m, overlapping quartets of (C=O)CF<sub>3</sub>), 144.6, 144.3, 142.0, 141.8, 134.0, 132.8–132.6\*, 132.1, 129.7, 129.6, 129.0, 128.5, 126.4–125.3\*, 124.6, 122.0, 121.6, 116.5, 116.4 (q, *J* = 288.4 Hz), 116.1 (q, *J* = 288.4 Hz), 114.5, 67.6, 63.2, 63.1, 58.1, 36.0, 35.5, 30.7, 29.3, 28.5, 25.6, 14.0; **minor diastereomer\*\*:** δ 169.4, 169.3, 156.1–154.8 (m, overlapping quartets), 144.8, 144.3, 142.5, 142.3, 135.5, 134.8, 132.8–132.6\*, 128.0, 126.4–125.3\*, 122.3, 122.1, 117.0, 116.6, 67.4, 63.3, 63.2, 57.7, 36.1, 35.3, 30.3, 29.4, 28.3, 26.1, 14.0. (Note: \* indicates numerous peaks corresponding to major or minor diastereomers. See page S116 for the spectra; \*\*peaks of (C=O)CF<sub>3</sub> for the minor diastereomer were not observed at the signal-to-noise ratio of the measurement.)

**<sup>19</sup>F NMR** (471 MHz, CD<sub>2</sub>Cl<sub>2</sub>) δ -76.08, -76.28, -76.54.

**HRMS:** Exact mass calculated for [C<sub>37</sub>H<sub>39</sub>F<sub>6</sub>N<sub>3</sub>O<sub>6</sub> + H]<sup>+</sup> requires *m/z* = 736.2821, found *m/z* = 736.2823.

**Optical Rotation:**  $\alpha_D^{20} = +9.8^\circ$  ( $c = 0.5$ , MeOH, 99:1 er)

**HPLC:** (Chiralpak® IB column, 55% MeCN/H<sub>2</sub>O eluent, 1.00 mL min<sup>-1</sup> flow rate, 25 °C, 265 nm, observed as 2.1:1 dr): major enantiomers  $t_R = 25.6$  min, 31.9 min; minor enantiomers  $t_R = 33.5$  min, 35.9 min.

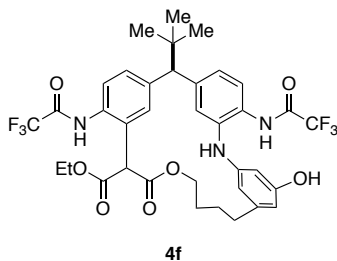

**Ethyl (4R)-4-(tert-butyl)-1<sup>5</sup>-hydroxy-7-oxo-3<sup>6</sup>,5<sup>4</sup>-bis(2,2,2-trifluoroacetamido)-8-oxa-2-aza-1,3,5(1,3)-tribenzenacyclododecaphane-6-carboxylate (4f)** was synthesized from **3f** following **Procedure 8**. Crude material was purified by silica chromatography (0→25→80% EtOAc/Hex) to yield **4f** as an off-white solid. **4f** is observed as a 2.5:1 mixture of diastereomers in CD<sub>2</sub>Cl<sub>2</sub> at 25 °C by <sup>1</sup>H NMR.

**Yield:** 43% (0.0477 g) using *ent*-L2

**TLC** (30% EtOAc/Hex):  $R_f = 0.33$ .

**IR** (FT-ATR, cm<sup>-1</sup>, neat):  $\nu_{\max}$  3344, 3021, 2953, 2868, 2118, 1715, 1597, 1533, 1282, 1215, 1153, 1028, 836, 750.

**<sup>1</sup>H NMR** (600 MHz, CD<sub>2</sub>Cl<sub>2</sub>): **major diastereomer:**  $\delta$  10.29 (s, 1H), 8.69 (s, 1H), 8.08 (d,  $J = 8.5$  Hz, 1H), 7.72 (d,  $J = 8.5$  Hz, 1H), 7.69 – 7.63 (m, 1H)\*, 7.47 (d,  $J = 8.5$  Hz, 1H), 7.20 (s, 1H)\*, 7.07 (s, 1H), 6.25 (s, 1H)\*, 6.13 (s, 1H)\*, 5.57 (s, 1H)\*, 5.17 (s, 1H), 5.00 (s, 1H)\*, 4.59 (s, 1H), 4.35 – 4.12 (m, 3H)\*, 3.96 (ddd,  $J = 11.0, 7.3, 3.9$  Hz, 2H), 3.69 (s, 1H), 2.29 – 2.17 (m, 2H)\*, 1.53 – 1.36 (m, 2H)\*, 1.28 (t,  $J = 7.1$  Hz, 3H), 1.18 – 1.07 (m, 2H)\*, 1.04 (s, 9H)\*; **minor diastereomer:**  $\delta$  10.06 (s, 1H), 8.62 (s, 1H), 8.16 (d,  $J = 8.5$  Hz, 1H), 7.69 – 7.63 (m, 1H)\*, 7.51 (d,  $J = 8.5$  Hz, 1H), 7.37 (d,  $J = 8.3$  Hz, 1H), 7.27 (s, 1H), 7.20 (s, 1H)\*, 6.25 (s, 1H)\*, 6.13 (s, 1H)\*, 5.57 (s, 1H)\*, 5.26 (s, 1H), 5.00 (s, 1H)\*, 4.61 (s, 1H), 4.35 – 4.12 (m, 3H)\*, 4.03 (dt,  $J = 10.8, 5.2$  Hz, 1H), 3.80 (s, 1H), 2.29 – 2.17 (m, 2H)\*, 1.53 – 1.36 (m, 2H)\*, 1.23 (t,  $J = 7.2$  Hz, 3H), 1.18 – 1.07 (m, 2H)\*, 1.04 (s, 9H)\*. (Note: \*indicates overlap of major and minor diastereomers)

**<sup>13</sup>C NMR** (151 MHz, CD<sub>2</sub>Cl<sub>2</sub>): **major diastereomer:**  $\delta$  169.8, 169.1, 157.2\*, 156.2–154.7 (m, overlapping quartets of (C=O)CF<sub>3</sub>), 147.5, 145.7, 142.5, 142.1, 135.3, 133.7, 132.5, 130.2, 129.2, 128.9, 127.1, 126.4, 125.6, 121.5, 116.4 (q,  $J = 288.41$  Hz), 116.1 (q,  $J = 289.92$  Hz), 108.4, 107.0, 102.2, 66.6, 63.5, 63.4, 57.8, 35.9, 35.3, 29.4\*, 28.6, 27.9, 14.0; **minor diastereomer\*\*:**  $\delta$  169.3, 169.2, 157.2\*, 147.4, 145.7, 142.4, 142.2, 133.3, 132.6, 132.4, 132.2, 130.9, 128.8, 128.0, 126.5, 125.4, 121.3, 108.9, 106.6, 101.7, 66.3, 63.3, 63.1, 57.4, 35.4, 35.2, 29.4\*, 28.0, 27.8, 14.0. (Note: \*indicates overlapping peaks of major and minor diastereomers; \*\*peaks of (C=O)CF<sub>3</sub>, (C=O)CF<sub>3</sub> for the minor diastereomer were not observed at the signal-to-noise ratio of the measurement).

**<sup>19</sup>F NMR** (471 MHz, CD<sub>2</sub>Cl<sub>2</sub>)  $\delta$  -76.11, -76.37, -76.51, -76.54.

**HRMS:** Exact mass calculated for [C<sub>36</sub>H<sub>37</sub>F<sub>6</sub>N<sub>3</sub>O<sub>7</sub> + H]<sup>+</sup> requires  $m/z = 738.2608$ , found  $m/z = 738.2599$ .

**Optical Rotation:**  $\alpha_D^{20} = +91.0^\circ$  ( $c = 0.5$ , MeOH, >99:1 er)

**HPLC** (Chiralpak® IB column, 55% MeCN/H<sub>2</sub>O eluent with 0.5% formic acid buffer, 1.20 mL min<sup>-1</sup> flow rate, 25 °C, 265 nm, observed as 1.8:1 dr): major enantiomer  $t_R$  = 8.4 min; minor enantiomer  $t_R$  = 8.9 min. Unresolved pair of major and minor enantiomers  $t_R$  = 14.7 min.

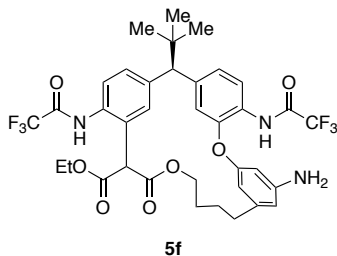

**Ethyl (4*R*)-1<sup>5</sup>-amino-4-(*tert*-butyl)-7-oxo-3<sup>6</sup>,5<sup>4</sup>-bis(2,2,2-trifluoroacetamido)-2,8-dioxa-1,3,5(1,3)-tribenzenacyclododecaphane-6-carboxylate (5f)** was synthesized from **3f** following **Procedure 8**. Crude material was purified by silica chromatography (0→45→80% EtOAc/Hex eluent) to yield the desired product **5f** as a white solid. **5f** is observed as a 4.3:1 mixture of diastereomers CD<sub>2</sub>Cl<sub>2</sub> at 25 °C by <sup>1</sup>H NMR.

**Yield:** 11% (0.0126 g) with **L3**

**TLC** (40% EtOAc/Hex):  $R_f$  = 0.53.

**IR** (FT-ATR, cm<sup>-1</sup>, neat):  $\nu_{\max}$  3389, 3288, 2953, 2868, 2126, 1727, 1590, 1535, 1289, 1159, 1030, 835.

**<sup>1</sup>H NMR** (500 MHz, CD<sub>2</sub>Cl<sub>2</sub>): **major diastereomer:**  $\delta$  10.28 (s, 1H), 8.43 (s, 1H), 8.30 (d,  $J$  = 8.5 Hz, 1H), 7.72 (d,  $J$  = 8.5 Hz, 1H), 7.60 (d,  $J$  = 8.5 Hz, 1H), 7.42–7.40 (m, 1H)\*, 7.30 (s, 1H), 7.06 (s, 1H)\*, 6.90 (s, 1H), 6.39 (s, 1H), 6.24 (s, 1H), 4.60 (s, 1H), 4.34–4.17 (m, 3H)\*, 3.96 (ddd,  $J$  = 11.1, 7.3, 3.9 Hz, 1H), 3.82 (brs, 2H), 3.66 (s, 1H), 2.29–2.23 (m, 2H)\*, 1.52–1.45 (m, 2H)\*, 1.29 (t,  $J$  = 7.1 Hz, 3H), 1.17–1.10 (m, 2H)\*, 1.04 (s, 9H); **minor diastereomer:** 9.87 (s, 1H), 8.36 (s, 1H), 8.28 (d,  $J$  = 8.6 Hz, 1H), 7.65 (d,  $J$  = 8.3 Hz, 1H), 7.42–7.40 (m, 1H)\*, 7.37 (d,  $J$  = 8.4 Hz, 1H), 7.06 (s, 1H)\*, 6.36 (s, 1H), 6.23 (s, 1H), 4.65 (s, 1H), 4.34–4.17 (m, 3H)\*, 4.07–4.02 (m, 1H), 3.82 (brs, 2H), 3.77 (s, 1H), 2.34–2.31 (m, 1H), 2.29–2.23 (m, 1H)\*, 1.52–1.45 (m, 2H)\*, 1.25 (t,  $J$  = 7.1 Hz, 3H), 1.17–1.10 (m, 2H)\*, 1.03 (s, 9H). (\*indicates overlap of peaks corresponding to the major and minor diastereomers.)

**<sup>13</sup>C NMR** (126 MHz, CD<sub>2</sub>Cl<sub>2</sub>): **major diastereomer:**  $\delta$  169.8, 168.9, 158.2, 155.5 (q,  $J$  = 36.5 Hz), 154.7 (q,  $J$  = 36.5 Hz), 148.8, 146.0, 145.8, 142.3, 141.6, 135.2\*, 132.6, 129.3, 126.3, 125.1, 125.6, 124.9, 121.5, 120.8, 116.4 (q,  $J$  = 287.9 Hz), 116.1 (q,  $J$  = 288.5 Hz), 111.1, 105.7, 103.2, 66.4, 63.5, 63.4, 57.8, 35.7, 35.4, 29.4, 28.6, 27.7, 14.1\*; **minor diastereomer\*\*:**  $\delta$  169.3, 168.8, 158.3, 148.9, 145.7, 142.2, 142.0, 135.2\*, 132.4, 132.1, 132.0, 126.7, 126.5, 126.0, 125.5, 121.7, 121.1, 111.5, 105.6, 102.5, 66.1, 63.3, 63.2, 56.9, 35.3, 35.3, 29.3, 27.8, 27.4, 14.1\*.

(Note: \*indicates a peak corresponding to both the major and minor diastereomers; \*\*peaks of (C=O)CF<sub>3</sub>, (C=O)CF<sub>3</sub> for the minor diastereomer were not observed at the signal-to-noise ratio of the measurement)

**<sup>19</sup>F NMR** (471 MHz, CD<sub>2</sub>Cl<sub>2</sub>)  $\delta$  -76.26, -76.36, -76.48, -76.57.

**Optical Rotation:**  $\alpha_D^{20}$  = +25.9° ( $c$  = 0.3, MeOH, 93:7 er)



**HRMS:** Exact mass calculated for  $[\text{C}_{36}\text{H}_{37}\text{F}_6\text{N}_3\text{O}_7 + \text{H}]^+$  requires  $m/z = 738.2609$ , found  $m/z = 738.2593$ .

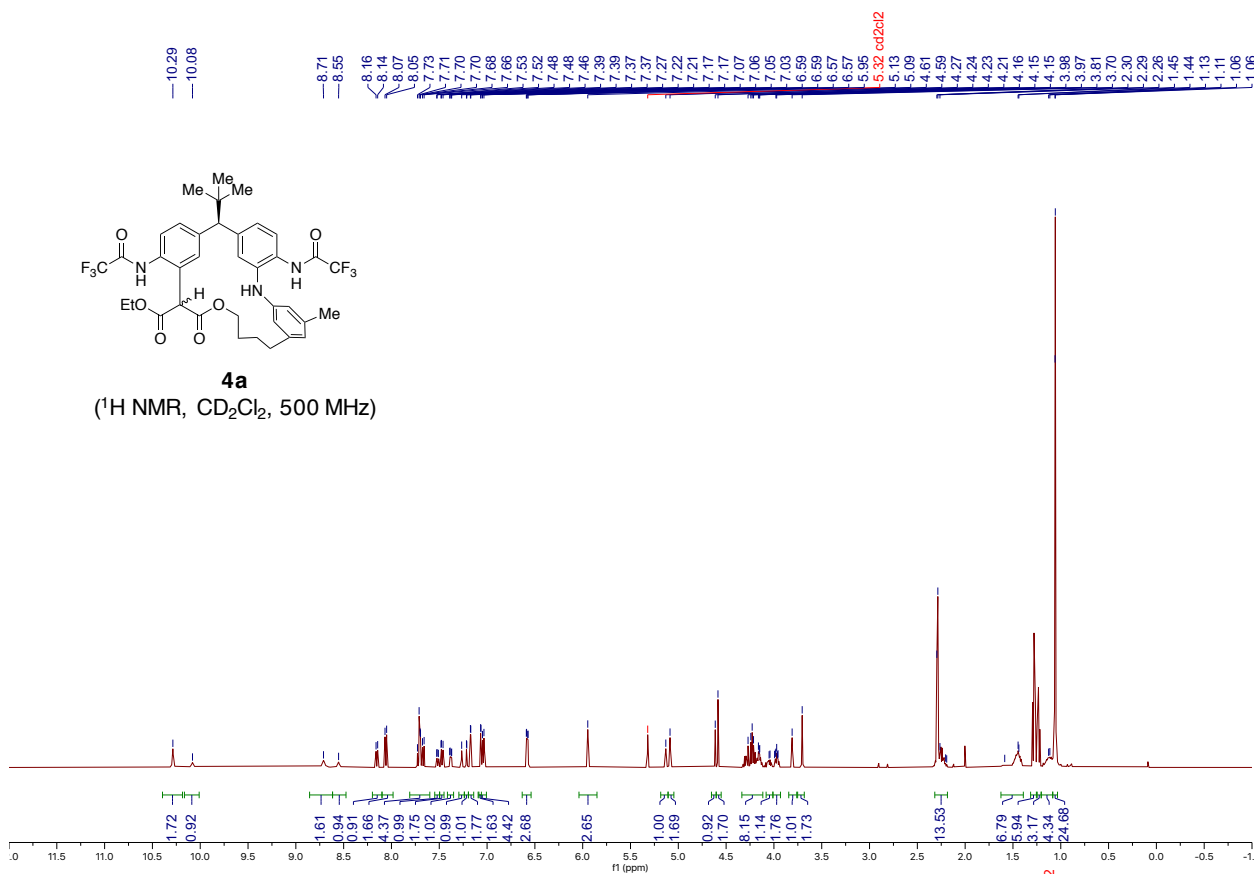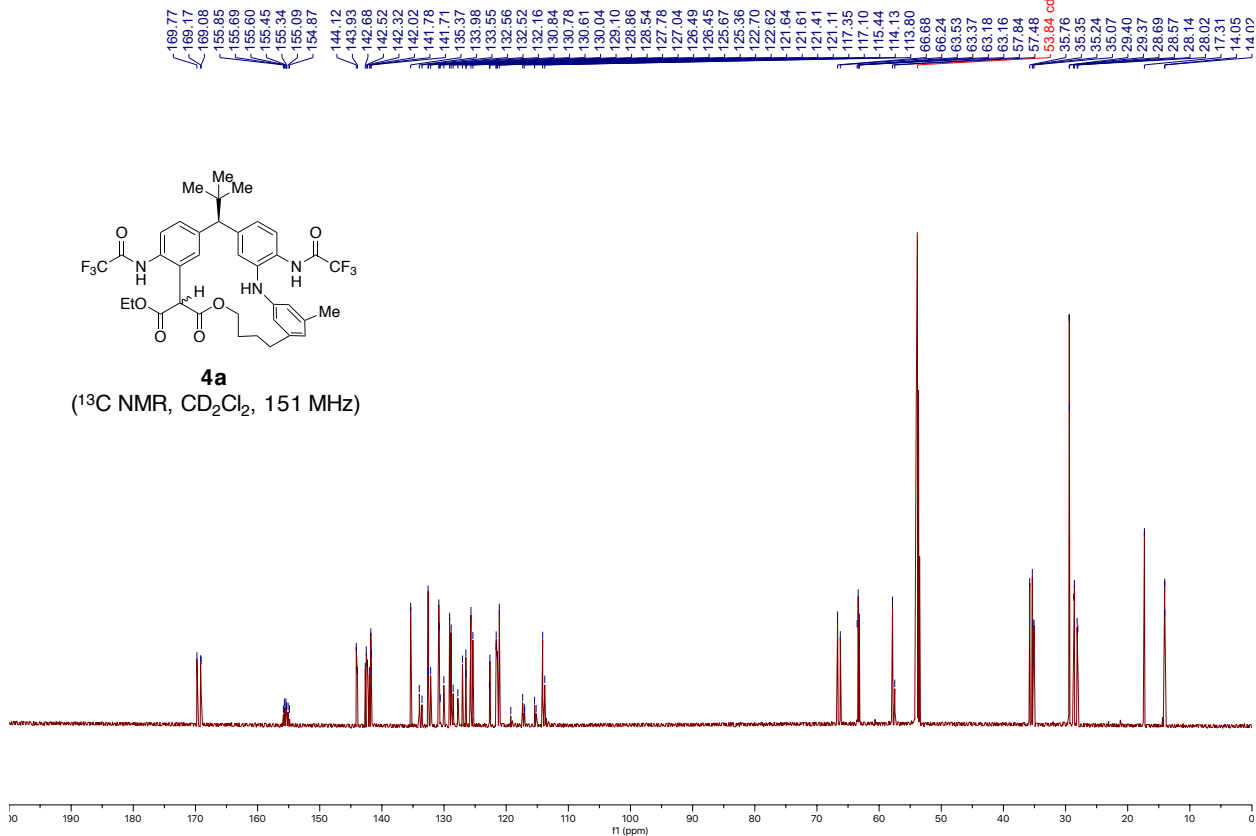

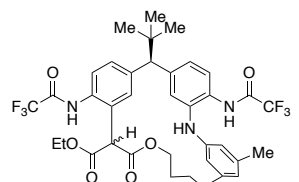

**4a**  
(<sup>1</sup>H NMR, CD<sub>2</sub>Cl<sub>2</sub>, 471 MHz)

-76.17  
-76.52  
-76.52  
-76.54

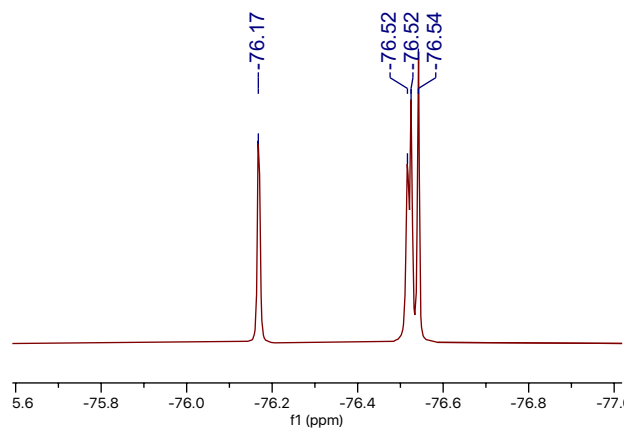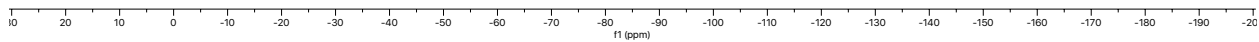

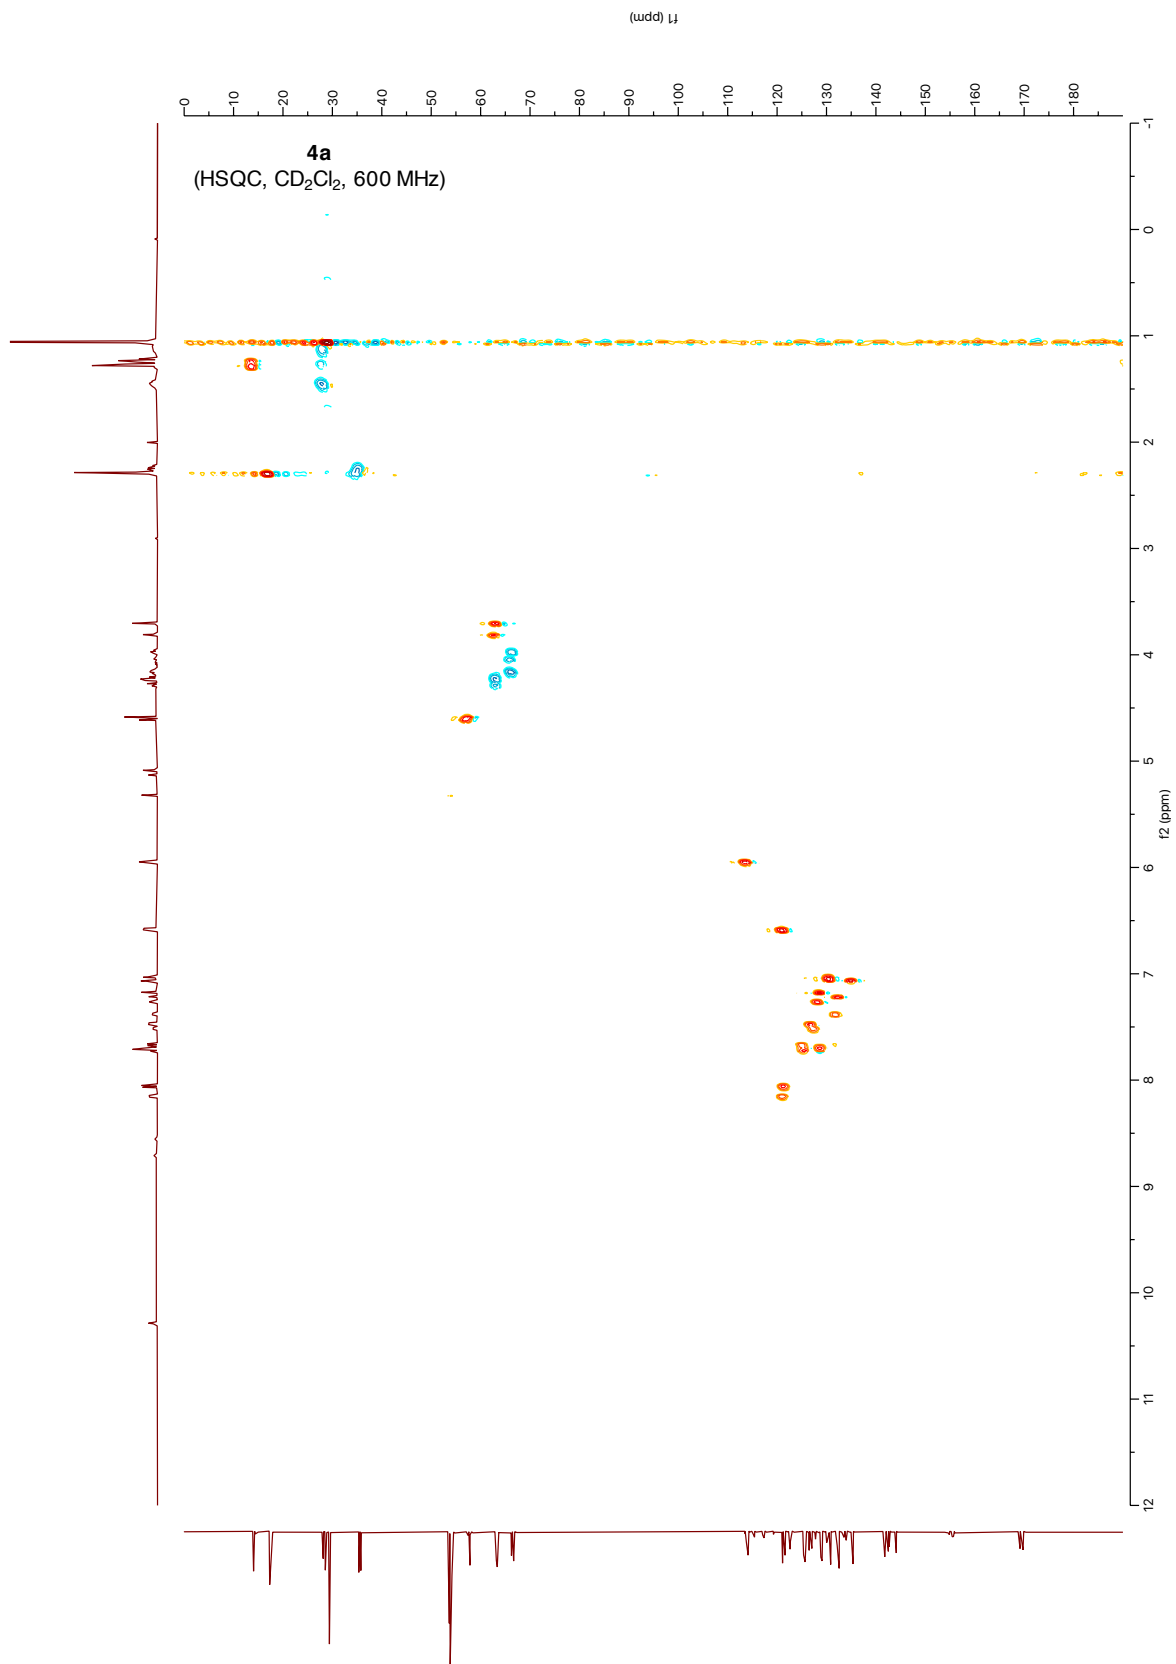

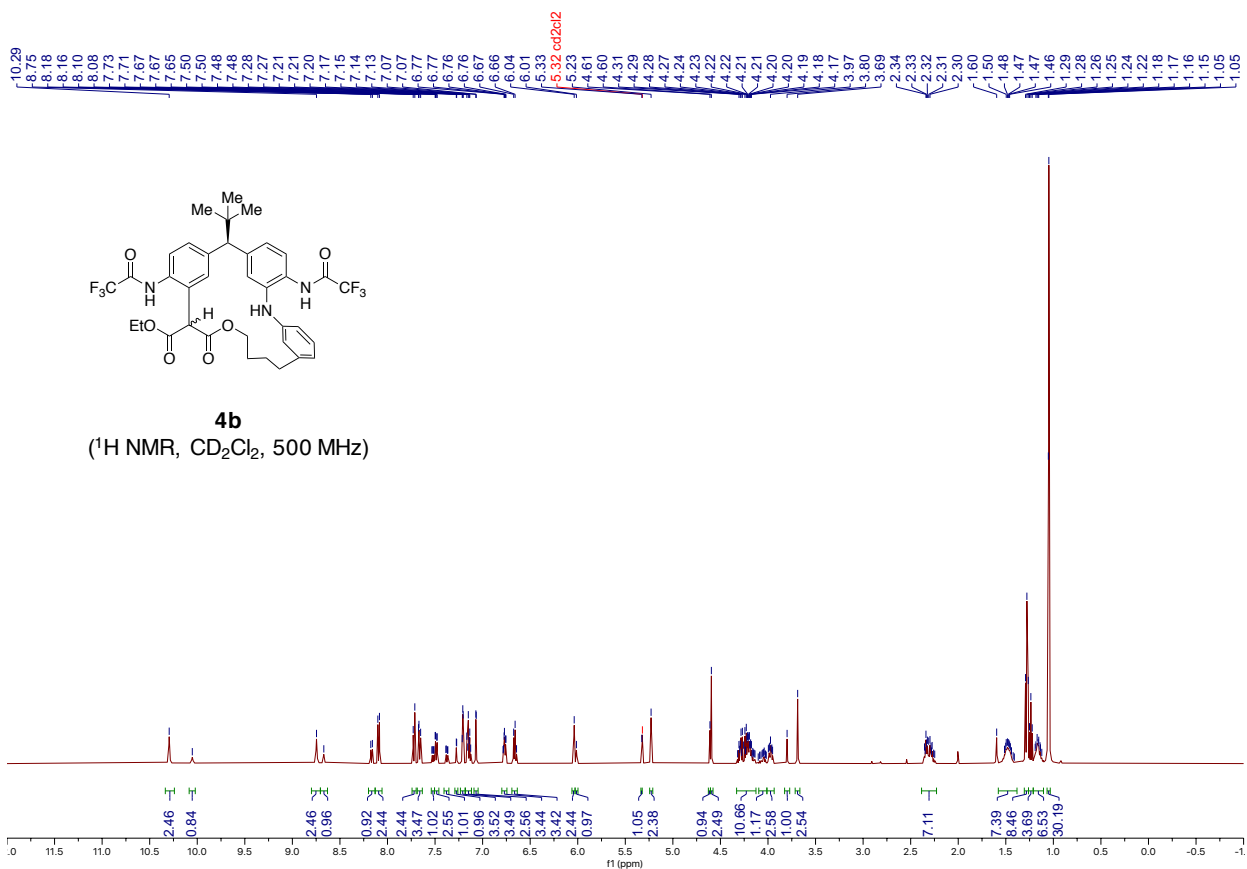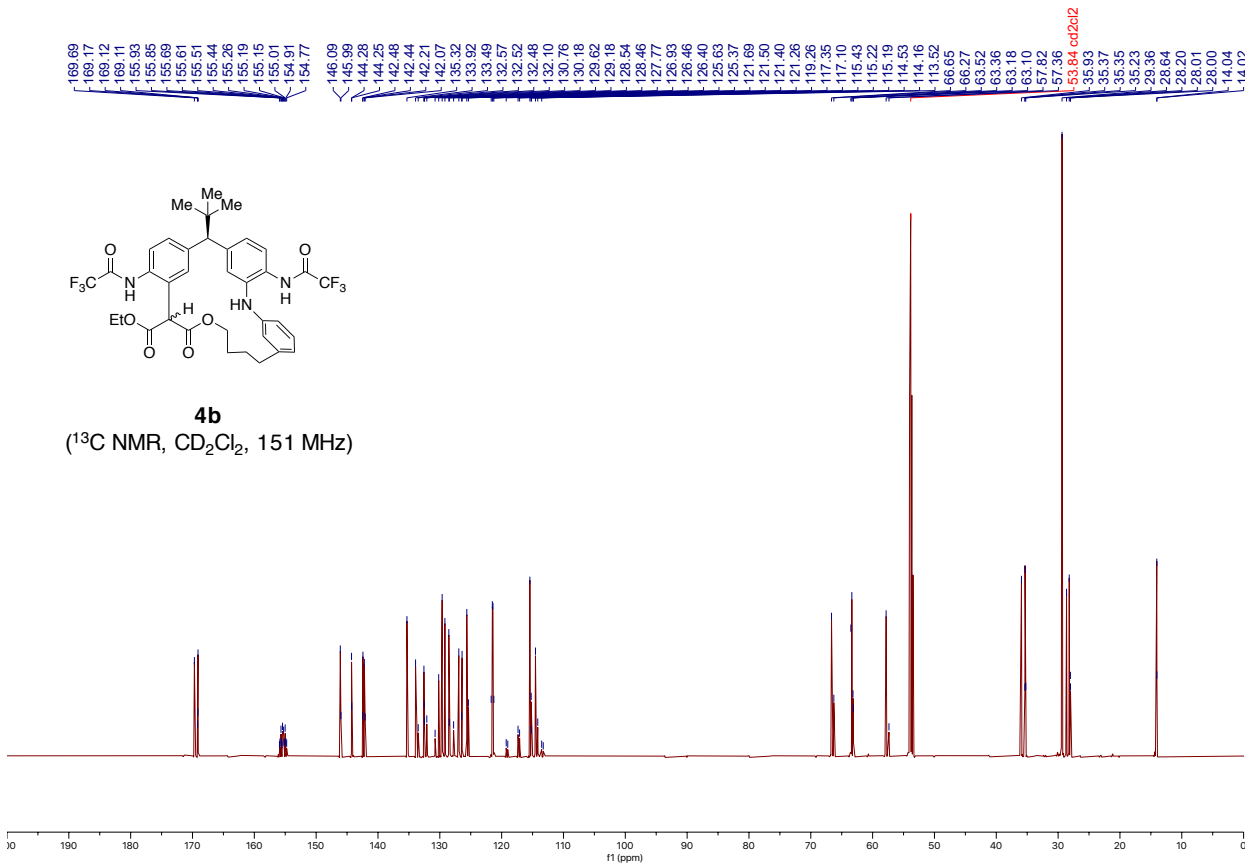

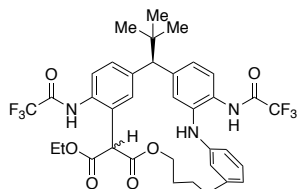

**4b**  
(<sup>19</sup>F NMR, CD<sub>2</sub>Cl<sub>2</sub>, 471 MHz)

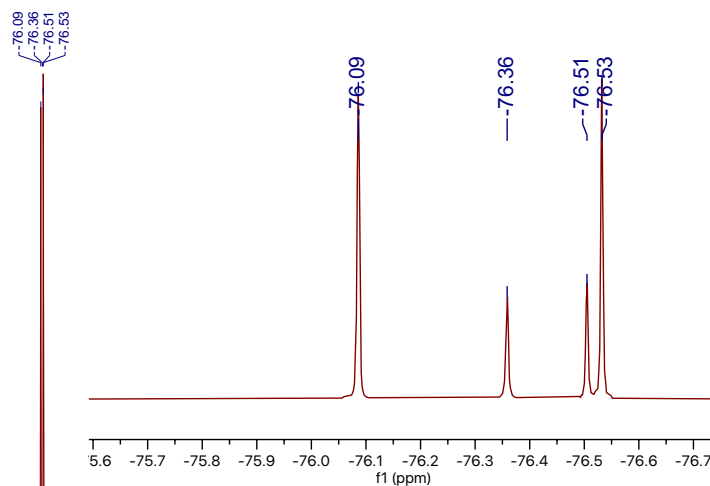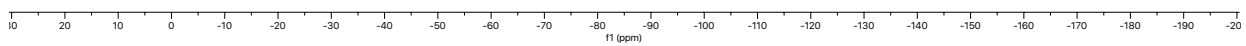

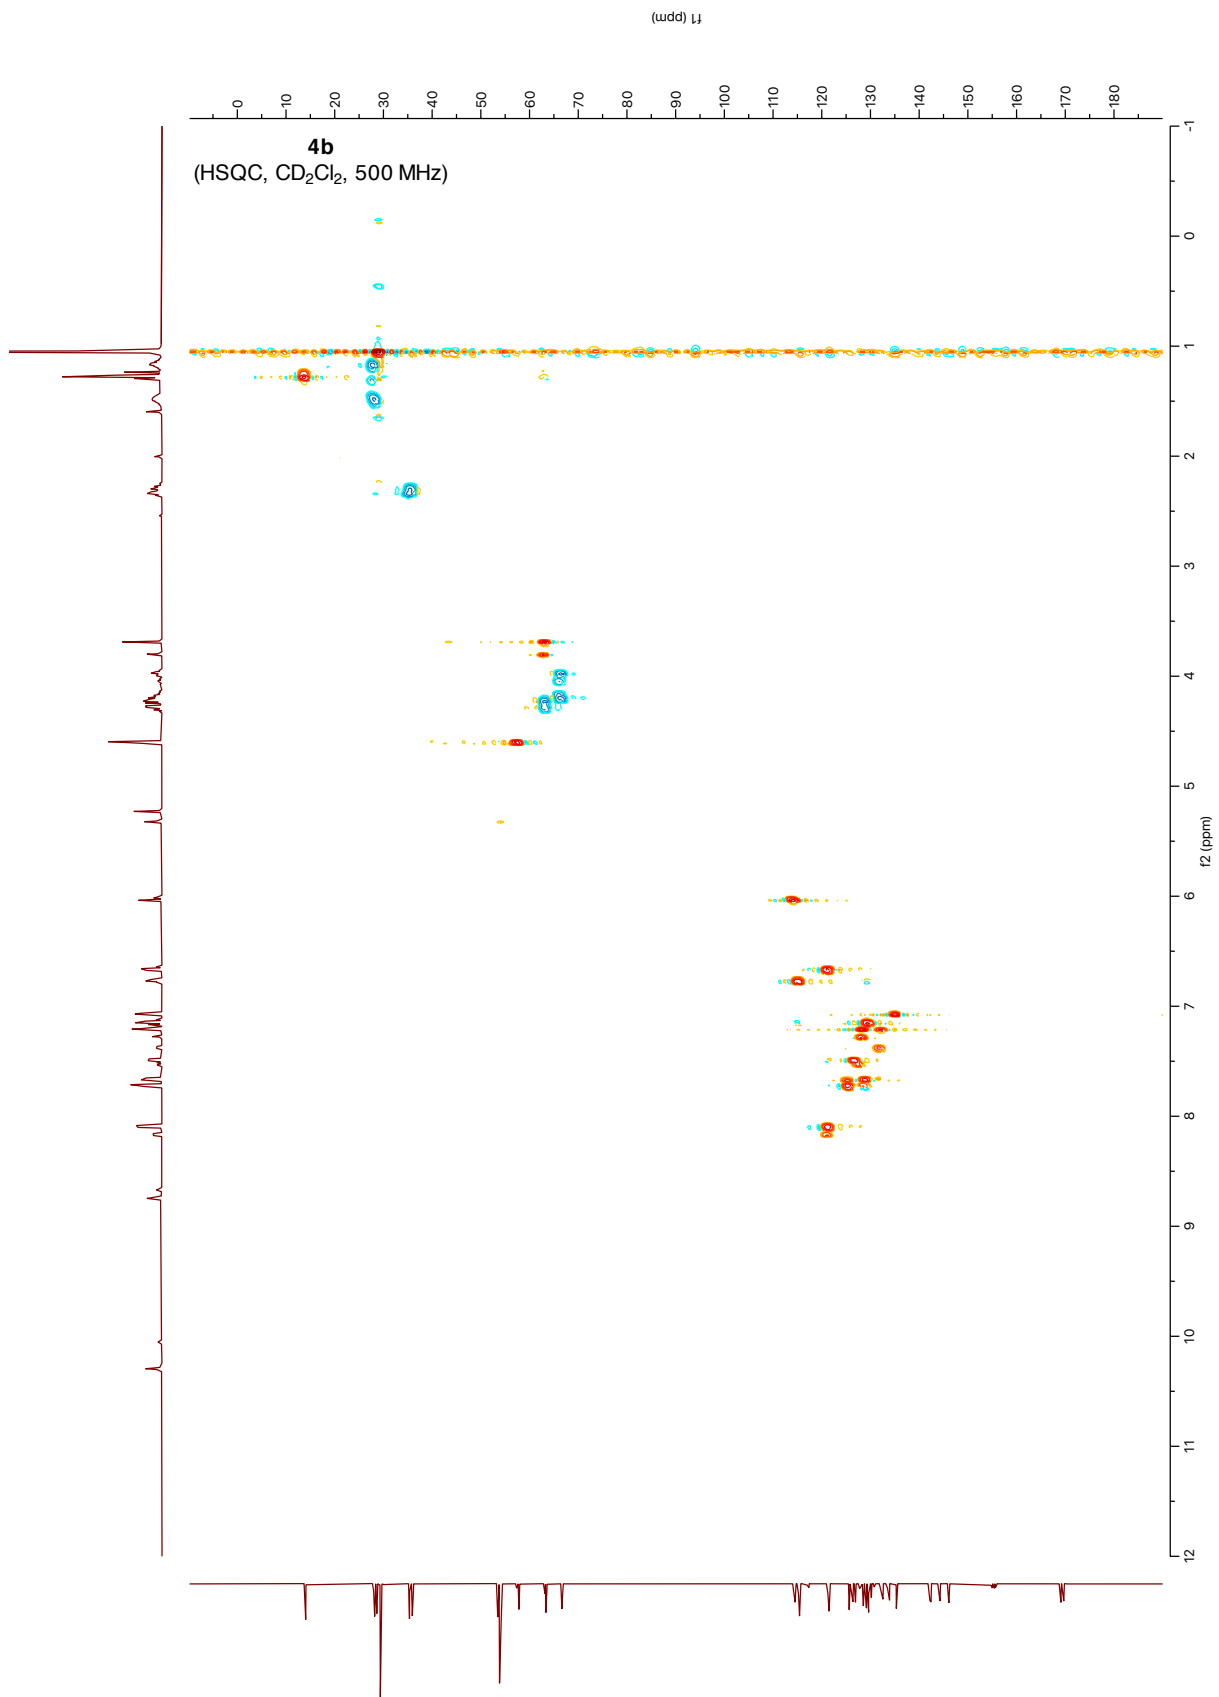

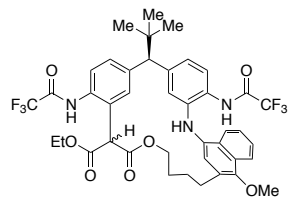**4c**<sup>1</sup>H NMR, CD<sub>2</sub>Cl<sub>2</sub>, 500 MHz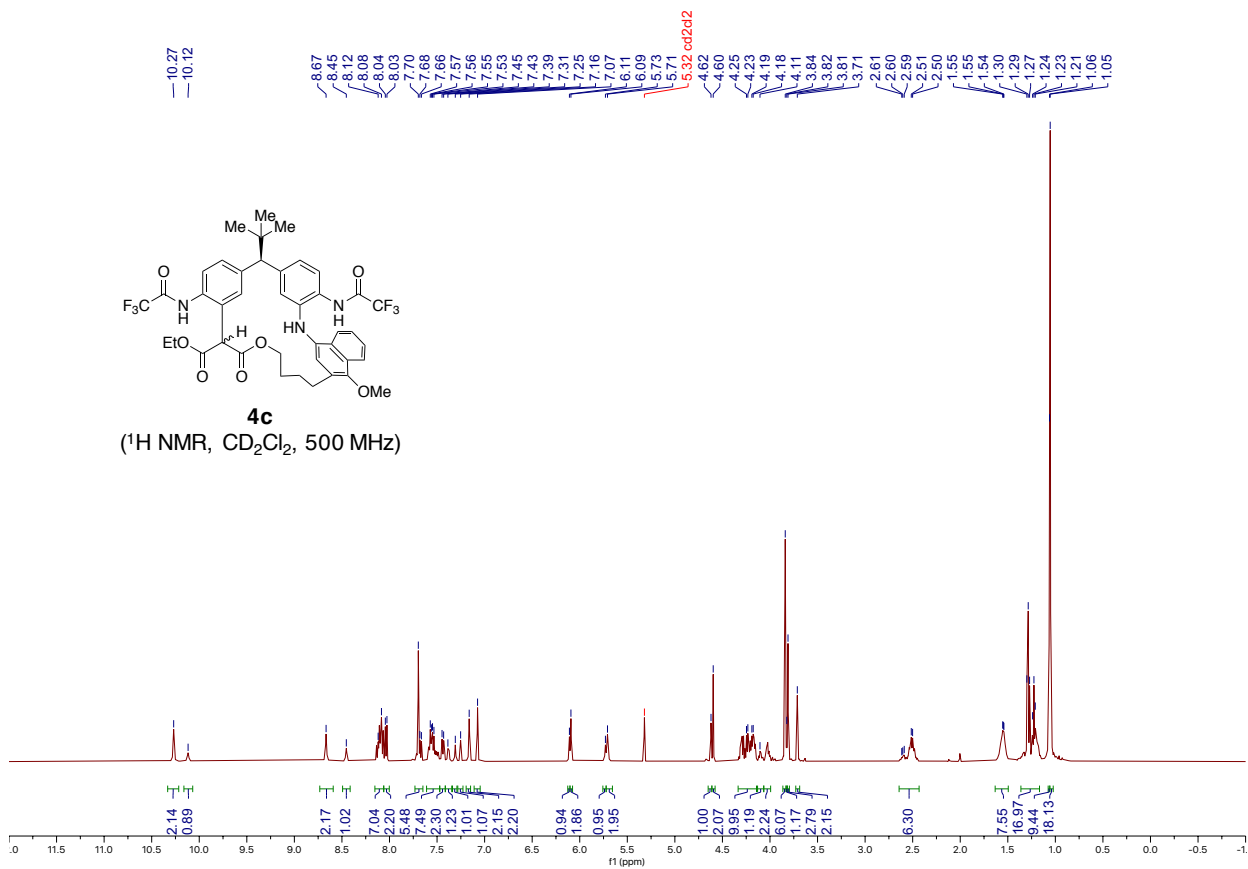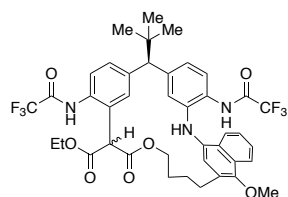**4c**<sup>13</sup>C NMR, CD<sub>2</sub>Cl<sub>2</sub>, 126 MHz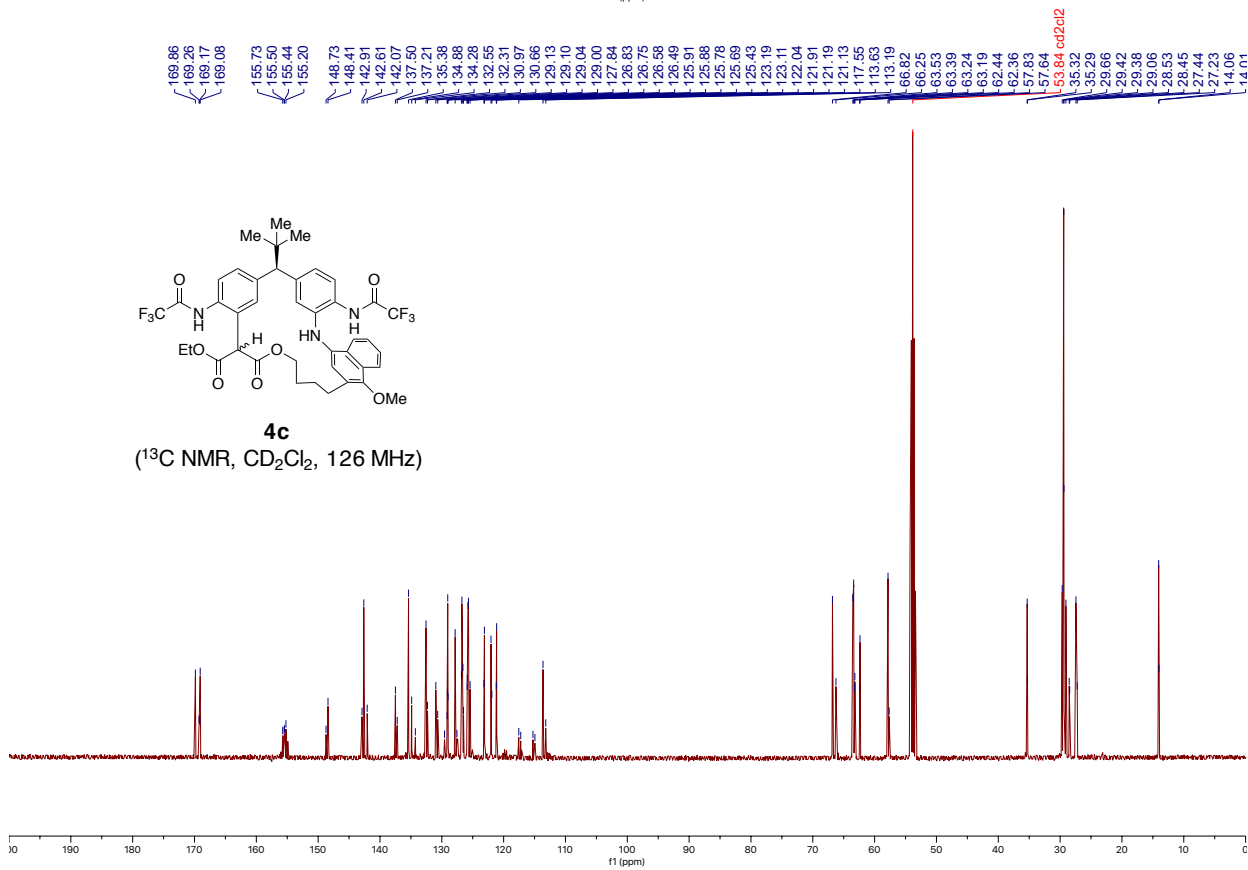



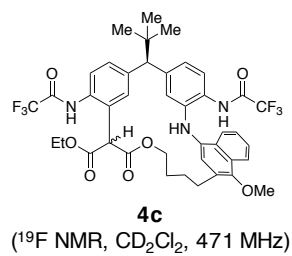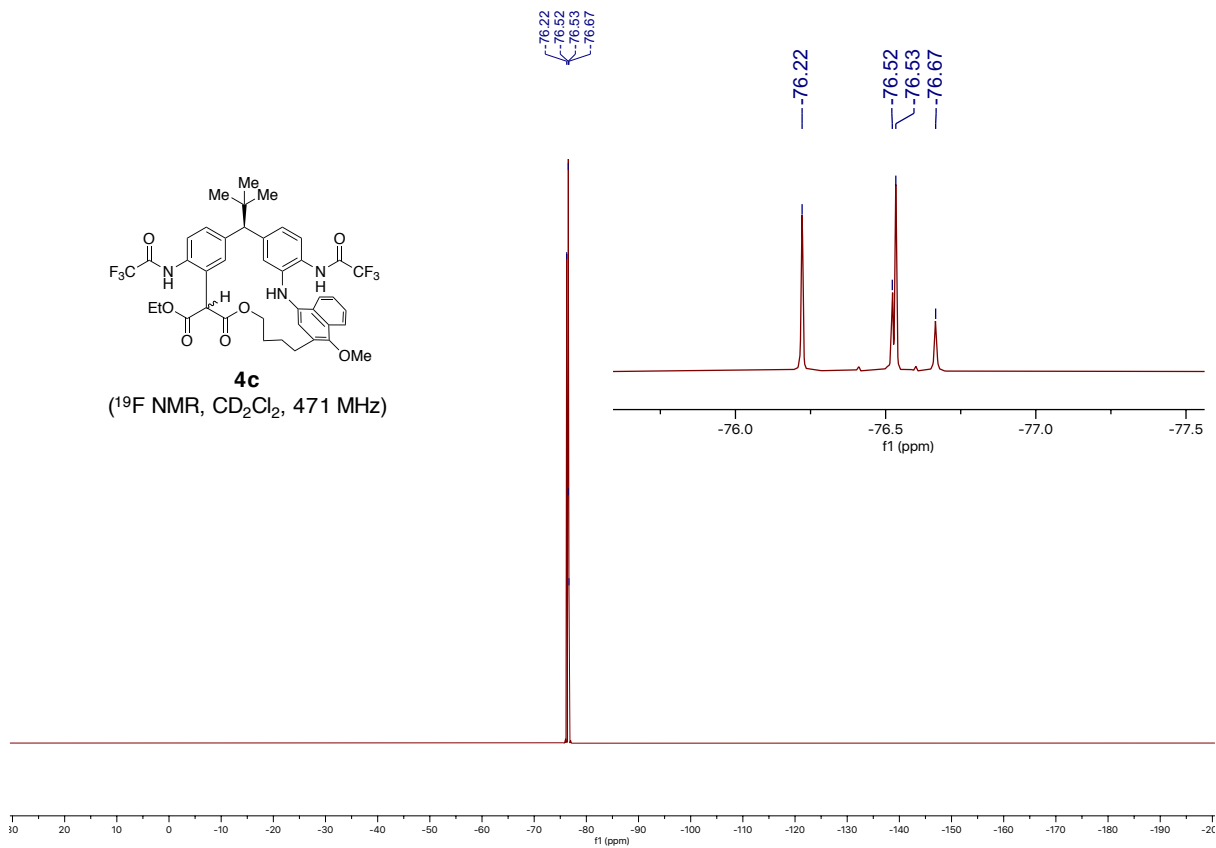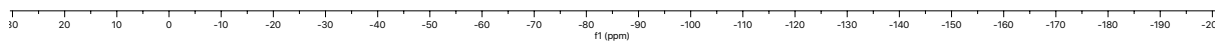

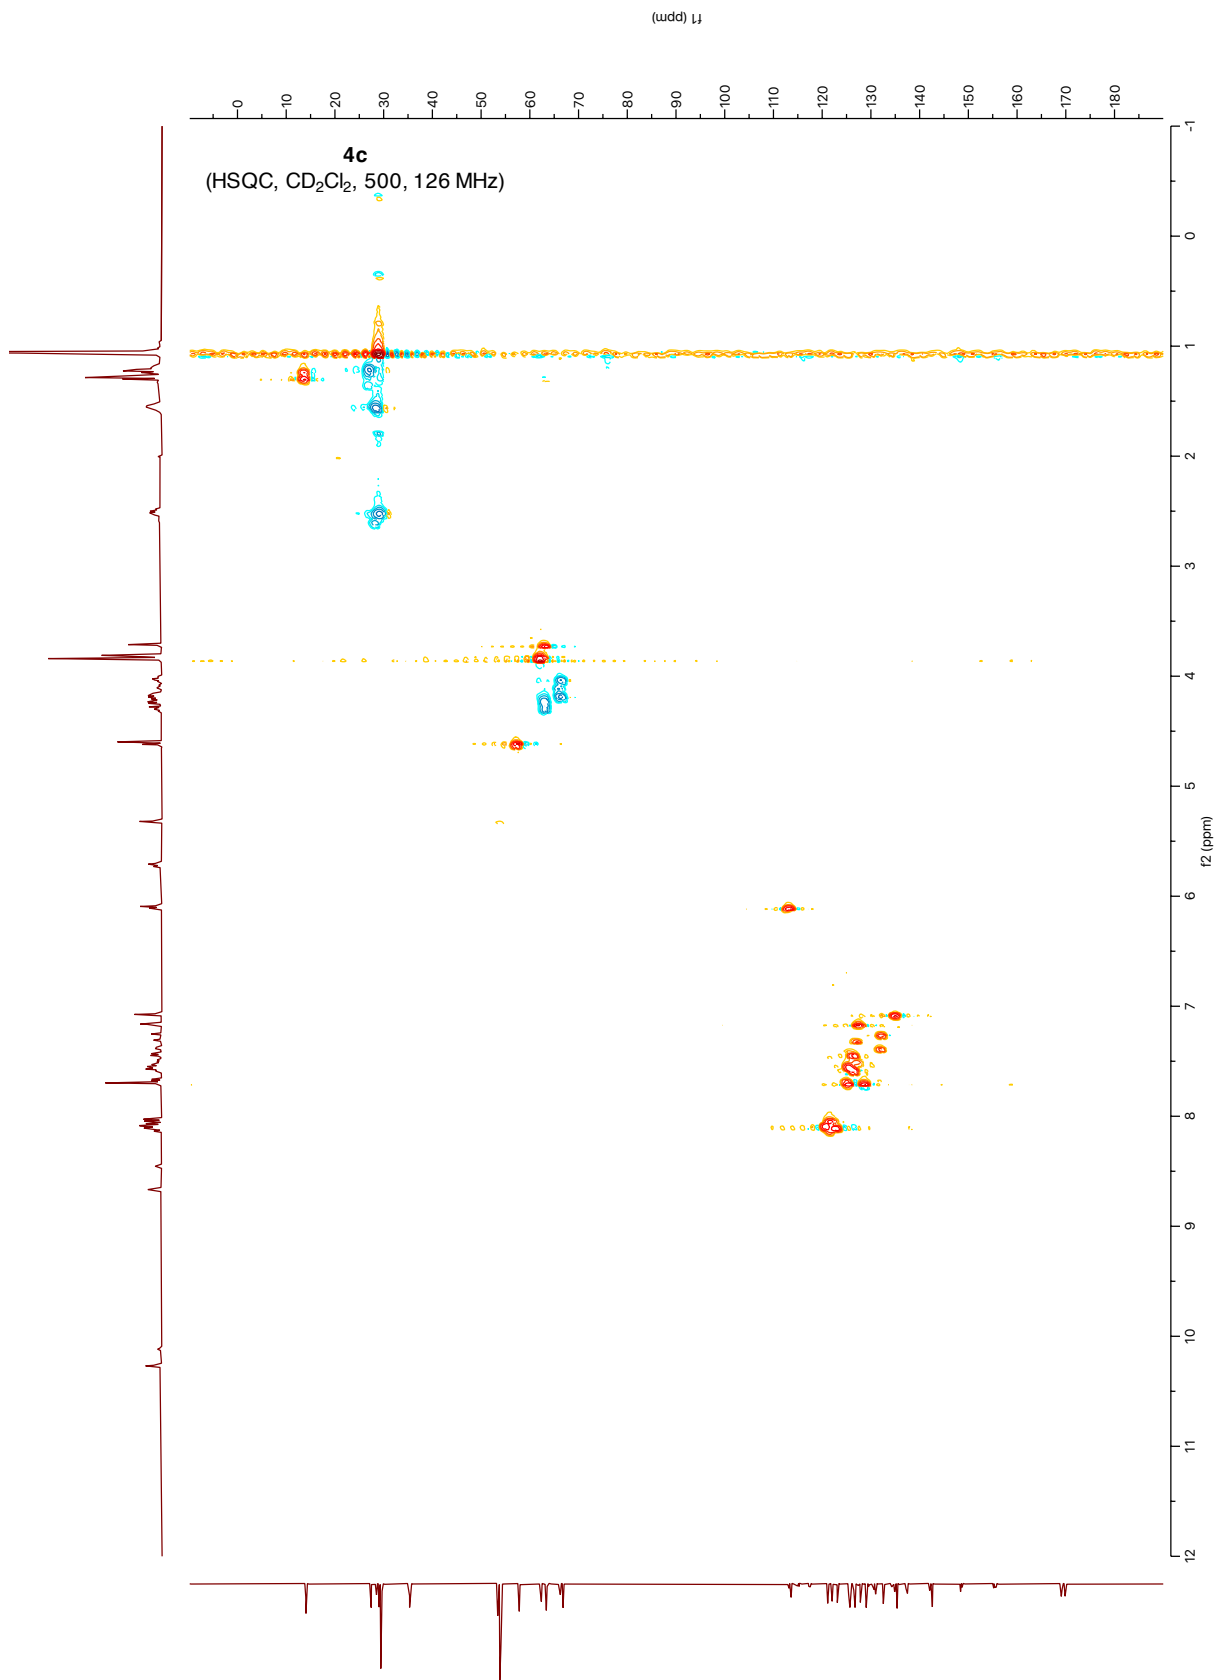

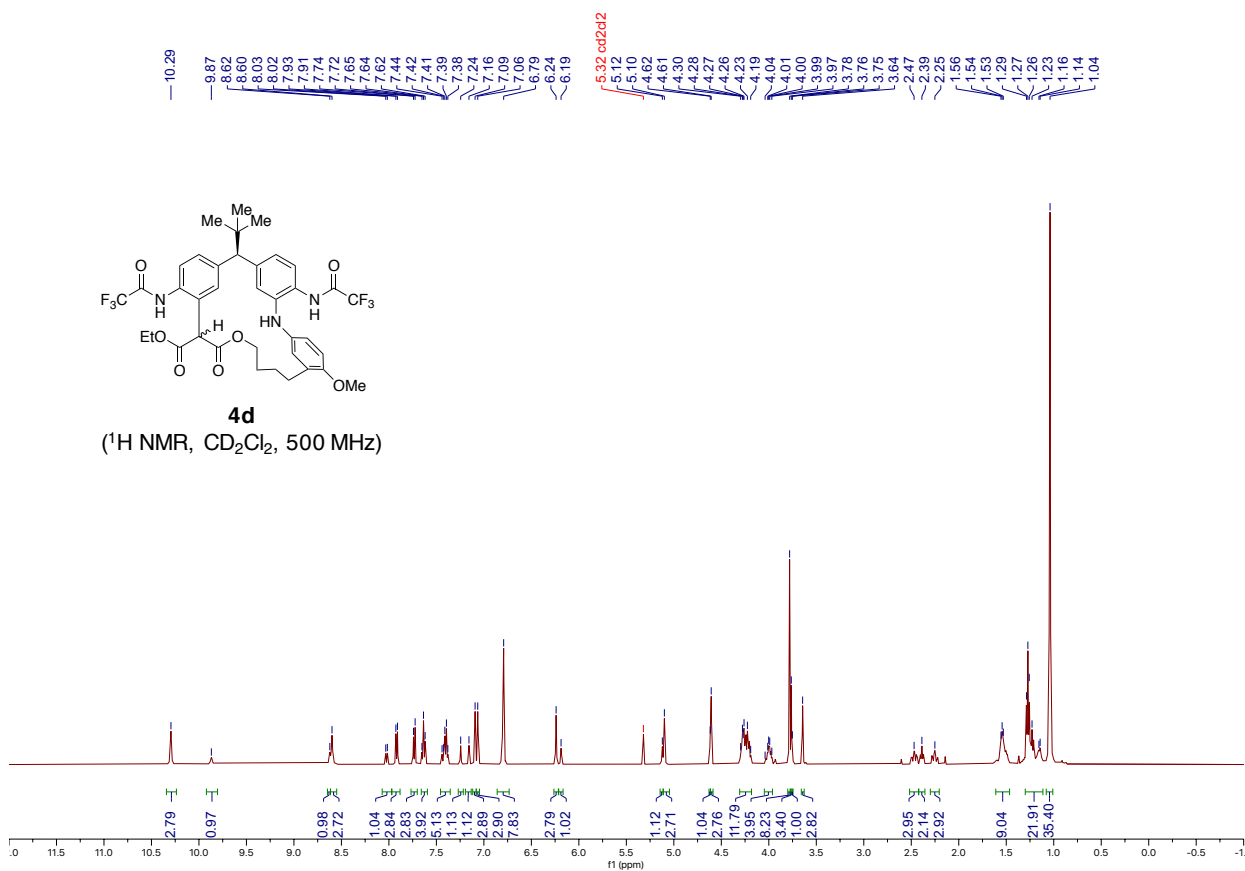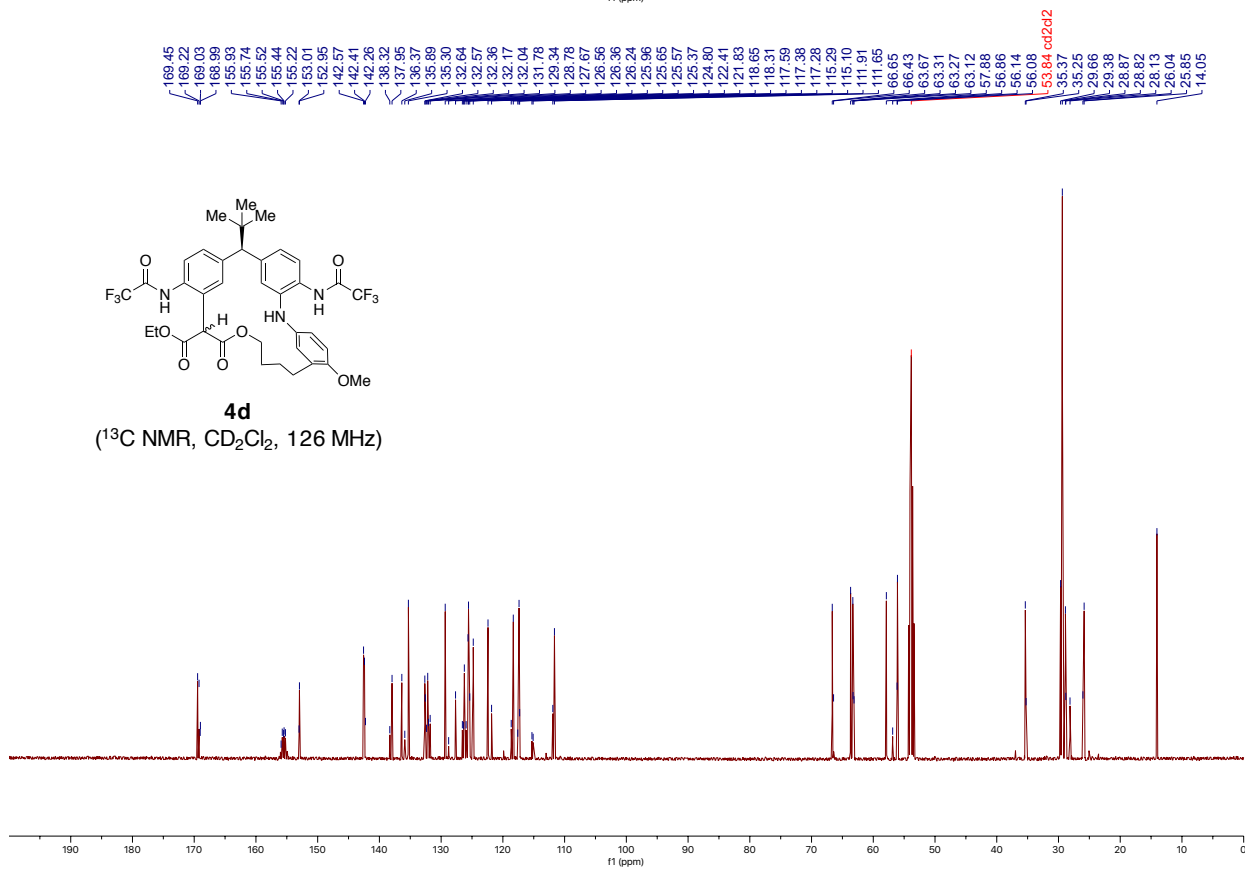

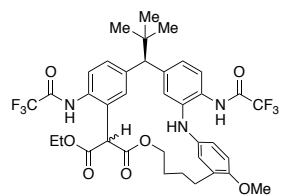

**4d**  
( $^{19}\text{F}$  NMR,  $\text{CD}_2\text{Cl}_2$ , 471 MHz)

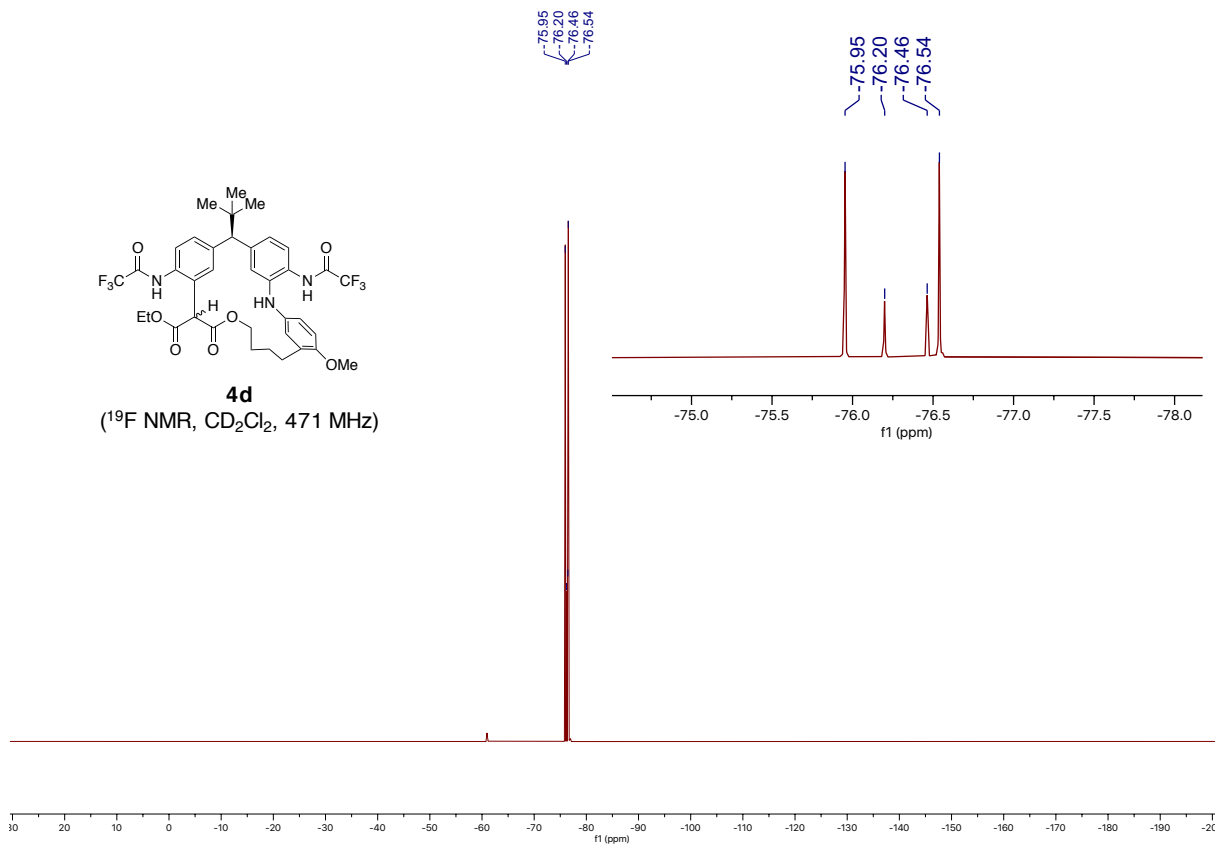

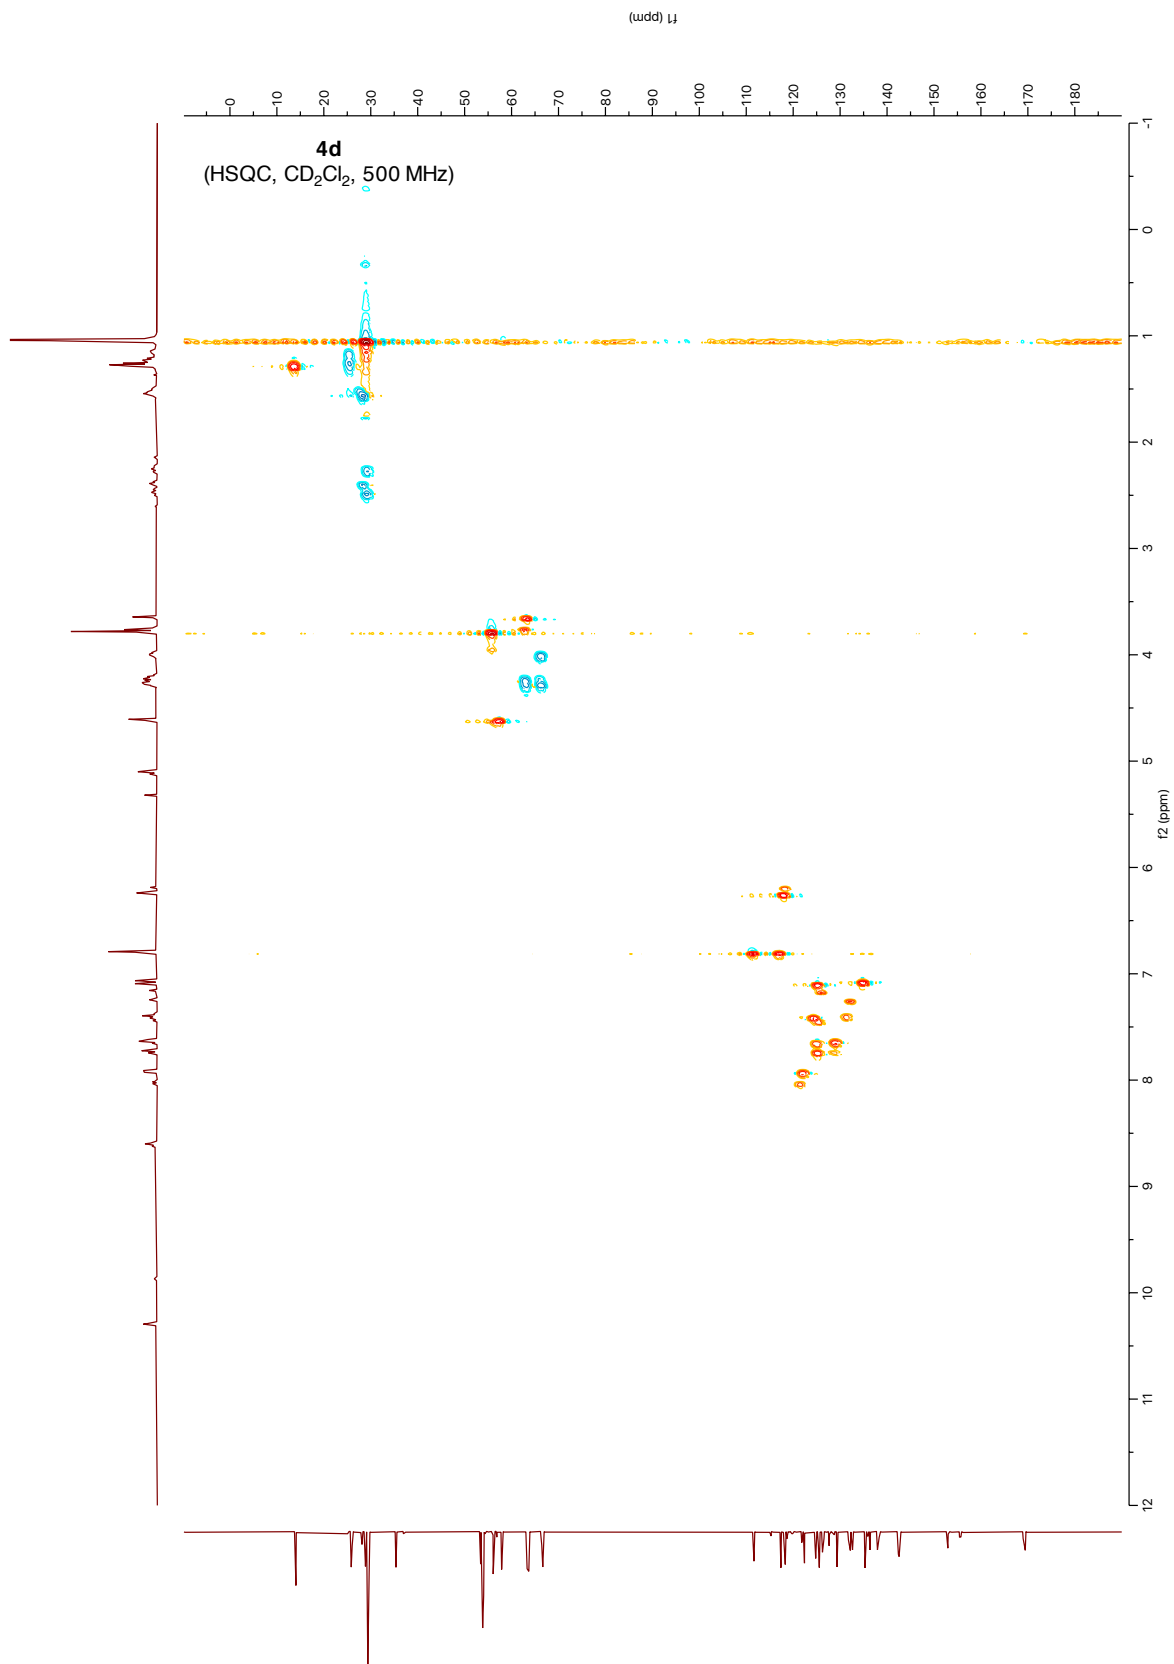

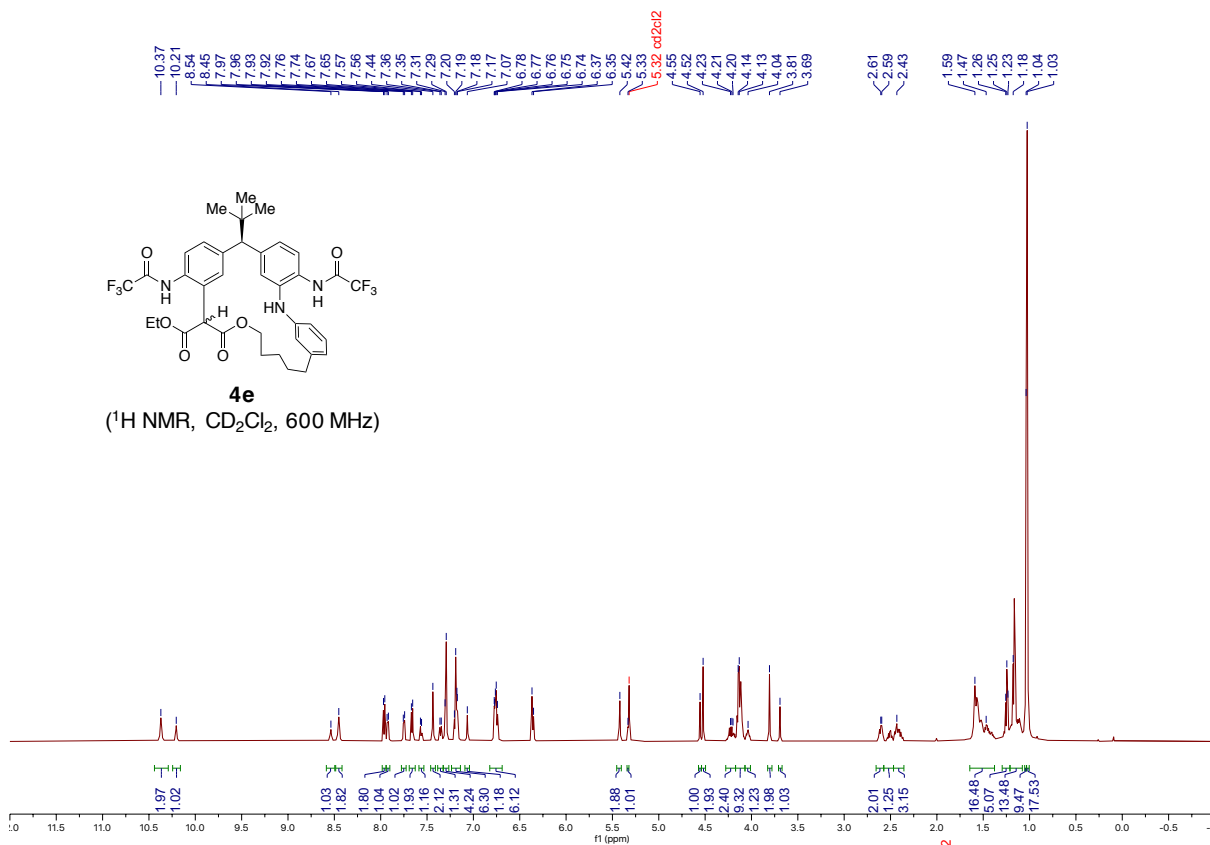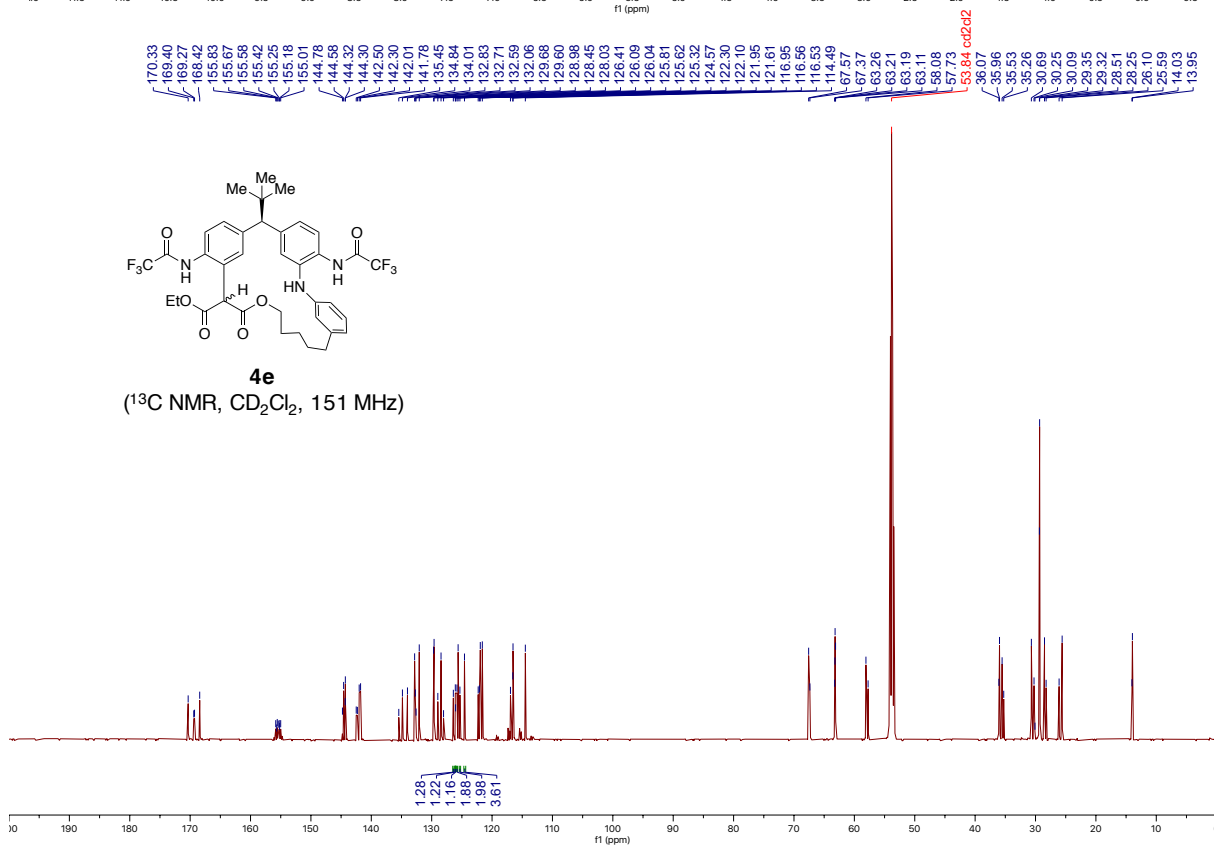

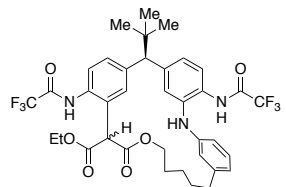

**4e**  
(<sup>19</sup>F NMR, CD<sub>2</sub>Cl<sub>2</sub>, 471 MHz)

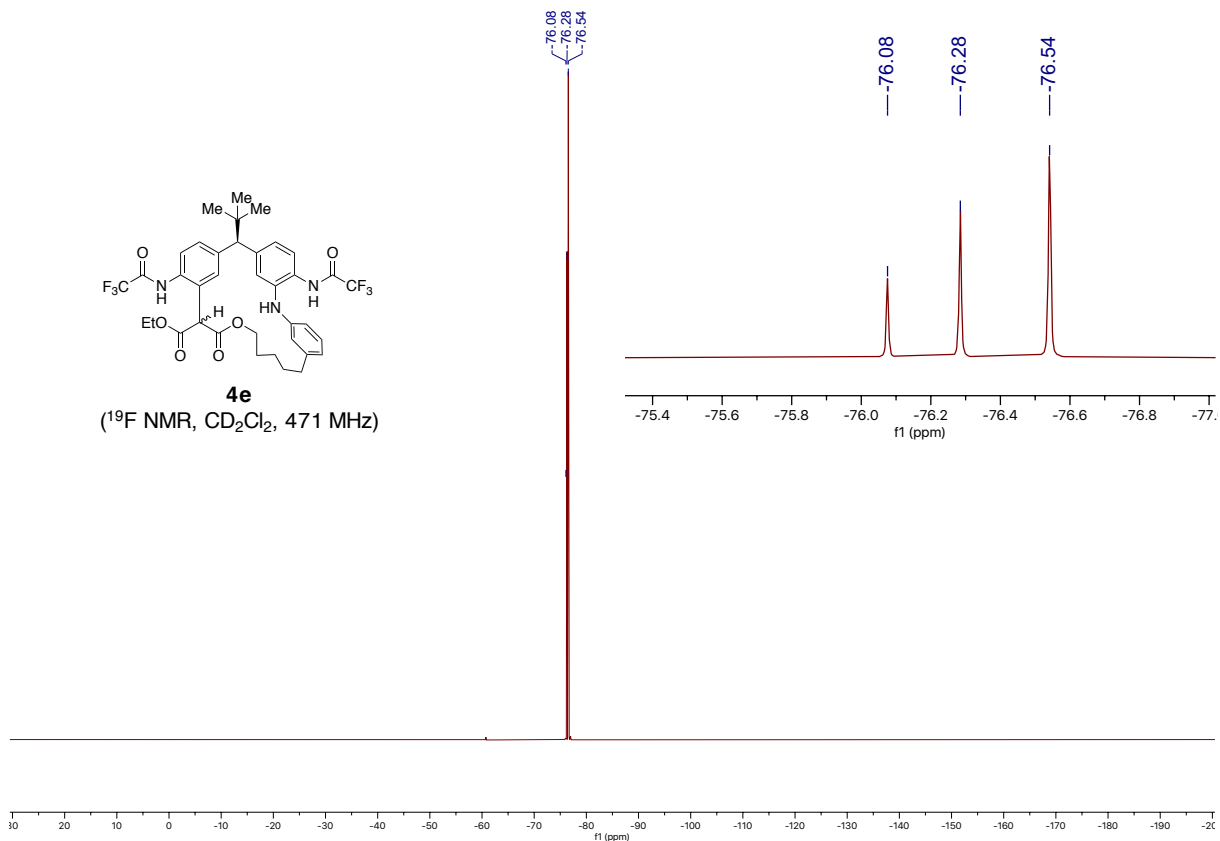

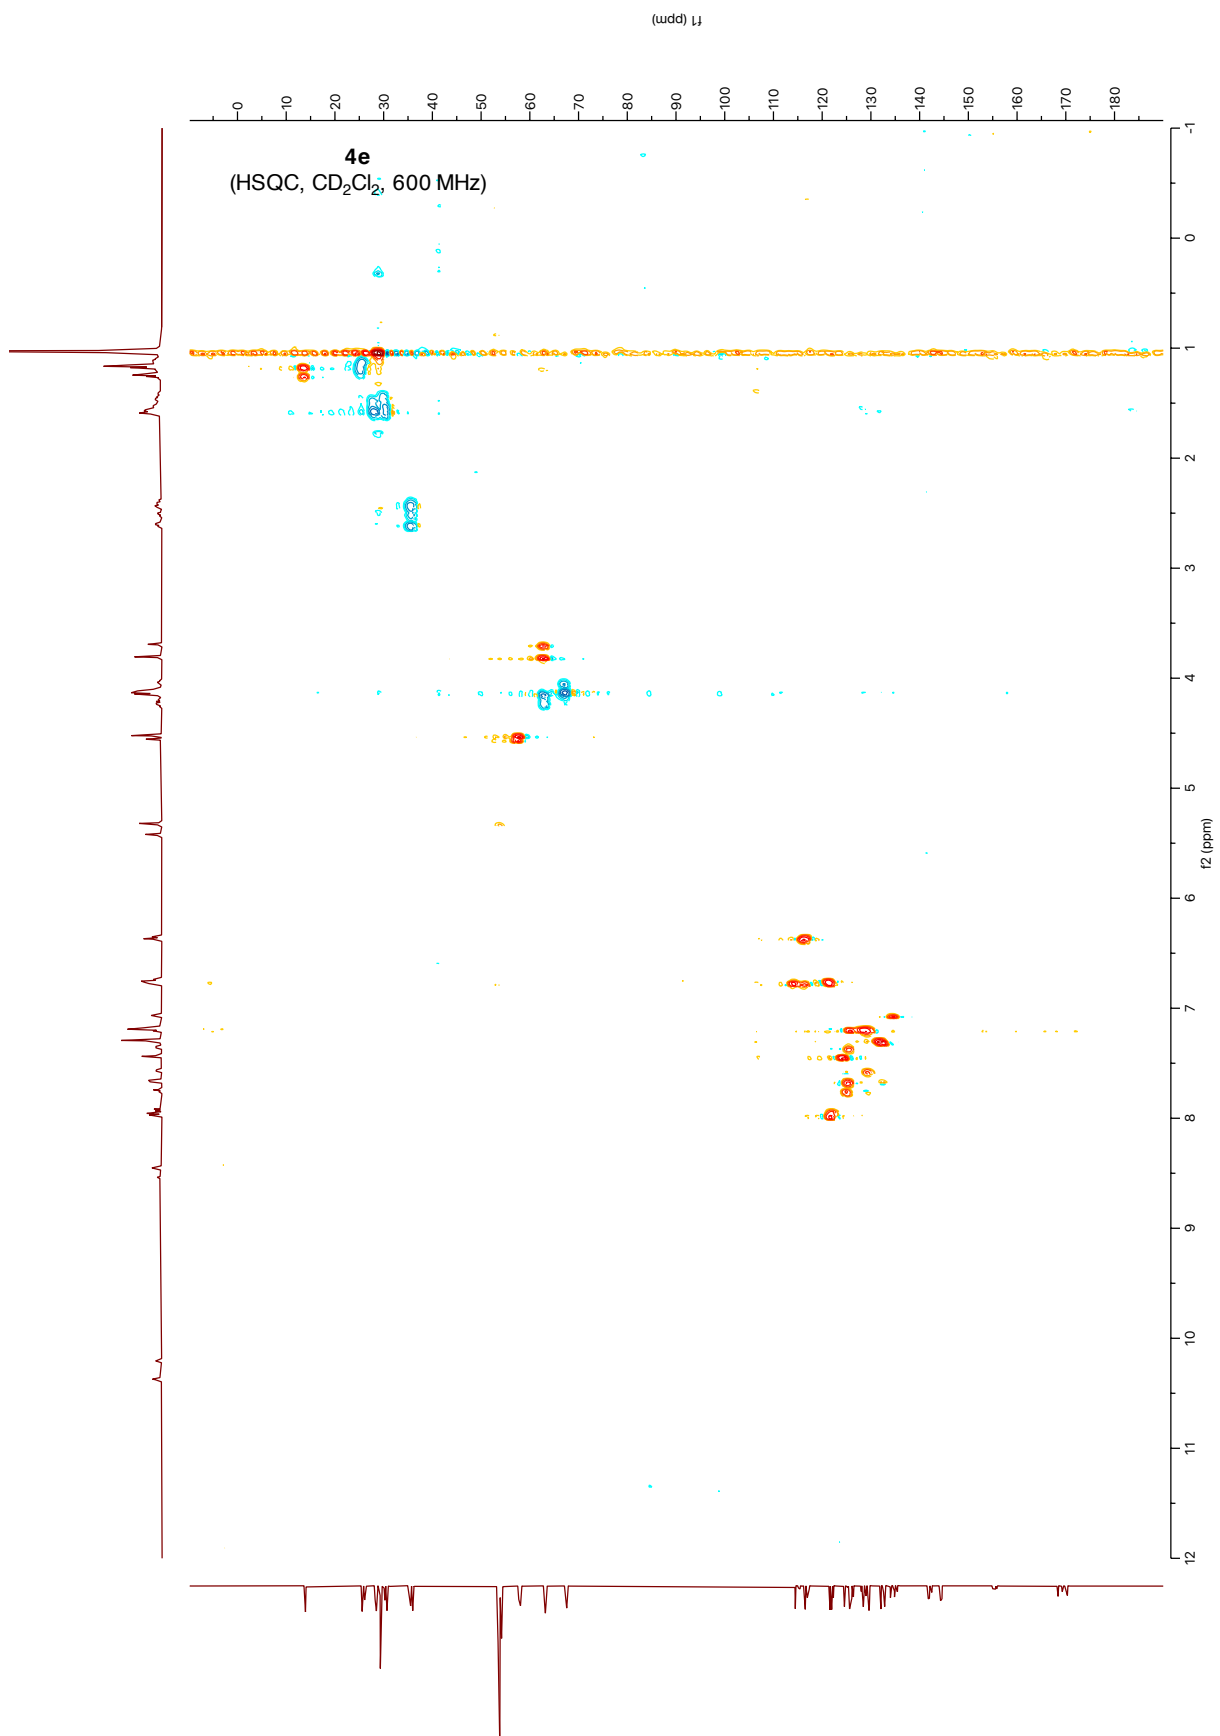



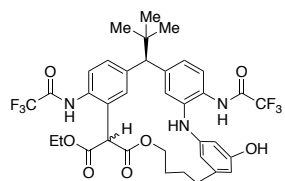**4f**<sup>1</sup>H NMR, CD<sub>2</sub>Cl<sub>2</sub>, 600 MHz)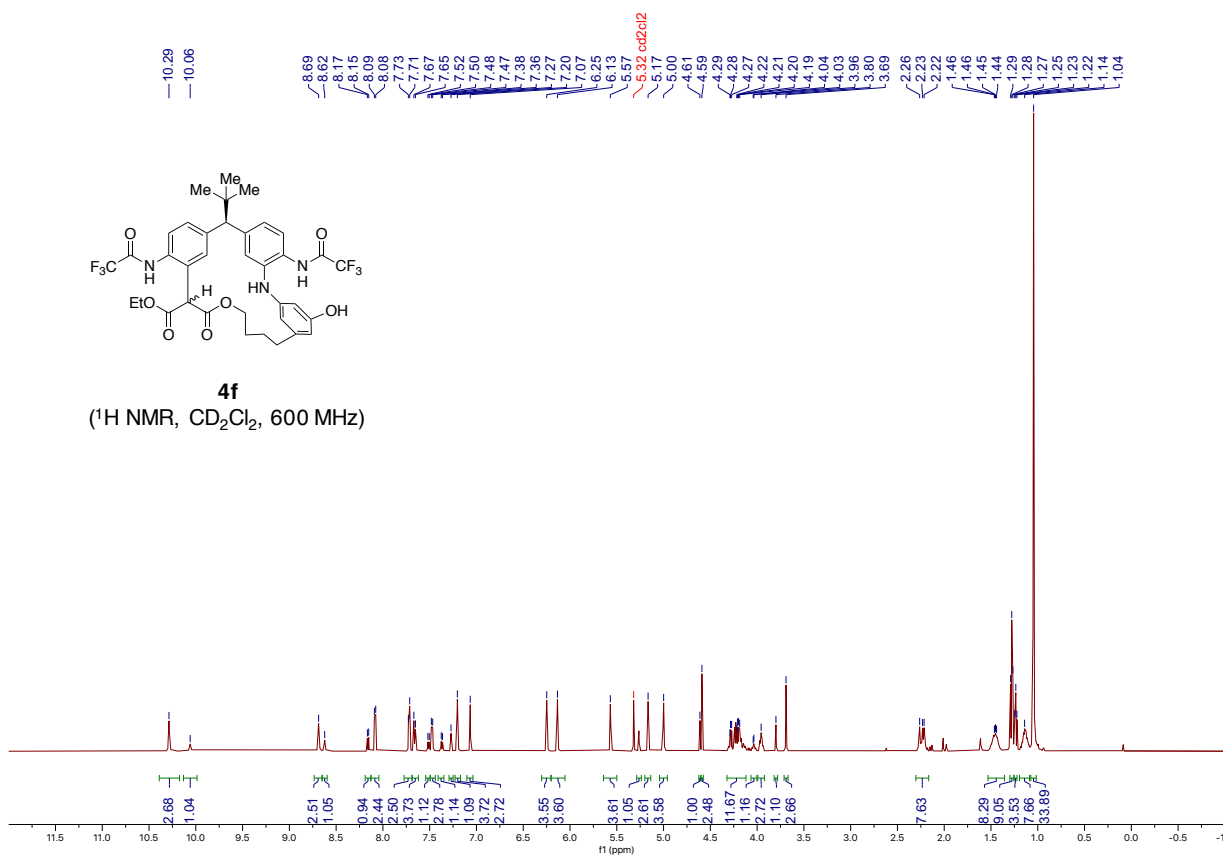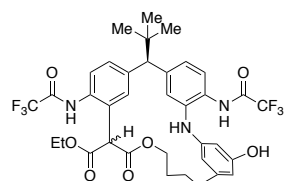**4f**<sup>13</sup>C NMR, CD<sub>2</sub>Cl<sub>2</sub>, 151 MHz)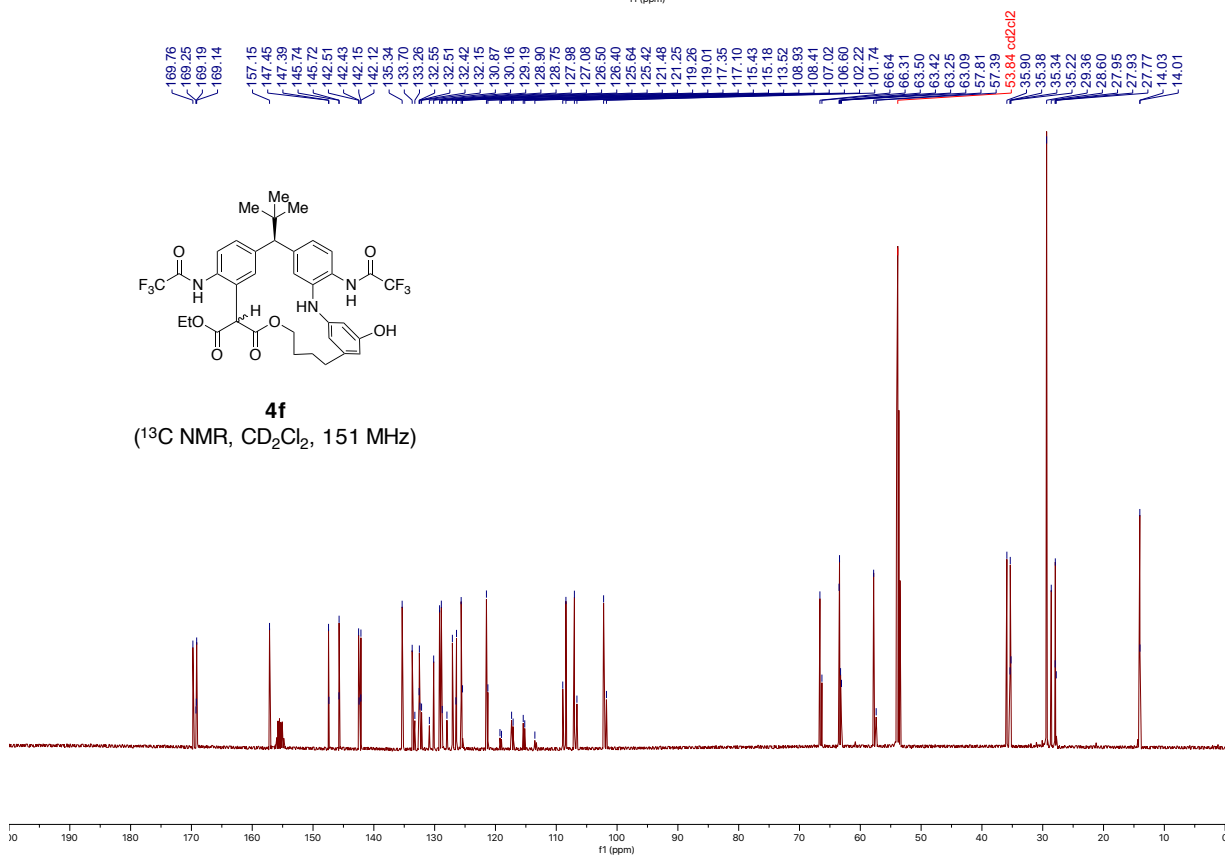

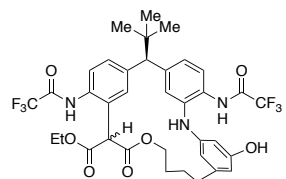

**4f**  
(<sup>19</sup>F NMR, CD<sub>2</sub>Cl<sub>2</sub>, 471 MHz)

76.11  
76.37  
76.51  
76.54

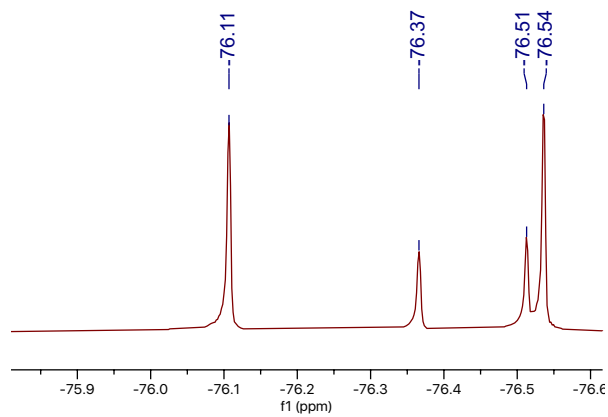

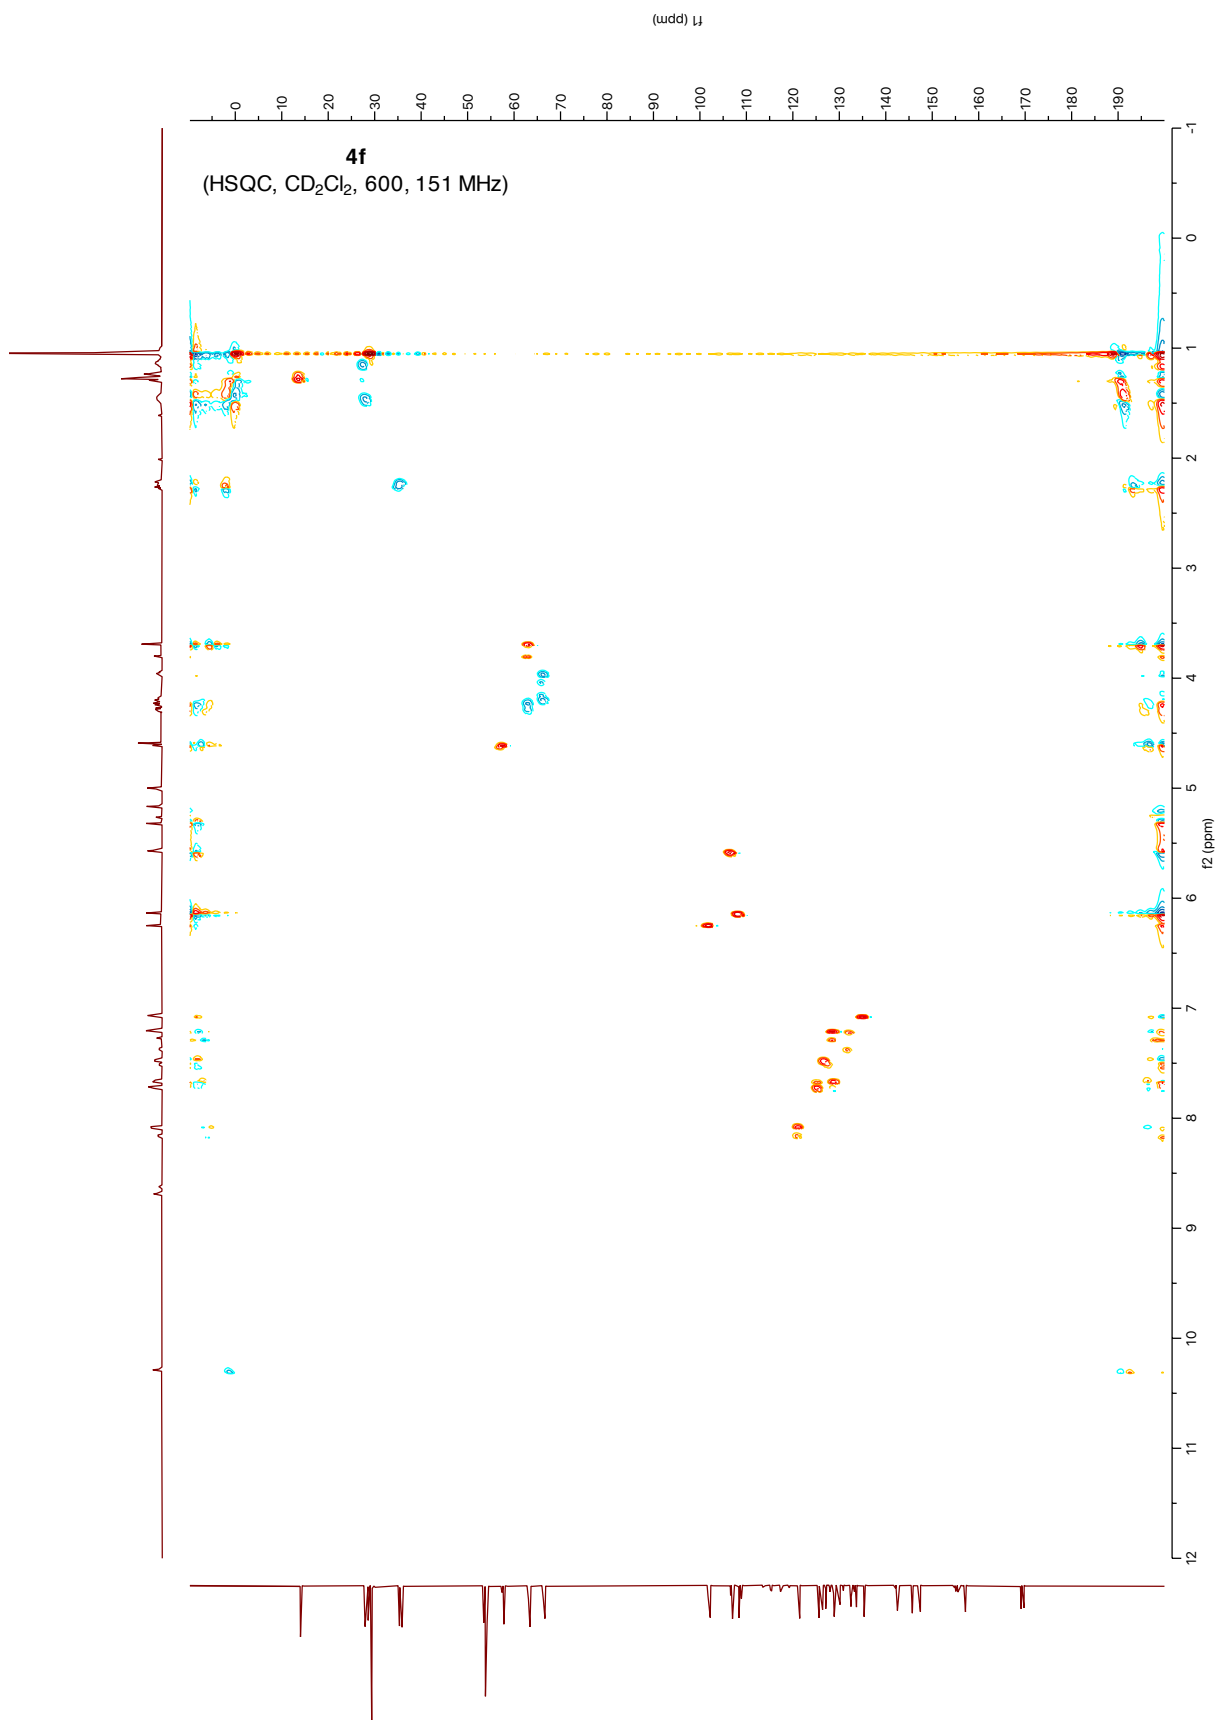

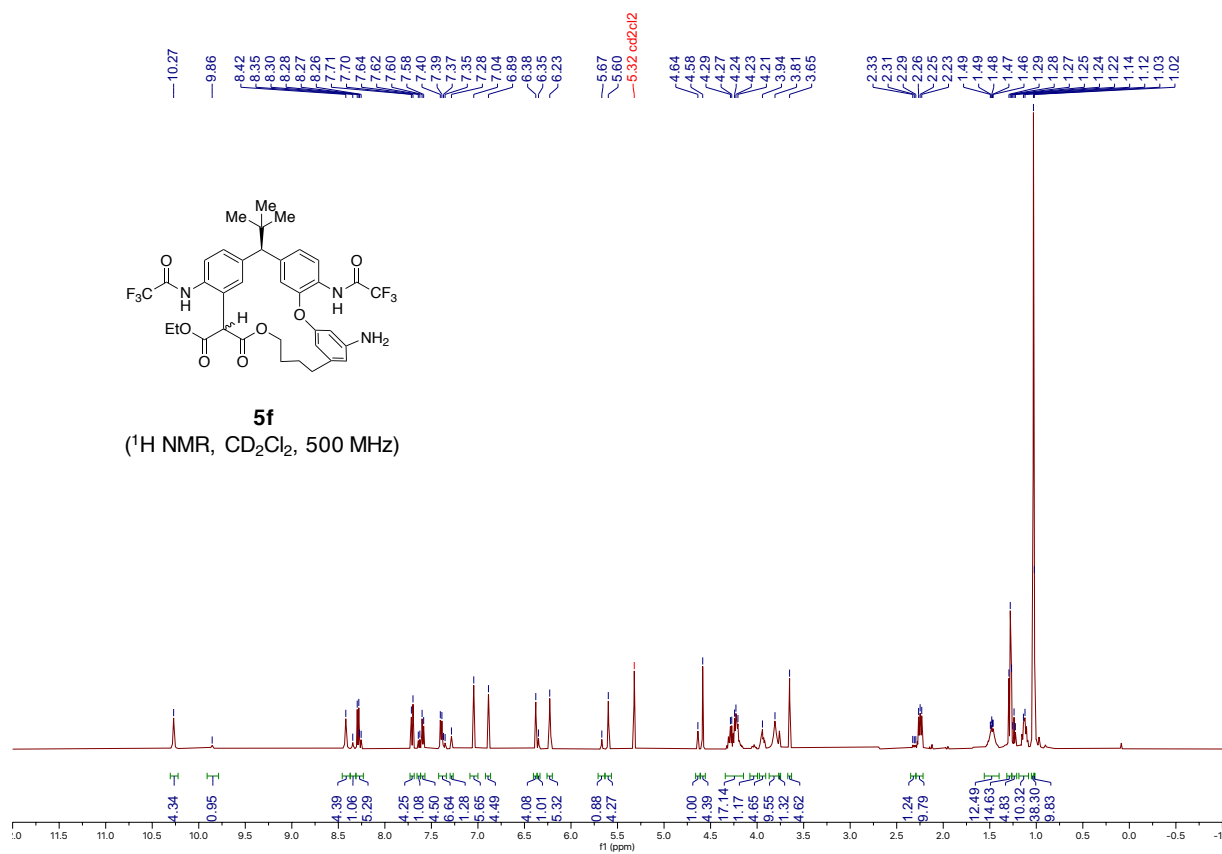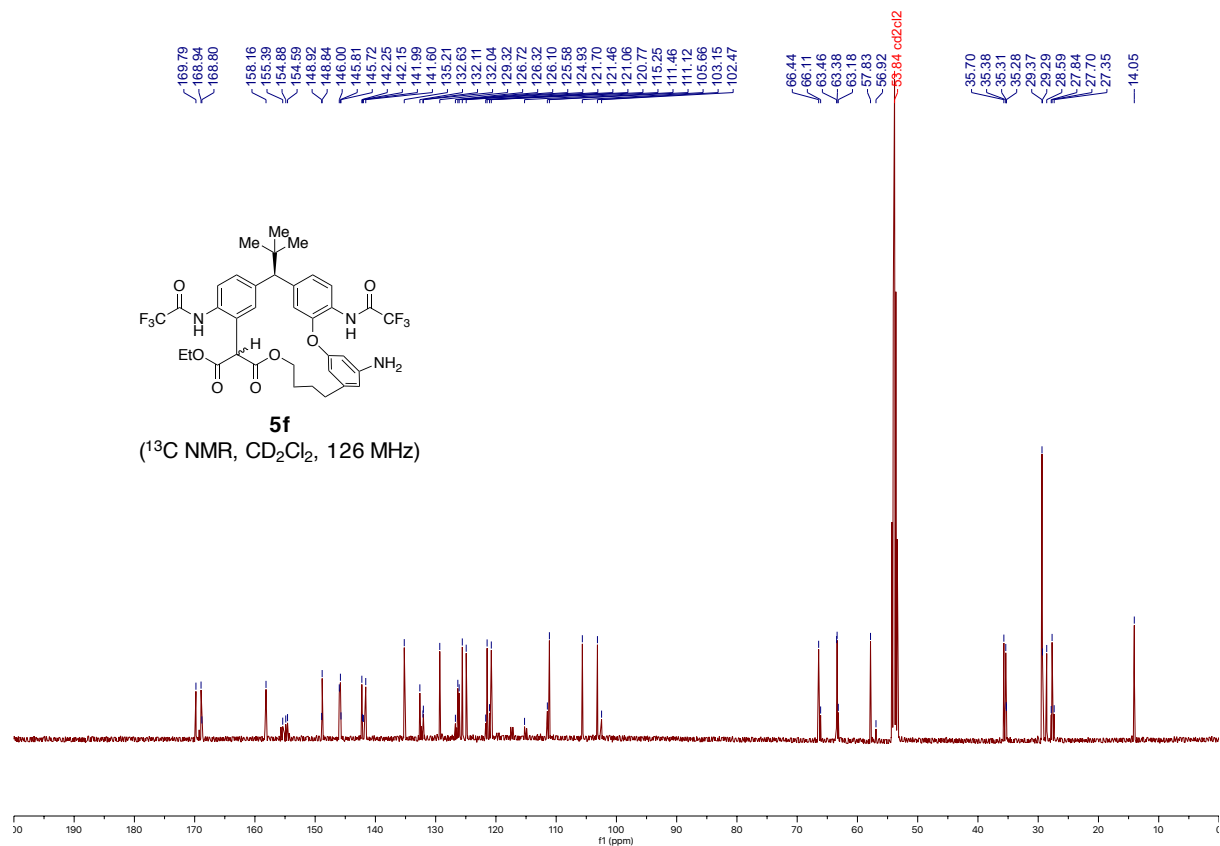

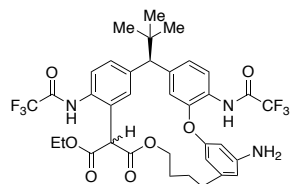

**5f**  
(<sup>19</sup>F NMR, CD<sub>2</sub>Cl<sub>2</sub>, 471 MHz)

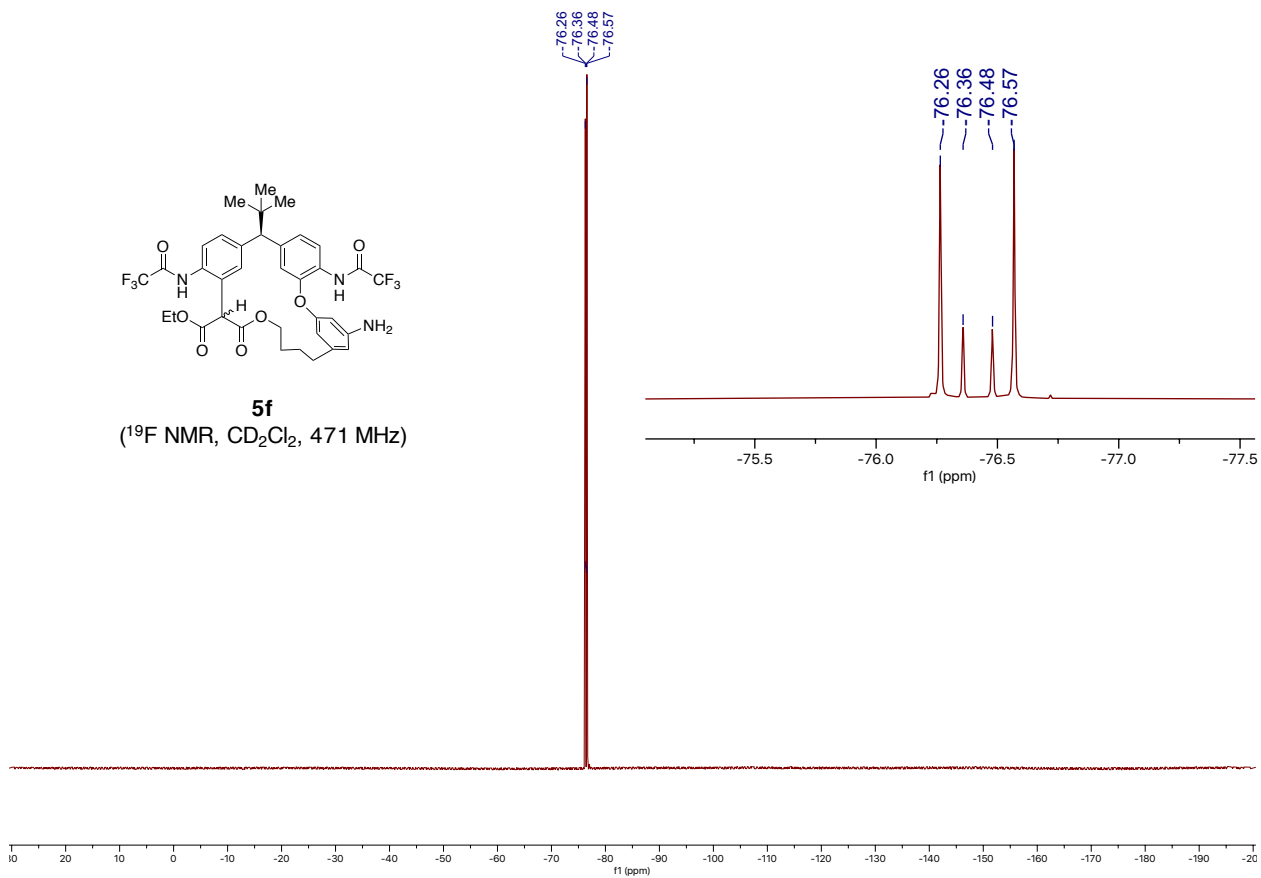

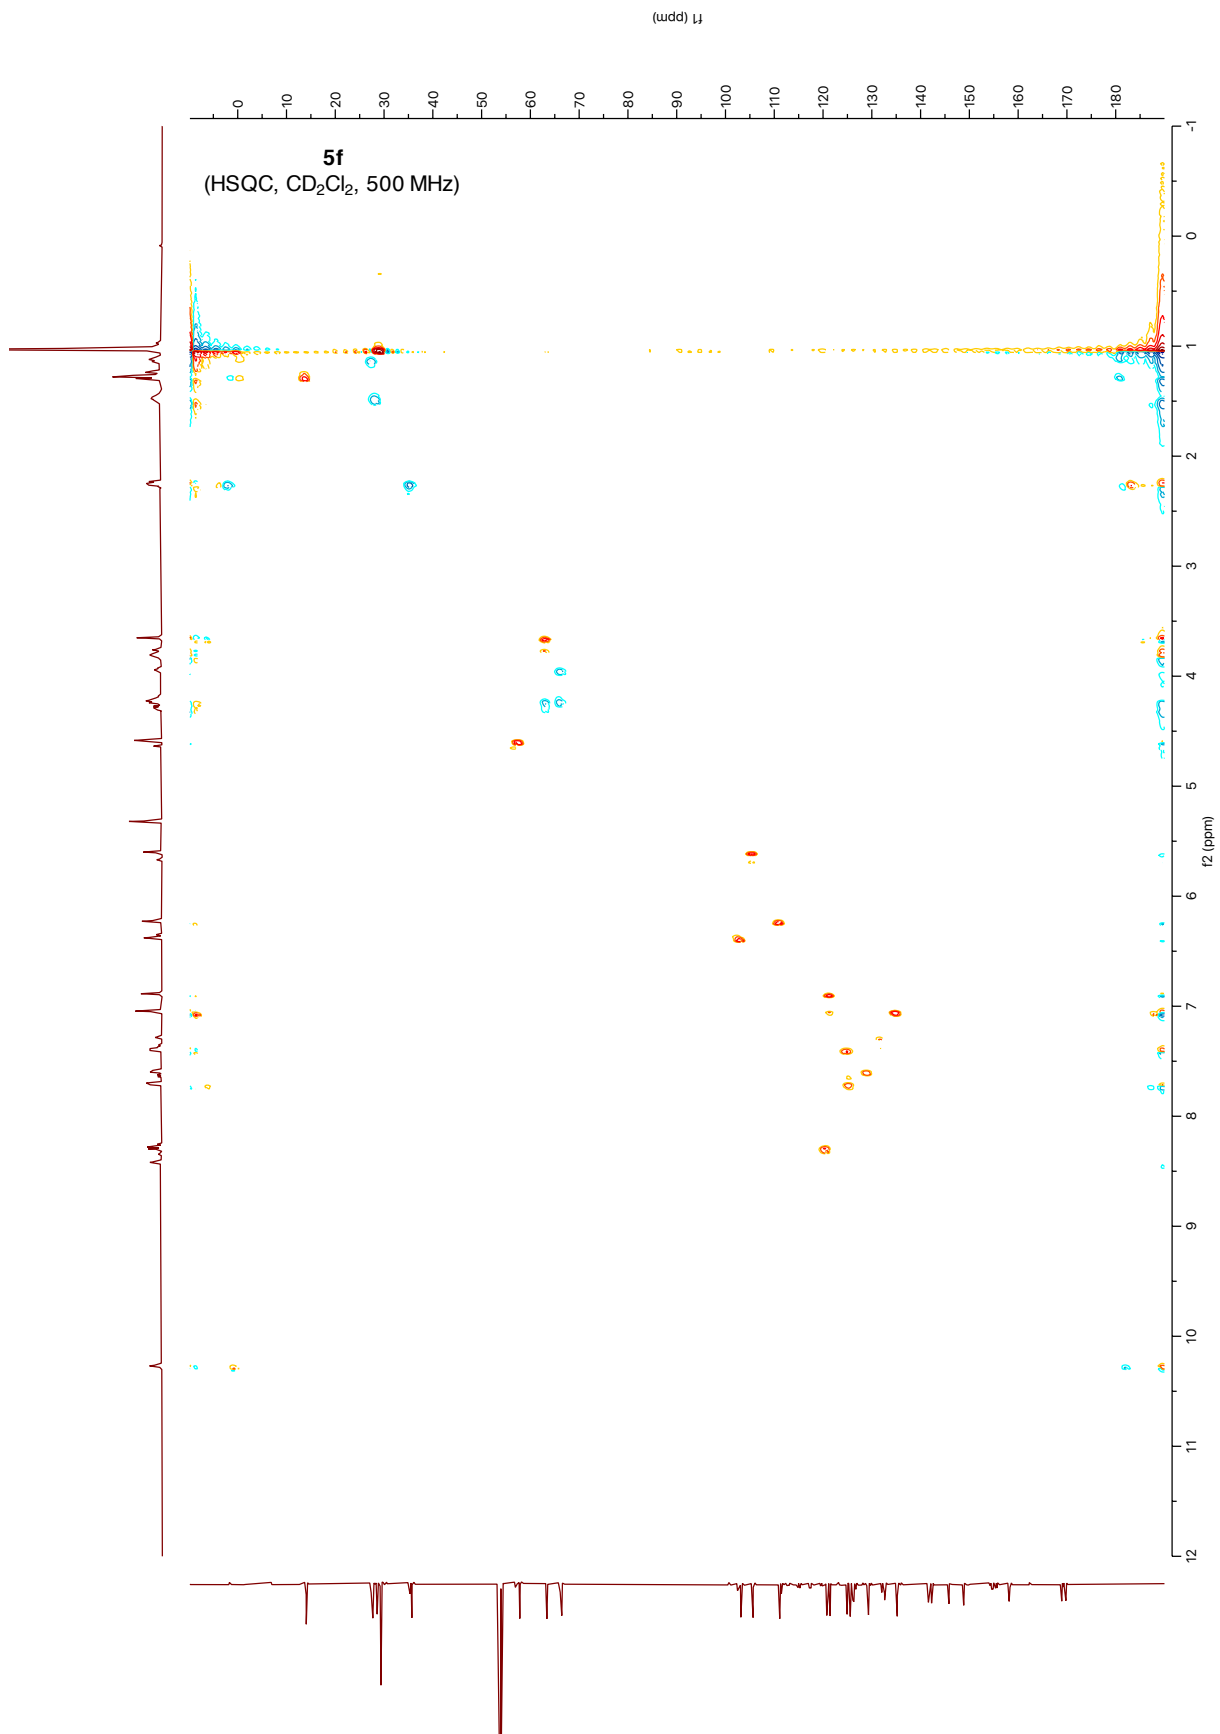

## 12.1 HPLC Traces of Macrocyclic Compounds (4a-f)

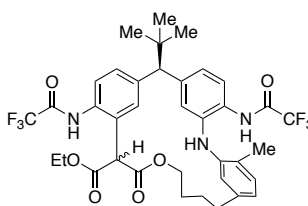

4a

Chiralpak IB

55% MeCN/H<sub>2</sub>O with 0.5% formic acid, 1.250 mL/min, 25 °C, 265 nm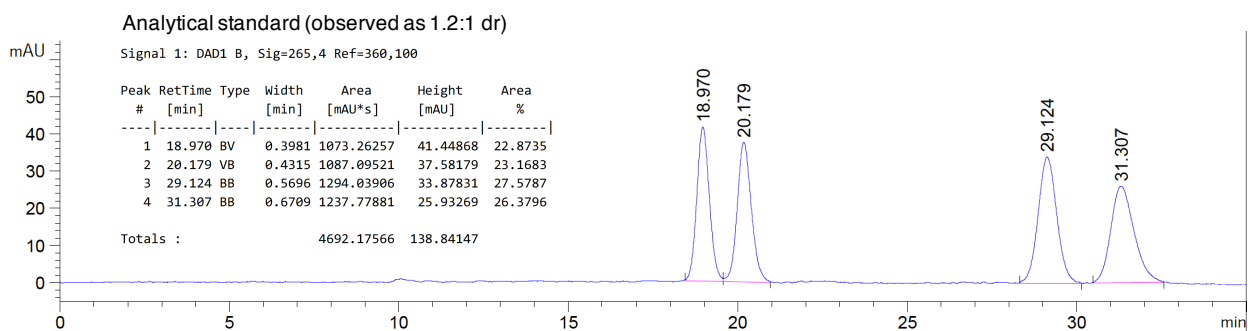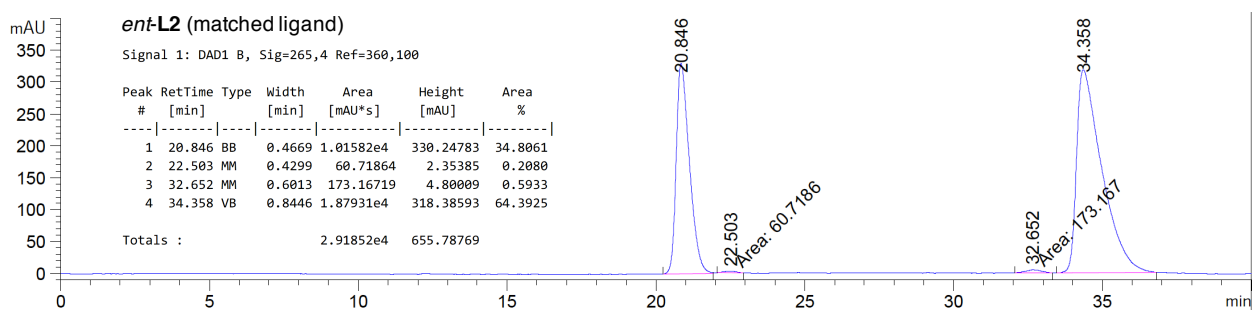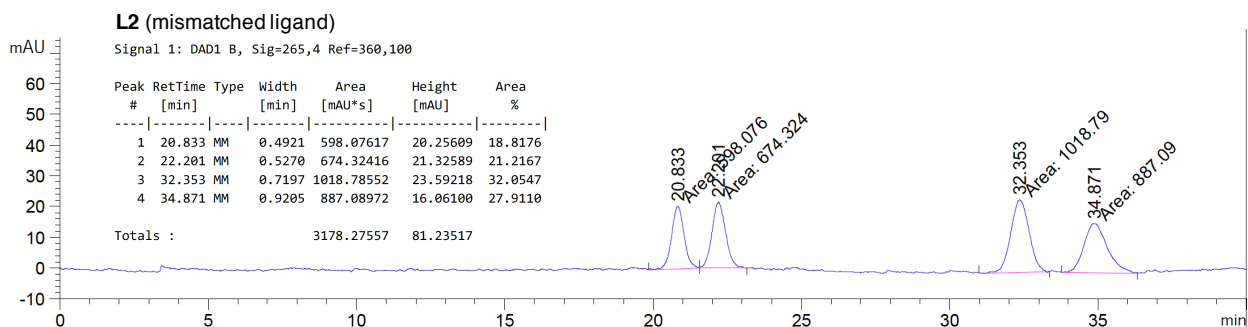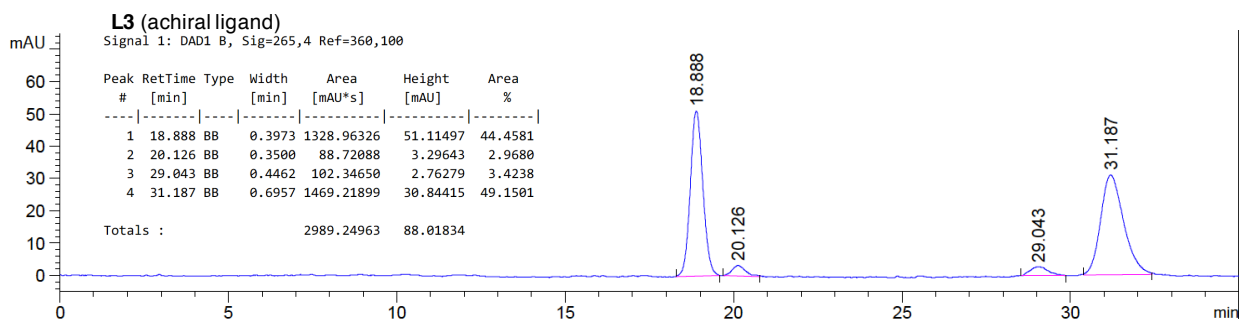

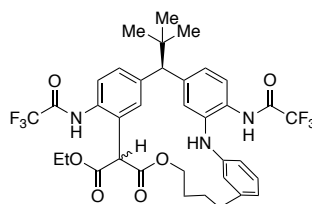**4b**

Chiralpak IB connected to Chiralpak IC  
55% MeCN/H<sub>2</sub>O with 0.5% formic acid, 1.250 mL/min, 25 °C, 265 nm

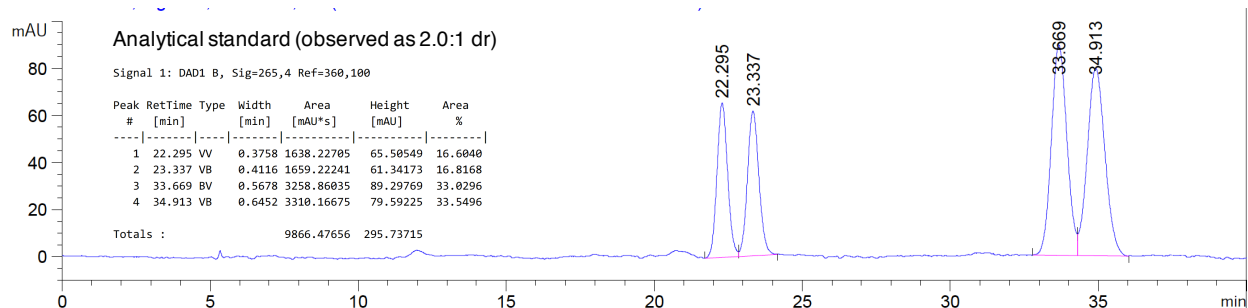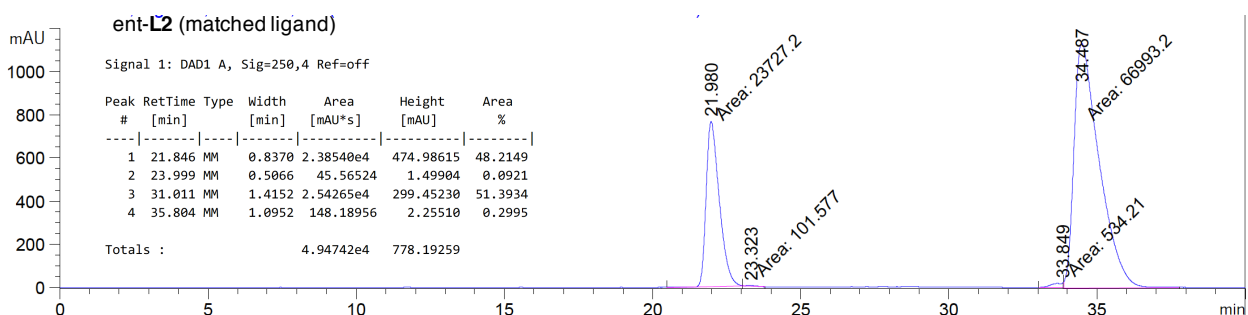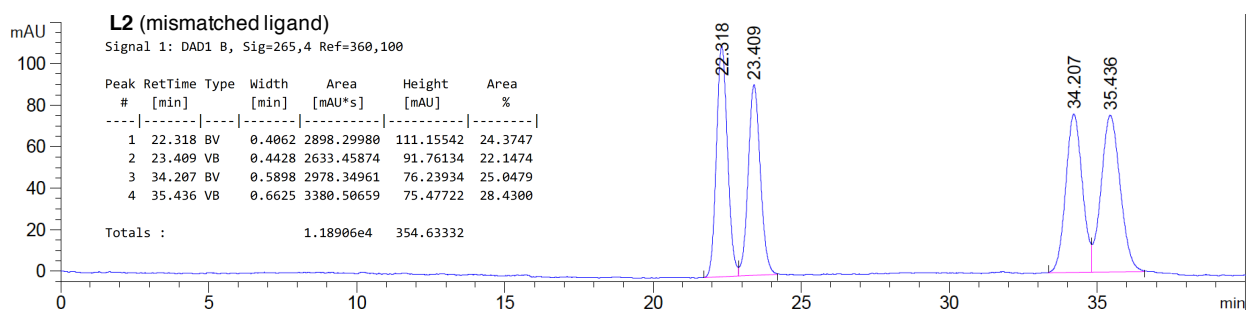**L3 (achiral ligand)**

DAD1 B, Sig=265,4 Ref=360,100 (JHWH-I-168 2020-10-07 13-23-48\015-0101.D)

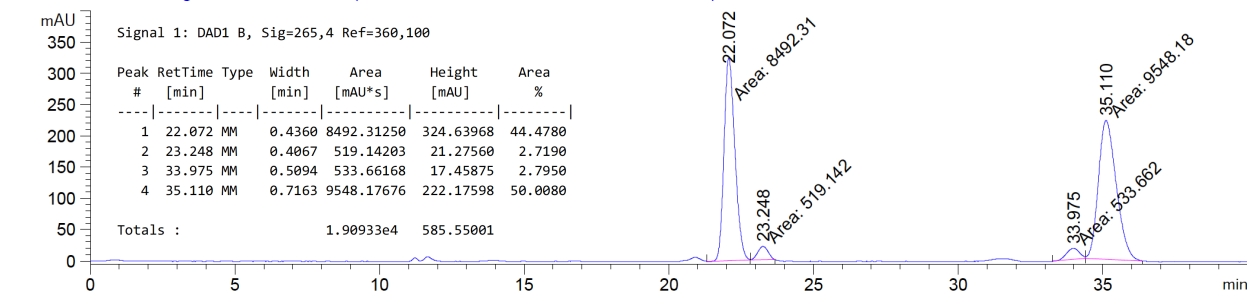



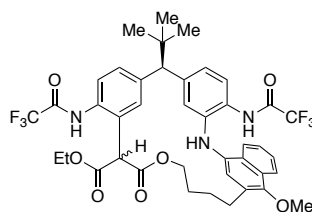**4c**

Chiralpak IB

55% MeCN/H<sub>2</sub>O with 0.5% formic acid, 1.250 mL/min, 25 °C, 265 nm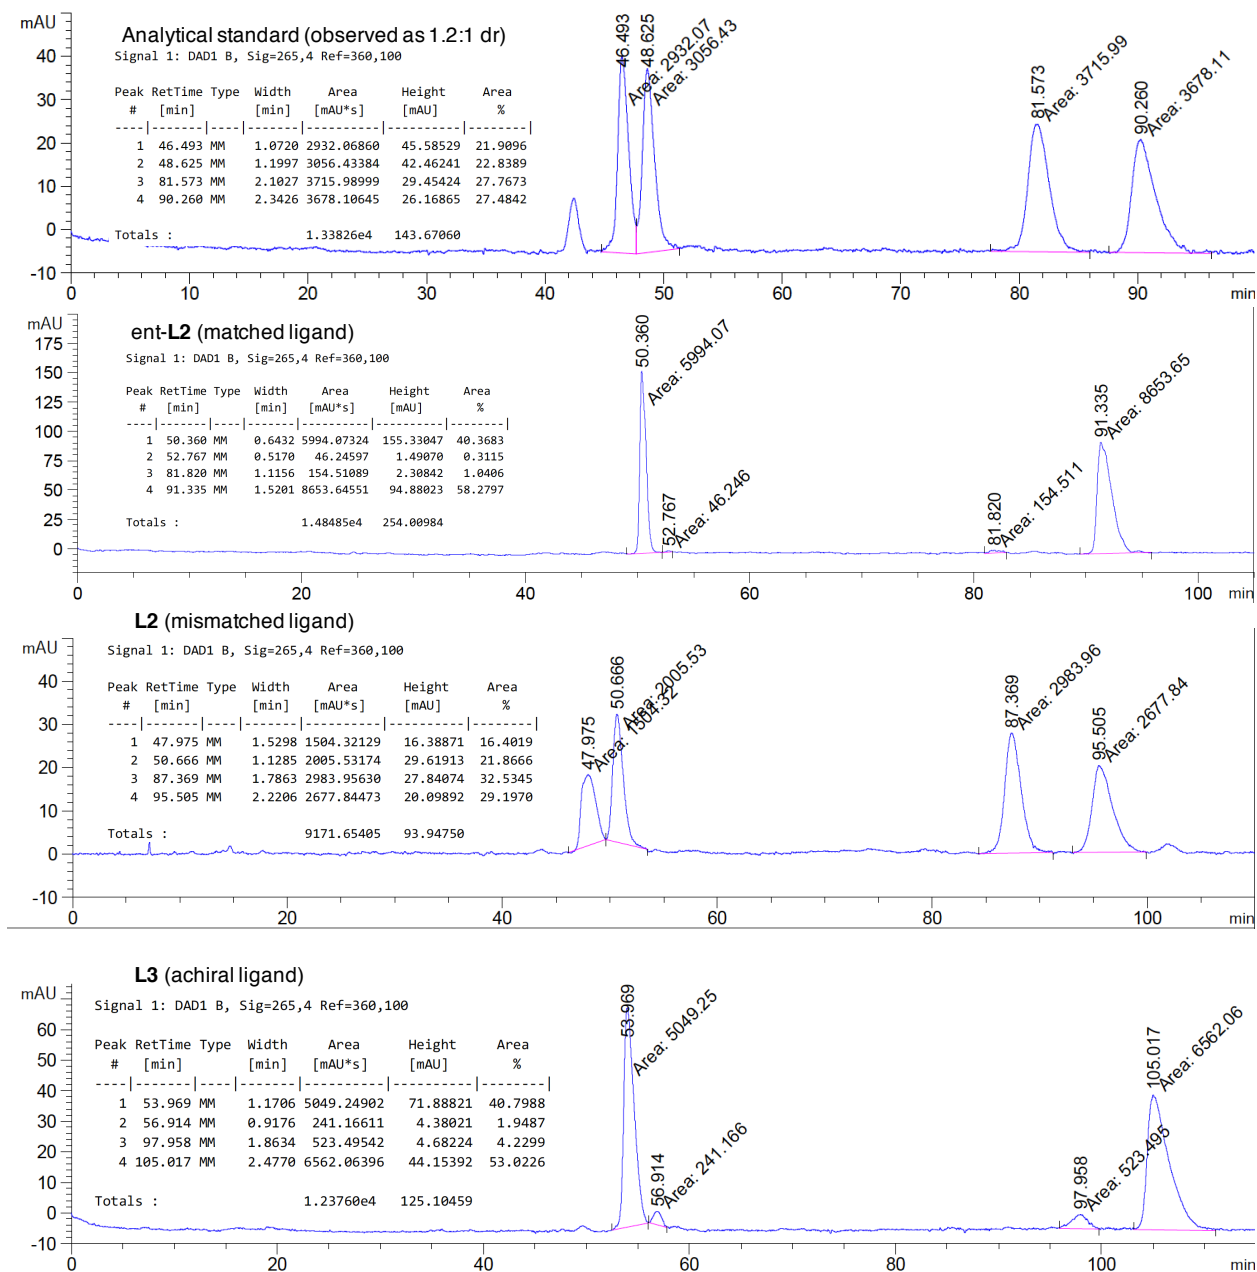

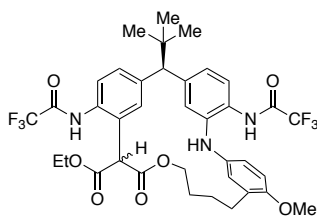

Chiralpak IB

50% MeCN/H<sub>2</sub>O with 0.5% formic acid, 1.000 mL/min, 25 °C, 265 nm.

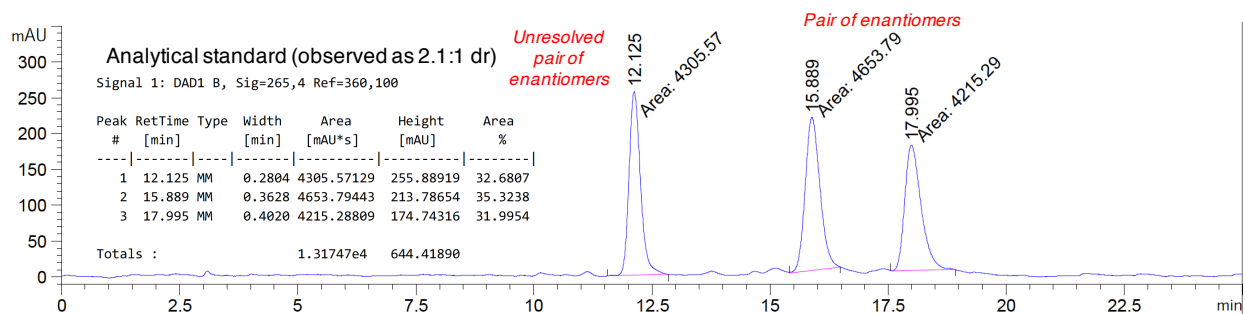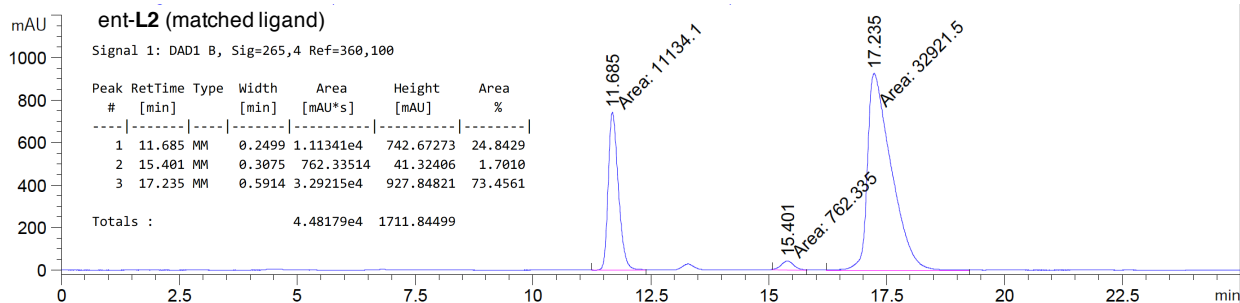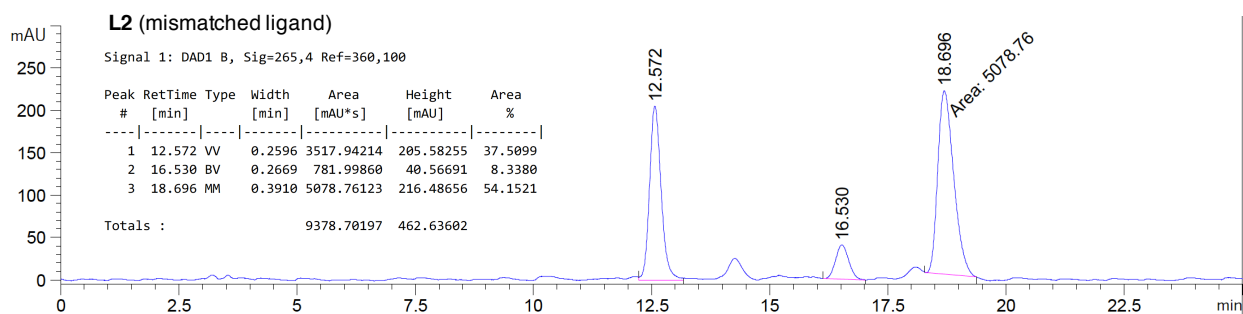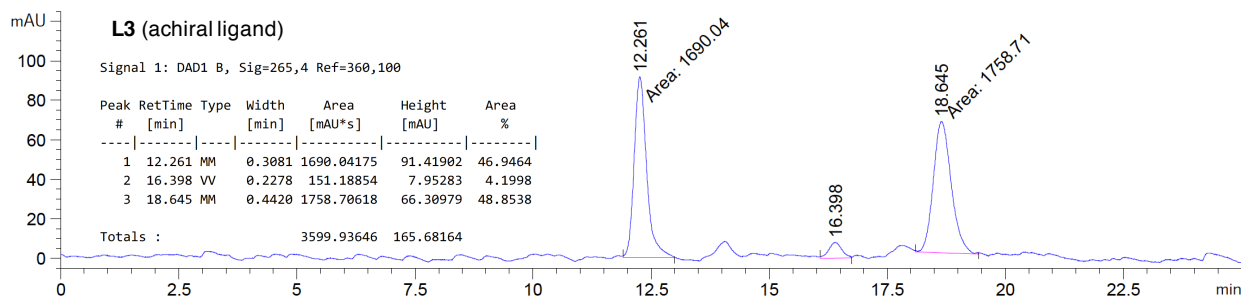

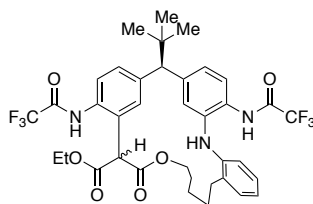**4e**

Chiralpak IB

55% MeCN/H<sub>2</sub>O with 0.5% formic acid, 1.000 mL/min, 25 °C, 265 nm

Analytical standard (observed as 2.1:1 dr)

DAD1 B, Sig=265,4 Ref=360,100 (JH/JH-I-168 2020-08-28 15-50-09/002-0101.D)

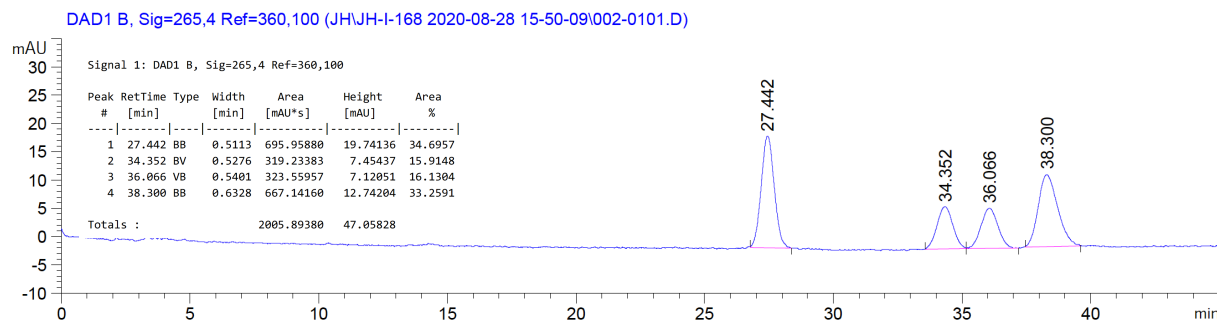

ent-L2 (matched ligand)

DAD1 B, Sig=265,4 Ref=360,100 (JH/JH-I-168 2020-08-28 17-48-13/005-0301.D)

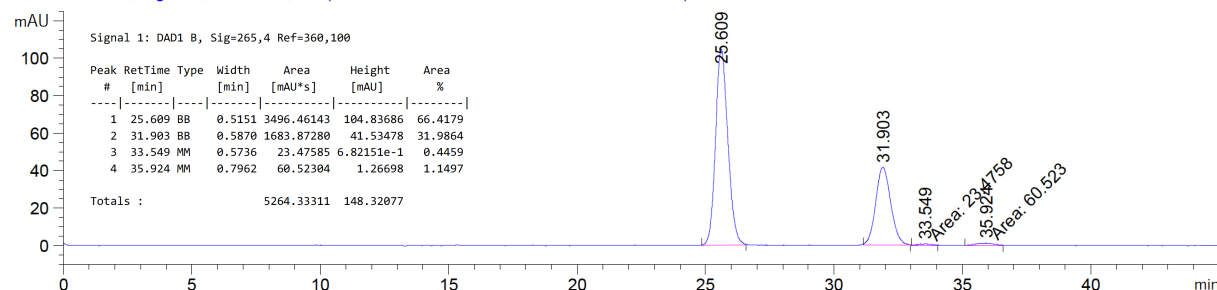

L2 (mismatched ligand)

DAD1 B, Sig=265,4 Ref=360,100 (JH/JH-I-168 2020-08-29 09-33-05/004-0201.D)

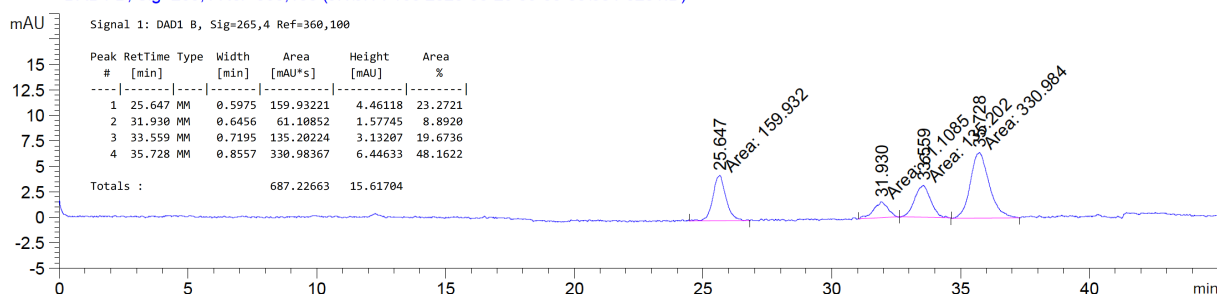

L3 (achiral ligand)

DAD1 B, Sig=265,4 Ref=360,100 (JH/JH-I-168 2020-08-29 09-33-05/003-0101.D)

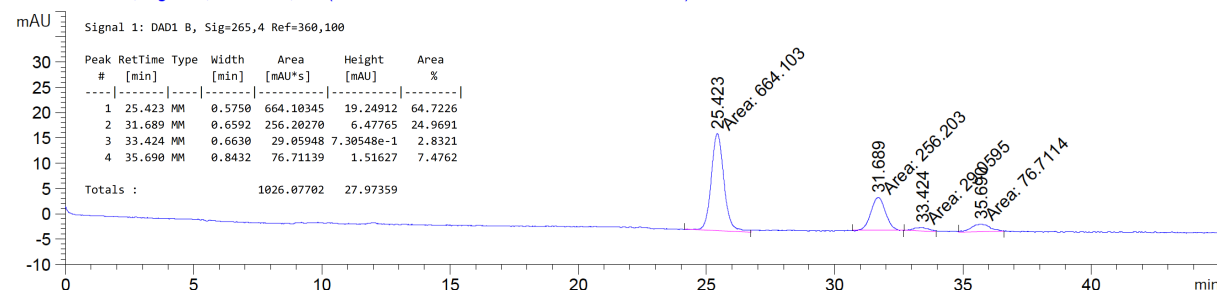

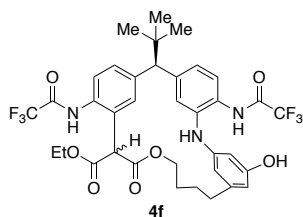

Chiralpak IB  
55% MeCN/H<sub>2</sub>O with 0.5% formic acid  
1.200 mL/min, 25 °C, 265 nm

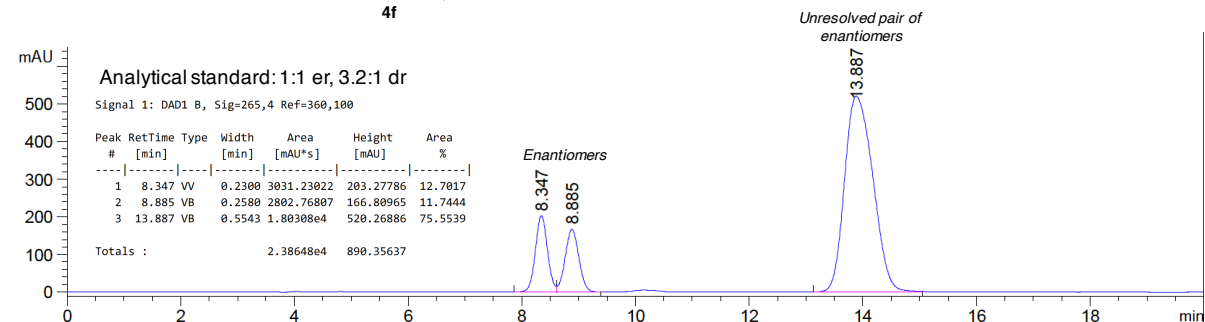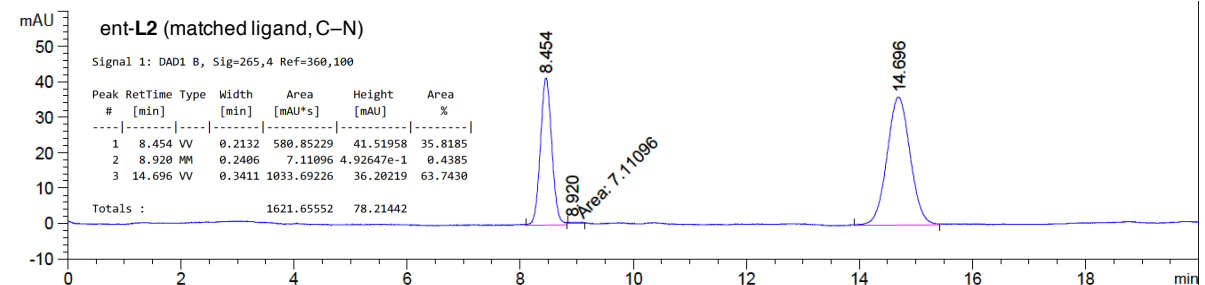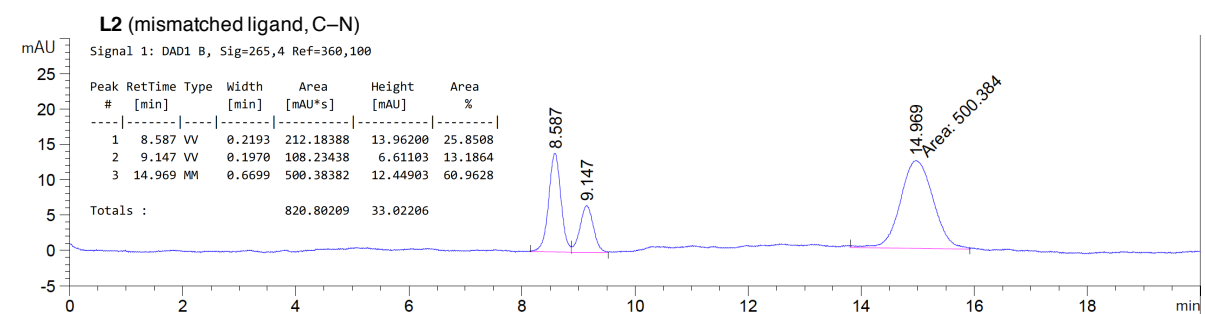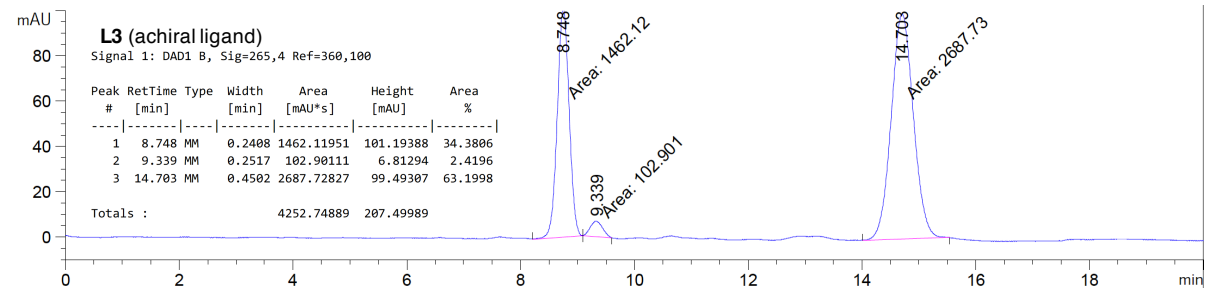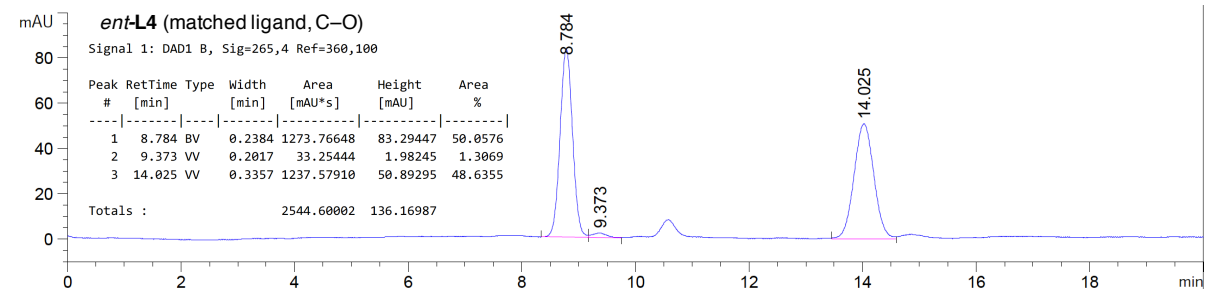

### 13. Product Distribution: Macrocyclization of 3a, 3b and 3c (UPLC-MS Traces)

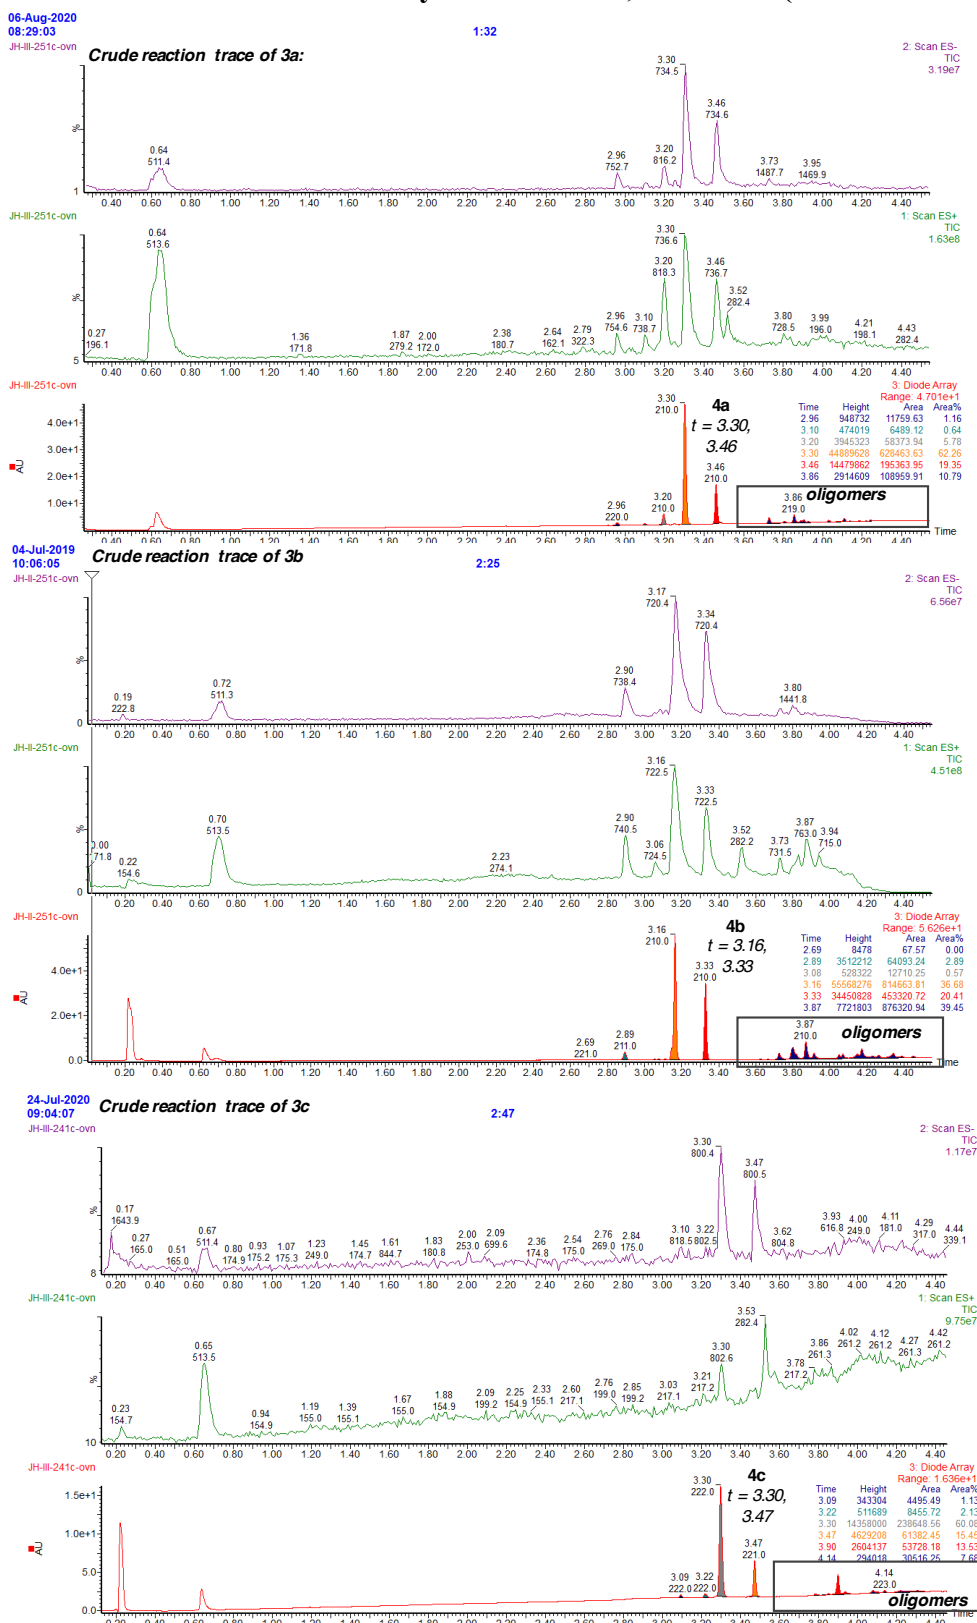

## 14. Product Distribution: Macrocyclization of Aminophenol 3f (UPLC-MS Traces)

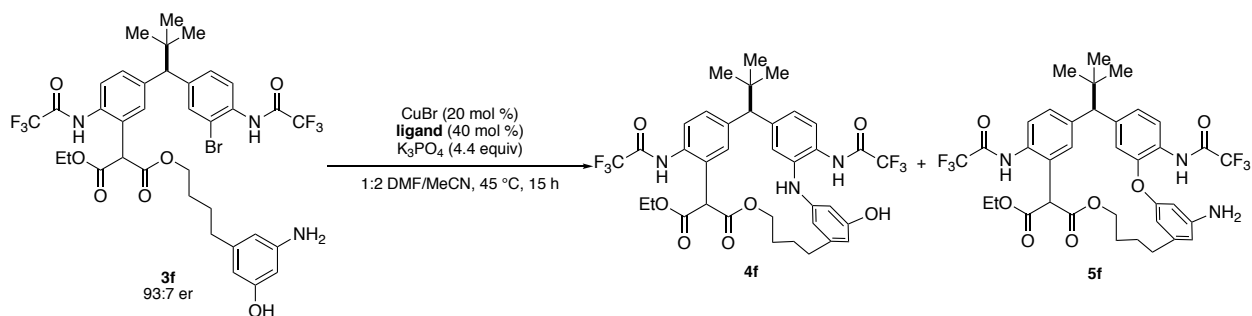

Reaction executed following **Procedure 8**.

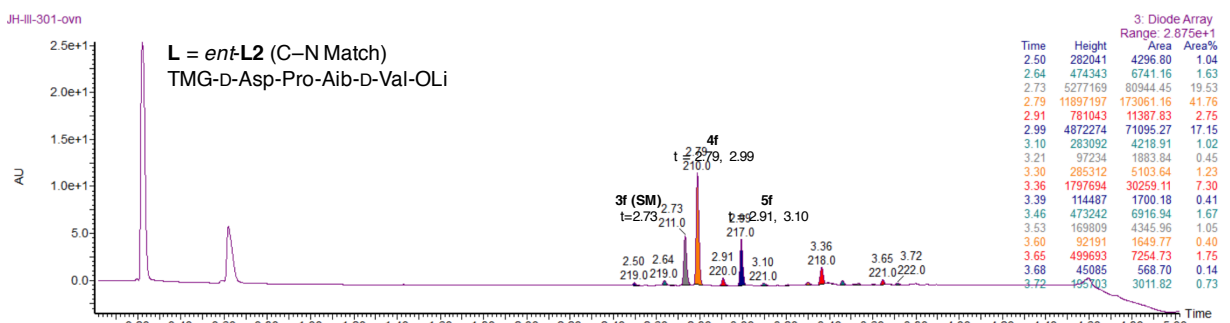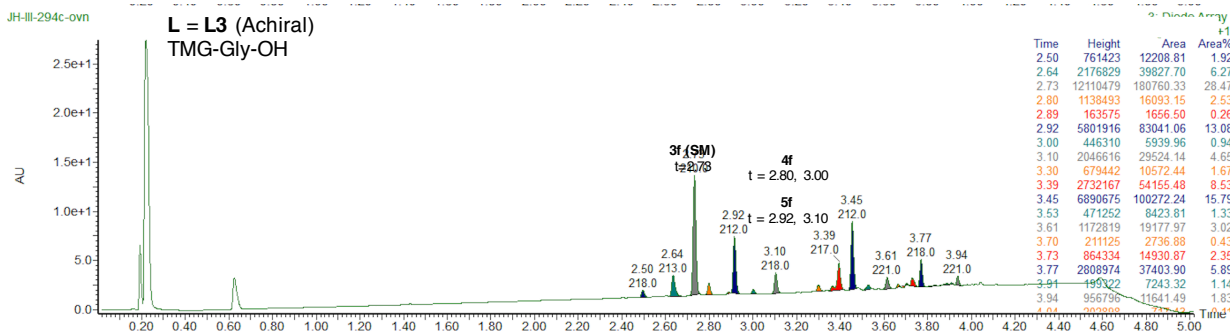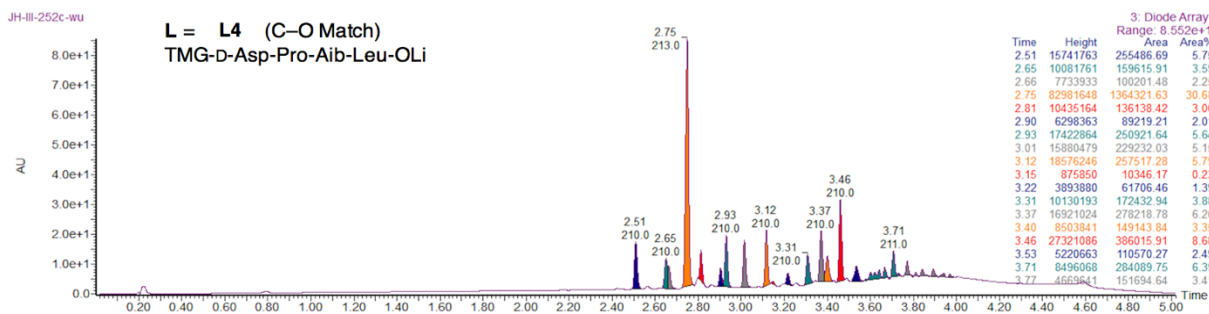

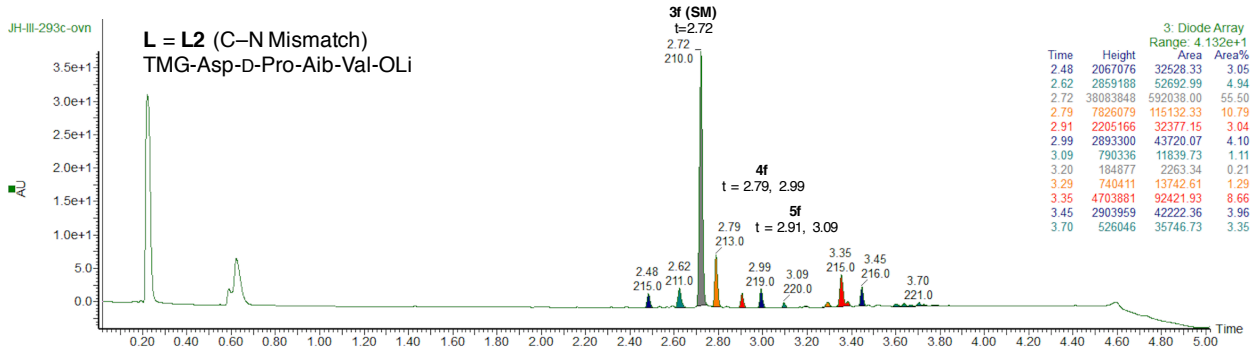

## 15. NMR Studies

15.1 VT-NMR Experiments<sup>a,b,c</sup>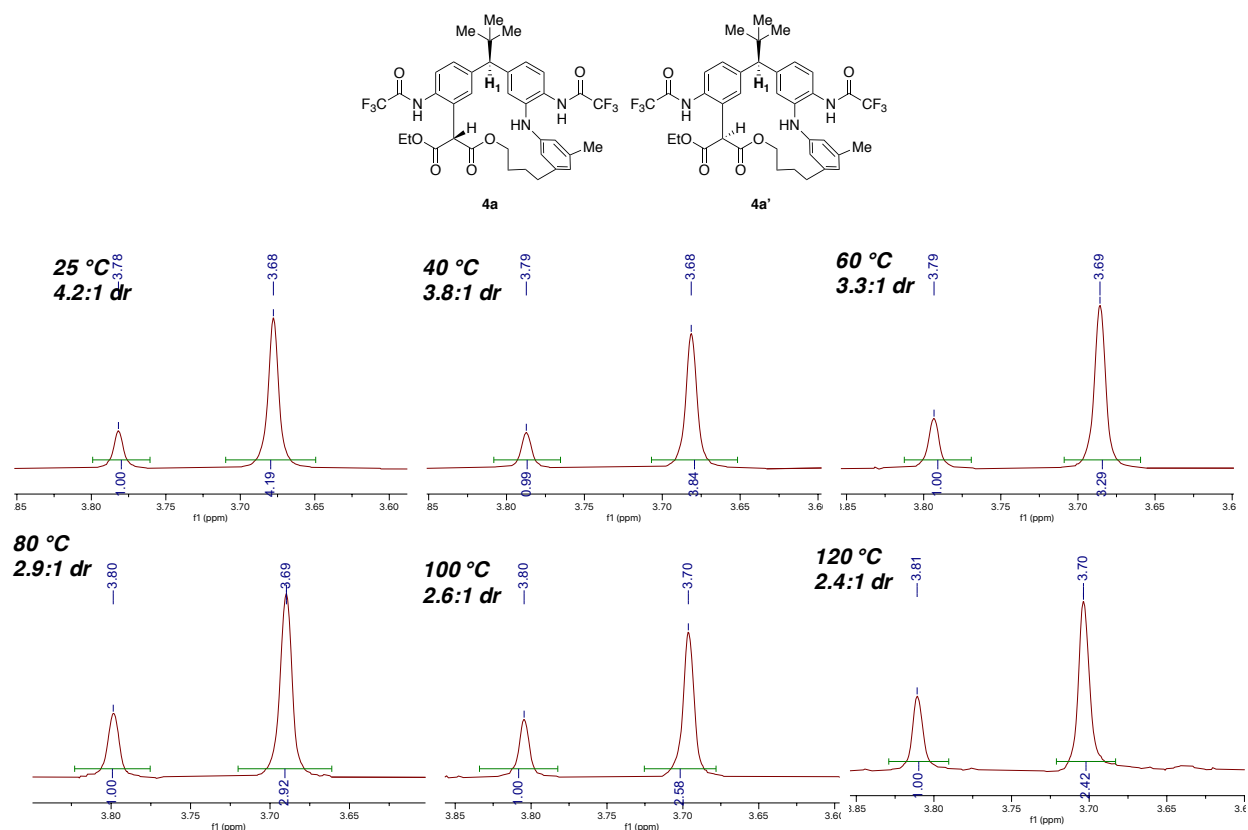

**Figure S2.** <sup>1</sup>H NMR spectra of **4a** and **4a'** (H<sub>1</sub>) in DMSO-*d*<sub>6</sub> from 25–120 °C. a) VT-NMR experiments were performed on a Agilent 500 MHz spectrometer in DMSO-*d*<sub>6</sub>. b) No convergence is observed between two sets of peaks corresponding to H<sub>1</sub>. Change in ratio between two diastereomers is observed.



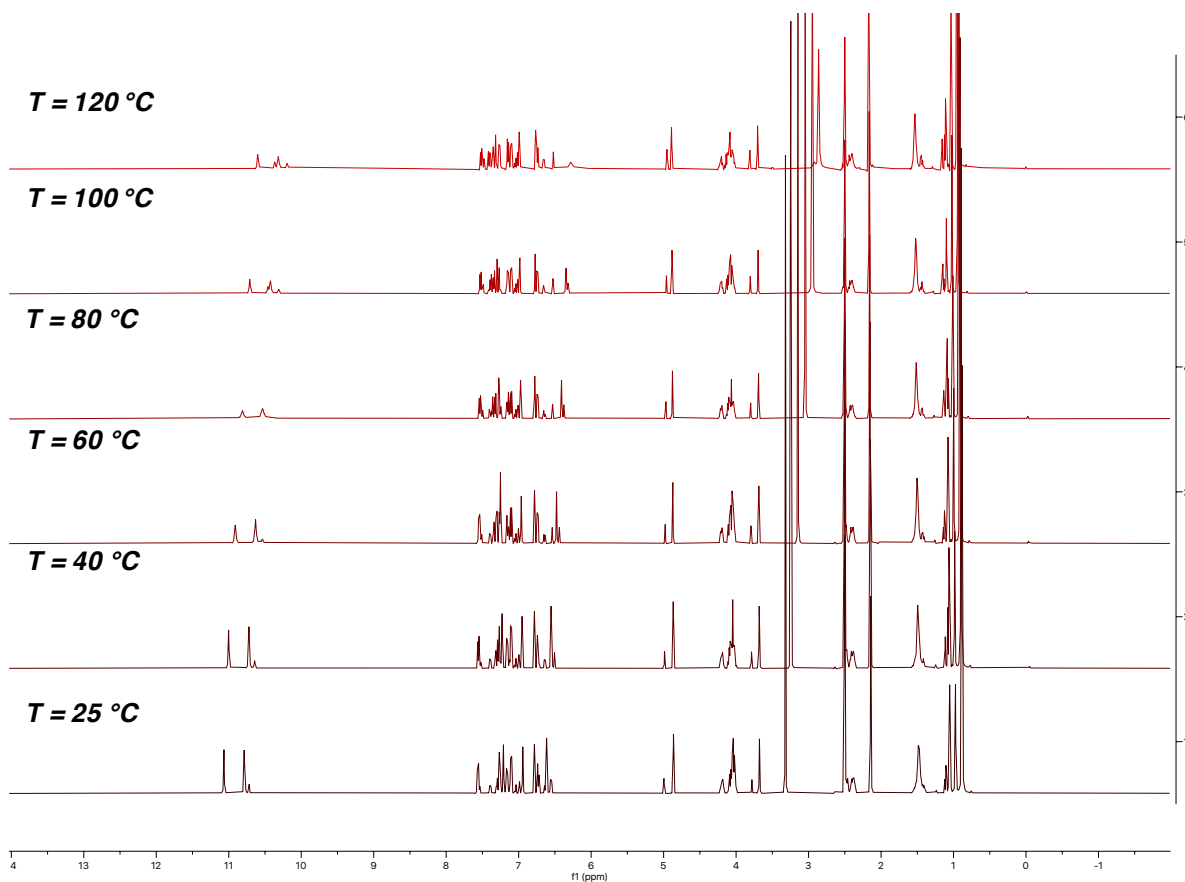

**Figure S3.** Full  $^1\text{H}$  NMR spectra of **4a** and **4a'** in  $\text{DMSO-}d_6$  from 25–120  $^\circ\text{C}$ . a) VT-NMR experiments were performed on Agilent 500 MHz spectrometer in  $\text{DMSO-}d_6$ . c) No significant decomposition is observed.

15.2 Deuterium Incorporation in Methanol- $d_4$ :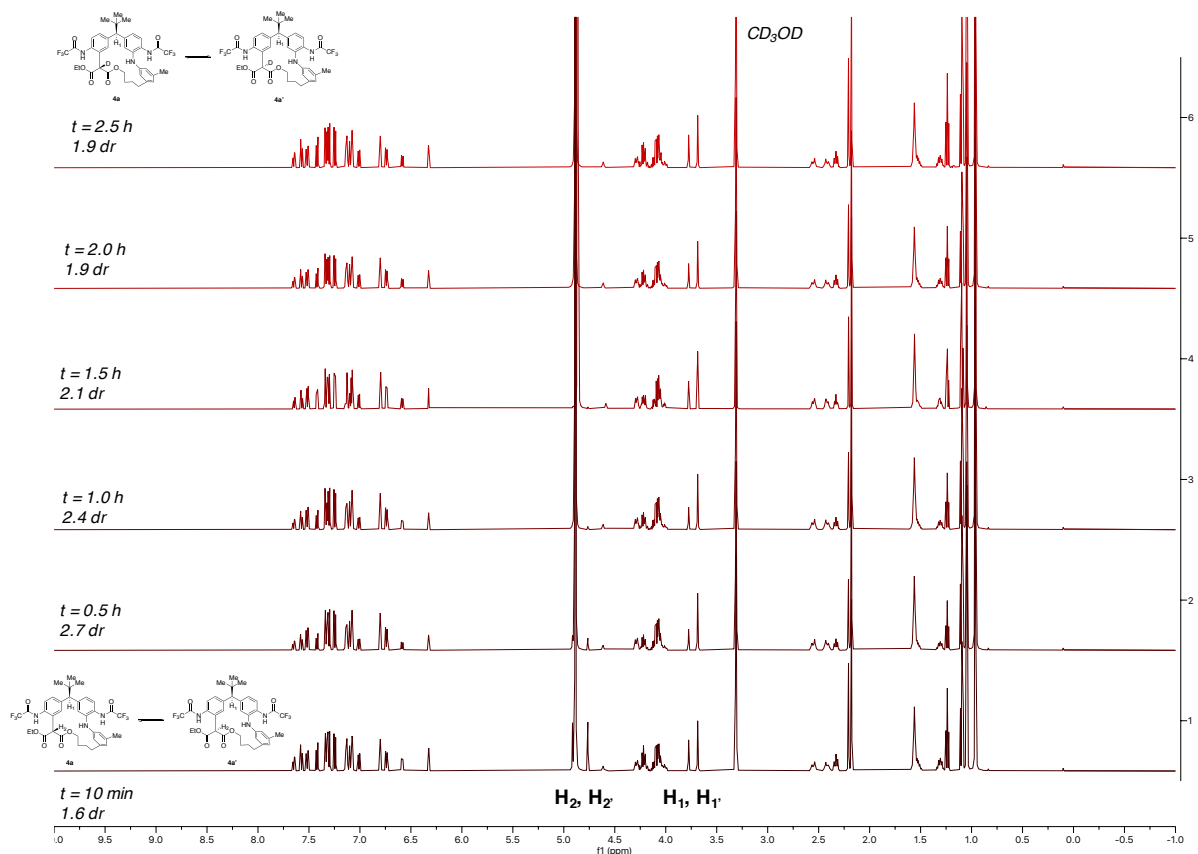Figure S4. Full  $^1\text{H}$  NMR spectrum of **4a** and **4a'** in methanol- $d_4$ .

15.3  $^1\text{H}$  NMR Spectra of 4a in Different NMR Solvents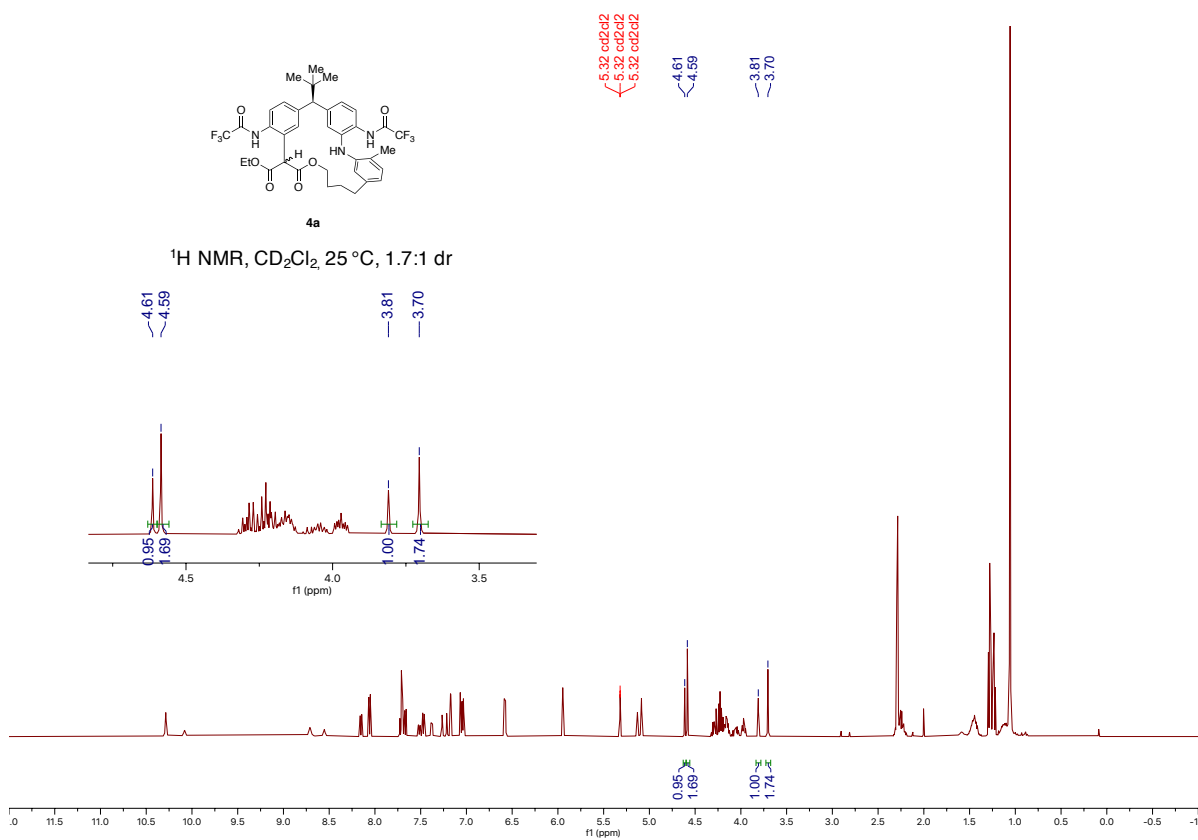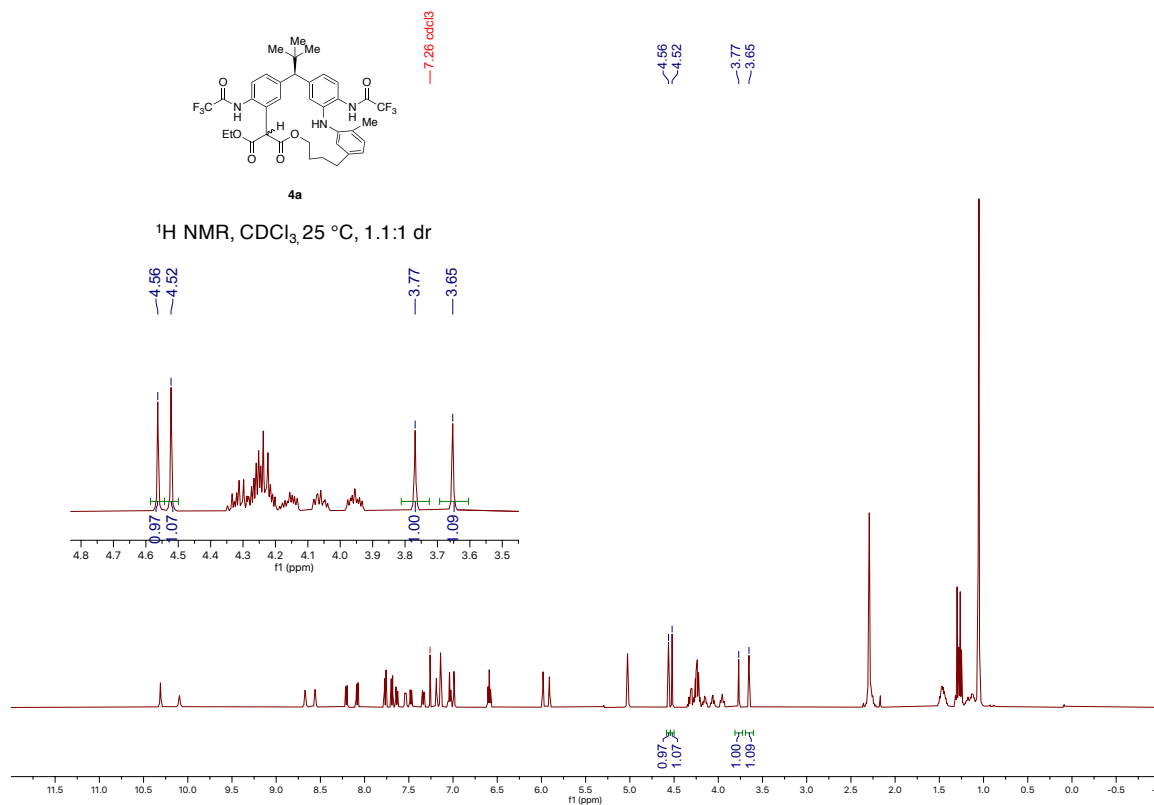

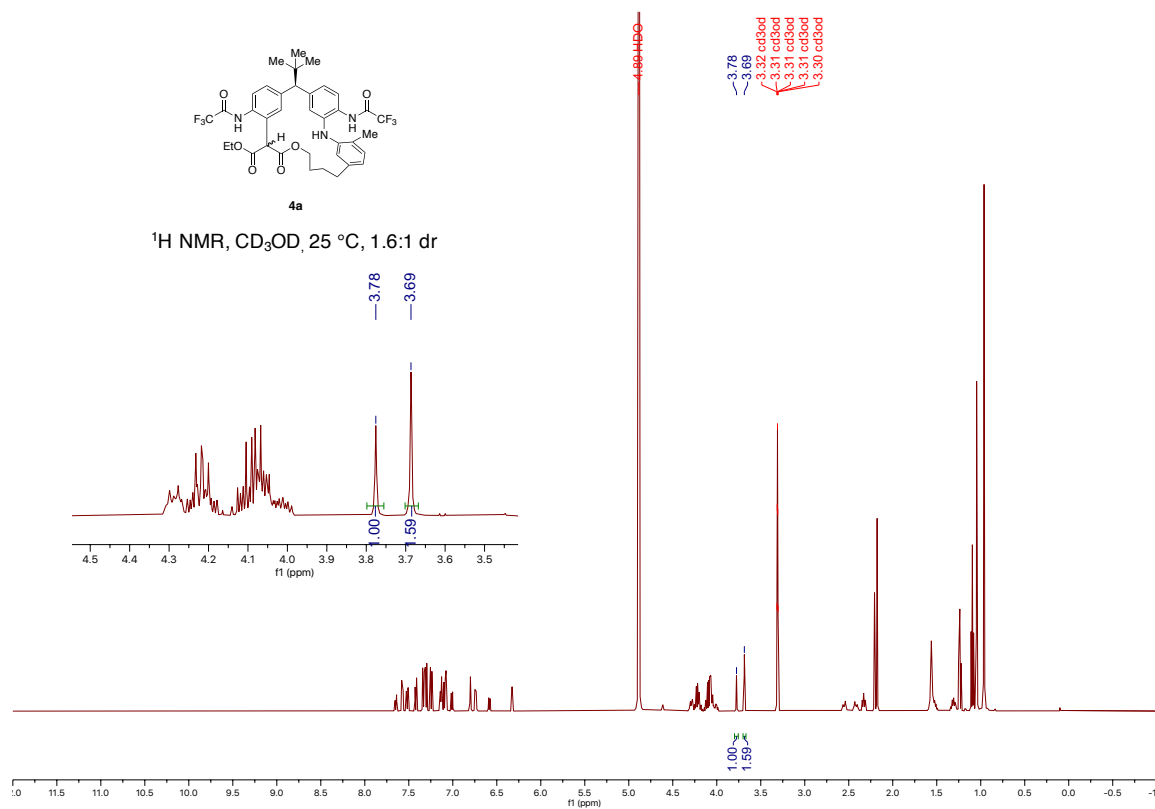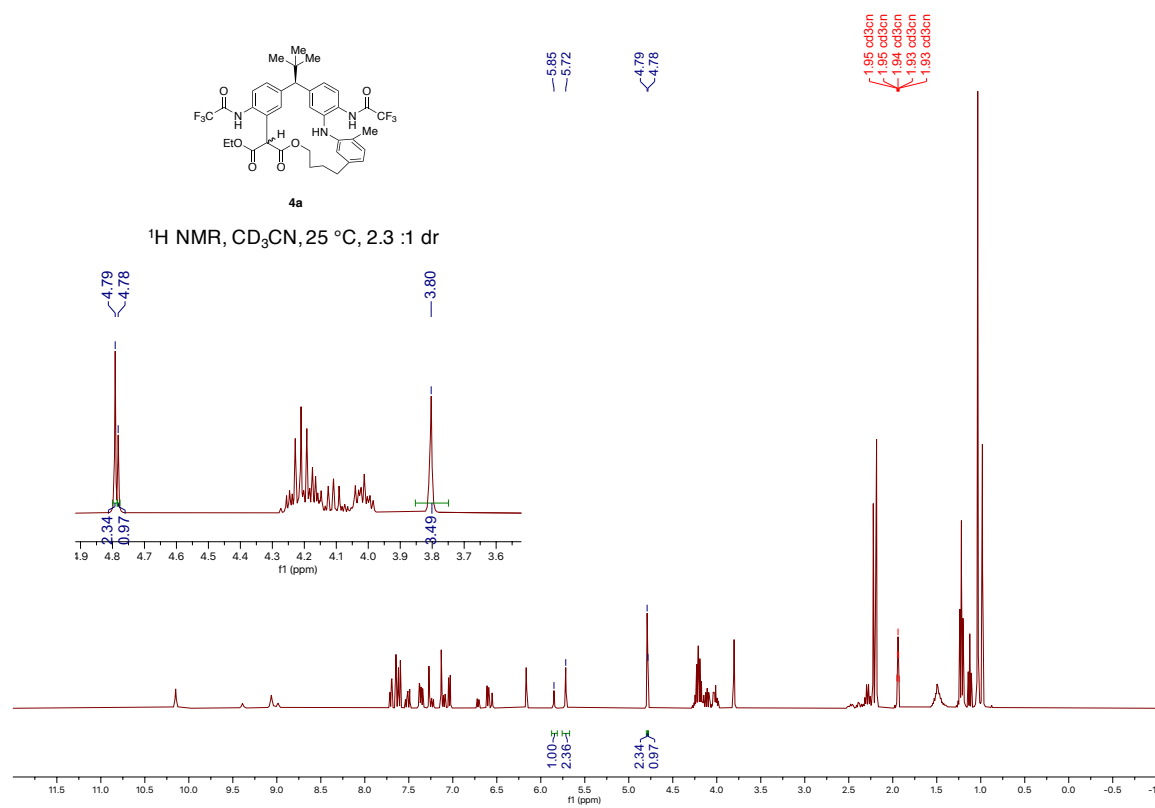

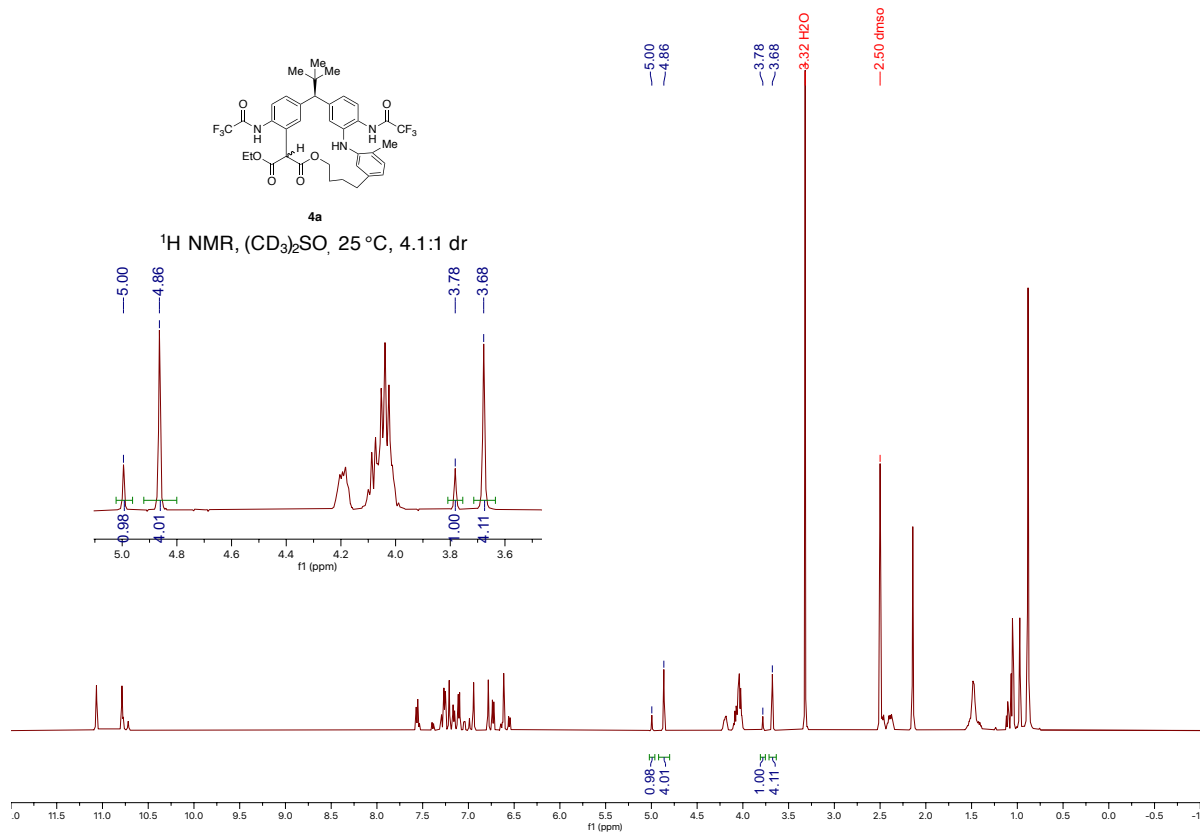

## 16. Crystallographic Data

### Experimental

Low-temperature diffraction data ( $\omega$ -scans) were collected on a Rigaku MicroMax-007HF diffractometer coupled to a Saturn994+ CCD detector with Cu K $\alpha$  ( $\lambda = 1.54178 \text{ \AA}$ ) for the structure of 4a. The diffraction images were processed and scaled using Rigaku Oxford Diffraction software (CrysAlisPro; Rigaku OD: The Woodlands, TX, 2015). The structure was solved with SHELXT and was refined against  $F^2$  on all data by full-matrix least squares with SHELXL (Sheldrick, G. M. Acta Cryst. 2008, A64, 112–122). All non-hydrogen atoms were refined anisotropically. Hydrogen atoms were included in the model at geometrically calculated positions and refined using a riding model. The isotropic displacement parameters of all hydrogen atoms were fixed to 1.2 times the U value of the atoms to which they are linked (1.5 times for methyl groups). There are several sites for disorder in this structure. The CF<sub>3</sub> groups are disordered over two positions. All chemically equivalent 1,2 and 1,3 distances in the disordered models were restrained to be similar. Their atomic displacement parameters were also restrained to be similar. Two of the esters were also disordered over two positions. The disordered C-O and C-C distances were restrained to be similar. The full numbering scheme of compound 4a can be found in the full details of the X-ray structure determination (CIF), which is included as Supporting Information. CCDC number 2081828 (**4a**) contains the supplementary crystallographic data for this paper. These data can be obtained free of charge from The Cambridge Crystallographic Data Center via [www.ccdc.cam.ac.uk/data\\_request/cif](http://www.ccdc.cam.ac.uk/data_request/cif).

A Bayesian statistical analysis of the Bijvoet pairs suggest the model reported here is the true model, with an exceedingly small probability of a model with the opposite chirality or a racemic twin. This analysis was calculated with the PLATON software package (A.L.Spek, Acta Cryst. 2009, D65, 148-155.).

### Model as presented in the CIF

|              |                 |
|--------------|-----------------|
| Space Group  | P2 <sub>1</sub> |
| Wavelength   | 1.54184         |
| Flack x .... | -0.05(8)        |
| Parsons z .. | -0.03(7)        |

### Bayesian Statistics

|               |         |
|---------------|---------|
| Student_T v   | 12      |
| Select Pairs  | 6773    |
| $\theta$ _Min | 3.11°   |
| $\theta$ _Max | 66.59°  |
| P2(true)      | 1.000   |
| P3(true)      | 1.000   |
| P3(rac-twin)  | 0.7E-13 |
| P3(false)     | 0.2E-49 |
| G             | 1.0501  |

G (su) 0.1347  
 Hooft y -0.03(7)

Inverted model

Space Group P21  
 Wavelength 1.54184  
 Flack x .... 1.05(8)  
 Parsons z .. 1.03(7)

Bayesian Statistics

Student\_T v 12  
 Select Pairs 6773  
 $\theta$ \_Min 3.11  
 $\theta$ \_Max 66.59  
 P2(true) 0.3E-49  
 P3(true) 0.3E-49  
 P3(rac-twin) 0.8E-13  
 P3(false) 1.000  
 G -1.0481  
 G (su) 0.1347  
 Hooft y 1.02(7)

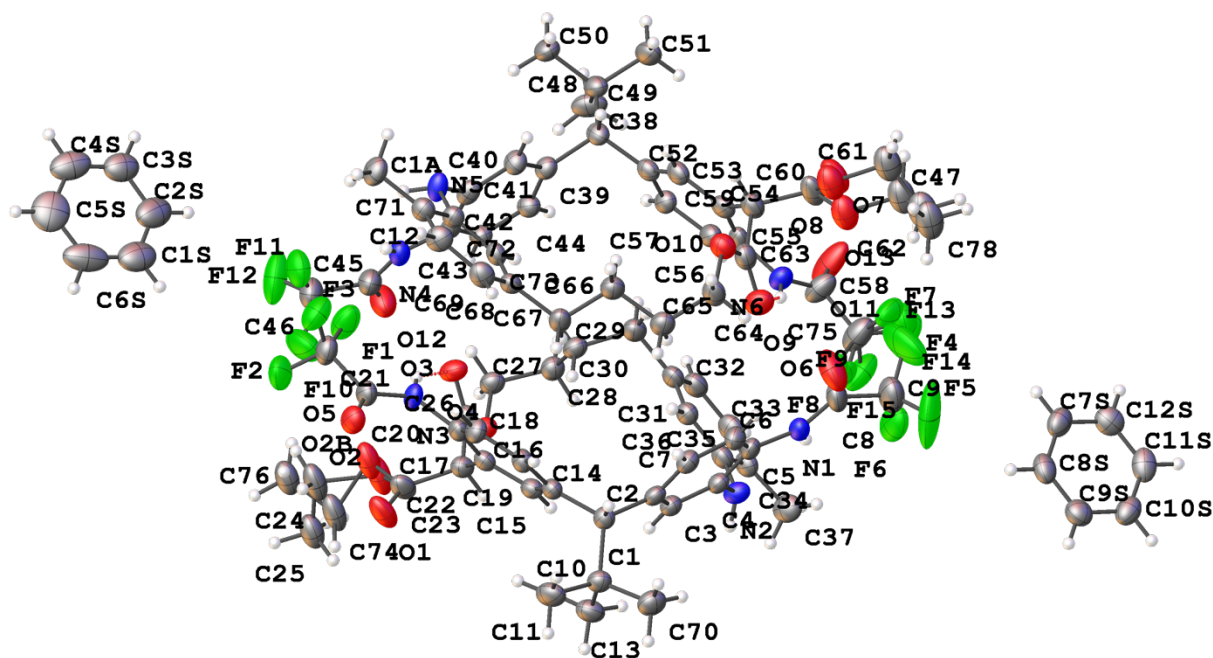

Figure 1. The complete numbering scheme of 4a with 50% thermal ellipsoid probability levels. The hydrogen atoms are shown as circles for clarity.

Table 1. Crystal data and structure refinement for 4a.

|                                   |                                                                              |
|-----------------------------------|------------------------------------------------------------------------------|
| Identification code               | 007b-21047                                                                   |
| Empirical formula                 | C <sub>43</sub> H <sub>45</sub> F <sub>6</sub> N <sub>3</sub> O <sub>6</sub> |
| Formula weight                    | 813.82                                                                       |
| Temperature                       | 93(2) K                                                                      |
| Wavelength                        | 1.54184 Å                                                                    |
| Crystal system                    | Monoclinic                                                                   |
| Space group                       | P2 <sub>1</sub>                                                              |
| Unit cell dimensions              | a = 9.83610(10) Å    α = 90°.                                                |
|                                   | b = 22.6576(3) Å    β = 102.3820(10)°.                                       |
|                                   | c = 18.7122(2) Å    γ = 90°.                                                 |
| Volume                            | 4073.24(8) Å <sup>3</sup>                                                    |
| Z                                 | 4                                                                            |
| Density (calculated)              | 1.327 Mg/m <sup>3</sup>                                                      |
| Absorption coefficient            | 0.906 mm <sup>-1</sup>                                                       |
| F(000)                            | 1704                                                                         |
| Crystal size                      | 0.200 x 0.200 x 0.020 mm <sup>3</sup>                                        |
| Crystal color and habit           | colorless plate                                                              |
| Diffraction                       | Rigaku Saturn 944+ CCD                                                       |
| Theta range for data collection   | 2.417 to 66.593°.                                                            |
| Index ranges                      | -11 ≤ h ≤ 11, -26 ≤ k ≤ 26, -22 ≤ l ≤ 22                                     |
| Reflections collected             | 123574                                                                       |
| Independent reflections           | 14178 [R(int) = 0.0925]                                                      |
| Observed reflections (I > 2σ(I))  | 11671                                                                        |
| Completeness to theta = 66.593°   | 100.0 %                                                                      |
| Absorption correction             | Semi-empirical from equivalents                                              |
| Max. and min. transmission        | 1.00000 and 0.90494                                                          |
| Solution method                   | SHELXT-2014/5 (Sheldrick, 2014)                                              |
| Refinement method                 | SHELXL-2014/7 (Sheldrick, 2014)                                              |
| Data / restraints / parameters    | 14178 / 199 / 1129                                                           |
| Goodness-of-fit on F <sup>2</sup> | 1.015                                                                        |
| Final R indices [I > 2σ(I)]       | R1 = 0.0559, wR2 = 0.1356                                                    |
| R indices (all data)              | R1 = 0.0723, wR2 = 0.1474                                                    |
| Absolute structure parameter      | -0.05(8)                                                                     |
| Largest diff. peak and hole       | 0.554 and -0.463 e.Å <sup>-3</sup>                                           |



## References

1. G. R. Fulmer *et al.*, NMR Chemical Shifts of Trace Impurities: Common Laboratory Solvents, Organics, and Gases in Deuterated Solvents Relevant to the Organometallic Chemist. *Organometallics* **29**, 2176–2179 (2010).
2. a) B. Kim, A. J. Chinn, D. R. Fandrick, C. H. Senanayake, R. A. Singer, S. J. Miller, Distal Stereocontrol Using Guanidinylated Peptides as Multifunctional Ligands: Desymmetrization of Diarylmethanes via Ullman Cross-Coupling. *J. Am. Chem. Soc.* **138**, 7939–7945 (2016). b) A. J. Chinn, B. Kim, Y. Kwon, S. J. Miller, Enantioselective Intermolecular C–O Bond Formation in the Desymmetrization of Diarylmethines Employing a Guanidinylated Peptide-Based Catalyst. *J. Am. Chem. Soc.* **139**, 18107–18114 (2017). c) Y. Kwon, A. J. Chinn, B. Kim, S. J. Miller, Divergent Control of Point and Axial Stereogenicity: Catalytic Enantioselective C–N Bond-Forming Cross-Coupling and Catalyst-Controlled Atroposelective Cyclodehydration. *Angew. Chem. Int. Ed.* **57**, 6251–6255 (2018).
3. E. Moreau *et al.*, Optimized *N*-Phenyl-*N'*-(2-chloroethyl)ureas as Potential Antineoplastic Agents: Synthesis and Growth Inhibition Activity. *Bioorg. Med. Chem.* **13**, 6703–6712 (2005).
4. F. A. Abulwerdi *et al.*, 3-Substituted-*N*-(4-Hydroxynaphthalen-1-yl)arylsulfonamides as a Novel Class of Selective Mcl-1 Inhibitors: Structure-Based Design, Synthesis, SAR, and Biological Evaluation. *J. Med. Chem.* **57**, 4111–4133 (2014).
5. C. Holt, G. Alachouzou, A. J. Frontier, Leveraging the Halo-Nazarov Cyclization for the Chemodivergent Assembly of Functionalized Haloindenes and Indanones. *J. Am. Chem. Soc.* **141**, 5461–5469 (2019).
6. B. R. Ambler, S. Peddi, R. A. Altman, Ligand-Controlled Regioselective Copper-Catalyzed Trifluoromethylation To Generate (Trifluoromethyl)allenes. *Org. Lett.* **17**, 2506–2509 (2015).
7. P. Patel, C. V. Ramana, Divergent Pd(II) and Au(III) mediated nitroalkynol cycloisomerizations. *Org. Biomol. Chem.* **9**, 7327–7334 (2011).
